# Supplementary material
Source: ML conference proceedings conference paper supplement (https://openreview.net/forum?id=d6kqUKzG3V)
Supplement: supplementary_material [file Pistachio_28_Features_Dataset.xlsx]

## Sheet: Pistachio_28_Features_Dataset
Area	Perimeter	Major_Axis	Minor_Axis	Eccentricity	Eqdiasq	Solidity	Convex_Area	Extent	Aspect_Ratio	Roundness	Compactness	Shapefactor_1	Shapefactor_2	Shapefactor_3	Shapefactor_4	Mean_RR	Mean_RG	Mean_RB	StdDev_RR	StdDev_RG	StdDev_RB	Skew_RR	Skew_RG	Skew_RB	Kurtosis_RR	Kurtosis_RG	Kurtosis_RB	Class
63391	1568.4	390.34	236.746	0.7951	284.098	0.8665	73160	0.6394	1.6488	0.3238	0.7278	0.0062	0.0037	0.5297	0.8734	195.993	180.267	165.317	17.7206	19.6024	21.1342	0.4581	0.6635	0.7591	2.9692	3.0576	2.9542	Kirmizi_Pistachio
68358	1942.19	410.859	234.752	0.8207	295.019	0.8765	77991	0.6772	1.7502	0.2277	0.7181	0.006	0.0034	0.5156	0.9024	222.594	208.621	187.374	26.7061	27.2112	25.1035	-0.3847	-0.2713	-0.2927	1.9807	2.1006	2.2152	Kirmizi_Pistachio
73589	1246.54	452.363	220.555	0.8731	306.099	0.9172	80234	0.7127	2.051	0.5951	0.6767	0.0061	0.003	0.4579	0.9391	213.358	202.912	187.712	19.0129	20.0703	20.7006	-0.6014	-0.45	0.2998	3.542	3.6856	4.1012	Kirmizi_Pistachio
71106	1445.26	429.529	216.077	0.8643	300.89	0.9589	74153	0.7028	1.9879	0.4278	0.7005	0.006	0.003	0.4907	0.9755	211.863	205.426	187.954	18.1773	18.7152	29.7883	-0.6943	-0.6278	-0.7798	2.8776	2.8748	2.8953	Kirmizi_Pistachio
80087	1251.52	469.378	220.934	0.8823	319.327	0.9657	82929	0.7459	2.1245	0.6425	0.6803	0.0059	0.0028	0.4628	0.9833	229.565	217.59	194.491	23.4298	24.0878	23.1157	-0.9287	-0.8134	-0.497	2.9915	2.8813	2.7362	Kirmizi_Pistachio
52268	1154.15	383.856	197.502	0.8575	257.972	0.8563	61039	0.5628	1.9436	0.4931	0.6721	0.0073	0.0038	0.4517	0.8778	215.491	197.405	181.379	22.2838	23.8369	18.8311	-0.5006	-0.4764	-0.3458	2.2325	2.2164	2.5764	Kirmizi_Pistachio
71693	1463.93	388.237	252.82	0.7589	302.13	0.9156	78304	0.6892	1.5356	0.4204	0.7782	0.0054	0.0035	0.6056	0.93	206.72	192.797	192.78	21.5374	22.4506	23.1916	0.4569	0.7061	0.382	2.6861	3.3963	2.9868	Kirmizi_Pistachio
62240	1898.45	385.724	218.135	0.8247	281.507	0.8947	69563	0.6727	1.7683	0.217	0.7298	0.0062	0.0035	0.5326	0.9418	210.79	194.603	181.719	18.4959	18.8813	19.8073	-0.3596	-0.2957	-0.269	2.586	2.6125	3.1226	Kirmizi_Pistachio
64319	2011.29	435.913	213.759	0.8715	286.17	0.8633	74502	0.6542	2.0393	0.1998	0.6565	0.0068	0.0033	0.431	0.8789	223.414	210.873	198.497	23.9964	25.9236	32.5835	-0.634	-0.4398	-0.5713	2.4145	2.3429	3.2907	Kirmizi_Pistachio
78115	1238.62	492.33	204.999	0.9092	315.371	0.9616	81236	0.7105	2.4016	0.6398	0.6406	0.0063	0.0026	0.4103	0.9855	213.402	200.366	188.903	15.1877	15.2002	16.9397	-1.0709	-0.9604	0.466	4.2805	4.4029	5.785	Kirmizi_Pistachio
69391	1930.62	422.533	223.041	0.8493	297.24	0.8948	77549	0.631	1.8944	0.2339	0.7035	0.0061	0.0032	0.4949	0.9375	225.571	216.673	205.293	28.9465	30.9597	27.7087	-0.7153	-0.6292	-0.6074	2.1826	2.1103	2.1709	Kirmizi_Pistachio
67309	2353.41	451.316	201.348	0.895	292.746	0.8906	75573	0.6887	2.2415	0.1527	0.6487	0.0067	0.003	0.4207	0.9431	200.669	190.148	188.064	17.7353	18.5728	17.9907	-0.3198	-0.3183	-0.4443	2.3792	2.3148	2.3697	Kirmizi_Pistachio
81656	1197.54	458.747	237.312	0.8558	322.44	0.9164	89104	0.7482	1.9331	0.7155	0.7029	0.0056	0.0029	0.494	0.955	235.648	229.925	217.421	23.1077	26.2919	28.9966	-1.1977	-0.996	-0.687	3.4733	3.011	2.5498	Kirmizi_Pistachio
61725	1387.94	432.062	194.688	0.8927	280.34	0.9016	68459	0.671	2.2192	0.4027	0.6488	0.007	0.0032	0.421	0.9343	209.175	196.99	190.669	19.4613	21.9704	25.2491	0.1861	0.3289	0.3571	2.831	2.9414	2.7935	Kirmizi_Pistachio
81583	1295.34	479.062	228.776	0.8786	322.296	0.928	87911	0.6971	2.094	0.611	0.6728	0.0059	0.0028	0.4526	0.9478	217.9	205.667	181.73	20.9465	22.2324	23.4208	-0.3575	-0.2527	-0.0533	2.3909	2.4449	2.9353	Kirmizi_Pistachio
62862	1086.58	431.998	188.404	0.8999	282.911	0.9662	65062	0.7527	2.2929	0.6691	0.6549	0.0069	0.003	0.4289	0.9834	225.351	215.018	197.006	19.0376	20.5178	23.4907	-0.9143	-0.644	-0.5451	3.5481	3.06	2.9253	Kirmizi_Pistachio
84537	1181.15	461.534	235.777	0.8597	328.079	0.9858	85753	0.7674	1.9575	0.7615	0.7108	0.0055	0.0028	0.5053	0.9891	227.74	218.85	205.887	21.5071	21.7216	20.8966	-0.8174	-0.5571	-0.139	3.3539	2.9637	2.654	Kirmizi_Pistachio
89306	1940.19	483.511	249.212	0.8569	337.206	0.9492	94090	0.741	1.9402	0.2981	0.6974	0.0054	0.0028	0.4864	0.9437	233.374	224.89	195.714	22.3919	25.5935	26.6205	-0.98	-0.6158	-0.6159	3.1277	2.4443	2.6435	Kirmizi_Pistachio
70220	1217.23	437.821	214.629	0.8716	299.01	0.9267	75771	0.7174	2.0399	0.5956	0.6829	0.0062	0.0031	0.4664	0.9515	223.197	216.664	199.534	24.9774	26.879	29.7305	-0.3819	-0.3044	-0.6666	2.0673	2.0397	3.9372	Kirmizi_Pistachio
74843	1158.2	432.663	232.637	0.8431	308.696	0.9543	78426	0.7205	1.8598	0.7011	0.7135	0.0058	0.0031	0.5091	0.9467	230.049	218.545	196.97	20.7384	22.433	24.2175	-0.9192	-0.5217	-0.2223	3.4573	2.8285	2.7875	Kirmizi_Pistachio
87771	1319.52	454.604	252.851	0.831	334.296	0.9446	92915	0.7355	1.7979	0.6335	0.7354	0.0052	0.0029	0.5407	0.9722	218.99	206.296	194.395	20.7218	21.5898	21.1319	-0.7997	-0.6571	0.0247	3.0157	2.8284	3.206	Kirmizi_Pistachio
91806	1399.26	460.705	260.789	0.8244	341.893	0.9639	95243	0.7371	1.7666	0.5892	0.7421	0.005	0.0028	0.5507	0.9729	225.077	212.238	197.44	21.2448	20.7639	19.7871	-1.2089	-1.0749	-0.4412	3.7793	3.593	3.614	Kirmizi_Pistachio
63199	1236.67	421.481	196.362	0.8848	283.668	0.9622	65683	0.589	2.1464	0.5193	0.673	0.0067	0.0031	0.453	0.9723	211.918	204.098	202.68	18.8267	19.7538	22.1725	-0.2709	0.0308	0.0961	3.1344	3.1309	2.8418	Kirmizi_Pistachio
74213	1158.46	437.698	224.323	0.8587	307.394	0.9472	78352	0.755	1.9512	0.6949	0.7023	0.0059	0.003	0.4932	0.9624	227.26	216.805	197.888	21.955	22.6716	27.8671	-0.8484	-0.574	-0.5846	3.1144	2.7274	3.7033	Kirmizi_Pistachio
37570	1341.15	344.928	143.174	0.9098	218.714	0.8697	43197	0.6135	2.4092	0.2625	0.6341	0.0092	0.0038	0.4021	0.9686	200.687	195.571	184.066	17.8458	19.2404	18.4744	-0.5886	-0.5648	-0.6013	2.2791	2.2169	2.6701	Kirmizi_Pistachio
77789	1362.2	465.149	217.406	0.8841	314.713	0.9473	82118	0.7536	2.1395	0.5268	0.6766	0.006	0.0028	0.4578	0.9794	225.006	209.42	180.275	25.3248	27.3966	27.6683	-0.6505	-0.4271	-0.2124	2.2584	2.1556	2.0326	Kirmizi_Pistachio
84672	1334.71	489.074	221.948	0.8911	328.341	0.9719	87123	0.7397	2.2035	0.5973	0.6714	0.0058	0.0026	0.4507	0.9932	225.04	217.897	205.051	28.2632	30.3372	27.5822	-0.6172	-0.4561	-0.4167	2.1969	1.8632	1.9638	Kirmizi_Pistachio
58424	1753.01	397.438	192.052	0.8755	272.741	0.9236	63260	0.6785	2.0694	0.2389	0.6862	0.0068	0.0033	0.4709	0.9746	199.16	187.213	171.019	16.8339	16.7388	16.0882	0.1029	0.1826	-0.0295	2.7645	2.9797	3.6958	Kirmizi_Pistachio
93340	1290.41	511.836	235.682	0.8877	344.738	0.971	96123	0.7512	2.1717	0.7044	0.6735	0.0055	0.0025	0.4536	0.9852	228.696	220.367	202.032	24.9579	25.7046	26.6829	-1.0746	-0.8653	-0.7947	3.2581	2.9011	2.7968	Kirmizi_Pistachio
75077	1120.89	458.377	211.572	0.8871	309.178	0.9779	76774	0.7671	2.1665	0.7509	0.6745	0.0061	0.0028	0.455	0.9857	203.247	189.613	167.782	15.9271	16.1165	17.8756	0.2258	0.3356	0.6175	3.3246	3.3108	3.9591	Kirmizi_Pistachio
72345	1368.71	418.417	224.517	0.8438	303.5	0.9387	77070	0.6268	1.8636	0.4853	0.7254	0.0058	0.0031	0.5261	0.9805	205.986	191.157	174.965	17.966	19.8557	24.1313	0.0919	0.5472	0.8493	3.4213	4.1894	4.6525	Kirmizi_Pistachio
78461	1203.48	437.47	232.962	0.8464	316.069	0.9698	80902	0.7554	1.8779	0.6807	0.7225	0.0056	0.003	0.522	0.9802	218.232	207.31	186.986	19.6957	19.9517	20.6927	-0.8413	-0.5184	-0.2935	3.5772	3.3029	3.7136	Kirmizi_Pistachio
76915	1097.15	442.077	224.248	0.8618	312.94	0.9841	78158	0.7652	1.9714	0.8029	0.7079	0.0057	0.0029	0.5011	0.9879	212.261	200.723	185.212	15.5578	15.5805	16.346	-0.8165	-0.6485	-0.1365	3.5345	3.1554	2.8361	Kirmizi_Pistachio
92480	1255.38	500.635	240.093	0.8775	343.146	0.9685	95490	0.7341	2.0852	0.7374	0.6854	0.0054	0.0026	0.4698	0.9796	218.295	205.093	179.975	15.5952	15.2488	14.9603	-0.9309	-0.7434	0.2402	4.1126	3.9093	5.2246	Kirmizi_Pistachio
73059	1628.47	427.791	230.342	0.8427	304.994	0.9194	79460	0.6748	1.8572	0.3462	0.713	0.0059	0.0032	0.5083	0.944	219.852	211.306	192.819	25.1774	25.9284	24.3732	-0.621	-0.5268	-0.3885	2.4261	2.308	2.271	Kirmizi_Pistachio
61791	1528.27	414.724	207.901	0.8653	280.49	0.893	69194	0.6591	1.9948	0.3325	0.6763	0.0067	0.0034	0.4574	0.9125	199.646	194.993	188.746	19.6495	20.09	18.9282	-0.4409	-0.4321	-0.5439	2.0941	2.1019	2.3503	Kirmizi_Pistachio
85157	1363.88	499.38	222.86	0.8949	329.28	0.9562	89054	0.6959	2.2408	0.5753	0.6594	0.0059	0.0026	0.4348	0.9742	223.056	212.314	189.599	25.1832	25.5563	26.0915	-0.8502	-0.8047	-0.751	2.6205	2.476	2.4439	Kirmizi_Pistachio
70770	1384.42	452.045	210.201	0.8853	300.179	0.9106	77716	0.6567	2.1505	0.464	0.664	0.0064	0.003	0.441	0.9483	200.041	183.824	159.056	21.4419	19.8831	16.1355	0.4514	0.5612	0.1499	2.6018	2.8725	3.1142	Kirmizi_Pistachio
47845	949.563	365.478	181.825	0.8675	246.816	0.8916	53660	0.7029	2.0101	0.6668	0.6753	0.0076	0.0038	0.4561	0.9167	213.147	195.35	170.971	24.4043	24.3386	23.0578	-0.4853	-0.4406	-0.3024	2.1714	2.2337	2.4905	Kirmizi_Pistachio
73577	1087.76	428.654	222.831	0.8543	306.074	0.9841	74762	0.7061	1.9237	0.7814	0.714	0.0058	0.003	0.5098	0.9808	218.416	214.819	204.812	26.008	27.0268	25.5985	-0.8739	-0.8287	-0.6949	2.5291	2.4071	2.1968	Kirmizi_Pistachio
84056	1385.1	464.739	237.598	0.8594	327.144	0.9427	89167	0.7534	1.956	0.5506	0.7039	0.0055	0.0028	0.4955	0.9692	202.341	193.043	179.633	20.2187	21.2905	22.0999	-0.2868	-0.2506	0.0076	2.5798	2.4713	2.6831	Kirmizi_Pistachio
62609	1050.49	385.938	208.47	0.8416	282.341	0.9746	64238	0.726	1.8513	0.713	0.7316	0.0062	0.0033	0.5352	0.9908	223.712	219.478	204.152	25.8184	26.7676	27.0931	-0.819	-0.8021	-0.7922	2.7205	2.68	2.6226	Kirmizi_Pistachio
31446	1127.55	360.39	133.51	0.9288	200.096	0.7601	41369	0.4853	2.6994	0.3108	0.5552	0.0115	0.0042	0.3083	0.8321	191.315	177.479	171.131	17.3347	19.473	15.6796	-0.0862	0.0379	0.0182	2.1804	2.192	2.7748	Kirmizi_Pistachio
76194	1344.91	458.804	213.568	0.8851	311.469	0.9694	78600	0.7459	2.1483	0.5293	0.6789	0.006	0.0028	0.4609	0.9901	214.85	201.556	173.159	24.5509	26.2202	33.4298	-0.119	-0.0103	0.0221	2.1865	2.1457	2.6244	Kirmizi_Pistachio
96528	1227.69	503.604	248.743	0.8695	350.576	0.9915	97353	0.7454	2.0246	0.8048	0.6961	0.0052	0.0026	0.4846	0.9811	211.969	202.462	173.894	18.6315	18.6554	20.5713	-0.3775	-0.3697	-0.6632	2.5919	2.6381	3.3746	Kirmizi_Pistachio
79797	1234.7	477.194	215.085	0.8927	318.749	0.9729	82021	0.7636	2.2186	0.6578	0.668	0.006	0.0027	0.4462	0.9899	226.137	217.258	197.519	23.7884	25.2223	25.0782	-0.978	-0.8989	-0.7565	3.1118	2.8756	2.6662	Kirmizi_Pistachio
86028	2224.96	461.793	250.666	0.8399	330.96	0.9155	93967	0.7231	1.8423	0.2184	0.7167	0.0054	0.0029	0.5136	0.9463	215.545	201.623	183.385	25.4078	26.1803	22.7293	-0.3159	-0.2638	-0.4171	2.1288	2.1939	2.4394	Kirmizi_Pistachio
65410	1032.76	412.582	205.11	0.8677	288.587	0.9809	66683	0.7523	2.0115	0.7707	0.6995	0.0063	0.0031	0.4893	0.9841	195.866	181.321	155.547	16.6564	16.4329	16.6507	0.2336	0.2106	0.2803	2.2609	2.1261	2.7129	Kirmizi_Pistachio
65313	1188.03	447.546	188.319	0.9072	288.373	0.9602	68022	0.6756	2.3765	0.5815	0.6443	0.0069	0.0029	0.4152	0.9867	194.736	187.076	175.965	16.6322	16.6657	15.4505	-0.2531	0.1122	0.5144	3.5891	3.7893	4.0499	Kirmizi_Pistachio
50619	1564.62	388.058	246.037	0.7733	253.87	0.6643	76196	0.499	1.5772	0.2598	0.6542	0.0077	0.0049	0.428	0.675	222.953	221.236	205.055	22.365	23.3078	20.5673	-1.0605	-0.9783	-0.7568	3.5701	3.4527	3.9219	Kirmizi_Pistachio
90439	1240.95	492.734	238.339	0.8752	339.338	0.9755	92710	0.7723	2.0674	0.738	0.6887	0.0054	0.0026	0.4743	0.9805	231.909	228.606	211.802	22.5406	23.7834	23.8603	-1.1692	-1.0422	-0.8283	3.91	3.51	2.9709	Kirmizi_Pistachio
92442	1264.1	525.729	224.769	0.904	343.075	0.989	93467	0.7268	2.339	0.727	0.6526	0.0057	0.0024	0.4258	0.9961	226.816	215.429	190.713	20.0414	19.4304	20.3142	-1.2617	-1.2179	-0.8066	4.6502	4.4497	3.439	Kirmizi_Pistachio
93501	1303.6	517.954	231.263	0.8948	345.035	0.9784	95561	0.7334	2.2397	0.6914	0.6662	0.0055	0.0025	0.4438	0.9939	221.126	216.579	204.576	20.9773	22.0968	25.3662	-0.8635	-0.6695	-0.1319	3.4538	3.1398	2.6763	Kirmizi_Pistachio
69088	1402.43	460.5	202.946	0.8977	296.59	0.9128	75684	0.6446	2.2691	0.4414	0.6441	0.0067	0.0029	0.4148	0.9412	201.004	189.506	178.227	19.8133	20.8915	22.4669	-0.2427	-0.2137	-0.3896	2.231	2.3179	2.4591	Kirmizi_Pistachio
64307	1225.94	402.596	220.378	0.8369	286.144	0.8963	71746	0.7242	1.8268	0.5377	0.7107	0.0063	0.0034	0.5052	0.9228	223.102	209.737	182.747	25.9163	26.8251	24.8247	-0.7175	-0.686	-0.5288	2.3808	2.4621	2.4104	Kirmizi_Pistachio
72065	1333.06	414.293	229.828	0.832	302.913	0.938	76825	0.7062	1.8026	0.5096	0.7312	0.0057	0.0032	0.5346	0.9637	211.588	200.994	191.425	23.7244	26.1234	24.8787	-0.2283	-0.2063	0.0274	2.3133	2.3137	2.4353	Kirmizi_Pistachio
57068	1581.25	403.243	183.903	0.8899	269.558	0.933	61167	0.6873	2.1927	0.2868	0.6685	0.0071	0.0032	0.4469	0.9798	206.437	201.685	187.804	20.7138	22.9081	24.2483	-0.6657	-0.5766	-0.5467	2.5999	2.4709	2.5521	Kirmizi_Pistachio
65427	1047.77	421.747	206.785	0.8716	288.625	0.9497	68891	0.654	2.0395	0.7489	0.6844	0.0064	0.0032	0.4683	0.9552	241.275	235.565	215.445	21.5618	24.9651	26.2413	-1.8666	-1.4965	-1.3788	5.9668	4.6259	4.5935	Kirmizi_Pistachio
77050	1725.63	438.907	247.687	0.8256	313.214	0.8931	86274	0.7109	1.772	0.3252	0.7136	0.0057	0.0032	0.5093	0.9024	211.801	206.036	188.716	21.6628	27.2564	28.0423	-0.3805	-0.4121	-0.8543	2.372	2.3317	4.5537	Kirmizi_Pistachio
66535	1659.48	404.52	224.533	0.8318	291.058	0.9149	72723	0.7063	1.8016	0.3036	0.7195	0.0061	0.0034	0.5177	0.9327	218.664	205.975	181.511	23.1153	23.2803	22.2374	-0.6402	-0.5813	-0.5161	2.5287	2.4642	2.6226	Kirmizi_Pistachio
77361	1399.84	441.355	231.381	0.8516	313.846	0.9545	81047	0.6335	1.9075	0.4961	0.7111	0.0057	0.003	0.5057	0.9645	217.759	206.349	189.31	23.0221	24.9661	26.0629	-0.2586	-0.1664	0.0749	2.5265	2.3105	2.276	Kirmizi_Pistachio
66351	1271.31	427.179	204.804	0.8776	290.656	0.9283	71474	0.74	2.0858	0.5159	0.6804	0.0064	0.0031	0.463	0.9656	225.21	218.623	197.696	24.3484	26.2233	27.0083	-0.9928	-0.9611	-0.5956	3.0541	2.9383	2.8272	Kirmizi_Pistachio
71601	2099.22	442.767	216.015	0.8729	301.936	0.8732	82001	0.6963	2.0497	0.2042	0.6819	0.0062	0.003	0.465	0.9532	194.444	184.985	156.793	14.3835	16.053	24.4408	-0.1491	0.0357	0.2249	3.0782	2.7742	2.8133	Kirmizi_Pistachio
90965	2020.76	476.796	251.215	0.8499	340.324	0.9449	96265	0.6642	1.898	0.2799	0.7138	0.0052	0.0028	0.5095	0.967	220.876	210.503	202.348	25.0287	27.8696	24.6164	-0.4756	-0.4759	-0.379	2.2827	2.2546	2.2193	Kirmizi_Pistachio
80126	1643.76	469.259	223.192	0.8796	319.405	0.9537	84017	0.7214	2.1025	0.3727	0.6807	0.0059	0.0028	0.4633	0.9741	223.145	219.282	206.562	26.1513	27.5957	27.9306	-0.6964	-0.6629	-0.6008	2.426	2.3745	2.2641	Kirmizi_Pistachio
62512	995.819	388.371	209.33	0.8423	282.122	0.9629	64918	0.7729	1.8553	0.7922	0.7264	0.0062	0.0033	0.5277	0.979	231.295	228.72	215.86	25.4089	26.3689	26.5161	-1.1523	-1.0813	-0.9142	3.3501	3.2083	2.9598	Kirmizi_Pistachio
70937	1640.01	460.07	207.456	0.8926	300.533	0.8903	79679	0.6278	2.2177	0.3314	0.6532	0.0065	0.0029	0.4267	0.9463	201.183	188.239	177.143	20.1824	21.8364	24.5128	-0.0899	0.0313	0.1911	2.6825	2.7711	2.962	Kirmizi_Pistachio
60803	1317.91	413.886	195.59	0.8813	278.239	0.9106	66769	0.6834	2.1161	0.4399	0.6723	0.0068	0.0032	0.4519	0.9563	218.217	214.476	203.729	22.7933	23.7798	22.8103	-1.011	-0.931	-0.6495	3.2229	3.1221	3.07	Kirmizi_Pistachio
67632	1172.77	450.799	199.78	0.8964	293.448	0.9534	70939	0.68	2.2565	0.6179	0.651	0.0067	0.003	0.4237	0.9562	216.666	203.086	187.186	20.9268	21.2323	18.1066	-0.7308	-0.7743	-1.3064	3.0925	3.1717	4.7187	Kirmizi_Pistachio
73346	1379.82	450.628	211.646	0.8828	305.593	0.9272	79103	0.7214	2.1292	0.4841	0.6781	0.0061	0.0029	0.4599	0.9792	215.529	202.331	178.408	21.6672	23.1048	23.135	-0.7397	-0.6242	-0.5643	2.5686	2.4626	2.6058	Kirmizi_Pistachio
90838	1273.08	485.836	243.637	0.8652	340.086	0.9579	94826	0.7631	1.9941	0.7043	0.7	0.0053	0.0027	0.49	0.9771	234.387	222.939	201.925	25.7879	28.5475	26.0322	-1.2758	-0.9428	-0.8945	3.6799	3.0943	2.9938	Kirmizi_Pistachio
50909	1224.3	376.186	182.745	0.8741	254.596	0.9119	55829	0.6996	2.0585	0.4268	0.6768	0.0074	0.0036	0.458	0.9429	203.567	198.991	193.171	22.0532	24.0621	25.2124	-0.4444	-0.3353	-0.2056	2.2177	2.1388	2.2689	Kirmizi_Pistachio
81491	1124.58	454.887	230.658	0.8619	322.114	0.9895	82357	0.7996	1.9721	0.8097	0.7081	0.0056	0.0028	0.5014	0.9889	222.877	213.31	199.855	16.888	17.9896	19.5425	-1.1852	-0.7547	-0.0599	5.0786	4.0529	3.1483	Kirmizi_Pistachio
78375	1327.23	459.633	222.157	0.8754	315.896	0.9653	81193	0.6961	2.069	0.5591	0.6873	0.0059	0.0028	0.4724	0.9773	218.456	210.144	193.535	24.578	26.4171	28.4643	-0.5302	-0.4102	-0.2805	2.5166	2.3345	2.1471	Kirmizi_Pistachio
88446	1305.2	494.562	233.001	0.8821	335.579	0.9528	92825	0.734	2.1226	0.6524	0.6785	0.0056	0.0026	0.4604	0.9773	219.388	208.428	195.08	22.3299	23.5579	23.0209	-0.8591	-0.837	-0.739	2.9174	2.862	2.8691	Kirmizi_Pistachio
76645	1177.61	443.828	224.656	0.8624	312.39	0.9531	80416	0.7404	1.9756	0.6945	0.7039	0.0058	0.0029	0.4954	0.9787	211.095	197.881	185.027	15.4917	16.2551	16.4886	-0.7568	-0.5415	0.3216	4.4007	4.5554	5.7547	Kirmizi_Pistachio
86335	1204.76	474.897	233.513	0.8708	331.55	0.9882	87363	0.751	2.0337	0.7475	0.6981	0.0055	0.0027	0.4874	0.9913	226.477	212.774	193.659	20.0267	19.2591	18.6172	-1.3238	-1.1728	-0.5252	5.0333	4.6017	3.3911	Kirmizi_Pistachio
50943	1183.61	411.148	162.183	0.9189	254.681	0.9226	55216	0.6845	2.5351	0.457	0.6194	0.0081	0.0032	0.3837	0.9727	206.367	199.231	193.655	23.7973	25.8068	23.5622	-0.2842	-0.1541	-0.0377	2.1345	2.0688	2.2277	Kirmizi_Pistachio
86122	1221.97	484.073	228.619	0.8814	331.14	0.9761	88229	0.731	2.1174	0.7248	0.6841	0.0056	0.0027	0.468	0.9908	226.172	216.155	199.259	22.7148	22.8639	24.4787	-1.0932	-1.0404	-0.5423	3.4617	3.4535	3.0812	Kirmizi_Pistachio
60411	1880.84	425.699	202.738	0.8793	277.34	0.871	69362	0.6852	2.0997	0.2146	0.6515	0.007	0.0034	0.4244	0.8912	227.051	209.39	192.03	27.0257	28.3901	26.2069	-0.706	-0.6287	-0.4767	2.3156	2.3224	2.3194	Kirmizi_Pistachio
81164	1222.93	442.945	242.143	0.8374	321.467	0.9392	86419	0.7543	1.8293	0.682	0.7257	0.0055	0.003	0.5267	0.9635	218.172	205.235	197.995	21.4675	23.0536	23.5558	-0.9706	-0.7575	-0.5712	3.337	3.0248	3.185	Kirmizi_Pistachio
57539	1852.19	415.595	218.656	0.8504	270.668	0.7909	72752	0.6211	1.9007	0.2108	0.6513	0.0072	0.0038	0.4242	0.8062	205.186	193.218	181.483	20.9036	20.9947	18.9361	-0.3635	-0.3427	-0.4945	2.278	2.3152	2.9684	Kirmizi_Pistachio
89516	1381.54	472.127	247.19	0.852	337.602	0.9558	93654	0.7111	1.91	0.5894	0.7151	0.0053	0.0028	0.5113	0.9766	199.328	192.871	180.85	19.1518	20.0045	15.9668	-0.5574	-0.5882	-0.3852	2.4045	2.413	2.7746	Kirmizi_Pistachio
80823	1752.06	455.196	249.032	0.8371	320.791	0.8924	90565	0.6916	1.8279	0.3309	0.7047	0.0056	0.0031	0.4966	0.9078	229.022	220.126	206.942	23.1907	23.2092	19.3852	-1.2634	-1.2613	-1.1857	4.0769	4.0893	3.9978	Kirmizi_Pistachio
63890	1110.25	413.599	200.671	0.8744	285.214	0.9572	66746	0.6584	2.0611	0.6513	0.6896	0.0065	0.0031	0.4755	0.9801	196.149	185.606	177.082	15.3305	16.6151	18.0449	0.0204	0.3628	1.1526	4.0129	4.1913	6.3415	Kirmizi_Pistachio
74065	1380.55	405.432	245.229	0.7963	307.087	0.9041	81920	0.7251	1.6533	0.4883	0.7574	0.0055	0.0033	0.5737	0.9485	216.553	201.724	180.927	26.9356	27.1681	25.6507	-0.286	-0.232	-0.0635	1.9378	1.9539	2.1674	Kirmizi_Pistachio
60324	1851.12	367.964	216.404	0.8088	277.141	0.9038	66748	0.7151	1.7004	0.2212	0.7532	0.0061	0.0036	0.5673	0.9646	212.068	201.695	188.036	23.0372	24.1554	22.63	-0.648	-0.586	-0.4096	2.3925	2.3231	2.5085	Kirmizi_Pistachio
91922	2600.32	510.767	247.976	0.8742	342.109	0.8823	104190	0.6661	2.0597	0.1708	0.6698	0.0056	0.0027	0.4486	0.9241	215.617	204.396	188.308	18.3559	19.5079	19.3669	-0.9507	-0.7775	0.0205	3.735	3.6534	3.8474	Kirmizi_Pistachio
61827	1119.13	425.998	191.703	0.893	280.572	0.9533	64856	0.7133	2.2222	0.6203	0.6586	0.0069	0.0031	0.4338	0.9639	211.833	199.428	187.272	18.7689	20.0027	22.2851	-0.5587	-0.1863	0.5392	3.7453	3.4685	3.6469	Kirmizi_Pistachio
85969	2345.63	421.696	291.115	0.7235	330.846	0.8702	98789	0.7033	1.4486	0.1964	0.7846	0.0049	0.0034	0.6155	0.8916	206.191	193.739	177.709	18.2206	18.1049	16.7189	-0.9762	-0.9983	-0.7881	3.1975	3.3114	3.3104	Kirmizi_Pistachio
82735	1159.4	472.836	228.059	0.876	324.563	0.9833	84136	0.7396	2.0733	0.7735	0.6864	0.0057	0.0028	0.4712	0.9769	227.186	219.128	202.714	23.3855	25.8677	24.5639	-0.5794	-0.2741	-0.4706	2.6509	2.232	2.5639	Kirmizi_Pistachio
68522	1762.67	440.588	210.072	0.879	295.373	0.9141	74961	0.6349	2.0973	0.2771	0.6704	0.0064	0.0031	0.4494	0.9426	196.112	186.986	174.937	19.3695	20.4189	20.5971	-0.0708	0.1029	0.4077	3.0198	3.127	4.2331	Kirmizi_Pistachio
74054	1106.87	419.786	229.353	0.8376	307.064	0.9637	76847	0.7725	1.8303	0.7596	0.7315	0.0057	0.0031	0.5351	0.9793	229.568	220.598	205.928	24.0724	24.6345	25.0684	-1.2336	-1.1648	-0.9235	3.658	3.5321	3.2369	Kirmizi_Pistachio
80574	1205.18	447.165	232.278	0.8545	320.297	0.9749	82648	0.728	1.9251	0.6971	0.7163	0.0055	0.0029	0.5131	0.9877	202.72	191.899	179.409	15.5926	16.221	18.9799	-0.4389	-0.506	0.2204	3.0503	3.4638	3.8518	Kirmizi_Pistachio
71594	1168.07	475.462	193.353	0.9136	301.921	0.981	72982	0.7683	2.459	0.6594	0.635	0.0066	0.0027	0.4032	0.9916	213.975	202.47	188.352	16.3911	16.3513	17.2318	-0.8996	-0.5179	0.2557	4.8467	4.4744	3.9488	Kirmizi_Pistachio
73474	1138.4	439.172	218.962	0.8668	305.859	0.9698	75764	0.7522	2.0057	0.7124	0.6964	0.006	0.003	0.485	0.9728	228.05	216.998	202.571	25.3115	27.2536	25.8601	-0.7742	-0.4143	-0.3446	2.7331	2.4075	2.383	Kirmizi_Pistachio
96086	1397.47	541.966	233.97	0.902	349.772	0.9465	101521	0.666	2.3164	0.6183	0.6454	0.0056	0.0024	0.4165	0.9648	209.45	200.701	192.129	17.0926	18.1147	20.6631	-0.7493	-0.5212	0.1007	3.9649	3.6008	3.388	Kirmizi_Pistachio
96532	1767.67	453.45	282.769	0.7817	350.583	0.9494	101679	0.732	1.6036	0.3882	0.7731	0.0047	0.0029	0.5978	0.9586	225.846	219.315	208.615	26.2251	28.6536	31.5527	-0.7181	-0.5882	-0.3973	2.61	2.3887	2.0214	Kirmizi_Pistachio
91090	1241.65	482.343	244.197	0.8624	340.558	0.9797	92981	0.7762	1.9752	0.7425	0.706	0.0053	0.0027	0.4985	0.9847	229.692	218.681	203.714	22.0349	22.5874	23.0222	-1.2042	-0.9796	-0.448	4.0971	3.7431	3.0547	Kirmizi_Pistachio
83628	1838.77	492.954	230.518	0.8839	326.31	0.9257	90339	0.7383	2.1385	0.3108	0.6619	0.0059	0.0028	0.4382	0.937	217.525	207.007	186.436	26.09	26.49	26.4577	-0.3335	-0.2139	-0.0044	2.0732	2.104	2.1385	Kirmizi_Pistachio
71716	1090.19	418.282	219.996	0.8505	302.178	0.9779	73338	0.7484	1.9013	0.7583	0.7224	0.0058	0.0031	0.5219	0.9923	219.128	212.602	198.921	22.0197	22.9804	23.7043	-0.6516	-0.5435	-0.4521	2.8358	2.5436	2.2575	Kirmizi_Pistachio
89168	1332.23	504.175	230.676	0.8892	336.945	0.9708	91854	0.7519	2.1856	0.6313	0.6683	0.0057	0.0026	0.4466	0.9762	216.175	205.549	193.052	22.1796	21.6274	20.534	-0.6588	-0.6115	-0.2548	3.4279	3.2127	3.4052	Kirmizi_Pistachio
78126	1928.83	456.141	237.134	0.8542	315.394	0.894	87390	0.728	1.9236	0.2639	0.6914	0.0058	0.003	0.4781	0.9196	220.746	212.246	198.213	25.4053	26.4828	25.1724	-0.6998	-0.5847	-0.4111	2.4425	2.3365	2.4541	Kirmizi_Pistachio
53028	1262.9	422.575	164.001	0.9216	259.841	0.9387	56488	0.7212	2.5767	0.4178	0.6149	0.008	0.0031	0.3781	0.9742	205.514	191.763	171.026	17.9237	19.6089	21.3958	-0.4663	-0.2488	-0.2152	2.9667	3.0191	3.2076	Kirmizi_Pistachio
84987	1136.25	462.183	238.254	0.8569	328.951	0.9764	87045	0.7701	1.9399	0.8272	0.7117	0.0054	0.0028	0.5066	0.9827	237.065	233.999	213.345	22.3581	24.2976	22.0071	-1.2508	-1.1731	-0.6381	3.8587	3.7126	2.7077	Kirmizi_Pistachio
80770	1256.71	445.821	238.214	0.8453	320.686	0.9475	85247	0.6878	1.8715	0.6427	0.7193	0.0055	0.0029	0.5174	0.9683	222.368	213.58	202.135	23.7909	25.0251	22.5892	-0.8459	-0.833	-0.6767	2.6396	2.6648	2.5444	Kirmizi_Pistachio
84880	1458.66	475.36	246.466	0.8551	328.744	0.9233	91934	0.706	1.9287	0.5013	0.6916	0.0056	0.0029	0.4783	0.9224	219.37	212.47	202.929	20.5703	23.0201	21.6779	-0.7622	-0.7448	-0.2291	3.6905	3.4721	3.5018	Kirmizi_Pistachio
73254	1967.18	429.62	233.909	0.8388	305.401	0.9119	80327	0.7125	1.8367	0.2379	0.7109	0.0059	0.0032	0.5053	0.9281	222.504	212.533	198.013	25.2897	26.9168	26.7583	-0.6928	-0.5811	-0.5191	2.6485	2.568	2.5095	Kirmizi_Pistachio
84010	1241.55	490.563	221.69	0.8921	327.055	0.9836	85410	0.7595	2.2128	0.6849	0.6667	0.0058	0.0026	0.4445	0.9836	216.717	209.635	199.474	20.6088	19.8558	15.1498	-0.9133	-0.8184	-0.6462	3.3103	3.2056	3.4124	Kirmizi_Pistachio
85018	1274.89	446.826	246.677	0.8338	329.011	0.9632	88270	0.7659	1.8114	0.6573	0.7363	0.0053	0.0029	0.5422	0.9821	233.109	228.579	220.188	26.3296	27.4825	27.9765	-1.3148	-1.1356	-0.8869	3.8935	3.4085	2.8078	Kirmizi_Pistachio
81487	1305.46	479.795	227.478	0.8805	322.106	0.9156	88994	0.709	2.1092	0.6009	0.6713	0.0059	0.0028	0.4507	0.9506	224.57	220.487	206.671	23.7992	25.5841	26.9308	-0.9562	-0.8984	-0.7211	3.1304	3.0416	2.7343	Kirmizi_Pistachio
60009	1132.48	405.317	192.736	0.8797	276.416	0.9553	62815	0.7488	2.103	0.588	0.682	0.0068	0.0032	0.4651	0.9781	211.757	201.415	195.156	21.6153	22.2205	27.1302	-0.7166	-0.6853	-0.6068	2.6035	2.6229	2.5964	Kirmizi_Pistachio
75881	1112.91	445.078	222.89	0.8656	310.829	0.9603	79014	0.7528	1.9969	0.7699	0.6984	0.0059	0.0029	0.4877	0.9739	234.975	233.279	225.948	24.6736	26.2402	26.0744	-1.2069	-1.1857	-0.9589	3.4878	3.4762	2.8939	Kirmizi_Pistachio
63231	1107.59	427.686	192.813	0.8926	283.74	0.9453	66893	0.6484	2.2181	0.6477	0.6634	0.0068	0.003	0.4401	0.9763	207.47	196.233	170.091	19.6149	22.6172	24.5051	0.0848	0.4089	0.3752	2.6197	2.723	2.6142	Kirmizi_Pistachio
73482	2621.37	483.859	253.117	0.8523	305.876	0.7864	93439	0.6051	1.9116	0.1344	0.6322	0.0066	0.0034	0.3996	0.7639	205.522	198.435	174.047	18.4487	19.3414	23.4057	-0.6856	-0.5608	-0.2054	3.2059	3.1713	3.2923	Kirmizi_Pistachio
76715	1163.73	439.613	226.212	0.8574	312.533	0.9817	78143	0.7481	1.9434	0.7119	0.7109	0.0057	0.0029	0.5054	0.9822	220.463	207.814	184.718	21.1586	21.0102	21.6313	-0.6941	-0.4818	-0.3975	3.4168	3.2742	3.2425	Kirmizi_Pistachio
79819	1193.44	448.425	231.018	0.8571	318.793	0.9631	82878	0.7369	1.9411	0.7042	0.7109	0.0056	0.0029	0.5054	0.981	202.635	189.794	169.409	16.0118	17.5188	20.2971	-0.2087	0.2193	0.8454	3.8398	4.0482	5.2269	Kirmizi_Pistachio
69644	1146.14	410.378	223.296	0.839	297.781	0.9356	74435	0.6963	1.8378	0.6662	0.7256	0.0059	0.0032	0.5265	0.9677	209.668	200.976	184.627	20.3077	21.3186	22.491	-0.3479	-0.1704	0.2196	2.74	2.6636	3.3357	Kirmizi_Pistachio
60466	1602.02	377.784	240.411	0.7714	277.467	0.8344	72465	0.6676	1.5714	0.2961	0.7345	0.0062	0.004	0.5394	0.8477	215.861	205.734	189.549	21.5078	23.023	25.5626	-0.5399	-0.2304	-0.0025	2.7422	2.6558	2.7615	Kirmizi_Pistachio
35873	971.085	326.206	143.605	0.8979	213.717	0.9456	37935	0.7731	2.2715	0.478	0.6552	0.0091	0.004	0.4292	0.975	189.453	178.691	170.334	16.1641	16.7325	17.2702	-0.2934	-0.1911	-0.3128	2.1265	2.0699	2.2704	Kirmizi_Pistachio
63966	1790.71	401.213	230.771	0.818	285.384	0.8537	74929	0.6141	1.7386	0.2507	0.7113	0.0063	0.0036	0.506	0.8796	204.142	192.166	172.494	21.8604	22.9962	25.9375	-0.1274	-0.0229	0.0603	2.2317	2.1933	2.3356	Kirmizi_Pistachio
71326	1254.26	458.262	204.63	0.8948	301.355	0.9607	74246	0.6846	2.2395	0.5697	0.6576	0.0064	0.0029	0.4324	0.9684	209.291	201.989	197.258	20.6486	20.8044	20.419	-0.7248	-0.6854	-0.472	2.8786	2.8532	3.3077	Kirmizi_Pistachio
83131	1210.48	440.334	246.573	0.8285	325.339	0.9516	87361	0.7965	1.7858	0.713	0.7388	0.0053	0.003	0.5459	0.9749	222.158	208.655	198.775	25.603	26.7848	25.798	-0.6765	-0.6846	-0.5985	2.4342	2.3727	2.238	Kirmizi_Pistachio
75519	1177.7	448.873	227.941	0.8615	310.087	0.9183	82240	0.6927	1.9693	0.6842	0.6908	0.0059	0.003	0.4772	0.9398	212.57	204.368	189.459	25.0726	26.8529	28.7191	-0.1802	0.0483	0.2007	2.185	2.1699	2.2943	Kirmizi_Pistachio
79537	1439.51	466.797	221.214	0.8806	318.229	0.9437	84281	0.7568	2.1102	0.4823	0.6817	0.0059	0.0028	0.4648	0.9807	204.697	197.909	187.903	21.6117	23.1871	25.4255	-0.5602	-0.4955	-0.2949	2.2785	2.1969	2.5691	Kirmizi_Pistachio
84746	1311.16	482.774	235.904	0.8725	328.484	0.9121	92914	0.7162	2.0465	0.6195	0.6804	0.0057	0.0028	0.463	0.9474	234.01	226.338	209.844	24.899	24.6597	22.5776	-1.4815	-1.4231	-1.2952	4.335	4.2805	4.1503	Kirmizi_Pistachio
80715	1144.97	458.522	228.562	0.8669	320.577	0.9723	83013	0.7613	2.0061	0.7737	0.6992	0.0057	0.0028	0.4888	0.9806	221.156	208.889	180.94	23.5952	23.393	26.0999	-0.867	-0.7582	-0.2637	2.7818	2.8102	2.9265	Kirmizi_Pistachio
77596	1235.54	455.233	225.296	0.8689	314.322	0.9554	81221	0.7448	2.0206	0.6388	0.6905	0.0059	0.0029	0.4767	0.9633	216.233	207.455	187.78	21.1633	21.9773	22.754	-1.0836	-0.9881	-0.8232	3.4403	3.2519	3.2279	Kirmizi_Pistachio
83019	1180.43	482.441	221.132	0.8888	325.12	0.9828	84468	0.75	2.1817	0.7487	0.6739	0.0058	0.0027	0.4542	0.9908	203.514	191.203	175.115	20.3839	21.922	20.4829	0.074	0.1886	0.3229	2.2967	2.2882	2.8709	Kirmizi_Pistachio
66035	2038.51	435.733	207.5	0.8793	289.963	0.8606	76729	0.6566	2.0999	0.1997	0.6655	0.0066	0.0031	0.4428	0.9299	202.968	195.678	179.451	18.4829	19.1021	20.7004	-0.7156	-0.5906	-0.2231	2.878	2.7892	3.8936	Kirmizi_Pistachio
64036	1162.11	415.755	205.701	0.869	285.54	0.9208	69546	0.6947	2.0212	0.5959	0.6868	0.0065	0.0032	0.4717	0.9534	196.592	182.077	163.522	19.0061	21.1301	23.9175	0.5599	0.663	0.7574	2.8995	2.6681	2.7631	Kirmizi_Pistachio
49216	1063.02	388.588	164.713	0.9057	250.327	0.9444	52114	0.7365	2.3592	0.5473	0.6442	0.0079	0.0033	0.415	0.979	197.003	184.314	170.517	22.226	23.2451	21.4433	-0.2591	-0.2537	-0.2704	1.7139	1.7178	1.7985	Kirmizi_Pistachio
75982	1171.05	469.321	208.438	0.896	311.036	0.9832	77284	0.7004	2.2516	0.6963	0.6627	0.0062	0.0027	0.4392	0.9889	203.061	194.54	176.869	17.3535	18.7902	21.7423	-0.5195	-0.0187	0.662	3.5554	3.156	3.6438	Kirmizi_Pistachio
76680	1383.63	442.873	223.749	0.863	312.461	0.9624	79672	0.7533	1.9793	0.5033	0.7055	0.0058	0.0029	0.4978	0.9853	219.708	214.21	198.293	24.8892	25.7525	25.7118	-1.0571	-0.9198	-0.7611	3.1485	2.8976	2.5069	Kirmizi_Pistachio
90014	1207.86	498.039	231.484	0.8854	338.54	0.991	90832	0.7498	2.1515	0.7753	0.6797	0.0055	0.0026	0.4621	0.9941	225.919	217.726	193.506	21.4632	19.9156	17.4867	-1.4589	-1.5128	-0.7969	4.9061	5.0371	3.7463	Kirmizi_Pistachio
75639	1164.82	473.658	203.873	0.9026	310.333	0.9846	76819	0.7991	2.3233	0.7005	0.6552	0.0063	0.0027	0.4293	0.9973	212.313	201.459	187.616	23.8009	24.1758	23.4319	-0.5966	-0.4881	-0.386	2.3474	2.2543	2.1467	Kirmizi_Pistachio
47569	1441.63	368.142	180.441	0.8716	246.103	0.8518	55844	0.6452	2.0402	0.2876	0.6685	0.0077	0.0038	0.4469	0.9118	199.925	189.273	179.971	20.8538	22.4746	18.5619	-0.5657	-0.6023	-0.6286	2.1542	2.1813	2.5498	Kirmizi_Pistachio
66817	1267.01	462.072	192.532	0.9091	291.675	0.9166	72895	0.6172	2.4	0.523	0.6312	0.0069	0.0029	0.3985	0.9563	200.383	190.223	174.382	19.655	21.8781	24.446	-0.4245	-0.2358	-0.4274	2.3271	2.1926	2.4213	Kirmizi_Pistachio
43091	1025.48	414.375	134.283	0.946	234.233	0.9605	44865	0.7672	3.0858	0.5149	0.5653	0.0096	0.0031	0.3195	0.986	184.551	173.443	164.332	14.1836	14.1539	12.8368	-0.4452	-0.3709	-0.443	2.1649	2.1394	2.3595	Kirmizi_Pistachio
41435	1103.1	320.344	172.605	0.8424	229.688	0.9236	44863	0.7345	1.8559	0.4279	0.717	0.0077	0.0042	0.5141	0.9541	201.01	188.895	167.828	16.9207	16.7375	14.496	-0.9042	-0.8114	-0.3827	3.0736	2.9276	2.5795	Kirmizi_Pistachio
64467	1253.81	411.698	218.935	0.8469	286.5	0.8878	72618	0.6585	1.8805	0.5153	0.6959	0.0064	0.0034	0.4843	0.9107	198.211	184.933	172.804	16.7196	17.8809	15.4727	-0.5806	-0.5035	0.0367	2.5952	2.4579	3.3445	Kirmizi_Pistachio
80709	1212.32	482.352	216.214	0.8939	320.565	0.9785	82486	0.7768	2.2309	0.6901	0.6646	0.006	0.0027	0.4417	0.9853	218.348	210.141	196.456	25.0301	26.5612	26.0852	-0.727	-0.6324	-0.3677	2.6649	2.5216	2.5631	Kirmizi_Pistachio
40127	858.363	334.933	156.119	0.8847	226.034	0.9718	41290	0.7464	2.1454	0.6844	0.6749	0.0083	0.0039	0.4554	0.9771	183.608	171.654	163.22	13.998	14.3753	14.1624	0.2207	0.3437	0.3963	2.2562	2.3057	3.1727	Kirmizi_Pistachio
69391	1529.82	408.823	259.466	0.7728	297.24	0.8587	80807	0.6959	1.5756	0.3726	0.7271	0.0059	0.0037	0.5286	0.8329	202.799	189.535	171.528	22.1201	24.4422	21.0314	-0.3323	-0.2852	-0.2426	2.067	2.163	2.3999	Kirmizi_Pistachio
90235	1236.27	485.864	237.386	0.8725	338.955	0.9844	91662	0.772	2.0467	0.7419	0.6976	0.0054	0.0026	0.4867	0.9961	209.478	197.838	182.821	17.7458	17.7984	18.658	-0.7282	-0.6507	-0.4272	3.6646	3.4569	3.6925	Kirmizi_Pistachio
79538	1222.44	465.543	225.982	0.8743	318.231	0.9577	83048	0.7045	2.0601	0.6688	0.6836	0.0059	0.0028	0.4673	0.9626	207.878	193.587	174.438	19.5675	20.0099	20.9932	-0.7816	-0.7357	-0.7229	2.5508	2.4753	2.6176	Kirmizi_Pistachio
64717	1026.03	416.624	198.404	0.8793	287.054	0.9875	65539	0.7701	2.0999	0.7725	0.689	0.0064	0.0031	0.4747	0.9969	214.692	206.48	194.873	23.0398	23.2275	25.0282	-0.6902	-0.5967	-0.2892	2.8883	2.6978	2.4418	Kirmizi_Pistachio
60483	1258.1	404.131	194.357	0.8768	277.506	0.9469	63874	0.751	2.0793	0.4802	0.6867	0.0067	0.0032	0.4715	0.9804	208.469	198.496	185.552	25.9287	26.9464	26.5597	-0.3306	-0.2051	-0.219	2.0609	1.9369	2.0658	Kirmizi_Pistachio
75774	1246.74	471.527	209.407	0.896	310.61	0.9534	79477	0.7284	2.2517	0.6126	0.6587	0.0062	0.0028	0.4339	0.9771	217.201	207.761	185.126	24.6228	26.5009	24.2508	-0.6805	-0.6371	-0.4611	2.6333	2.646	2.7431	Kirmizi_Pistachio
66992	1071.29	427.463	202.331	0.8809	292.056	0.9793	68406	0.747	2.1127	0.7335	0.6832	0.0064	0.003	0.4668	0.9862	218.631	205.535	185.658	23.755	25.8462	27.1064	-0.765	-0.4122	-0.2423	2.8191	2.6724	2.5888	Kirmizi_Pistachio
96118	1282.01	502.724	246.453	0.8716	349.83	0.9854	97545	0.7479	2.0398	0.7349	0.6959	0.0052	0.0026	0.4842	0.9878	216.655	206.828	187.887	21.1023	22.2	23.903	-0.5954	-0.3684	-0.1386	2.9441	2.3966	2.0707	Kirmizi_Pistachio
79642	1144.6	463.95	221.345	0.8789	318.439	0.9902	80431	0.7782	2.096	0.7639	0.6864	0.0058	0.0028	0.4711	0.9874	217.069	210.006	189.486	23.4901	25.641	26.6423	-0.7871	-0.5287	-0.3032	2.6744	2.2202	1.9222	Kirmizi_Pistachio
78285	1169.64	465.071	218.781	0.8824	315.714	0.9741	80368	0.6502	2.1257	0.7191	0.6789	0.0059	0.0028	0.4608	0.9796	229.564	220.601	206.181	24.4884	25.1785	20.7357	-1.2026	-1.1474	-0.5694	3.6865	3.6682	2.8032	Kirmizi_Pistachio
64753	1081.66	422.242	199.847	0.8809	287.134	0.9768	66292	0.7858	2.1128	0.6955	0.68	0.0065	0.0031	0.4624	0.977	233.604	218.561	187.047	25.3753	24.3635	21.3576	-1.2815	-1.1453	-0.7338	3.8375	3.6475	2.8954	Kirmizi_Pistachio
83333	1146.98	457.763	233.078	0.8607	325.734	0.989	84260	0.8123	1.964	0.796	0.7116	0.0055	0.0028	0.5063	0.9945	235.531	234.34	226.635	27.6626	28.6142	27.1125	-1.5912	-1.4832	-1.1706	4.5594	4.1743	3.4032	Kirmizi_Pistachio
74490	1116.39	439.926	218.446	0.868	307.967	0.9898	75261	0.7523	2.0139	0.7511	0.7	0.0059	0.0029	0.4901	0.9869	218.436	220.858	219.384	21.5332	22.5876	22.5208	-1.2306	-1.0065	-0.6469	4.2257	3.6743	2.9256	Kirmizi_Pistachio
78544	1281.41	455.549	228.983	0.8645	316.236	0.9499	82685	0.7441	1.9894	0.6011	0.6942	0.0058	0.0029	0.4819	0.9587	222.209	214.242	192.64	22.3924	24.1539	21.6809	-0.8335	-0.6215	-0.3717	3.566	3.0969	2.8161	Kirmizi_Pistachio
82130	1169.22	466.517	230.638	0.8692	323.375	0.9712	84565	0.778	2.0227	0.755	0.6932	0.0057	0.0028	0.4805	0.9719	230.807	226.481	206.374	25.5313	27.2887	24.4347	-1.1324	-0.9769	-0.8925	3.5442	3.2348	3.2868	Kirmizi_Pistachio
75582	1175.75	461.392	215.483	0.8842	310.216	0.9547	79172	0.7161	2.1412	0.6871	0.6723	0.0061	0.0029	0.4521	0.9679	216.237	213.765	199.299	26.862	28.9681	28.8433	-0.471	-0.4094	-0.3239	2.348	2.2477	2.1045	Kirmizi_Pistachio
67777	1451.34	435.902	210.132	0.8761	293.762	0.9021	75136	0.5933	2.0744	0.4043	0.6739	0.0064	0.0031	0.4542	0.9421	215.532	201.088	184.225	23.61	24.3433	24.0623	-0.4425	-0.4406	-0.3986	2.5068	2.5468	2.8837	Kirmizi_Pistachio
66313	1870.75	403.205	252.393	0.7798	290.572	0.8138	81481	0.6049	1.5975	0.2381	0.7207	0.0061	0.0038	0.5193	0.8297	215.097	202.757	182.9	23.7711	24.2763	22.0889	-0.6279	-0.6356	-0.522	2.3005	2.3671	2.3174	Kirmizi_Pistachio
77399	1586.88	434.946	233.317	0.8439	313.923	0.9465	81776	0.7448	1.8642	0.3862	0.7218	0.0056	0.003	0.5209	0.9711	210.024	201.598	186.498	25.3766	26.4017	26.1296	-0.2902	-0.2139	0.0383	2.2245	2.1743	2.1898	Kirmizi_Pistachio
66494	1084.08	421.892	205.802	0.873	290.969	0.9686	68650	0.7162	2.05	0.711	0.6897	0.0063	0.0031	0.4757	0.9751	216.424	208.361	189.957	24.571	25.9356	25.2811	-0.7502	-0.6688	-0.5133	2.6611	2.4811	2.284	Kirmizi_Pistachio
78060	1251.82	470.181	226.182	0.8767	315.26	0.9347	83510	0.6835	2.0788	0.626	0.6705	0.006	0.0029	0.4496	0.9346	208.479	195.472	180.757	18.2244	19.495	20.3053	-0.9805	-0.7895	-0.6068	3.3999	3.0253	3.3277	Kirmizi_Pistachio
79341	1286.04	490.018	216.356	0.8972	317.837	0.9557	83022	0.6746	2.2649	0.6028	0.6486	0.0062	0.0027	0.4207	0.9529	217.679	209.9	194.506	17.5802	17.9444	17.7091	-1.4978	-1.3221	-0.3348	5.7911	5.4374	4.9163	Kirmizi_Pistachio
77609	1185.84	432.551	242.595	0.8279	314.348	0.8959	86626	0.7368	1.783	0.6935	0.7267	0.0056	0.0031	0.5281	0.9417	226.021	214.173	196.757	25.9165	28.1711	30.951	-0.7996	-0.7021	-0.612	2.648	2.4809	2.3122	Kirmizi_Pistachio
89531	1201.97	475.715	244.366	0.858	337.631	0.9867	90741	0.7646	1.9467	0.7787	0.7097	0.0053	0.0027	0.5037	0.9806	206.422	196.143	178.537	18.3809	19.0079	18.5169	-0.6934	-0.5449	-0.344	2.8006	2.4237	2.1716	Kirmizi_Pistachio
73388	1283.76	418.133	230.853	0.8338	305.68	0.9543	76901	0.7177	1.8113	0.5596	0.7311	0.0057	0.0031	0.5344	0.968	203.33	191.824	178.355	18.8764	20.4431	25.4281	-0.2694	-0.0023	0.1468	3.1753	3.1805	3.1602	Kirmizi_Pistachio
71029	1069.98	434.816	211.633	0.8736	300.727	0.9911	71666	0.7686	2.0546	0.7796	0.6916	0.0061	0.003	0.4783	0.9828	208.785	199.71	191.915	17.1028	18.5356	21.4467	-0.4306	0.1822	0.6539	4.2604	3.4493	3.1451	Kirmizi_Pistachio
65251	1139.38	419.942	201.608	0.8772	288.236	0.9641	67679	0.7619	2.083	0.6316	0.6864	0.0064	0.0031	0.4711	0.9813	218.845	210.586	198.888	24.0821	25.237	25.4899	-0.7907	-0.5841	-0.4852	2.795	2.6935	2.5871	Kirmizi_Pistachio
85324	1188.88	451.224	249.853	0.8327	329.603	0.9449	90301	0.751	1.806	0.7586	0.7305	0.0053	0.0029	0.5336	0.9636	237.954	232.42	211.82	23.2724	26.982	26.6957	-1.5466	-1.2669	-0.6968	4.806	4.0721	2.4317	Kirmizi_Pistachio
76016	1107.25	461.591	210.859	0.8896	311.105	0.9892	76849	0.7968	2.1891	0.7792	0.674	0.0061	0.0028	0.4543	0.9944	238.605	224.772	201.916	19.3306	17.8138	16.513	-1.9316	-1.6403	-0.9678	7.1282	6.9013	4.7881	Kirmizi_Pistachio
53718	1865.59	404.98	213.72	0.8494	261.526	0.7779	69055	0.6122	1.8949	0.194	0.6458	0.0075	0.004	0.417	0.7902	210.416	197.953	183.004	22.7602	22.7911	19.324	-0.5956	-0.6122	-0.2761	2.371	2.4991	2.4538	Kirmizi_Pistachio
64511	1050.39	424.769	196.504	0.8866	286.597	0.9743	66212	0.7521	2.1616	0.7348	0.6747	0.0066	0.003	0.4552	0.9841	214.057	199.725	176.119	21.5533	21.6109	19.6791	-0.6356	-0.4949	-0.3219	2.7292	2.4813	2.3259	Kirmizi_Pistachio
65727	1125.89	391.741	218.362	0.8302	289.286	0.9686	67857	0.6987	1.794	0.6516	0.7385	0.006	0.0033	0.5453	0.9783	196.222	186.279	176.144	17.7973	18.5397	21.9392	-0.1492	-0.1207	-0.1655	2.2546	2.3494	2.4815	Kirmizi_Pistachio
78993	1217.46	453.087	236.647	0.8528	317.139	0.9219	85685	0.6853	1.9146	0.6697	0.7	0.0057	0.003	0.4899	0.938	220.102	212.346	199.255	27.4514	30.6533	31.9937	-0.6034	-0.5681	-0.4568	2.2715	2.216	2.095	Kirmizi_Pistachio
63091	1058.69	412.692	199.569	0.8753	283.425	0.9611	65645	0.762	2.0679	0.7074	0.6868	0.0065	0.0032	0.4717	0.9753	216.626	207.392	188.959	24.4382	25.9061	24.4436	-0.6855	-0.6071	-0.6141	2.3428	2.2437	2.2612	Kirmizi_Pistachio
96045	1219.26	490.952	249.556	0.8612	349.697	0.9919	96827	0.7379	1.9673	0.8119	0.7123	0.0051	0.0026	0.5073	0.9981	227.078	215.68	191.537	20.6094	19.5162	14.9372	-0.9803	-0.9135	-0.7412	3.6991	3.3794	3.6745	Kirmizi_Pistachio
78693	1198.94	479.975	211.056	0.8981	316.536	0.9751	80701	0.7494	2.2742	0.6879	0.6595	0.0061	0.0027	0.4349	0.9891	200.831	188.17	165.943	13.8259	14.5092	18.6125	-0.8675	-0.5021	0.3151	3.8367	3.8395	4.3204	Kirmizi_Pistachio
72615	1225.48	447.406	208.881	0.8843	304.066	0.9674	75059	0.6946	2.1419	0.6076	0.6796	0.0062	0.0029	0.4619	0.9893	215.314	205.467	189.43	22.0466	21.5387	19.3166	-0.8485	-0.8861	-1.0905	3.0056	3.1143	3.8237	Kirmizi_Pistachio
65779	1267.32	432.024	203.246	0.8824	289.4	0.9351	70345	0.7041	2.1256	0.5147	0.6699	0.0066	0.0031	0.4487	0.9538	196.411	182.493	163.042	17.613	18.4306	18.566	-0.4152	-0.3889	-0.3997	2.0629	2.1271	2.6246	Kirmizi_Pistachio
65688	1333.7	394.94	216.554	0.8363	289.2	0.9664	67970	0.7766	1.8238	0.4641	0.7323	0.006	0.0033	0.5362	0.9779	207.228	197.906	185.038	17.476	18.6701	18.6132	-0.9615	-0.8268	-0.3432	3.4524	3.2206	2.9795	Kirmizi_Pistachio
65159	1111.23	430.583	194.441	0.8922	288.033	0.9706	67136	0.7005	2.2145	0.6631	0.6689	0.0066	0.003	0.4475	0.9909	200.677	192.492	181.457	20.9476	21.9754	20.743	-0.5541	-0.4461	-0.2764	2.4294	2.4292	2.3163	Kirmizi_Pistachio
76885	1219.31	456.002	225.51	0.8692	312.879	0.9461	81269	0.7206	2.0221	0.6499	0.6861	0.0059	0.0029	0.4708	0.952	220.493	210.858	195.038	23.9765	24.5824	22.487	-0.8299	-0.7566	-0.6983	2.9004	2.8072	2.8598	Kirmizi_Pistachio
73912	1415.2	455.94	219.936	0.876	306.77	0.9207	80276	0.7301	2.0731	0.4638	0.6728	0.0062	0.003	0.4527	0.9385	205.352	188.319	154.858	18.506	19.0246	21.6115	-0.1907	0.1664	0.5717	3.0984	3.0137	3.1412	Kirmizi_Pistachio
57830	1058.76	350.255	216.834	0.7853	271.351	0.9534	60657	0.7305	1.6153	0.6483	0.7747	0.0061	0.0037	0.6002	0.9695	192.762	181.966	168.348	14.701	16.2683	19.4464	0.1421	0.5219	1.2869	4.0174	4.4334	5.7887	Kirmizi_Pistachio
59753	1733.89	418.077	193.169	0.8869	275.826	0.8756	68239	0.6377	2.1643	0.2498	0.6597	0.007	0.0032	0.4353	0.9421	197.658	189.01	179.173	20.8002	21.7813	22.4656	-0.2454	-0.2596	-0.442	2.0256	2.0847	2.4193	Kirmizi_Pistachio
44350	1077.98	359.904	162.523	0.8922	237.63	0.9423	47065	0.6157	2.2145	0.4796	0.6603	0.0081	0.0037	0.4359	0.9654	202.491	188.783	174.33	15.7934	16.0518	15.2178	-0.5025	-0.3528	0.2876	3.6049	3.5272	3.6224	Kirmizi_Pistachio
64813	1085.75	413.125	206.511	0.8661	287.267	0.9595	67551	0.6906	2.0005	0.6909	0.6954	0.0064	0.0032	0.4835	0.9673	215.813	201.574	175.08	24.2199	23.7115	22.6702	-0.6046	-0.577	-0.4724	2.4634	2.4592	2.6682	Kirmizi_Pistachio
87582	2388.78	453.043	272.215	0.7994	333.935	0.8805	99467	0.6843	1.6643	0.1929	0.7371	0.0052	0.0031	0.5433	0.9042	210.332	199.231	189.457	20.7716	22.399	22.5691	-0.7524	-0.74	-0.5742	2.6495	2.7052	2.9665	Kirmizi_Pistachio
55916	1646.8	367.609	207.533	0.8254	266.823	0.894	62543	0.6959	1.7713	0.2591	0.7258	0.0066	0.0037	0.5268	0.9332	216.613	204.586	203.351	26.004	26.6277	27.4316	-0.4252	-0.2568	-0.2039	2.18	2.169	2.0189	Kirmizi_Pistachio
76819	1230.55	479.875	207.406	0.9018	312.744	0.9749	78795	0.7633	2.3137	0.6375	0.6517	0.0062	0.0027	0.4247	0.9827	228.549	217.413	195.155	23.9753	24.5478	24.7271	-1.2678	-1.0746	-0.8112	3.8292	3.3124	2.8062	Kirmizi_Pistachio
65433	1101.1	421.855	202.014	0.8779	288.638	0.9746	67137	0.7526	2.0882	0.6782	0.6842	0.0064	0.0031	0.4681	0.9776	215.146	205.662	190.483	23.0975	24.8805	26.3454	-0.6214	-0.4858	-0.4392	2.5303	2.2815	2.2554	Kirmizi_Pistachio
79828	1243.63	493.138	217.358	0.8976	318.81	0.9432	84633	0.6945	2.2688	0.6486	0.6465	0.0062	0.0027	0.418	0.9482	225.647	211.911	189.842	22.9331	25.7288	28.6638	-0.7667	-0.2593	0.3243	3.1813	2.8203	2.8035	Kirmizi_Pistachio
86019	1395.73	499.544	225.184	0.8926	330.942	0.9473	90802	0.705	2.2184	0.5549	0.6625	0.0058	0.0026	0.4389	0.9736	210.138	197.857	191.201	20.337	20.9411	22.0923	-0.7995	-0.7789	-0.6753	2.8909	2.8802	2.8979	Kirmizi_Pistachio
56408	1140.97	373.937	195.383	0.8526	267.994	0.9551	59058	0.7379	1.9139	0.5445	0.7167	0.0066	0.0035	0.5136	0.983	207.822	194.839	170.958	25.4436	26.9896	27.6453	-0.2077	-0.111	0.0869	1.9714	1.9889	2.222	Kirmizi_Pistachio
88717	1210.56	487.428	235.463	0.8756	336.092	0.9849	90077	0.7594	2.0701	0.7608	0.6895	0.0055	0.0027	0.4754	0.9842	232.37	217.599	194.408	25.1742	24.2829	21.5213	-1.2432	-1.1107	-0.7874	3.626	3.3161	2.8511	Kirmizi_Pistachio
75986	1169.89	457.527	214.864	0.8829	311.044	0.9875	76944	0.7895	2.1294	0.6977	0.6798	0.006	0.0028	0.4622	0.9842	239.882	237.008	220.237	22.2742	23.9573	24.8562	-1.5979	-1.4139	-0.9652	4.7823	4.1641	3.043	Kirmizi_Pistachio
81393	1362.13	476.551	220.65	0.8864	321.921	0.9602	84766	0.7607	2.1598	0.5513	0.6755	0.0059	0.0027	0.4563	0.9856	223.785	215.849	196.818	22.3298	23.1417	21.1533	-0.9345	-0.8359	-0.8816	3.2852	3.2135	3.2889	Kirmizi_Pistachio
68731	1162.82	428.436	212.254	0.8687	295.823	0.9391	73191	0.7417	2.0185	0.6388	0.6905	0.0062	0.0031	0.4767	0.9623	221.66	206.51	183.975	26.8529	28.3617	27.4914	-0.5236	-0.4512	-0.282	2.1457	2.1456	2.3462	Kirmizi_Pistachio
65874	1700.93	442.388	210.566	0.8795	289.609	0.8907	73961	0.7165	2.101	0.2861	0.6546	0.0067	0.0032	0.4286	0.9004	222.697	215.708	196.485	25.2135	26.7851	26.8374	-0.8116	-0.7447	-0.5696	2.7527	2.6221	2.3447	Kirmizi_Pistachio
74193	1730.05	431.564	230.929	0.8448	307.352	0.9244	80264	0.7457	1.8688	0.3115	0.7122	0.0058	0.0031	0.5072	0.9479	221.91	212.444	210.407	24.5919	26.4989	26.3136	-0.9228	-0.8824	-0.6271	2.9707	2.9272	2.5436	Kirmizi_Pistachio
79401	2197.68	441.5	259.643	0.8088	317.957	0.8703	91233	0.6503	1.7004	0.2066	0.7202	0.0056	0.0033	0.5186	0.8819	221.641	208.918	189.913	27.1855	28.7291	26.3835	-0.5142	-0.2831	-0.3058	2.3022	2.2754	2.4691	Kirmizi_Pistachio
80207	1190.36	485.805	216.218	0.8955	319.567	0.9609	83471	0.7231	2.2468	0.7113	0.6578	0.0061	0.0027	0.4327	0.9722	230.842	226.5	203.775	22.8186	24.4223	25.2418	-0.9624	-0.8879	-0.4987	3.2527	3.0163	3.142	Kirmizi_Pistachio
77857	1443.45	455.64	231.106	0.8618	314.85	0.9243	84235	0.7046	1.9716	0.4696	0.691	0.0059	0.003	0.4775	0.9414	211.827	198.429	202.917	22.8838	27.0857	26.1311	0.0291	0.4016	0.0537	2.5574	2.463	2.5718	Kirmizi_Pistachio
66621	1832.54	434.488	201.942	0.8854	291.247	0.9169	72655	0.7124	2.1515	0.2493	0.6703	0.0065	0.003	0.4493	0.9668	195.984	191.165	189.76	17.9773	18.0423	17.678	-0.4095	-0.3412	-0.2655	2.7048	2.669	3.3441	Kirmizi_Pistachio
73740	2042.68	424.248	254.188	0.8006	306.413	0.8627	85475	0.6777	1.669	0.2221	0.7222	0.0058	0.0034	0.5216	0.8706	216.338	213.105	203.472	21.5535	22.4065	21.2709	-0.9782	-0.7996	-0.3511	3.506	3.2253	3.3232	Kirmizi_Pistachio
82481	1272.87	502.674	213.099	0.9057	324.065	0.9662	85367	0.794	2.3589	0.6397	0.6447	0.0061	0.0026	0.4156	0.9804	208.715	200.217	189.79	17.9124	18.549	21.2309	-0.326	-0.1138	0.4452	3.3992	3.4447	3.7506	Kirmizi_Pistachio
67866	1090.77	426.577	206.257	0.8753	293.955	0.9765	69499	0.7316	2.0682	0.7168	0.6891	0.0063	0.003	0.4749	0.9821	217.803	207.395	189.345	20.7991	20.9665	22.695	-1.1109	-0.9428	-0.6996	3.8755	3.7073	3.9473	Kirmizi_Pistachio
67026	1212.55	441.681	195.773	0.8964	292.13	0.962	69677	0.6848	2.2561	0.5729	0.6614	0.0066	0.0029	0.4375	0.9869	203.451	193.597	185.632	18.9752	20.6802	23.0565	-0.112	-0.1496	-0.4504	3.3775	3.5831	4.1529	Kirmizi_Pistachio
82467	1271	456.602	235.587	0.8566	324.037	0.9763	84472	0.6708	1.9381	0.6415	0.7097	0.0055	0.0029	0.5036	0.9761	213.792	207.829	198.674	20.114	21.5006	22.5781	-0.2942	-0.2375	-0.081	2.7489	2.7115	2.7948	Kirmizi_Pistachio
84260	1306.09	506.466	213.442	0.9069	327.541	0.9786	86101	0.7746	2.3729	0.6207	0.6467	0.006	0.0025	0.4182	0.9924	224.77	221.808	208.455	27.3671	29.3792	30.5724	-0.8537	-0.7276	-0.4149	2.6791	2.4244	2.1333	Kirmizi_Pistachio
89455	1303.65	484.801	242.744	0.8656	337.487	0.9464	94521	0.7049	1.9972	0.6614	0.6961	0.0054	0.0027	0.4846	0.9678	221.235	215.484	200.606	24.6409	27.3414	27.206	-0.5123	-0.4464	-0.3456	2.4711	2.3801	2.5668	Kirmizi_Pistachio
69085	1648.75	438.168	209.306	0.8785	296.584	0.9394	73545	0.7285	2.0934	0.3194	0.6769	0.0063	0.003	0.4582	0.9591	227.918	223.951	202.737	26.2683	27.3741	27.1581	-1.0415	-0.9624	-0.7978	3.0969	2.9064	2.7188	Kirmizi_Pistachio
84641	1271.93	497.634	220.011	0.897	328.281	0.9694	87311	0.7538	2.2619	0.6575	0.6597	0.0059	0.0026	0.4352	0.9843	213.363	203.086	190.455	17.5892	18.9128	23.7881	-0.9415	-0.7537	-0.3653	4.1016	3.6671	3.5907	Kirmizi_Pistachio
78972	1250.76	486.535	210.968	0.9011	317.097	0.9651	81826	0.6427	2.3062	0.6344	0.6517	0.0062	0.0027	0.4248	0.9796	207.973	198.868	184.649	17.9461	18.6059	21.9952	-0.5072	-0.3717	-0.3358	3.2029	2.9583	2.7061	Kirmizi_Pistachio
87888	1424.31	468.68	245.918	0.8513	334.518	0.9435	93149	0.6612	1.9058	0.5444	0.7137	0.0053	0.0028	0.5094	0.9709	205.825	197.088	187.697	22.6019	23.4088	24.5167	-0.3454	-0.3284	-0.1222	2.6475	2.5942	2.7041	Kirmizi_Pistachio
77101	1346.67	452.654	220.811	0.8729	313.318	0.9524	80957	0.729	2.05	0.5343	0.6922	0.0059	0.0029	0.4791	0.9822	190.464	180.702	169.25	15.5346	15.7527	16.5375	-0.1421	0.0095	0.4552	2.8421	2.8239	4.063	Kirmizi_Pistachio
61938	2001.85	425.635	204.775	0.8767	280.824	0.871	71112	0.6287	2.0786	0.1942	0.6598	0.0069	0.0033	0.4353	0.9048	207.294	198.832	180.819	24.2831	25.339	25.1896	-0.477	-0.2954	0.083	2.3208	2.3005	2.5915	Kirmizi_Pistachio
75506	1160.34	454.059	215.148	0.8806	310.06	0.966	78167	0.7375	2.1105	0.7047	0.6829	0.006	0.0028	0.4663	0.9841	215.435	205.488	203.582	22.2203	23.0598	24.4902	-0.9039	-0.8227	-0.7298	2.8759	2.7756	2.5943	Kirmizi_Pistachio
29879	1874.97	360.245	157.399	0.8995	195.047	0.6598	45283	0.4768	2.2887	0.1068	0.5414	0.0121	0.0053	0.2931	0.6709	167.191	163.483	180.082	16.1689	16.4747	15.2223	1.8654	2.2576	1.8521	8.8906	10.4539	9.0175	Kirmizi_Pistachio
64900	1152.98	445.089	195.727	0.8981	287.46	0.9297	69806	0.716	2.274	0.6135	0.6458	0.0069	0.003	0.4171	0.9485	216.603	201.19	175.189	24.0904	24.5929	25.8804	-0.568	-0.4767	-0.1455	2.3474	2.3609	2.6982	Kirmizi_Pistachio
76426	1606	433.212	234.254	0.8412	311.943	0.9291	82258	0.6987	1.8493	0.3724	0.7201	0.0057	0.0031	0.5185	0.9589	222.9	211.11	184.675	26.0041	25.312	26.0878	-0.725	-0.6926	-0.7847	2.6421	2.545	2.9235	Kirmizi_Pistachio
78723	1172.6	432.467	239.309	0.8329	316.596	0.9653	81557	0.6697	1.8071	0.7195	0.7321	0.0055	0.003	0.5359	0.9685	224.387	215.154	202.066	24.2508	25.0236	25.6368	-1.1384	-1.0108	-1.0165	3.4884	3.2964	3.2905	Kirmizi_Pistachio
88425	1326.8	494.267	230.239	0.8849	335.539	0.9773	90478	0.7615	2.1468	0.6312	0.6789	0.0056	0.0026	0.4609	0.9893	221.88	208.254	181.838	23.0324	24.1783	26.4804	-0.7167	-0.5659	-0.5442	3.1143	2.7295	2.51	Kirmizi_Pistachio
76159	1338.58	463.306	219.618	0.8805	311.398	0.9315	81761	0.5775	2.1096	0.5341	0.6721	0.0061	0.0029	0.4517	0.953	197.572	185.18	186.283	20.5162	21.6499	20.9	-0.1969	-0.0387	-0.174	2.1536	2.2535	2.3726	Kirmizi_Pistachio
60644	1234.63	414.709	191.042	0.8876	277.875	0.9522	63686	0.6301	2.1708	0.4999	0.67	0.0068	0.0032	0.449	0.9746	205.786	193.759	156.547	19.8517	21.958	26.51	-0.3176	-0.1311	0.2875	2.3915	2.169	2.2608	Kirmizi_Pistachio
71661	1294.12	453.583	221.362	0.8728	302.062	0.8917	80363	0.6464	2.0491	0.5377	0.6659	0.0063	0.0031	0.4435	0.9087	202.588	190.483	171.928	19.5864	20.2993	21.5164	-0.5169	-0.3329	0.0885	2.5654	2.5026	2.6128	Kirmizi_Pistachio
72970	1205.6	467.115	208.161	0.8952	304.809	0.9421	77457	0.7441	2.244	0.6309	0.6525	0.0064	0.0029	0.4258	0.9555	217.796	207.505	187.736	20.6084	20.1423	20.2611	-1.1286	-1.1561	-0.6461	3.9392	4.1993	4.2688	Kirmizi_Pistachio
90911	1261.58	477.104	245.939	0.8569	340.223	0.9799	92778	0.6417	1.9399	0.7178	0.7131	0.0052	0.0027	0.5085	0.9865	184.07	175.641	169.706	14.4208	14.3465	13.4445	-0.2698	-0.2339	0.1583	2.3977	2.3695	3.0462	Kirmizi_Pistachio
84778	2389.24	456.883	269.267	0.8079	328.546	0.8754	96847	0.6745	1.6968	0.1866	0.7191	0.0054	0.0032	0.5171	0.8774	214.707	206.093	191.472	25.5623	26.3008	28.559	-0.4312	-0.4076	-0.5542	2.1464	2.1301	2.4078	Kirmizi_Pistachio
94688	2029.23	492.84	263.326	0.8453	347.218	0.9192	103012	0.6826	1.8716	0.289	0.7045	0.0052	0.0028	0.4964	0.929	209.924	200.178	182.412	23.8866	24.5468	25.5162	-0.2968	-0.2306	-0.0952	2.1827	2.1507	2.4638	Kirmizi_Pistachio
76410	1966.1	462.859	223.089	0.8762	311.911	0.8895	85901	0.7084	2.0748	0.2484	0.6739	0.0061	0.0029	0.4541	0.9422	195.41	181.16	165.685	16.6279	17.0278	17.3052	0.1159	0.225	0.704	2.9568	3.4077	4.7492	Kirmizi_Pistachio
67330	1632.72	453.959	197.071	0.9009	292.792	0.9141	73654	0.6594	2.3035	0.3174	0.645	0.0067	0.0029	0.416	0.9583	201.611	190.789	173.899	19.6528	21.3132	27.7282	-0.3226	-0.0459	0.4107	2.5689	2.5084	2.8948	Kirmizi_Pistachio
84844	1265.95	489.61	225.02	0.8881	328.674	0.9645	87971	0.7706	2.1759	0.6653	0.6713	0.0058	0.0027	0.4506	0.9805	198.408	188.788	178.853	15.7638	16.8605	19.1311	-0.1146	0.0547	0.6264	3.1284	3.1598	3.6381	Kirmizi_Pistachio
73930	1155.99	434.646	229.154	0.8497	306.807	0.9534	77545	0.719	1.8967	0.6952	0.7059	0.0059	0.0031	0.4983	0.9451	216.373	207.329	191.97	24.6262	25.998	24.3494	-0.6254	-0.5717	-0.4383	2.5942	2.4883	2.5331	Kirmizi_Pistachio
77282	2003.61	468.963	220.984	0.882	313.685	0.9001	85862	0.6953	2.1222	0.2419	0.6689	0.0061	0.0029	0.4474	0.9495	194.418	184.661	180.657	17.8749	19.133	20.0826	0.1775	0.3379	0.4795	3.703	3.7934	4.6584	Kirmizi_Pistachio
77121	1205.93	457.71	219.758	0.8772	313.358	0.9649	79928	0.755	2.0828	0.6664	0.6846	0.0059	0.0028	0.4687	0.9762	219.63	213.205	195.892	23.0135	23.7293	24.6829	-1.0811	-1.0048	-0.6714	3.3951	3.1828	2.4794	Kirmizi_Pistachio
77289	1183.11	471.762	213.246	0.892	313.7	0.9704	79647	0.6719	2.2123	0.6939	0.665	0.0061	0.0028	0.4422	0.9782	223.391	221.963	206.674	22.5909	24.1588	21.9902	-0.7935	-0.6507	-0.6646	3.3722	2.8398	3.7842	Kirmizi_Pistachio
79301	1227.24	464.254	224.872	0.8749	317.757	0.9531	83206	0.5734	2.0645	0.6617	0.6844	0.0059	0.0028	0.4685	0.9672	219.953	212.897	190.753	21.8897	23.0891	22.9654	-1.2773	-1.1508	-1.0616	3.8794	3.6273	3.3711	Kirmizi_Pistachio
76243	1147.8	427.491	236.7	0.8327	311.57	0.9252	82410	0.691	1.806	0.7272	0.7288	0.0056	0.0031	0.5312	0.9594	220.552	212.333	190.792	23.7272	25.0858	24.4028	-1.072	-1.0313	-1.0187	3.1138	3.0478	3.2624	Kirmizi_Pistachio
92225	2651.11	481.046	280.84	0.8119	342.673	0.8696	106056	0.6737	1.7129	0.1649	0.7123	0.0052	0.003	0.5074	0.8692	209.625	198.315	184.656	22.6659	24.5759	27.8613	-0.4977	-0.4226	-0.2274	2.4239	2.387	2.1797	Kirmizi_Pistachio
68438	1075.89	416.663	216.737	0.8541	295.191	0.9553	71640	0.7547	1.9224	0.743	0.7085	0.0061	0.0032	0.5019	0.9649	210.672	196.562	169.57	18.1005	18.8822	20.8715	-0.5968	-0.2855	0.1597	3.2497	2.9534	3.7168	Kirmizi_Pistachio
86614	1269.7	510.118	219.445	0.9027	332.085	0.9663	89631	0.7489	2.3246	0.6751	0.651	0.0059	0.0025	0.4238	0.9851	223.252	211.468	184.855	23.905	24.7033	25.7017	-0.9699	-0.8604	-0.5824	2.9653	2.9377	2.6677	Kirmizi_Pistachio
78556	1682.81	470.528	216.923	0.8874	316.26	0.9645	81448	0.7495	2.1691	0.3486	0.6721	0.006	0.0028	0.4518	0.9799	229.27	221.127	198.422	25.2218	28.4388	28.1948	-0.9244	-0.7196	-0.5731	2.8695	2.5156	2.2973	Kirmizi_Pistachio
52223	1621.45	350.183	269.906	0.6371	257.861	0.7218	72347	0.5785	1.2974	0.2496	0.7364	0.0067	0.0052	0.5422	0.7035	203.54	191.321	165.319	19.7785	22.2105	26.7584	-0.0092	0.2671	0.613	2.7289	2.8016	3.3398	Kirmizi_Pistachio
78504	2356.8	454.821	231.672	0.8605	316.156	0.9104	86230	0.729	1.9632	0.1776	0.6951	0.0058	0.003	0.4832	0.9486	207.838	200.661	187.345	21.5792	23.7369	27.053	-0.37	-0.1949	-0.0301	2.7788	2.6392	3.1287	Kirmizi_Pistachio
83887	1620.59	475.042	229.437	0.8756	326.815	0.9355	89668	0.7118	2.0705	0.4014	0.688	0.0057	0.0027	0.4733	0.98	195.337	183.482	165.904	16.2561	17.0439	18.4417	-0.1451	0.0437	0.5351	2.973	3.2938	4.6686	Kirmizi_Pistachio
91189	1250.99	506.508	232.45	0.8885	340.743	0.9758	93446	0.698	2.179	0.7322	0.6727	0.0056	0.0025	0.4526	0.9861	220.738	216.539	199.331	23.3391	24.4021	28.5784	-0.8234	-0.6695	-0.428	3.0743	2.7955	2.5001	Kirmizi_Pistachio
68626	1407.53	448.539	198.979	0.8962	295.597	0.9471	72456	0.7662	2.2542	0.4353	0.659	0.0065	0.0029	0.4343	0.979	216.342	205.317	190.087	24.4091	25.6984	28.5108	-0.8011	-0.6479	-0.6135	2.5193	2.4528	2.4083	Kirmizi_Pistachio
70919	2090.94	433.614	235.168	0.8402	300.494	0.8548	82965	0.6895	1.8438	0.2038	0.693	0.0061	0.0033	0.4802	0.8855	206.83	201.436	192.416	22.8351	24.7737	26.3049	-0.3539	-0.1712	-0.0865	2.3286	2.3256	2.5264	Kirmizi_Pistachio
85050	1222.88	466.862	241.008	0.8565	329.073	0.9579	88785	0.7342	1.9371	0.7147	0.7049	0.0055	0.0028	0.4968	0.9624	235.315	227.138	213.054	20.5553	22.0989	20.5159	-1.4562	-1.1388	-0.8224	4.9651	3.9899	3.6417	Kirmizi_Pistachio
62824	1071.88	429.456	188.384	0.8987	282.825	0.979	64170	0.7521	2.2797	0.6871	0.6586	0.0068	0.003	0.4337	0.9887	218.967	204.742	195.475	23.8435	26.0211	27.0606	-0.6169	0.0395	-0.328	2.679	2.4715	2.6271	Kirmizi_Pistachio
66416	1214.9	424.697	207.991	0.8719	290.798	0.9325	71220	0.7355	2.0419	0.5655	0.6847	0.0064	0.0031	0.4688	0.9573	216.333	211.561	193.736	23.7433	26.079	28.0591	-0.8029	-0.7383	-0.6238	2.6235	2.4865	2.3976	Kirmizi_Pistachio
52622	1196.17	392.86	174.026	0.8965	258.844	0.9417	55878	0.7535	2.2575	0.4622	0.6589	0.0075	0.0033	0.4341	0.98	188.551	181.868	185.481	15.3305	16.3001	14.8927	-0.7356	-0.6525	-0.6564	2.9006	2.6997	3.0821	Kirmizi_Pistachio
70230	1867.84	426.689	236.297	0.8327	299.031	0.8531	82323	0.6896	1.8057	0.253	0.7008	0.0061	0.0034	0.4911	0.8869	212.369	204.646	190	24.7975	25.9164	27.3649	-0.4136	-0.3944	-0.3638	2.0361	2.02	1.9837	Kirmizi_Pistachio
89459	2353.71	486.622	246.6	0.8621	337.495	0.9151	97758	0.7116	1.9733	0.2029	0.6935	0.0054	0.0028	0.481	0.9492	206.559	195.248	178.491	19.6324	22.2414	21.4674	-0.6666	-0.4956	0.0061	3.0158	2.7478	3.3595	Kirmizi_Pistachio
88907	1257.83	481.424	243.481	0.8627	336.452	0.9425	94333	0.7117	1.9773	0.7062	0.6989	0.0054	0.0027	0.4884	0.9657	229.531	218.602	194.207	25.4655	26.6328	27.1827	-0.9875	-0.7769	-0.4798	3.1553	2.7926	2.3534	Kirmizi_Pistachio
79236	1885.22	461.618	246.489	0.8455	317.626	0.8759	90460	0.6936	1.8728	0.2802	0.6881	0.0058	0.0031	0.4734	0.8866	219.93	211.474	198.26	23.3947	23.8955	23.5542	-0.62	-0.6464	-0.5702	2.7001	2.7049	2.8529	Kirmizi_Pistachio
66727	1780.39	414.187	235.228	0.8231	291.478	0.8405	79390	0.6015	1.7608	0.2645	0.7037	0.0062	0.0035	0.4952	0.872	225.827	213.01	183.587	25.3079	26.1799	26.327	-0.7218	-0.6358	-0.3342	2.4797	2.4278	2.9133	Kirmizi_Pistachio
79655	1958.98	465.967	237.967	0.8598	318.465	0.8988	88626	0.6613	1.9581	0.2608	0.6835	0.0058	0.003	0.4671	0.9146	216.659	211.04	197.996	24.424	26.5801	30.1728	-0.506	-0.4211	-0.3261	2.3883	2.3012	2.2158	Kirmizi_Pistachio
60614	1119.37	390.418	210.097	0.8429	277.806	0.9428	64291	0.681	1.8583	0.6079	0.7116	0.0064	0.0035	0.5063	0.9409	198.733	187.762	168.275	21.4189	22.5231	21.7161	-0.0686	-0.0885	0.0304	2.2346	2.1841	2.3258	Kirmizi_Pistachio
79705	1382.5	495.184	210.453	0.9052	318.565	0.9455	84299	0.7711	2.3529	0.524	0.6433	0.0062	0.0026	0.4139	0.9738	201.939	194.388	183.333	20.0239	20.0717	20.056	-0.2689	-0.0468	0.1818	3.033	3.1603	3.9063	Kirmizi_Pistachio
73107	1161.81	442.407	217.726	0.8705	305.095	0.9424	77579	0.771	2.0319	0.6806	0.6896	0.0061	0.003	0.4756	0.9664	214.742	204.351	191.653	20.0888	20.8495	22.5423	-0.841	-0.6756	-0.5194	3.4263	3.2577	3.1143	Kirmizi_Pistachio
91398	1386.33	488.154	240.481	0.8702	341.133	0.9788	93376	0.7289	2.0299	0.5976	0.6988	0.0053	0.0026	0.4884	0.9913	226.36	215.317	205.679	23.6998	24.3551	23.5136	-1.1822	-1.0677	-0.5989	3.8183	3.6002	3.327	Kirmizi_Pistachio
67840	1009.39	390.641	224.541	0.8183	293.899	0.9889	68604	0.7447	1.7397	0.8367	0.7523	0.0058	0.0033	0.566	0.9847	231.006	222.485	201.207	21.4296	21.2194	19.8415	-1.3137	-1.0619	-0.8516	4.6544	4.1673	3.4451	Kirmizi_Pistachio
73903	1240.73	419.63	229.394	0.8374	306.751	0.9643	76636	0.7372	1.8293	0.6033	0.731	0.0057	0.0031	0.5344	0.9775	198.892	190.754	173.89	20.3536	21.1965	20.6591	-0.241	-0.2501	-0.2915	2.2561	2.2362	2.2715	Kirmizi_Pistachio
78569	1408.89	456.705	224.882	0.8704	316.286	0.9296	84516	0.7151	2.0309	0.4974	0.6925	0.0058	0.0029	0.4796	0.974	206.541	196.378	181.928	18.867	20.116	22.9278	-0.3967	-0.1782	0.4566	3.4459	3.483	4.2079	Kirmizi_Pistachio
79201	1274.83	461.771	220.351	0.8788	317.556	0.9756	81180	0.7635	2.0956	0.6124	0.6877	0.0058	0.0028	0.4729	0.9911	213.344	204.279	193.768	20.6852	21.0699	23.104	-0.6909	-0.5667	-0.362	3.2169	3.0262	3.137	Kirmizi_Pistachio
72454	1702.65	425.677	233.879	0.8355	303.729	0.9234	78464	0.6792	1.8201	0.3141	0.7135	0.0059	0.0032	0.5091	0.9266	225.705	217.33	199.272	25.3339	26.3421	26.856	-0.826	-0.6473	-0.4182	2.8385	2.5414	2.218	Kirmizi_Pistachio
84256	1125.69	447.82	241.506	0.8421	327.533	0.9897	85129	0.7618	1.8543	0.8356	0.7314	0.0053	0.0029	0.5349	0.9919	214.583	203.111	198.989	19.5902	21.1792	24.4375	-0.2842	0.0561	0.4593	3.1827	3.1099	3.1627	Kirmizi_Pistachio
76134	1707.9	401.447	275.057	0.7284	311.347	0.8604	88486	0.6287	1.4595	0.328	0.7756	0.0053	0.0036	0.6015	0.8779	198.641	188.267	176.94	26.2609	29.0361	28.5005	0.5364	0.6352	0.5697	2.3393	2.4667	2.5981	Kirmizi_Pistachio
74419	1407.14	415.798	232.528	0.829	307.82	0.933	79759	0.6907	1.7882	0.4723	0.7403	0.0056	0.0031	0.5481	0.98	199.168	188.924	180.328	19.2192	20.6474	23.3213	-0.115	0.0156	0.5778	2.9216	2.8269	3.5326	Kirmizi_Pistachio
70790	1141.76	426.382	215.846	0.8624	300.221	0.9627	73535	0.7196	1.9754	0.6824	0.7041	0.006	0.003	0.4958	0.9794	225.189	212.285	195.93	27.369	28.2008	28.8649	-0.7492	-0.7299	-0.6278	2.4868	2.4937	2.5969	Kirmizi_Pistachio
72688	1160.56	448.44	215.847	0.8765	304.219	0.9452	76901	0.7118	2.0776	0.6782	0.6784	0.0062	0.003	0.4602	0.9561	196.419	185.725	173.147	15.4159	16.3318	17.0773	-0.3418	-0.2396	0.7806	3.3319	3.3523	4.7464	Kirmizi_Pistachio
72852	1069.8	411.447	227.983	0.8324	304.562	0.9804	74308	0.7482	1.8047	0.7999	0.7402	0.0056	0.0031	0.5479	0.9889	233.89	223.3	208.985	25.0728	24.3551	23.967	-1.3279	-1.236	-0.979	4.0994	3.898	3.5656	Kirmizi_Pistachio
59436	1029.43	368.61	215.999	0.8103	275.093	0.9111	65234	0.69	1.7065	0.7048	0.7463	0.0062	0.0036	0.557	0.9505	220.581	206.664	190.356	25.4084	26.1638	21.8229	-0.8076	-0.8771	-0.6426	2.6906	2.8111	2.8745	Kirmizi_Pistachio
66501	1048.34	393.584	217.591	0.8333	290.984	0.9775	68034	0.7657	1.8088	0.7604	0.7393	0.0059	0.0033	0.5466	0.9887	236.854	226.676	204.473	25.3499	27.4287	28.9265	-1.6118	-1.2079	-1.1741	4.8798	3.7356	3.7178	Kirmizi_Pistachio
90167	1201.21	481.317	238.921	0.8681	338.828	0.9907	91010	0.7629	2.0145	0.7853	0.704	0.0053	0.0026	0.4956	0.9983	226.542	216.177	199.394	21.9193	20.4296	18.2634	-1.3029	-1.2849	-0.9893	4.4737	4.4045	3.9855	Kirmizi_Pistachio
88270	1277.97	472.19	246.64	0.8527	335.245	0.9454	93363	0.7631	1.9145	0.6792	0.71	0.0053	0.0028	0.5041	0.965	222.408	206.846	183.643	26.7891	26.812	23.5043	-0.6458	-0.6896	-0.685	2.2186	2.3097	2.4554	Kirmizi_Pistachio
86530	1199.53	468.401	236.669	0.863	331.924	0.9848	87862	0.736	1.9791	0.7557	0.7086	0.0054	0.0027	0.5022	0.9938	216.058	206.484	206.245	22.8639	24.5935	25.1237	-0.6783	-0.5244	-0.1293	2.8796	2.6328	2.2371	Kirmizi_Pistachio
51277	1564.61	402.573	184.308	0.889	255.515	0.8433	60808	0.6573	2.1842	0.2632	0.6347	0.0079	0.0036	0.4028	0.8799	182.366	170.455	162.292	14.4289	14.8295	14.7803	0.0682	0.1431	0.045	2.1544	2.117	2.2148	Kirmizi_Pistachio
94537	1496.25	472.813	262.923	0.8311	346.941	0.9475	99779	0.7394	1.7983	0.5306	0.7338	0.005	0.0028	0.5384	0.9683	210.246	202.131	193.798	22.5505	23.4585	21.5082	-0.6692	-0.6141	-0.5576	2.6707	2.61	2.6641	Kirmizi_Pistachio
65360	1056.75	414.039	205.439	0.8682	288.477	0.9587	68173	0.6149	2.0154	0.7355	0.6967	0.0063	0.0031	0.4854	0.9784	219.787	210.293	190.235	26.705	28.191	24.9316	-0.7223	-0.6936	-0.7634	2.4265	2.3176	2.6436	Kirmizi_Pistachio
93607	1272.7	449.716	268.543	0.8021	345.231	0.9649	97009	0.7786	1.6747	0.7262	0.7677	0.0048	0.0029	0.5893	0.9869	199.619	182.906	178.057	19.6403	18.8421	17.4056	-0.4345	-0.4538	-0.198	2.2427	2.1755	2.7037	Kirmizi_Pistachio
90845	1338.35	498.351	237.66	0.879	340.099	0.9551	95113	0.7709	2.0969	0.6373	0.6824	0.0055	0.0026	0.4657	0.9766	222.366	212.898	201.571	26.5234	27.4834	25.6491	-0.7673	-0.8028	-0.705	2.5477	2.63	2.5423	Kirmizi_Pistachio
67116	1140.54	444.114	200.619	0.8922	292.326	0.9507	70594	0.7868	2.2137	0.6484	0.6582	0.0066	0.003	0.4333	0.9591	217.161	204.64	180.308	26.5251	26.7566	25.2328	-0.4166	-0.435	-0.3659	2.0194	2.0439	2.127	Kirmizi_Pistachio
69177	1083	413.94	215.529	0.8538	296.781	0.9749	70955	0.7501	1.9206	0.7412	0.717	0.006	0.0031	0.514	0.9873	219.287	207.656	187.829	19.5265	20.7113	18.8938	-1.0279	-0.8276	-0.4001	3.941	3.0449	3.5131	Kirmizi_Pistachio
75828	1160.81	459.469	215.405	0.8833	310.721	0.9672	78401	0.7643	2.133	0.7072	0.6763	0.0061	0.0028	0.4573	0.9755	222.997	209.559	182.698	22.1662	22.3043	22.5591	-1.1347	-1.0531	-0.9915	3.6021	3.4986	3.4354	Kirmizi_Pistachio
71026	1101.16	430.563	215.923	0.8652	300.721	0.9733	72977	0.6608	1.9941	0.7361	0.6984	0.0061	0.003	0.4878	0.9727	198.193	189.649	177.667	15.8591	16.5251	17.5321	-0.5429	-0.4028	-0.0829	2.9033	2.7607	3.0516	Kirmizi_Pistachio
73688	1193.8	434.149	239.408	0.8342	306.305	0.9014	81750	0.6836	1.8134	0.6497	0.7055	0.0059	0.0032	0.4978	0.9027	211.161	203.018	186.888	27.07	27.3462	25.3853	-0.1935	-0.2067	-0.1252	2.0105	2.0755	2.2527	Kirmizi_Pistachio
84660	1207.87	459.231	238.667	0.8543	328.318	0.9574	88426	0.7536	1.9241	0.7292	0.7149	0.0054	0.0028	0.5111	0.9835	212.919	200.808	189.923	23.1148	24.3256	24.6449	-0.4774	-0.4779	-0.6237	2.2926	2.2796	2.6443	Kirmizi_Pistachio
72391	1166.88	423.921	230.169	0.8398	303.597	0.9188	78785	0.7542	1.8418	0.6681	0.7162	0.0059	0.0032	0.5129	0.9446	204.628	194.718	176.092	21.9364	22.7958	25.8584	-0.2725	-0.2317	-0.942	2.1785	2.1495	4.4936	Kirmizi_Pistachio
91449	1221.65	496.9	236.579	0.8794	341.228	0.9889	92475	0.7481	2.1004	0.77	0.6867	0.0054	0.0026	0.4716	0.9905	221.082	211.133	194.479	21.587	21.7822	21.7581	-0.5199	-0.3032	-0.0049	2.9935	2.7569	2.532	Kirmizi_Pistachio
52067	1049.92	402.425	171.124	0.9051	257.476	0.9457	55054	0.6628	2.3517	0.5936	0.6398	0.0077	0.0033	0.4094	0.9627	203.519	196.169	194.043	20.9055	22.7753	22.8403	-0.6293	-0.5763	-0.5042	2.3598	2.2495	2.0275	Kirmizi_Pistachio
79613	1191.88	464.92	220.278	0.8806	318.381	0.9787	81349	0.7747	2.1106	0.7042	0.6848	0.0058	0.0028	0.469	0.9898	211.069	203.417	192.018	19.9876	21.0768	22.5394	-0.674	-0.4009	0.0677	3.3676	3.1857	3.2861	Kirmizi_Pistachio
78194	1148.03	458.542	221.138	0.876	315.531	0.9641	81103	0.7723	2.0736	0.7456	0.6881	0.0059	0.0028	0.4735	0.9818	221.046	215.021	197.093	26.8734	27.5936	25.3554	-0.6792	-0.6455	-0.6034	2.392	2.3608	2.3247	Kirmizi_Pistachio
81762	1180.48	468.177	227.393	0.8741	322.649	0.9653	84702	0.7285	2.0589	0.7373	0.6892	0.0057	0.0028	0.4749	0.9779	213.347	202.314	184.7	23.46	24.9213	27.0874	-0.5615	-0.4548	-0.3098	2.3984	2.1864	1.9383	Kirmizi_Pistachio
84641	1200.06	444.748	248.167	0.8298	328.281	0.9718	87099	0.7436	1.7921	0.7386	0.7381	0.0053	0.0029	0.5448	0.9764	223.536	214.01	205.801	24.7081	24.3294	22.0935	-0.8743	-0.8609	-0.8373	2.9921	2.9654	3.0786	Kirmizi_Pistachio
60955	999.789	386.925	209.125	0.8414	278.586	0.9465	64400	0.7263	1.8502	0.7663	0.72	0.0063	0.0034	0.5184	0.9591	223.792	209.296	184.489	26.3523	25.4566	20.0581	-0.7127	-0.7616	-0.7684	2.6239	2.7771	2.6904	Kirmizi_Pistachio
73215	1108	443.81	212.58	0.8778	305.32	0.983	74478	0.7756	2.0877	0.7494	0.688	0.0061	0.0029	0.4733	0.9881	226.745	219.414	199.427	27.4194	29.7045	27.8726	-0.7445	-0.5886	-0.5661	2.4777	2.279	2.3419	Kirmizi_Pistachio
69853	1062.26	432.111	206.956	0.8778	298.227	0.9897	70583	0.7471	2.0879	0.7779	0.6902	0.0062	0.003	0.4763	0.9945	232.99	229.11	205.443	26.2674	27.9986	25.6454	-1.2294	-1.015	-0.6698	3.6116	3.0617	2.3466	Kirmizi_Pistachio
68502	1060.02	434.06	201.665	0.8855	295.329	0.9894	69234	0.7719	2.1524	0.7661	0.6804	0.0063	0.0029	0.4629	0.9964	215.417	212.916	198.553	23.0707	25.355	22.346	-0.6925	-0.4724	-0.4773	2.8656	2.4384	2.3883	Kirmizi_Pistachio
84053	1215.76	434.93	267.216	0.789	327.139	0.9302	90358	0.6831	1.6276	0.7146	0.7522	0.0052	0.0032	0.5658	0.9208	217.253	209.463	192.556	27.4211	28.3237	31.0431	-0.4176	-0.3136	-0.3393	2.1866	2.1455	2.3261	Kirmizi_Pistachio
72133	1136.97	421.892	227.75	0.8418	303.055	0.9348	77162	0.7403	1.8524	0.7012	0.7183	0.0058	0.0032	0.516	0.9558	221.5	210.926	190.328	30.0385	33.6146	29.2426	-0.4142	-0.3587	-0.3307	1.7936	1.853	1.986	Kirmizi_Pistachio
69906	1332.14	432.681	232.209	0.8438	298.341	0.8517	82077	0.6905	1.8633	0.495	0.6895	0.0062	0.0033	0.4754	0.8859	212.281	197.598	172.895	24.5382	25.1568	22.87	-0.5122	-0.4629	-0.3875	2.0607	2.0635	2.3236	Kirmizi_Pistachio
89928	1235.52	491.588	235.205	0.8781	338.378	0.981	91671	0.7005	2.09	0.7403	0.6883	0.0055	0.0026	0.4738	0.9903	235.844	231.706	216.655	24.1774	26.2398	25.713	-1.4005	-1.103	-0.6449	4.3882	3.4352	2.7137	Kirmizi_Pistachio
64374	1039.73	419.215	198.627	0.8806	286.293	0.9786	65783	0.7512	2.1106	0.7483	0.6829	0.0065	0.0031	0.4664	0.9843	219.922	213.54	192.967	18.7554	19.2077	18.8338	-1.7576	-1.6582	-1.3274	5.5861	5.2603	4.6653	Kirmizi_Pistachio
74420	1109.04	424.915	224.094	0.8496	307.822	0.9821	75778	0.7416	1.8961	0.7603	0.7244	0.0057	0.003	0.5248	0.9951	219.088	209.896	187.208	22.5387	22.5746	21.1547	-0.9938	-0.8571	-0.4946	3.3425	3.1105	2.8333	Kirmizi_Pistachio
74029	1121.34	468.862	203.06	0.9014	307.012	0.9889	74862	0.7333	2.309	0.7398	0.6548	0.0063	0.0027	0.4288	0.99	214.129	204.409	190.431	17.6206	17.6549	19.0682	-0.8424	-0.6034	-0.487	4.0162	3.747	3.9005	Kirmizi_Pistachio
59217	987.067	388.218	198.014	0.8601	274.586	0.9812	60353	0.7935	1.9606	0.7638	0.7073	0.0066	0.0033	0.5003	0.9808	224.149	211.585	196.102	27.0352	28.2457	26.5292	-0.7611	-0.6603	-0.5365	2.5226	2.3094	2.2431	Kirmizi_Pistachio
73019	1119.12	440.887	219.619	0.8671	304.911	0.9606	76015	0.733	2.0075	0.7326	0.6916	0.006	0.003	0.4783	0.9602	203.371	192.107	177.77	17.2881	18.6115	19.7099	-0.2325	0.0829	0.618	3.8085	4.0409	4.8251	Kirmizi_Pistachio
83932	1823.86	490.006	229.595	0.8834	326.903	0.9376	89514	0.7732	2.1342	0.3171	0.6671	0.0058	0.0027	0.4451	0.9499	226.492	219.131	197.957	30.8383	33.4277	34.5876	-0.7671	-0.653	-0.3813	2.1801	2.1172	2.1298	Kirmizi_Pistachio
73826	1299.89	455.077	218.253	0.8775	306.591	0.9436	78242	0.6594	2.0851	0.549	0.6737	0.0062	0.003	0.4539	0.9464	208.769	192.945	167.766	21.1698	21.7316	20.775	-0.6455	-0.6505	-0.6114	2.261	2.3323	2.7074	Kirmizi_Pistachio
79301	1122.43	436.658	233.27	0.8453	317.757	0.9869	80356	0.7437	1.8719	0.791	0.7277	0.0055	0.0029	0.5295	0.9913	200.748	188.979	174.354	16.0337	16.4499	16.3617	-0.4823	-0.3265	-0.0693	2.9175	2.573	2.4111	Kirmizi_Pistachio
80603	1214.22	457.354	227.81	0.8671	320.354	0.9754	82638	0.749	2.0076	0.687	0.7005	0.0057	0.0028	0.4906	0.985	203.721	194.255	179.876	18.3589	19.2189	21.4666	-0.3445	-0.237	0.0008	2.467	2.2386	2.1272	Kirmizi_Pistachio
67474	1718.98	395.128	242.168	0.7902	293.105	0.8906	75765	0.6994	1.6316	0.287	0.7418	0.0059	0.0036	0.5503	0.8978	215.029	204.009	195.381	27.6804	30.2632	23.9156	-0.3692	-0.4544	-0.188	2.0471	2.2568	2.174	Kirmizi_Pistachio
68488	1106.69	421.361	211.911	0.8643	295.299	0.9517	71962	0.7189	1.9884	0.7027	0.7008	0.0062	0.0031	0.4912	0.9766	213.299	201.259	183.94	26.5183	26.9834	26.279	-0.3451	-0.3222	-0.1464	1.9279	1.9529	1.9553	Kirmizi_Pistachio
55227	981.211	375.766	188.913	0.8644	265.174	0.9756	56610	0.7229	1.9891	0.7208	0.7057	0.0068	0.0034	0.498	0.9906	213.554	205.889	184.381	25.7313	26.4959	25.6064	-0.3965	-0.3353	-0.3366	2.0827	2.0517	2.3681	Kirmizi_Pistachio
37149	1238.59	372.685	135.695	0.9314	217.485	0.8778	42322	0.7071	2.7465	0.3043	0.5836	0.01	0.0037	0.3405	0.9353	180.115	172.031	173.523	15.1543	15.1963	13.6866	0.0232	0.1351	-0.0968	2.0649	2.1827	2.451	Kirmizi_Pistachio
62949	1080.74	439.354	182.887	0.9092	283.106	0.9849	63915	0.7138	2.4023	0.6773	0.6444	0.007	0.0029	0.4152	0.9975	204.246	198.287	187.899	21.146	21.3917	18.2959	-0.8889	-0.8161	-0.671	2.6524	2.4833	2.3041	Kirmizi_Pistachio
51613	940.58	379.763	177.814	0.8836	256.351	0.9775	52802	0.7566	2.1357	0.7331	0.675	0.0074	0.0034	0.4557	0.9732	224.583	217.086	211.019	25.1111	28.5325	27.3861	-0.9656	-0.6753	-0.5601	3.1045	2.4971	2.3889	Kirmizi_Pistachio
60173	1543.68	445.346	183.664	0.911	276.793	0.8804	68345	0.6915	2.4248	0.3173	0.6215	0.0074	0.0031	0.3863	0.9367	183.57	172.829	160.801	15.0582	15.2049	13.0248	0.2465	0.2106	0.5386	2.364	2.3492	4.4063	Kirmizi_Pistachio
60808	1542.35	385.182	218.336	0.8238	278.25	0.9125	66636	0.7139	1.7642	0.3212	0.7224	0.0063	0.0036	0.5218	0.9206	216.006	210.247	204.675	25.7428	26.5781	24.1005	-0.467	-0.4853	-0.4537	2.3641	2.3699	2.0984	Kirmizi_Pistachio
74036	1130.12	459.674	210.96	0.8885	307.027	0.9693	76379	0.7552	2.179	0.7285	0.6679	0.0062	0.0028	0.4461	0.9721	225.295	214.53	199.608	25.7439	26.7073	24.7771	-0.7074	-0.6738	-0.667	2.5281	2.4829	2.4882	Kirmizi_Pistachio
89384	1263.13	486.248	246.497	0.862	337.353	0.9494	94146	0.7341	1.9726	0.704	0.6938	0.0054	0.0028	0.4813	0.9495	219.934	211.62	193.246	22.5588	23.8121	20.0936	-0.8729	-0.8924	-0.7608	3.2245	3.2135	3.076	Kirmizi_Pistachio
70376	1108.04	425.954	212.049	0.8673	299.342	0.977	72036	0.7189	2.0087	0.7203	0.7028	0.0061	0.003	0.4939	0.9921	201.039	193.581	181.008	15.1168	15.7225	15.1901	-1.0058	-0.9472	-0.3701	4.3051	4.1904	5.3909	Kirmizi_Pistachio
71380	1059.8	430.088	213.641	0.8679	301.469	0.9856	72426	0.7614	2.0131	0.7986	0.7009	0.006	0.003	0.4913	0.9891	238.991	230.035	204.15	20.329	21.8308	19.3863	-1.7221	-1.2516	-1.2256	5.8484	4.7012	4.2825	Kirmizi_Pistachio
60621	1126.42	404.796	206.722	0.8598	277.822	0.8815	68769	0.6777	1.9582	0.6004	0.6863	0.0067	0.0034	0.471	0.9224	209.775	199.621	184.202	19.0605	19.3826	16.7851	-0.9918	-0.9155	-0.7235	3.3199	3.1252	2.8586	Kirmizi_Pistachio
60357	1058.65	407.758	193.518	0.8802	277.216	0.96	62875	0.7628	2.1071	0.6768	0.6799	0.0068	0.0032	0.4622	0.9739	215.042	201.201	189.025	21.6837	24.5303	23.7115	-0.5079	-0.2981	0.172	2.6983	2.428	2.9479	Kirmizi_Pistachio
80964	1191.38	453.879	228.949	0.8635	321.071	0.9814	82502	0.7212	1.9824	0.7168	0.7074	0.0056	0.0028	0.5004	0.992	214.884	205.319	186.483	21.9065	21.9298	22.736	-0.7117	-0.6588	-0.7906	2.7816	2.7382	2.9117	Kirmizi_Pistachio
62122	1374.83	407.378	227.03	0.8303	281.24	0.8662	71721	0.6307	1.7944	0.413	0.6904	0.0066	0.0037	0.4766	0.8552	190.513	179.804	173.858	15.7174	16.2193	18.0233	-0.295	-0.315	-0.4993	2.2565	2.3424	2.3919	Kirmizi_Pistachio
70569	1358.23	431.2	212.067	0.8707	299.752	0.9545	73936	0.7127	2.0333	0.4807	0.6952	0.0061	0.003	0.4832	0.9826	211.474	202.422	185.396	22.6104	23.3977	21.5888	-0.1382	-0.066	0.0684	2.5117	2.4817	2.3624	Kirmizi_Pistachio
63738	1120.99	407.642	202.048	0.8685	284.875	0.9564	66644	0.7213	2.0176	0.6374	0.6988	0.0064	0.0032	0.4884	0.9853	204.41	191.782	184.588	20.9627	23.7123	24.9707	0.3226	0.6583	0.9125	3.1819	3.3403	4.222	Kirmizi_Pistachio
72915	1150.06	457.834	207.064	0.8919	304.694	0.9702	75155	0.7252	2.2111	0.6928	0.6655	0.0063	0.0028	0.4429	0.9793	221.376	208.483	188.709	24.9003	25.3097	25.0808	-0.591	-0.5665	-0.4719	2.3761	2.4051	2.479	Kirmizi_Pistachio
74183	1149.77	451.687	217.978	0.8758	307.332	0.9343	79399	0.7362	2.0722	0.7052	0.6804	0.0061	0.0029	0.463	0.9593	225.924	214.249	195.315	23.699	23.1692	22.408	-0.9083	-0.9593	-0.8818	2.9891	3.0975	3.2051	Kirmizi_Pistachio
87264	1524.2	424.518	273.375	0.7651	333.329	0.918	95060	0.735	1.5529	0.472	0.7852	0.0049	0.0031	0.6165	0.9574	208.804	195.556	181.125	18.3548	19.7817	21.8168	-0.1158	-0.0148	0.6118	3.2601	3.4527	3.6228	Kirmizi_Pistachio
83811	1648.06	460.569	237.472	0.8568	326.667	0.9424	88931	0.7431	1.9395	0.3878	0.7093	0.0055	0.0028	0.5031	0.9757	217.684	199.674	170.321	21.9731	21.8093	22.2107	-0.6045	-0.6186	-0.6293	2.508	2.6165	3.2652	Kirmizi_Pistachio
79041	1139.02	450.881	229.113	0.8613	317.235	0.9732	81219	0.718	1.9679	0.7656	0.7036	0.0057	0.0029	0.495	0.9742	214.977	203.981	188.792	18.176	19.6283	20.4705	-0.6811	-0.5464	0.2024	3.2623	3.2148	3.7145	Kirmizi_Pistachio
67064	1056.59	425.674	203.319	0.8786	292.213	0.9695	69172	0.781	2.0936	0.7549	0.6865	0.0063	0.003	0.4712	0.9866	220.115	208.92	188.969	17.6652	17.9184	18.7732	-1.4069	-1.1763	-0.5725	4.9513	4.4895	3.3256	Kirmizi_Pistachio
61836	2251.14	379.086	238.225	0.7779	280.592	0.8194	75468	0.6894	1.5913	0.1533	0.7402	0.0061	0.0039	0.5479	0.8718	200.525	189.431	179.658	24.5243	26.5176	25.776	0.0741	0.14	0.1117	1.971	2.0864	2.8935	Kirmizi_Pistachio
86942	1170.25	471.806	235.957	0.866	332.713	0.9904	87781	0.7366	1.9995	0.7978	0.7052	0.0054	0.0027	0.4973	0.9944	217.694	204.932	181.761	19.6693	19.7919	22.1106	-0.2579	0.0093	0.6102	2.7973	2.8144	3.2003	Kirmizi_Pistachio
66196	1032.99	419.59	203.377	0.8747	290.316	0.9802	67532	0.7454	2.0631	0.7796	0.6919	0.0063	0.0031	0.4787	0.9877	220.611	207.184	181.48	22.6483	23.8633	24.4695	-0.4976	-0.3508	-0.4517	2.6886	2.4159	2.7467	Kirmizi_Pistachio
90427	1354.6	486.13	242.884	0.8662	339.316	0.9488	95310	0.7579	2.0015	0.6193	0.698	0.0054	0.0027	0.4872	0.9751	230.656	220.091	204.374	25.0035	25.7589	25.8285	-0.9382	-0.9001	-0.7173	2.8826	2.8172	2.5628	Kirmizi_Pistachio
68902	1114.33	450.521	196.41	0.9	296.19	0.9821	70157	0.7686	2.2938	0.6973	0.6574	0.0065	0.0029	0.4322	0.9914	215.87	211.258	201.679	24.484	24.2871	21.8144	-0.7138	-0.6735	-0.5455	2.5969	2.551	2.4782	Kirmizi_Pistachio
60789	1701.25	447.555	189.595	0.9058	278.207	0.8829	68849	0.6803	2.3606	0.2639	0.6216	0.0074	0.0031	0.3864	0.9121	208.568	196.148	174.697	22.3883	23.1525	22.9009	-0.5033	-0.4344	-0.354	2.2218	2.1453	2.1825	Kirmizi_Pistachio
83793	1322.92	456.776	237.917	0.8536	326.632	0.9545	87789	0.7593	1.9199	0.6017	0.7151	0.0055	0.0028	0.5113	0.9817	219.376	208.076	194.02	22.3066	22.7866	22.8341	-0.8193	-0.8035	-0.5924	2.8488	2.8738	2.922	Kirmizi_Pistachio
68587	1134.89	390.122	227.466	0.8124	295.513	0.9664	70968	0.7149	1.7151	0.6692	0.7575	0.0057	0.0033	0.5738	0.9841	204.665	192.109	177.362	17.2255	17.3918	20.7378	-0.4643	-0.3235	-0.465	3.0994	2.9504	3.0261	Kirmizi_Pistachio
77868	1407.27	462.882	217.344	0.8829	314.872	0.9556	81489	0.7131	2.1297	0.4941	0.6802	0.0059	0.0028	0.4627	0.9855	212.612	202.41	190.31	22.641	25.074	25.2348	-0.0833	0.08	0.1679	2.6273	2.503	2.7126	Kirmizi_Pistachio
68787	1163.2	462.884	198.074	0.9038	295.943	0.9369	73420	0.6107	2.3369	0.6389	0.6393	0.0067	0.0029	0.4088	0.9552	214.613	209.366	200.24	23.9172	26.1389	27.2015	-0.3936	-0.3227	-0.2254	2.2492	2.2144	2.1117	Kirmizi_Pistachio
70450	1188.8	458.576	203.113	0.8966	299.499	0.9419	74795	0.757	2.2577	0.6264	0.6531	0.0065	0.0029	0.4265	0.963	211.729	209.042	197.036	25.3639	28.1898	28.1462	-0.2984	-0.2414	-0.2566	2.1406	2.0555	1.9888	Kirmizi_Pistachio
80719	1262.37	443.839	236.728	0.8459	320.585	0.9545	84568	0.8001	1.8749	0.6365	0.7223	0.0055	0.0029	0.5217	0.9782	229.275	213.096	196.835	23.8778	25.407	25.3113	-1.1324	-0.8638	-0.6309	3.3856	2.8839	3.5037	Kirmizi_Pistachio
77239	1255.16	470.128	217.277	0.8868	313.598	0.947	81564	0.7592	2.1637	0.6161	0.667	0.0061	0.0028	0.445	0.9628	210.012	201.17	195.682	23.3548	24.2903	26.9703	-0.3398	-0.3444	-0.3657	2.2207	2.245	2.2291	Kirmizi_Pistachio
69465	1511.11	426.352	217.519	0.8601	297.398	0.9052	76740	0.7121	1.9601	0.3823	0.6975	0.0061	0.0031	0.4866	0.9537	224.398	206.838	189.201	24.7816	25.9331	23.6182	-0.6557	-0.6657	-0.5085	2.4827	2.5568	3.2293	Kirmizi_Pistachio
51093	949.11	374.228	179.849	0.8769	255.056	0.9726	52534	0.7048	2.0808	0.7128	0.6816	0.0073	0.0035	0.4645	0.9666	224.37	219.731	209.036	26.257	28.1444	26.725	-0.9781	-0.9041	-0.7984	2.9547	2.7944	2.6258	Kirmizi_Pistachio
74945	1285.57	431.785	226.946	0.8507	308.906	0.9449	79317	0.7135	1.9026	0.5698	0.7154	0.0058	0.003	0.5118	0.9738	214.345	208.202	202.166	22.2108	25.4019	27.5167	-0.5194	-0.3018	-0.0186	2.7593	2.4895	2.5554	Kirmizi_Pistachio
69314	1128.06	456.279	205.916	0.8924	297.075	0.9158	75689	0.7228	2.2159	0.6845	0.6511	0.0066	0.003	0.4239	0.9393	222.3	211.465	204.393	25.1216	27.0657	26.7211	-0.6525	-0.5311	-0.4626	2.4322	2.4099	2.1635	Kirmizi_Pistachio
69081	1068.01	437.03	207.556	0.88	296.575	0.9667	71457	0.7155	2.1056	0.7611	0.6786	0.0063	0.003	0.4605	0.9697	232.821	232.742	216.516	23.6147	24.965	24.359	-1.178	-1.2408	-0.6964	3.8857	4.0371	2.935	Kirmizi_Pistachio
84053	1237.29	490.046	228.453	0.8847	327.139	0.9368	89719	0.7342	2.1451	0.69	0.6676	0.0058	0.0027	0.4456	0.9559	231.091	217.312	190.463	26.0471	27.3289	25.7134	-0.9162	-0.6022	-0.2824	2.6621	2.5043	2.5564	Kirmizi_Pistachio
51022	996.282	360.389	209.237	0.8142	254.879	0.8896	57354	0.679	1.7224	0.646	0.7072	0.0071	0.0041	0.5002	0.8615	212.699	206.796	195.207	21.0986	21.604	21.0326	-0.7421	-0.6235	-0.3068	2.8825	2.7953	2.6517	Kirmizi_Pistachio
53343	1788.26	389.961	201.971	0.8554	260.612	0.8661	61591	0.6735	1.9308	0.2096	0.6683	0.0073	0.0038	0.4466	0.8623	198.561	190.824	177.324	22.7518	23.6246	32.7968	-0.2105	0.0048	-0.723	2.2464	2.1058	3.906	Kirmizi_Pistachio
71995	1761	419.268	232.677	0.8319	302.765	0.8792	81891	0.6632	1.8019	0.2917	0.7221	0.0058	0.0032	0.5215	0.9397	203.865	188.372	171.009	20.9248	21.7703	23.0999	-0.0281	0.1039	0.2381	2.29	2.6057	3.4897	Kirmizi_Pistachio
76947	1133.43	458.21	223.773	0.8726	313.005	0.9571	80393	0.7789	2.0477	0.7527	0.6831	0.006	0.0029	0.4666	0.9555	219.277	212.142	198.478	22.5232	24.1977	26.2759	-0.7275	-0.6028	-0.4472	2.8632	2.7081	2.5755	Kirmizi_Pistachio
67928	1228.87	404.611	215.832	0.8458	294.089	0.9508	71440	0.7005	1.8747	0.5653	0.7268	0.006	0.0032	0.5283	0.9904	200.806	190.123	172.397	16.3155	18.3489	23.3978	-0.0943	0.1803	0.4913	3.0383	2.8773	2.9043	Kirmizi_Pistachio
71513	1166.86	436.552	209.949	0.8768	301.75	0.9771	73186	0.7331	2.0793	0.66	0.6912	0.0061	0.0029	0.4778	0.9934	212.654	201.379	191.959	17.6955	19.7048	26.1549	-0.6707	-0.2002	0.1051	3.9693	3.5751	2.9743	Kirmizi_Pistachio
89986	1200.24	490.975	240.729	0.8715	338.487	0.9879	91092	0.7164	2.0395	0.785	0.6894	0.0055	0.0027	0.4753	0.9694	227.731	224.748	207.275	21.9638	23.2789	25.3014	-0.5708	-0.4122	0.1984	2.9212	2.5264	2.3357	Kirmizi_Pistachio
68690	1393.83	404.297	230.195	0.8221	295.734	0.9094	75536	0.7537	1.7563	0.4443	0.7315	0.0059	0.0034	0.5351	0.9397	208.106	199.34	180.515	23.2731	24.3192	35.0351	-0.314	-0.3943	-1.2379	2.1907	2.269	4.7631	Kirmizi_Pistachio
78956	1359.85	441.049	235.994	0.8448	317.065	0.9303	84867	0.6767	1.8689	0.5366	0.7189	0.0056	0.003	0.5168	0.9658	214.525	202.659	183.948	25.9622	25.7001	23.835	-0.4949	-0.4817	-0.3587	2.086	2.0982	2.2512	Kirmizi_Pistachio
69497	1277.69	460.322	200.845	0.8998	297.466	0.9308	74663	0.7297	2.2919	0.535	0.6462	0.0066	0.0029	0.4176	0.9571	216.119	207.477	199.161	23.399	24.3111	24.8003	-0.6344	-0.7583	-0.8674	2.747	2.7941	2.9438	Kirmizi_Pistachio
54322	1569.2	363.687	217.176	0.8021	262.992	0.8557	63481	0.6645	1.6746	0.2772	0.7231	0.0067	0.004	0.5229	0.8757	211.217	202.708	186.43	25.5132	26.767	24.0017	-0.4414	-0.3966	-0.2201	2.0221	2.0103	2.2274	Kirmizi_Pistachio
68539	1078.83	445.563	197.196	0.8967	295.409	0.9815	69829	0.7889	2.2595	0.74	0.663	0.0065	0.0029	0.4396	0.9932	214.604	206.387	214.53	20.8156	22.1123	23.7214	-0.5743	-0.3119	-0.3248	3.3396	3.004	2.7318	Kirmizi_Pistachio
67387	1222.6	467.5	191.142	0.9126	292.916	0.9294	72505	0.7272	2.4458	0.5665	0.6266	0.0069	0.0028	0.3926	0.9602	213.791	202.286	194.157	23.0859	24.6204	22.9047	-0.4856	-0.3874	-0.3988	2.3877	2.3057	2.3397	Kirmizi_Pistachio
77119	1135.41	473.295	209.406	0.8968	313.354	0.991	77817	0.7429	2.2602	0.7517	0.6621	0.0061	0.0027	0.4383	0.9907	219.375	213.71	200.935	22.4875	21.4992	18.1944	-0.8065	-0.736	-0.2186	2.8171	2.8095	3.2113	Kirmizi_Pistachio
74256	1218.85	455.605	212.767	0.8843	307.483	0.9676	76740	0.7174	2.1413	0.6281	0.6749	0.0061	0.0029	0.4555	0.9753	226.617	217.41	200.341	23.6177	24.535	23.8179	-0.9715	-0.96	-0.8536	3.1078	3.0161	2.7172	Kirmizi_Pistachio
86721	1959.52	475.812	236.717	0.8675	332.29	0.9353	92724	0.7245	2.0101	0.2838	0.6984	0.0055	0.0027	0.4877	0.9803	210.48	204.278	192.073	21.111	21.829	22.9706	-0.6443	-0.5808	-0.3048	2.8896	2.8819	2.8035	Kirmizi_Pistachio
55095	1826.86	374.595	288.082	0.6392	264.857	0.6802	81002	0.5585	1.3003	0.2074	0.707	0.0068	0.0052	0.4999	0.65	207.872	189.033	163.174	19.3982	19.4961	16.9421	-0.5025	-0.366	0.0392	2.4817	2.5059	2.6853	Kirmizi_Pistachio
62610	1135.99	403.522	223.832	0.8321	282.343	0.8782	71296	0.6953	1.8028	0.6097	0.6997	0.0064	0.0036	0.4896	0.8826	204.48	191.832	186.697	26.8486	27.7184	20.9734	-0.3542	-0.4191	-0.0865	1.6656	1.7735	1.668	Kirmizi_Pistachio
73292	1119.11	423.982	231.456	0.8378	305.48	0.9152	80083	0.7049	1.8318	0.7354	0.7205	0.0058	0.0032	0.5191	0.9509	210.729	200.533	189.125	22.8585	23.1451	18.6525	-0.6732	-0.7432	-0.742	2.542	2.652	2.9814	Kirmizi_Pistachio
76453	1172.92	433.033	230.867	0.846	311.998	0.9612	79538	0.639	1.8757	0.6983	0.7205	0.0057	0.003	0.5191	0.9737	209.578	196.038	178.894	15.8184	15.8882	15.1363	-1.2021	-1.0352	0.0573	4.4904	4.4434	4.2179	Kirmizi_Pistachio
85379	1200.44	495.114	220.85	0.895	329.709	0.9868	86525	0.7403	2.2419	0.7445	0.6659	0.0058	0.0026	0.4435	0.9942	214.704	203.83	183.904	19.6979	19.0814	17.1319	-1.0483	-0.9603	-0.7939	3.6785	3.572	3.5624	Kirmizi_Pistachio
74337	1080.27	429.09	223.661	0.8534	307.651	0.9858	75405	0.76	1.9185	0.8005	0.717	0.0058	0.003	0.5141	0.9862	229.475	222.596	207.285	21.6145	22.1439	20.4687	-1.4884	-1.5049	-1.3774	4.7905	4.7944	4.6978	Kirmizi_Pistachio
56651	1036.16	390.876	187.406	0.8776	268.571	0.9672	58572	0.7012	2.0857	0.6631	0.6871	0.0069	0.0033	0.4721	0.9847	193.47	181.117	165.163	16.5826	16.6555	16.8815	0.2002	0.654	1.4791	4.0692	4.7977	7.1095	Kirmizi_Pistachio
70597	1551.97	445.281	208.022	0.8842	299.811	0.9633	73283	0.7277	2.1405	0.3683	0.6733	0.0063	0.0029	0.4533	0.9704	222.563	217.337	198.109	26.858	29.0866	28.7557	-0.5511	-0.3874	-0.122	2.341	2.1332	1.8153	Kirmizi_Pistachio
79458	1183.89	459.174	223.291	0.8738	318.071	0.9728	81682	0.7398	2.0564	0.7124	0.6927	0.0058	0.0028	0.4798	0.9867	227.362	216.058	203.917	23.9935	23.9657	22.7136	-1.0946	-1.0915	-0.9642	3.4102	3.3346	3.0137	Kirmizi_Pistachio
76571	1231.61	453.324	217.54	0.8773	312.239	0.9767	78400	0.7613	2.0839	0.6344	0.6888	0.0059	0.0028	0.4744	0.9886	206.83	198.386	187.971	18.9176	19.6346	21.3128	-0.5825	-0.4015	-0.3449	3.1365	2.847	2.6594	Kirmizi_Pistachio
68194	1239.11	471.026	194.78	0.9105	294.665	0.9182	74272	0.7073	2.4182	0.5581	0.6256	0.0069	0.0029	0.3914	0.9464	188.114	177.412	172.262	12.8708	13.5443	14.3561	-0.4388	-0.4335	-0.2359	2.9664	2.9345	3.3529	Kirmizi_Pistachio
74838	1098.34	434.647	221.921	0.8598	308.685	0.9845	76018	0.7482	1.9586	0.7796	0.7102	0.0058	0.003	0.5044	0.9879	229.98	221.197	208.955	21.9573	22.4961	22.6845	-1.4501	-1.1877	-0.4949	4.731	4.1241	3.2615	Kirmizi_Pistachio
67456	1056	394.296	224.481	0.8221	293.066	0.9514	70900	0.7542	1.7565	0.7602	0.7433	0.0058	0.0033	0.5524	0.9704	215.165	203.024	200.788	24.8464	25.7554	24.274	-0.6713	-0.6343	-0.5111	2.2934	2.2656	2.1992	Kirmizi_Pistachio
75257	1154.84	437.714	221.279	0.8628	309.548	0.9861	76315	0.7741	1.9781	0.7091	0.7072	0.0058	0.0029	0.5001	0.9893	210.426	200.63	182.699	20.6866	20.5311	19.9997	-0.6185	-0.3977	-0.0636	2.9103	2.6783	2.7392	Kirmizi_Pistachio
90408	2078.29	497.074	244.307	0.8709	339.28	0.9315	97059	0.7609	2.0346	0.263	0.6826	0.0055	0.0027	0.4659	0.9479	204.744	191.031	173.352	19.0046	20.769	23.6128	0.0763	0.1891	0.444	3.0138	3.2152	3.4603	Kirmizi_Pistachio
63409	1870.82	425.02	228.595	0.843	284.139	0.8309	76317	0.6796	1.8593	0.2277	0.6685	0.0067	0.0036	0.4469	0.831	196.816	182.904	173.094	17.0581	17.5797	18.7113	-0.283	-0.1717	0.1702	2.2633	2.1668	2.1457	Kirmizi_Pistachio
82936	1243.28	479.091	225.247	0.8826	324.957	0.9603	86369	0.7529	2.127	0.6742	0.6783	0.0058	0.0027	0.4601	0.9785	226.006	213.105	192.021	25.3858	25.5477	25.5041	-0.8746	-0.8298	-0.5964	2.7053	2.6915	2.4791	Kirmizi_Pistachio
90363	1287.45	525.784	220.568	0.9078	339.196	0.9769	92503	0.7185	2.3838	0.6851	0.6451	0.0058	0.0024	0.4162	0.9921	221.465	215.607	208.363	26.5629	28.955	30.0805	-0.5623	-0.454	-0.3421	2.2629	2.1292	2.1531	Kirmizi_Pistachio
78094	1268.46	446.725	225.948	0.8627	315.329	0.9691	80585	0.7611	1.9771	0.6099	0.7059	0.0057	0.0029	0.4982	0.9851	203.176	192.858	176.07	20.0446	20.529	21.8102	-0.4916	-0.4541	0.008	2.3937	2.5091	2.7105	Kirmizi_Pistachio
66860	1065.32	423.379	208.844	0.8699	291.768	0.9559	69941	0.7317	2.0272	0.7403	0.6891	0.0063	0.0031	0.4749	0.9628	227.464	222.275	206.992	28.5735	30.7416	28.0564	-0.7875	-0.6717	-0.3421	2.4185	2.2989	1.9411	Kirmizi_Pistachio
68290	1236.18	439.627	200.108	0.8904	294.872	0.9673	70597	0.7652	2.1969	0.5616	0.6707	0.0064	0.0029	0.4499	0.9884	228.317	217.149	179.525	25.8404	27.2885	29.3617	-0.9461	-0.8359	-0.7615	2.8244	2.6158	2.566	Kirmizi_Pistachio
83401	1318.98	478.815	227.312	0.8801	325.867	0.9623	86667	0.7568	2.1064	0.6024	0.6806	0.0057	0.0027	0.4632	0.9756	212.863	203.612	198.642	22.4733	24.2715	24.4484	-0.1477	0.0197	0.1218	2.6355	2.5009	2.5707	Kirmizi_Pistachio
62796	1055.94	405.392	201.957	0.8671	282.762	0.9635	65176	0.7645	2.0073	0.7077	0.6975	0.0065	0.0032	0.4865	0.9766	210.426	200.124	181.988	20.8348	22.8535	25.7317	-0.2926	-0.1892	-0.1541	2.6584	2.4958	2.4358	Kirmizi_Pistachio
81270	1864.02	436.893	255.833	0.8106	321.677	0.9096	89346	0.7499	1.7077	0.2939	0.7363	0.0054	0.0031	0.5421	0.9258	228.711	217.655	194.115	29.0907	30.6134	27.47	-0.8	-0.6418	-0.5101	2.3317	2.22	2.2109	Kirmizi_Pistachio
80071	1202.45	450.941	235.65	0.8526	319.295	0.9428	84926	0.7005	1.9136	0.6959	0.7081	0.0056	0.0029	0.5014	0.9594	218.916	212.089	197.406	27.3239	30.204	30.2247	-0.4393	-0.3382	-0.1574	2.119	2.0454	1.9324	Kirmizi_Pistachio
69010	1833.72	432.702	243.454	0.8267	296.422	0.859	80335	0.5772	1.7773	0.2579	0.6851	0.0063	0.0035	0.4693	0.8341	202.481	193.878	178.283	21.0004	21.8135	19.5362	-0.2101	-0.0922	0.122	2.3036	2.4229	2.6304	Kirmizi_Pistachio
57026	1040.25	387.01	190.295	0.8708	269.458	0.9688	58864	0.7548	2.0337	0.6622	0.6963	0.0068	0.0033	0.4848	0.9859	198.646	190.303	193.351	16.7576	18.0215	18.114	-0.8077	-0.6866	-0.6539	3.0964	2.6876	2.9651	Kirmizi_Pistachio
76110	1667.95	425.349	238.612	0.8278	311.298	0.9381	81131	0.7722	1.7826	0.3438	0.7319	0.0056	0.0031	0.5356	0.9548	228.196	224.48	210.92	27.9223	30.8977	33.2166	-0.7124	-0.6531	-0.3607	2.3737	2.272	1.884	Kirmizi_Pistachio
82904	1191.81	456.096	236.948	0.8545	324.895	0.9623	86149	0.7795	1.9249	0.7334	0.7123	0.0055	0.0029	0.5074	0.9767	229.104	220.989	205.684	26.2461	28.1709	25.6757	-0.8311	-0.7715	-0.7632	2.6688	2.5769	2.6033	Kirmizi_Pistachio
92325	1471.15	466.413	259.096	0.8315	342.858	0.949	97287	0.7653	1.8002	0.5361	0.7351	0.0051	0.0028	0.5404	0.9727	221.923	212.932	200.267	24.6667	26.6628	25.0617	-0.46	-0.3202	0.139	2.5885	2.474	2.6334	Kirmizi_Pistachio
84604	1348.73	471.368	232.814	0.8695	328.209	0.963	87854	0.7676	2.0247	0.5845	0.6963	0.0056	0.0028	0.4848	0.9816	232.392	223.643	205.125	26.5103	29.4419	29.1253	-1.0792	-0.8756	-0.8508	3.0255	2.7233	2.6293	Kirmizi_Pistachio
95002	1276.77	488.195	253.013	0.8552	347.793	0.9652	98425	0.7135	1.9295	0.7323	0.7124	0.0051	0.0027	0.5075	0.9793	217.101	211.685	205.461	20.75	21.8125	24.8051	-1.053	-0.8749	-0.5015	3.675	3.3859	3.0227	Kirmizi_Pistachio
64272	1033.22	424.729	196.877	0.8861	286.066	0.9769	65795	0.7542	2.1573	0.7566	0.6735	0.0066	0.0031	0.4536	0.9786	226.398	219.347	195.183	23.0648	23.7814	25.2522	-1.1714	-1.1351	-0.872	3.5677	3.3342	2.77	Kirmizi_Pistachio
78938	1090.23	433.897	235.01	0.8406	317.028	0.9911	79648	0.7984	1.8463	0.8346	0.7307	0.0055	0.003	0.5339	0.9856	216.799	209.671	197.219	17.4994	17.8401	16.9909	-0.8596	-0.6609	-0.2016	3.9137	3.3237	3.1562	Kirmizi_Pistachio
72808	1109.91	438.487	220.97	0.8637	304.47	0.9757	74620	0.6996	1.9844	0.7427	0.6944	0.006	0.003	0.4821	0.9568	236.675	227.226	213.336	20.0201	20.3284	21.8464	-1.83	-1.5693	-0.8276	6.4067	5.7767	4.0004	Kirmizi_Pistachio
91873	1558.58	467.413	260.237	0.8307	342.018	0.9446	97257	0.7327	1.7961	0.4753	0.7317	0.0051	0.0028	0.5354	0.9617	227.079	217.169	197.292	25.1175	25.981	23.1476	-0.874	-0.9306	-0.8719	2.8794	3.0619	3.1887	Kirmizi_Pistachio
71304	1732.4	417.602	239.208	0.8197	301.309	0.8708	81887	0.679	1.7458	0.2986	0.7215	0.0059	0.0034	0.5206	0.9088	218.849	206.024	195.338	24.2228	24.2387	24.2633	-0.4099	-0.3955	-0.2729	2.4519	2.4462	2.3058	Kirmizi_Pistachio
78962	1318.65	462.068	218.926	0.8806	317.077	0.9704	81369	0.7631	2.1106	0.5707	0.6862	0.0059	0.0028	0.4709	0.9939	198.385	192.932	180.835	15.9593	16.2597	19.8109	-0.6466	-0.5585	0.1159	3.1888	3.0333	3.2363	Kirmizi_Pistachio
89192	2021.39	481.075	249.545	0.8549	336.991	0.9223	96702	0.6876	1.9278	0.2743	0.7005	0.0054	0.0028	0.4907	0.946	213.327	205.339	189.413	24.9301	26.1626	27.0952	-0.6523	-0.6128	-0.4432	2.2494	2.2173	2.0861	Kirmizi_Pistachio
80080	1156.5	464.908	225.634	0.8743	319.313	0.9533	84007	0.7604	2.0605	0.7524	0.6868	0.0058	0.0028	0.4717	0.972	219.765	211.134	202.561	21.7845	23.4918	23.1039	-0.8907	-0.7152	-0.4955	3.3229	3.0623	2.8662	Kirmizi_Pistachio
80745	1522.31	455.29	232.8	0.8594	320.636	0.9313	86705	0.7131	1.9557	0.4378	0.7042	0.0056	0.0029	0.496	0.97	200.23	191.436	179.552	19.0108	20.4818	22.7402	0.0233	0.1595	0.2197	3.0648	3.0706	3.0105	Kirmizi_Pistachio
72422	1426.1	442.708	216.596	0.8721	303.662	0.9328	77639	0.7058	2.0439	0.4475	0.6859	0.0061	0.003	0.4705	0.9616	208.918	196.274	181.296	17.3101	19.2591	16.3528	-0.6393	-0.5363	-0.4838	3.2375	2.7955	3.38	Kirmizi_Pistachio
86284	1267.06	476.071	237.72	0.8664	331.452	0.9496	90864	0.7507	2.0027	0.6754	0.6962	0.0055	0.0028	0.4847	0.9707	210.543	199.046	179.061	19.6702	19.5934	21.0777	-0.7975	-0.6062	0.2213	3.298	3.4173	4.2805	Kirmizi_Pistachio
59620	1055.39	374.576	206.53	0.8343	275.519	0.9506	62717	0.7288	1.8137	0.6726	0.7355	0.0063	0.0035	0.541	0.9812	215.573	205.451	192.66	22.2531	23.5753	24.7723	-0.4502	-0.2254	0.3255	2.8944	2.9162	2.8628	Kirmizi_Pistachio
61365	1042.77	416.772	190.99	0.8888	279.522	0.9785	62716	0.7165	2.1822	0.7092	0.6707	0.0068	0.0031	0.4498	0.9816	201.692	192.721	179.279	15.3367	15.5665	16.7052	-0.3976	-0.1698	0.4866	3.8909	4.1458	5.174	Kirmizi_Pistachio
68804	1261.62	403.339	227.869	0.8251	295.98	0.9297	74005	0.6052	1.7701	0.5432	0.7338	0.0059	0.0033	0.5385	0.9532	199.701	187.354	176.43	16.5204	17.7754	15.8842	-0.4572	-0.5569	-0.0539	2.8177	3.0466	3.7544	Kirmizi_Pistachio
68504	1116.09	416.689	214.495	0.8573	295.334	0.9556	71685	0.7397	1.9427	0.6911	0.7088	0.0061	0.0031	0.5023	0.9759	199.64	187.209	176.727	17.4781	18.5335	19.5805	0.2654	0.6064	0.4979	3.4468	3.6324	3.3334	Kirmizi_Pistachio
81306	1353.42	466.473	227.3	0.8732	321.748	0.9434	86187	0.7521	2.0522	0.5578	0.6897	0.0057	0.0028	0.4758	0.9764	189.983	180.893	178.099	21.4986	22.6442	21.586	0.5406	0.767	0.6749	2.8283	3.0202	2.769	Kirmizi_Pistachio
76945	1193.32	469.847	214.387	0.8898	313.001	0.9524	80789	0.7245	2.1916	0.679	0.6662	0.0061	0.0028	0.4438	0.9726	223.574	211.27	196.699	26.2396	26.5541	23.7049	-0.7495	-0.8172	-0.5748	2.6191	2.6852	2.3521	Kirmizi_Pistachio
79327	1638.4	430.3	262.603	0.7922	317.809	0.8779	90355	0.7083	1.6386	0.3714	0.7386	0.0054	0.0033	0.5455	0.8938	213.747	204.455	186.471	21.8628	22.9243	21.5564	-0.7641	-0.7149	-0.4328	2.7724	2.6939	2.3455	Kirmizi_Pistachio
84300	1205.76	477.22	229.833	0.8764	327.619	0.9635	87492	0.7257	2.0764	0.7286	0.6865	0.0057	0.0027	0.4713	0.9786	211.202	198.008	170.153	20.0553	20.3349	19.8262	-0.7117	-0.4315	0.0107	2.9655	2.7604	2.6493	Kirmizi_Pistachio
65504	1261.91	426.223	202.739	0.8796	288.795	0.9636	67975	0.7727	2.1023	0.5169	0.6776	0.0065	0.0031	0.4591	0.9652	208.087	197.227	182.157	27.6591	30.0389	28.5863	-0.0574	-0.0094	0.0601	1.7409	1.76	1.8016	Kirmizi_Pistachio
63914	1134.4	418.401	200.31	0.878	285.268	0.9619	66443	0.7432	2.0888	0.6241	0.6818	0.0065	0.0031	0.4649	0.971	214.448	204.98	187.106	24.9818	25.9392	24.9937	-0.6797	-0.648	-0.4988	2.3876	2.3461	2.2062	Kirmizi_Pistachio
91753	1176.76	444.549	264.139	0.8043	341.795	0.9882	92848	0.7676	1.683	0.8326	0.7689	0.0048	0.0029	0.5911	0.9949	220.66	210.657	185.635	24.2874	23.644	23.335	-0.9446	-0.9069	-0.7081	2.7733	2.5956	2.3428	Kirmizi_Pistachio
77086	1293.4	431.677	229.818	0.8465	313.287	0.9632	80035	0.7499	1.8783	0.5791	0.7257	0.0056	0.003	0.5267	0.9893	197.189	185.035	173.118	18.6637	19.3166	20.505	-0.082	0.2604	0.5991	2.8693	3.1876	3.6994	Kirmizi_Pistachio
82897	1239.44	467.144	237.144	0.8616	324.881	0.938	88375	0.7554	1.9699	0.6781	0.6955	0.0056	0.0029	0.4837	0.9528	221.458	206.077	196.315	25.2459	25.2052	29.6643	-0.6336	-0.6659	-0.9167	2.4361	2.5908	4.0269	Kirmizi_Pistachio
44735	1072.09	365.321	159.588	0.8995	238.66	0.9329	47952	0.7573	2.2891	0.4891	0.6533	0.0082	0.0036	0.4268	0.977	187.15	176.035	171.564	15.5628	16.1465	15.1227	-0.0504	0.0331	0.1506	2.3606	2.2897	2.4161	Kirmizi_Pistachio
87361	1205.89	474.187	235.921	0.8674	333.514	0.9856	88634	0.8063	2.0099	0.7549	0.7033	0.0054	0.0027	0.4947	0.9943	214.573	205.207	194.871	21.695	21.7465	22.1554	-0.671	-0.375	0.2181	3.073	2.8072	2.7974	Kirmizi_Pistachio
72705	1119.11	442.146	211.029	0.8787	304.255	0.9846	73844	0.7511	2.0952	0.7295	0.6881	0.0061	0.0029	0.4735	0.9921	215.526	206.051	195.887	21.9394	23.2698	23.0123	-0.763	-0.7386	-0.7925	2.7704	2.6742	2.9059	Kirmizi_Pistachio
57762	996.659	393.224	188.041	0.8782	271.192	0.9825	58791	0.7618	2.0912	0.7307	0.6897	0.0068	0.0033	0.4756	0.9946	220.916	210.949	191.433	25.9079	27.425	29.5251	-0.6614	-0.5471	-0.2237	2.3887	2.279	2.1263	Kirmizi_Pistachio
77915	1232.81	446.386	225.782	0.8627	314.967	0.9447	82480	0.7238	1.9771	0.6442	0.7056	0.0057	0.0029	0.4979	0.9843	218.217	208.265	191.38	25.8752	26.2884	25.6396	-0.7517	-0.724	-0.6698	2.4601	2.4708	2.6515	Kirmizi_Pistachio
81803	1163.31	455.402	229.101	0.8642	322.73	0.9795	83513	0.7209	1.9878	0.7596	0.7087	0.0056	0.0028	0.5022	0.9983	231.756	220.074	215.836	21.1038	22.6394	21.6222	-1.2887	-0.9508	-0.9051	4.6123	3.7764	3.4666	Kirmizi_Pistachio
81900	1172.31	467.223	226.33	0.8748	322.921	0.9841	83227	0.7592	2.0643	0.7489	0.6912	0.0057	0.0028	0.4777	0.9861	228.419	221.725	206.983	27.2103	28.9413	29.627	-0.8601	-0.7204	-0.4694	2.6814	2.4637	2.0726	Kirmizi_Pistachio
81082	1163.93	477.811	217.937	0.8899	321.305	0.9821	82563	0.7808	2.1924	0.7521	0.6725	0.0059	0.0027	0.4522	0.9914	229.069	212.84	188.686	23.9988	24.5231	23.647	-0.946	-0.8319	-0.8671	3.1077	2.8237	2.7166	Kirmizi_Pistachio
79748	1159.56	476.219	216.48	0.8907	318.651	0.9815	81252	0.7853	2.1998	0.7453	0.6691	0.006	0.0027	0.4477	0.9849	219.672	208.103	197.861	22.3326	23.1933	21.8586	-0.6587	-0.5081	-0.1074	3.0549	2.8563	2.7976	Kirmizi_Pistachio
86548	1246.34	499.315	224.232	0.8935	331.958	0.9801	88309	0.7504	2.2268	0.7001	0.6648	0.0058	0.0026	0.442	0.9842	227.419	221.139	202.156	28.8044	30.3353	28.5124	-0.9015	-0.7481	-0.6041	2.6253	2.376	2.2511	Kirmizi_Pistachio
54988	1080.31	407.401	176.632	0.9011	264.599	0.9541	57636	0.7449	2.3065	0.5921	0.6495	0.0074	0.0032	0.4218	0.9729	191.424	178.649	168.474	12.572	13.6784	16.0058	-0.3469	-0.0294	0.5855	3.5426	3.6171	5.0606	Kirmizi_Pistachio
74584	1157.67	441.414	225.862	0.8592	308.161	0.9393	79402	0.5748	1.9544	0.6993	0.6981	0.0059	0.003	0.4874	0.9525	204.869	191.1	183.993	16.8264	18.9165	18.3452	-0.2118	-0.1658	0.301	3.4542	3.4101	3.9176	Kirmizi_Pistachio
63599	1073.37	387.046	226.264	0.8113	284.564	0.9138	69595	0.6935	1.7106	0.6937	0.7352	0.0061	0.0036	0.5405	0.9247	232.452	226.552	215.867	26.0568	28.6916	25.1816	-1.1437	-1.0476	-0.6803	3.4192	3.3728	2.4954	Kirmizi_Pistachio
53978	1002.71	398.231	186.08	0.8841	262.158	0.907	59510	0.7322	2.1401	0.6747	0.6583	0.0074	0.0034	0.4334	0.9275	204.648	202.455	202.546	24.8426	25.9965	24.5894	-0.411	-0.2987	-0.2372	2.1417	2.1042	2.0081	Kirmizi_Pistachio
94982	1258.72	505.506	242.917	0.877	347.757	0.9766	97254	0.7928	2.081	0.7533	0.6879	0.0053	0.0026	0.4733	0.9848	230.24	222.79	206.893	24.2727	23.9347	23.347	-1.1012	-1.0972	-1.5179	3.4651	3.6641	6.0191	Kirmizi_Pistachio
79356	1126.1	456.162	225.513	0.8693	317.867	0.9888	80257	0.777	2.0228	0.7864	0.6968	0.0057	0.0028	0.4856	0.9822	229.355	230.899	216.088	26.6626	27.4263	26.6616	-1.1025	-1.0874	-0.6524	3.3158	3.1342	2.307	Kirmizi_Pistachio
92905	1646.53	457.856	266.942	0.8125	343.934	0.9448	98338	0.7177	1.7152	0.4306	0.7512	0.0049	0.0029	0.5643	0.9678	210.117	203.106	193.93	21.3432	22.3325	23.0924	-0.8892	-0.7728	-0.5846	2.887	2.7387	2.6818	Kirmizi_Pistachio
65583	1059.79	437.734	191.572	0.8991	288.969	0.987	66448	0.7247	2.285	0.7338	0.6601	0.0067	0.0029	0.4358	0.9958	214.929	207.133	200.475	22.1074	22.1713	23.8386	-0.7361	-0.647	-0.3841	2.865	2.5543	2.3749	Kirmizi_Pistachio
81160	1200.46	433.135	245.054	0.8246	321.459	0.9537	85101	0.7792	1.7675	0.7077	0.7422	0.0053	0.003	0.5508	0.9736	212.922	201.93	180.117	21.964	22.3763	23.5368	-0.7954	-0.5062	-0.0108	2.7144	2.6953	2.1499	Kirmizi_Pistachio
79291	1258.22	471.692	217.699	0.8871	317.736	0.9661	82073	0.7873	2.1667	0.6294	0.6736	0.0059	0.0027	0.4538	0.9832	220.463	204.769	178.994	26.9586	25.385	23.1778	-0.5062	-0.5171	-0.5589	2.1207	2.158	2.6273	Kirmizi_Pistachio
57084	1584.45	402.224	190.589	0.8806	269.595	0.8912	64055	0.7153	2.1104	0.2857	0.6703	0.007	0.0033	0.4493	0.9481	198.047	188.793	183.73	17.5134	18.0999	16.5221	-0.6763	-0.5883	-0.6446	2.7391	2.6264	2.9981	Kirmizi_Pistachio
78690	1160.58	435.472	240.454	0.8337	316.53	0.9206	85473	0.7261	1.811	0.7341	0.7269	0.0055	0.0031	0.5283	0.9568	214.286	201.958	185.323	22.9804	23.4607	22.9137	-0.5685	-0.5187	-0.4735	2.4389	2.406	2.6151	Kirmizi_Pistachio
60865	1004.74	405.051	198.579	0.8716	278.381	0.9643	63117	0.7268	2.0397	0.7576	0.6873	0.0067	0.0033	0.4723	0.9635	232.884	228.411	209.702	26.4029	27.5077	25.0832	-1.2086	-1.1369	-1.0287	3.5217	3.4342	3.1942	Kirmizi_Pistachio
80612	1197.54	483.217	216.389	0.8941	320.372	0.9816	82122	0.8032	2.2331	0.7064	0.663	0.006	0.0027	0.4396	0.9816	221.361	210.577	183.74	23.5643	22.4178	18.8575	-0.6498	-0.6665	-0.7675	2.8536	2.9089	3.1773	Kirmizi_Pistachio
84553	1306.97	421.289	270.128	0.7674	328.11	0.9347	90460	0.6635	1.5596	0.622	0.7788	0.005	0.0032	0.6066	0.946	196.13	187.448	178.2	19.287	20.4775	23.221	0.2344	0.545	0.6575	3.1107	3.5005	3.401	Kirmizi_Pistachio
69549	1129.28	467.156	193.068	0.9106	297.578	0.9697	71722	0.8026	2.4196	0.6853	0.637	0.0067	0.0028	0.4058	0.9818	200.33	187.445	187.001	16.319	16.9059	17.6362	0.0106	0.0725	-0.333	3.7713	3.9261	3.9622	Kirmizi_Pistachio
68113	1826.57	436.88	215.248	0.8702	294.49	0.91	74852	0.6598	2.0297	0.2565	0.6741	0.0064	0.0032	0.4544	0.9222	217.397	208.101	191.727	23.8013	24.6488	24.0361	-0.6566	-0.5842	-0.4614	2.7112	2.7039	2.9802	Kirmizi_Pistachio
68801	1090.82	449.002	198.472	0.897	295.973	0.9883	69617	0.7593	2.2623	0.7266	0.6592	0.0065	0.0029	0.4345	0.983	232.62	229.141	219.66	26.4151	28.5863	30.1861	-1.1745	-1.0664	-0.8223	3.45	3.1859	2.6994	Kirmizi_Pistachio
84364	1226.41	482.498	231.375	0.8775	327.743	0.9533	88500	0.7369	2.0853	0.7048	0.6793	0.0057	0.0027	0.4614	0.9622	231.916	226.832	211.031	24.7988	26.7474	26.1684	-0.9759	-0.8768	-0.5357	3.1764	3.0742	2.4669	Kirmizi_Pistachio
70892	1100.53	447.625	204.188	0.8899	300.437	0.9763	72616	0.7513	2.1922	0.7355	0.6712	0.0063	0.0029	0.4505	0.9876	214.345	203.532	185.534	20.5936	20.9203	20.7158	-0.852	-0.7764	-0.3982	3.3586	3.2461	3.226	Kirmizi_Pistachio
74171	1118.82	460.933	205.685	0.8949	307.307	0.9861	75220	0.7823	2.241	0.7446	0.6667	0.0062	0.0028	0.4445	0.9961	216.013	210.92	203.354	23.7484	25.7218	24.2895	-0.3597	-0.0967	-0.3008	2.7874	2.4444	2.2826	Kirmizi_Pistachio
75223	1086.85	429.936	224.681	0.8526	309.478	0.9846	76402	0.7717	1.9135	0.8002	0.7198	0.0057	0.003	0.5181	0.9915	228.6	222.705	201.19	25.4647	27.1303	25.6449	-0.8508	-0.6773	-0.593	2.8646	2.6495	2.4736	Kirmizi_Pistachio
71409	1686.64	443.952	226.79	0.8597	301.531	0.8661	82450	0.6591	1.9575	0.3154	0.6792	0.0062	0.0032	0.4613	0.903	198.015	182.603	165.894	17.9683	19.9097	20.089	-0.1844	-0.195	0.1006	2.2513	2.2216	3.0475	Kirmizi_Pistachio
76722	1600.19	464.14	231.334	0.8669	312.547	0.8693	88258	0.6772	2.0064	0.3765	0.6734	0.006	0.003	0.4535	0.9098	181.807	173.864	168.241	13.2537	14.3544	14.4764	0.1063	0.2655	0.1178	2.8163	2.7718	2.2572	Kirmizi_Pistachio
70645	1207.63	442.891	211.434	0.8787	299.913	0.9219	76626	0.704	2.0947	0.6087	0.6772	0.0063	0.003	0.4586	0.9606	203.022	191.58	182.217	17.6863	19.4591	19.9475	-0.4032	-0.4574	0.7513	3.5439	3.5379	5.6021	Kirmizi_Pistachio
60269	1421.12	414.719	220.341	0.8472	277.014	0.8448	71341	0.6884	1.8822	0.375	0.668	0.0069	0.0037	0.4462	0.8398	200.006	186.22	163.138	18.9489	19.419	18.1019	-0.3708	-0.3655	-0.1642	2.1866	2.3052	2.6493	Kirmizi_Pistachio
54674	1008.41	393.219	199.173	0.8622	263.843	0.8852	61767	0.6497	1.9743	0.6756	0.671	0.0072	0.0036	0.4502	0.8888	205.265	191.551	187.976	24.3017	26.0202	24.1691	-0.2826	-0.2538	-0.2644	1.9389	1.9162	2.1754	Kirmizi_Pistachio
78625	1400.43	447.732	229.513	0.8586	316.399	0.9528	82517	0.742	1.9508	0.5038	0.7067	0.0057	0.0029	0.4994	0.9742	198.401	187.573	170.06	13.7803	14.5886	14.8362	-0.657	-0.4675	-0.5127	3.5069	3.2611	3.6061	Kirmizi_Pistachio
72189	1184.42	462.627	208.597	0.8926	303.173	0.9282	77775	0.7361	2.2178	0.6466	0.6553	0.0064	0.0029	0.4295	0.9524	201.368	189.376	160.392	16.2131	16.8476	20.4516	-0.6191	-0.4417	0.15	3.1535	2.8673	2.839	Kirmizi_Pistachio
57747	1838.96	367.848	213.323	0.8147	271.156	0.8755	65958	0.6961	1.7244	0.2146	0.7371	0.0064	0.0037	0.5434	0.937	201.867	185.152	162.316	21.4985	22.5774	18.3269	-0.3782	-0.3646	-0.5697	1.8624	1.8435	2.7606	Kirmizi_Pistachio
72245	1148.29	436.44	221.46	0.8617	303.291	0.9496	76079	0.7413	1.9707	0.6885	0.6949	0.006	0.0031	0.4829	0.9517	217.781	202.677	177.34	23.5816	23.0104	20.1304	-0.7414	-0.7705	-0.7401	2.3595	2.4538	2.6496	Kirmizi_Pistachio
71434	1126.98	450.9	203.136	0.8928	301.584	0.9805	72855	0.7453	2.2197	0.7068	0.6688	0.0063	0.0028	0.4474	0.993	206.32	195.731	194.49	16.998	16.9808	18.0184	-1.1067	-0.9704	-0.7605	3.5429	3.533	3.2537	Kirmizi_Pistachio
78094	1874.49	433.688	254.111	0.8104	315.329	0.8875	87992	0.7048	1.7067	0.2793	0.7271	0.0056	0.0033	0.5287	0.9023	208.453	196.695	178.657	23.4521	23.7239	21.4358	-0.3774	-0.3312	-0.3124	2.2937	2.3179	2.4316	Kirmizi_Pistachio
77054	1266.54	458.051	223.984	0.8723	313.222	0.9522	80926	0.7347	2.045	0.6036	0.6838	0.0059	0.0029	0.4676	0.9563	213.241	200.68	176.55	19.6133	21.5742	22.9282	-0.6195	-0.3455	-0.2185	2.9486	2.7216	2.753	Kirmizi_Pistachio
70612	1084.69	425.27	216.622	0.8605	299.843	0.9783	72181	0.7603	1.9632	0.7542	0.7051	0.006	0.0031	0.4971	0.9759	219.3	205.872	192.417	20.6726	19.8274	19.8551	-1.196	-1.1734	-0.9502	3.5783	3.5899	3.5877	Kirmizi_Pistachio
62437	1032.28	385.82	209.206	0.8402	281.953	0.9852	63377	0.7059	1.8442	0.7363	0.7308	0.0062	0.0034	0.5341	0.9849	201.482	189.239	170.989	14.6468	15.4125	18.3035	0.0541	0.4091	1.3525	3.8716	3.9429	5.3818	Kirmizi_Pistachio
79713	1261.73	447.646	238.047	0.8469	318.581	0.9371	85061	0.6835	1.8805	0.6292	0.7117	0.0056	0.003	0.5065	0.9525	225.214	210.407	186.892	25.5496	25.8667	25.0974	-0.6877	-0.5075	-0.247	2.4572	2.4516	2.5027	Kirmizi_Pistachio
73418	1249.98	484.603	209.231	0.902	305.743	0.8987	81696	0.7241	2.3161	0.5905	0.6309	0.0066	0.0028	0.3981	0.9219	219.533	207.324	193.507	22.0039	23.9005	24.8042	-0.6664	-0.4746	-0.3113	3.0137	2.875	2.8138	Kirmizi_Pistachio
93787	1260.24	497.083	244.3	0.8709	345.562	0.9717	96522	0.7703	2.0347	0.7421	0.6952	0.0053	0.0026	0.4833	0.9833	225.082	213.732	197.829	26.1252	26.8678	25.7192	-0.7436	-0.7255	-0.6909	2.4447	2.4528	2.5464	Kirmizi_Pistachio
71087	2173.25	454.232	217.967	0.8773	300.85	0.883	80510	0.7116	2.0839	0.1891	0.6623	0.0064	0.0031	0.4387	0.9142	220.411	206.913	189.327	23.8049	24.9784	20.746	-0.6388	-0.7297	-0.4774	2.5299	2.7375	2.5097	Kirmizi_Pistachio
86596	1173.93	471.115	239.354	0.8613	332.05	0.9593	90270	0.7356	1.9683	0.7896	0.7048	0.0054	0.0028	0.4968	0.9778	223.07	208.839	182.185	21.1945	20.7128	19.9602	-0.9621	-1.0244	-1.0075	3.2542	3.3704	3.5104	Kirmizi_Pistachio
85590	1173.71	470.452	235.621	0.8655	330.116	0.9888	86560	0.6567	1.9966	0.7808	0.7017	0.0055	0.0028	0.4924	0.9831	206.768	195.432	181.924	18.5947	19.3405	19.6618	-0.3613	-0.2878	-0.1571	2.3537	2.2429	2.2746	Kirmizi_Pistachio
79357	1139.98	473.589	217.435	0.8884	317.869	0.9794	81024	0.7743	2.1781	0.7674	0.6712	0.006	0.0027	0.4505	0.9812	238.753	235.455	225.852	23.7142	25.5829	23.9399	-1.693	-1.5722	-1.1998	5.0809	4.7224	3.7715	Kirmizi_Pistachio
80716	1258.94	478.23	224.693	0.8828	320.579	0.9295	86835	0.7051	2.1284	0.64	0.6703	0.0059	0.0028	0.4494	0.9564	223.212	211.24	193.74	26.3592	28.2241	29.84	-0.5254	-0.3921	-0.2978	2.1812	2.1066	1.9289	Kirmizi_Pistachio
73239	1192.73	428.324	226.203	0.8492	305.37	0.9404	77878	0.7257	1.8935	0.6469	0.7129	0.0058	0.0031	0.5083	0.9625	216.38	197.262	173.176	22.8472	23.4447	22.7046	-0.3253	-0.3249	-0.2699	2.1746	2.1843	2.2608	Kirmizi_Pistachio
96395	1352.67	515.873	246.595	0.8784	350.334	0.9549	100950	0.7428	2.092	0.662	0.6791	0.0054	0.0026	0.4612	0.9648	219.868	210.364	190.573	24.2619	25.2283	25.5021	-0.6887	-0.6087	-0.6453	2.4218	2.2979	2.5496	Kirmizi_Pistachio
72202	1085.22	429.569	215.8	0.8647	303.2	0.9805	73635	0.7494	1.9906	0.7704	0.7058	0.0059	0.003	0.4982	0.9917	211.38	203.149	190.465	20.5686	21.3763	20.5625	-0.1181	-0.1643	0.129	2.9019	2.9039	3.45	Kirmizi_Pistachio
72233	1106.07	429.051	217.618	0.8618	303.265	0.9719	74320	0.767	1.9716	0.742	0.7068	0.0059	0.003	0.4996	0.985	224.708	216.679	196.497	23.957	24.5496	25.1719	-0.7465	-0.5543	-0.1862	2.7199	2.6156	2.4964	Kirmizi_Pistachio
89367	1268.27	507.313	226.368	0.8949	337.321	0.9856	90672	0.7587	2.2411	0.6982	0.6649	0.0057	0.0025	0.4421	0.9908	230.558	221.146	206.968	23.6786	24.3469	23.6588	-0.9574	-0.8172	-0.6041	3.1164	2.9547	2.7099	Kirmizi_Pistachio
79791	1154.02	483.251	212.678	0.8979	318.737	0.9879	80766	0.7886	2.2722	0.7529	0.6596	0.0061	0.0027	0.435	0.9885	231.716	229.157	219.593	24.0279	25.9551	27.7303	-1.1255	-0.9677	-0.687	3.5168	3.0485	2.4609	Kirmizi_Pistachio
74737	1059.75	415.56	232.827	0.8283	308.477	0.9864	75768	0.7707	1.7848	0.8363	0.7423	0.0056	0.0031	0.551	0.9835	208.678	197.772	183.663	21.2887	21.4449	20.714	-0.4862	-0.3588	-0.1293	2.273	2.1551	2.0734	Kirmizi_Pistachio
84303	1525.22	485.094	244.63	0.8635	327.625	0.8893	94802	0.6736	1.983	0.4554	0.6754	0.0058	0.0029	0.4561	0.9045	222.449	216.621	198.046	29.608	32.7772	35.7268	-0.5262	-0.4242	-0.3283	2.0326	1.9991	2.596	Kirmizi_Pistachio
72013	1097.86	413.699	227.891	0.8346	302.803	0.9729	74018	0.7559	1.8153	0.7508	0.7319	0.0057	0.0032	0.5357	0.9725	221.459	209.103	186.316	23.801	24.6728	24.1743	-0.7481	-0.7331	-0.7078	2.64	2.5933	2.655	Kirmizi_Pistachio
86321	1735.7	462.156	255.622	0.8331	331.523	0.9185	93981	0.7187	1.808	0.3601	0.7173	0.0054	0.003	0.5146	0.9303	220.378	209.925	193.418	20.6161	21.9333	21.5234	-1.0043	-0.9604	-0.8582	3.2368	3.172	4.1658	Kirmizi_Pistachio
80235	1178.36	469.106	226.941	0.8752	319.622	0.9434	85047	0.77	2.0671	0.7261	0.6813	0.0058	0.0028	0.4642	0.9596	214.544	203.538	191.3	15.897	16.5137	17.206	-0.9617	-0.6694	0.2357	4.3588	4.2452	4.6596	Kirmizi_Pistachio
70339	2256.51	440.039	224.3	0.8603	299.263	0.8635	81461	0.6115	1.9618	0.1736	0.6801	0.0063	0.0032	0.4625	0.9074	198.877	186.811	177.411	14.7365	16.0616	18.1768	-0.0539	0.1363	0.8968	4.0131	4.0132	4.8343	Kirmizi_Pistachio
88620	1236.83	507.957	230.102	0.8915	335.908	0.9564	92660	0.6952	2.2075	0.728	0.6613	0.0057	0.0026	0.4373	0.9654	215.8	209.065	199.931	20.6596	22.0613	22.1574	-0.7874	-0.6892	-0.1154	3.1311	3.0278	2.9901	Kirmizi_Pistachio
78903	1184.85	463.536	220.786	0.8793	316.958	0.9724	81139	0.6552	2.0995	0.7063	0.6838	0.0059	0.0028	0.4676	0.9816	223.88	213.839	189.806	25.4622	26.8873	27.0768	-0.685	-0.5502	-0.4628	2.3983	2.1979	2.107	Kirmizi_Pistachio
64776	1250.55	452.933	192.892	0.9048	287.185	0.9093	71240	0.7079	2.3481	0.5205	0.6341	0.007	0.003	0.402	0.944	219.213	205.012	180.043	25.6175	25.9352	24.3175	-0.5394	-0.5451	-0.5477	2.1179	2.1723	2.384	Kirmizi_Pistachio
83960	1136.79	452.429	237.818	0.8507	326.957	0.9915	84680	0.7581	1.9024	0.8164	0.7227	0.0054	0.0028	0.5223	0.9935	216.856	211.073	203.256	22.6251	22.6206	21.1146	-0.7691	-0.5992	-0.4132	2.8107	2.5207	2.498	Kirmizi_Pistachio
83176	1142.56	442.991	241.236	0.8387	325.427	0.9787	84990	0.7657	1.8363	0.8007	0.7346	0.0053	0.0029	0.5397	0.991	214.269	202.559	192.059	17.6247	18.4353	18.0414	-0.7757	-0.5927	-0.1693	3.4812	3.2794	3.0915	Kirmizi_Pistachio
77146	1344.25	438.564	230.051	0.8514	313.409	0.9329	82697	0.6922	1.9064	0.5365	0.7146	0.0057	0.003	0.5107	0.9736	217.43	207.341	185.634	23.6865	24.5019	26.4233	-0.3471	-0.316	-0.3911	2.3308	2.4521	3.1282	Kirmizi_Pistachio
71775	1701.83	414.836	244.176	0.8084	302.303	0.9018	79590	0.616	1.6989	0.3114	0.7287	0.0058	0.0034	0.531	0.9022	201.963	187.671	167.861	17.6499	19.1799	22.3631	-0.3571	-0.1428	0.2738	2.5567	2.5805	3.0488	Kirmizi_Pistachio
81164	1267.27	500.296	209.692	0.9079	321.467	0.9709	83598	0.6931	2.3859	0.6351	0.6426	0.0062	0.0026	0.4129	0.9851	221.037	213.47	164.137	22.603	24.548	17.7887	-0.8626	-0.6454	-0.4313	2.8422	2.4977	3.124	Kirmizi_Pistachio
54254	947.662	389.276	180.743	0.8857	262.828	0.9854	55056	0.7703	2.1537	0.7592	0.6752	0.0072	0.0033	0.4559	0.9818	219.574	200.129	171.05	17.8404	16.9474	17.7218	-1.382	-1.2595	-0.6608	4.4155	4.2803	3.4361	Kirmizi_Pistachio
68598	1468.62	452.215	197.62	0.8995	295.536	0.9551	71824	0.6435	2.2883	0.3997	0.6535	0.0066	0.0029	0.4271	0.9773	209.397	196.757	177.139	20.8322	20.8683	22.0023	-0.329	-0.2591	-0.1413	2.2706	2.3944	2.9363	Kirmizi_Pistachio
79176	1128.79	430.739	238.624	0.8325	317.506	0.9834	80510	0.7437	1.8051	0.7809	0.7371	0.0054	0.003	0.5433	0.9808	223.942	219.221	198.433	22.8788	23.3763	21.5977	-1.145	-1.1585	-1.1367	3.6028	3.5423	3.4124	Kirmizi_Pistachio
70402	1604.96	398.42	278.003	0.7163	299.397	0.8202	85838	0.617	1.4332	0.3435	0.7515	0.0057	0.0039	0.5647	0.8093	198.353	181.411	155.195	15.233	16.4371	22.0907	-0.2215	-0.2257	-1.2706	2.3788	2.2983	5.2551	Kirmizi_Pistachio
66493	1396.19	396.002	223.73	0.8251	290.966	0.9383	70867	0.7181	1.77	0.4286	0.7348	0.006	0.0034	0.5399	0.9556	207.932	196.954	177.511	19.7069	20.8463	20.2044	-0.4768	-0.483	-0.1858	2.4822	2.4393	2.7424	Kirmizi_Pistachio
81647	1121.62	448.599	235.948	0.8505	322.422	0.9835	83017	0.7656	1.9013	0.8156	0.7187	0.0055	0.0029	0.5166	0.9821	213.83	207.131	196.941	19.8871	22.4067	20.9518	-0.1065	0.0446	0.3072	2.8587	2.5781	2.7894	Kirmizi_Pistachio
62848	1955.83	447.412	218.463	0.8727	282.879	0.8199	76656	0.6512	2.048	0.2065	0.6323	0.0071	0.0035	0.3997	0.8187	203.53	193.267	177.339	20.1981	20.772	20.0684	-0.3864	-0.3414	-0.3316	2.1543	2.1038	2.2007	Kirmizi_Pistachio
62370	1025.72	403.477	204.039	0.8627	281.801	0.9454	65970	0.68	1.9774	0.745	0.6984	0.0065	0.0033	0.4878	0.9646	225.029	214.336	197.269	24.9067	27.5698	28.0905	-0.7372	-0.7081	-0.6021	2.502	2.4909	2.3433	Kirmizi_Pistachio
56575	962.101	384.098	190.451	0.8684	268.391	0.9783	57831	0.7564	2.0168	0.7681	0.6988	0.0068	0.0034	0.4883	0.9847	218.886	207.03	192.45	22.4225	22.892	23.2635	-0.7097	-0.5895	-0.4954	2.6041	2.4454	2.6797	Kirmizi_Pistachio
90838	1238.42	482.346	247.187	0.8587	340.086	0.9773	92946	0.7127	1.9513	0.7443	0.7051	0.0053	0.0027	0.4971	0.97	212.831	198.545	173.335	18.2385	17.8179	18.2159	-0.3557	-0.0128	0.5186	2.9053	3.3426	3.8277	Kirmizi_Pistachio
67535	1253.83	371.527	235.661	0.7731	293.238	0.9634	70101	0.7585	1.5765	0.5398	0.7893	0.0055	0.0035	0.623	0.9821	206.366	190.455	166.957	17.9182	18.2108	19.4268	-0.1668	-0.0417	0.3213	2.3851	2.2398	2.6099	Kirmizi_Pistachio
65314	1079.35	411.734	210.494	0.8594	288.375	0.9271	70446	0.7379	1.956	0.7045	0.7004	0.0063	0.0032	0.4906	0.9595	231.327	216.028	189.819	24.8301	26.4046	25.1591	-0.8973	-0.6743	-0.6042	2.6793	2.5421	2.5646	Kirmizi_Pistachio
44718	1162.81	369.399	169.806	0.8881	238.614	0.8659	51643	0.5655	2.1754	0.4156	0.646	0.0083	0.0038	0.4173	0.9077	199.967	189.984	184.265	16.4157	17.2177	15.1281	-0.3574	-0.2857	-0.2052	2.4552	2.4166	2.5557	Kirmizi_Pistachio
77283	1172.9	415.699	239.368	0.8176	313.687	0.9693	79729	0.712	1.7367	0.7059	0.7546	0.0054	0.0031	0.5694	0.9889	228.955	222.473	208.816	23.471	24.354	23.1362	-0.9996	-0.9307	-1.0431	3.3433	3.2708	3.8521	Kirmizi_Pistachio
61760	1052.69	419.759	194.22	0.8865	280.42	0.9623	64178	0.6986	2.1612	0.7003	0.6681	0.0068	0.0031	0.4463	0.9645	220.68	211.432	197.201	23.3467	23.1251	20.6664	-0.8625	-0.8906	-0.8955	2.6096	2.6937	2.9622	Kirmizi_Pistachio
50352	1054.48	391.344	170.92	0.8996	253.2	0.9461	53221	0.6777	2.2896	0.5691	0.647	0.0078	0.0034	0.4186	0.9585	202.89	186.38	181.09	16.6701	17.5381	22.751	-0.2722	-0.0524	-0.1655	2.1972	2.2541	2.3272	Kirmizi_Pistachio
77564	1167.13	459.454	219.895	0.878	314.257	0.9632	80531	0.7834	2.0894	0.7155	0.684	0.0059	0.0028	0.4678	0.9775	225.656	211.19	199.368	22.4792	22.4151	21.3338	-0.7395	-0.6148	-0.4906	2.7235	2.6396	2.8874	Kirmizi_Pistachio
83507	1324.46	474.409	226.482	0.8787	326.074	0.9718	85929	0.7389	2.0947	0.5982	0.6873	0.0057	0.0027	0.4724	0.9896	217.634	209.003	196.405	21.5585	22.949	25.185	-0.7722	-0.6554	-0.5069	2.7396	2.6676	2.9563	Kirmizi_Pistachio
74839	1133.67	450.027	218.266	0.8745	308.688	0.965	77556	0.6936	2.0618	0.7318	0.6859	0.006	0.0029	0.4705	0.9701	218.555	209.683	196.339	16.8554	18.0075	19.1516	-0.9194	-0.4939	-0.1273	4.2244	3.5077	2.8635	Kirmizi_Pistachio
69661	2078.54	444.012	224.112	0.8633	297.817	0.8698	80087	0.6746	1.9812	0.2026	0.6707	0.0064	0.0032	0.4499	0.8913	225.118	212.396	198.711	26.9128	29.5568	26.2426	-0.5231	-0.4394	-0.3711	1.9631	1.9789	2.0039	Kirmizi_Pistachio
79964	1158.57	465.38	224.287	0.8762	319.082	0.9653	82842	0.7969	2.0749	0.7486	0.6856	0.0058	0.0028	0.4701	0.9754	233.1	217.697	208.379	24.3318	25.5024	25.3585	-1.0779	-0.6474	-0.7376	3.1475	2.7007	2.5169	Kirmizi_Pistachio
66725	1096.3	396.852	217.453	0.8365	291.474	0.9587	69598	0.7652	1.825	0.6977	0.7345	0.0059	0.0033	0.5394	0.9845	222.438	213.047	198.759	20.0879	21.7255	23.2332	-0.9517	-0.8007	-0.724	3.2149	2.9111	3.0386	Kirmizi_Pistachio
84525	1221.28	494.211	218.701	0.8968	328.056	0.9813	86140	0.6738	2.2598	0.7121	0.6638	0.0058	0.0026	0.4406	0.9957	220.917	212.438	201.635	19.0086	19.0669	19.5131	-0.9924	-0.7829	-0.5193	4.0321	3.7305	3.1957	Kirmizi_Pistachio
69626	1097.32	435.627	210.304	0.8758	297.743	0.9492	73355	0.7377	2.0714	0.7266	0.6835	0.0063	0.003	0.4671	0.9677	227.715	226.395	212.193	23.4904	24.6777	22.8562	-0.9441	-0.888	-0.6429	3.1174	2.9585	2.6292	Kirmizi_Pistachio
77557	1178.61	476.589	210.655	0.897	314.243	0.9667	80225	0.7594	2.2624	0.7016	0.6594	0.0061	0.0027	0.4348	0.9836	223.981	213.426	193.166	24.0581	24.4597	22.1041	-0.6438	-0.4437	-0.1739	2.5132	2.4711	2.5525	Kirmizi_Pistachio
74054	1111.73	448.397	212.215	0.8809	307.064	0.9858	75119	0.7601	2.1129	0.7529	0.6848	0.0061	0.0029	0.469	0.9909	225.297	215.943	190.659	24.0212	24.2434	22.4125	-0.6334	-0.5607	-0.464	2.4116	2.2931	2.3203	Kirmizi_Pistachio
82563	1185.69	481.744	224.586	0.8847	324.226	0.9756	84632	0.7388	2.145	0.738	0.673	0.0058	0.0027	0.453	0.9716	225.413	214.93	194.054	18.2387	18.33	18.4905	-1.0963	-0.8655	-0.1406	4.0649	3.7669	3.7119	Kirmizi_Pistachio
76590	1124.23	445.798	221.269	0.8681	312.278	0.981	78074	0.7755	2.0147	0.7615	0.7005	0.0058	0.0029	0.4907	0.9886	224.719	216.589	205.025	18.977	19.0836	16.5043	-1.371	-1.3205	-0.8793	4.2738	4.2061	4.3243	Kirmizi_Pistachio
73332	1996.53	460.344	234.478	0.8606	305.564	0.872	84093	0.7132	1.9633	0.2312	0.6638	0.0063	0.0032	0.4406	0.865	228.033	222.143	204.984	24.6069	27.4442	23.2555	-0.6968	-0.5382	-0.3082	2.6473	2.4516	2.1784	Kirmizi_Pistachio
75048	1157.53	456.054	211.596	0.8858	309.118	0.9836	76301	0.7517	2.1553	0.7039	0.6778	0.0061	0.0028	0.4594	0.9902	235.214	221.939	201.184	24.2104	24.075	23.7163	-1.1298	-0.9248	-0.5885	3.1266	2.8755	2.3608	Kirmizi_Pistachio
63415	1020.95	392.763	210.436	0.8444	284.152	0.9593	66105	0.7717	1.8664	0.7645	0.7235	0.0062	0.0033	0.5234	0.9769	227.387	219.356	197.722	25.5418	26.9784	28.1154	-0.7893	-0.6903	-0.4169	2.4431	2.2729	2.1661	Kirmizi_Pistachio
63770	1088.91	401.713	207.804	0.8558	284.947	0.9614	66333	0.6192	1.9331	0.6758	0.7093	0.0063	0.0033	0.5031	0.9726	202.004	190.741	182.407	14.3088	15.4038	15.58	-0.1604	-0.0234	0.1231	3.5051	3.2836	3.1533	Kirmizi_Pistachio
69856	1429.08	399.202	230.211	0.817	298.234	0.9406	74267	0.7307	1.7341	0.4298	0.7471	0.0057	0.0033	0.5581	0.9678	213.609	203.52	195.996	19.1811	21.3971	21.9946	-0.4934	-0.5111	0.0363	2.8252	2.8523	3.1583	Kirmizi_Pistachio
82341	1140.28	457.215	230.4	0.8638	323.79	0.9882	83328	0.7497	1.9844	0.7958	0.7082	0.0056	0.0028	0.5015	0.9952	233.851	227.182	209.516	22.8927	23.7549	25.7537	-1.3102	-1.0464	-0.7133	3.8625	3.3145	2.754	Kirmizi_Pistachio
82626	1162.74	450.015	238.953	0.8474	324.35	0.9648	85641	0.7177	1.8833	0.768	0.7208	0.0054	0.0029	0.5195	0.9783	231.86	217.99	192.572	21.5794	21.1644	20.1522	-1.0797	-0.7241	-0.1311	3.5412	3.4873	3.1143	Kirmizi_Pistachio
82517	1370.95	469.275	228.776	0.8731	324.136	0.9557	86344	0.7855	2.0512	0.5517	0.6907	0.0057	0.0028	0.4771	0.9786	222.247	215.455	201.451	24.4794	25.095	26.0695	-0.5438	-0.4981	-0.332	2.3617	2.3693	2.3337	Kirmizi_Pistachio
83202	1191.17	493.7	216.112	0.8991	325.478	0.9899	84049	0.5807	2.2845	0.7369	0.6593	0.0059	0.0026	0.4346	0.9929	240.048	235.398	213.025	21.1469	22.6322	21.9751	-1.6711	-1.3234	-1.0149	5.1503	4.0796	3.1176	Kirmizi_Pistachio
69837	1159.78	437.091	209.518	0.8776	298.193	0.9502	73501	0.6756	2.0862	0.6524	0.6822	0.0063	0.003	0.4654	0.971	218.033	198.646	172.502	19.1387	19.4143	16.8893	-0.5748	-0.5021	-0.1856	2.7083	2.77	3.2312	Kirmizi_Pistachio
60858	1111.11	417.889	191.674	0.8886	278.365	0.945	64397	0.7404	2.1802	0.6195	0.6661	0.0069	0.0031	0.4437	0.9674	209.955	197.697	181.493	19.3618	19.8097	17.7862	-0.6569	-0.5568	-0.609	2.4523	2.5074	3.117	Kirmizi_Pistachio
66024	1054.12	410.479	218.066	0.8472	289.939	0.9414	70133	0.6747	1.8824	0.7467	0.7063	0.0062	0.0033	0.4989	0.9391	230.549	219.487	211.263	23.3816	22.8267	23.4416	-1.0147	-0.7208	-0.5551	3.2476	3.0597	2.3975	Kirmizi_Pistachio
89368	1316.39	477.635	250.895	0.8509	337.323	0.9538	93701	0.7496	1.9037	0.6481	0.7062	0.0053	0.0028	0.4988	0.9495	222.447	214.713	199.165	22.3313	23.2008	22.5219	-0.8716	-0.8015	-0.5138	3.0914	3.0505	2.9814	Kirmizi_Pistachio
77937	1291.86	432.219	263.199	0.7932	315.012	0.9005	86550	0.6985	1.6422	0.5868	0.7288	0.0055	0.0034	0.5312	0.8723	205.792	192.168	183.06	19.2926	20.4829	20.1024	-0.2476	-0.1773	-0.0211	2.3069	2.4227	2.3122	Kirmizi_Pistachio
73903	1172.05	447.222	215.357	0.8764	306.751	0.9724	76000	0.7674	2.0767	0.6761	0.6859	0.0061	0.0029	0.4705	0.977	210.26	198.937	183.037	19.0998	20.1987	21.8413	-0.4161	-0.2651	0.1287	2.4498	2.3765	2.6906	Kirmizi_Pistachio
90290	1275.13	501.585	234.39	0.8841	339.059	0.9795	92181	0.7665	2.14	0.6978	0.676	0.0056	0.0026	0.4569	0.9778	221.587	207.214	185.835	20.0169	20.5093	23.8966	-0.8989	-0.6816	-0.0143	3.3813	3.2375	3.2209	Kirmizi_Pistachio
75617	1385.86	445.487	229.166	0.8575	310.288	0.9346	80907	0.6575	1.9439	0.4948	0.6965	0.0059	0.003	0.4851	0.9431	217.049	202.688	187.756	21.2556	22.9321	24.2503	-0.6497	-0.5061	-0.0239	2.6754	2.5841	3.0679	Kirmizi_Pistachio
76974	1808.19	436.113	250.864	0.818	313.06	0.8982	85694	0.7183	1.7384	0.2958	0.7178	0.0057	0.0033	0.5153	0.8958	218.422	205.312	179.516	23.0333	23.3157	27.9554	-0.1968	-0.1824	-0.9139	2.045	2.0286	5.0848	Kirmizi_Pistachio
67585	1496.23	413.291	220.758	0.8454	293.346	0.9099	74275	0.7371	1.8721	0.3794	0.7098	0.0061	0.0033	0.5038	0.9432	199.273	186.62	172.077	17.6538	17.434	16.7355	-0.0004	0.0574	-0.0692	2.1806	2.1665	2.7133	Kirmizi_Pistachio
84311	1403.01	453.067	242.495	0.8447	327.64	0.9331	90355	0.7574	1.8684	0.5382	0.7232	0.0054	0.0029	0.523	0.9771	213.47	200.621	185.207	21.8475	24.3886	28.4286	-0.0154	0.2345	0.5023	2.4332	2.626	2.7719	Kirmizi_Pistachio
81466	2140.44	470.1	256.027	0.8387	322.065	0.8619	94516	0.6497	1.8361	0.2235	0.6851	0.0058	0.0031	0.4694	0.8618	223.343	213.55	199.035	25.9441	27.3525	26.8173	-0.6505	-0.574	-0.5204	2.4459	2.3561	2.2012	Kirmizi_Pistachio
71046	2019.56	493.678	214.374	0.9008	300.763	0.8362	84963	0.6565	2.3029	0.2189	0.6092	0.0069	0.003	0.3712	0.8547	224.715	212.802	182.864	23.8743	23.155	25.8381	-1.0145	-1.0491	-0.4378	3.1837	3.2884	2.8281	Kirmizi_Pistachio
86482	1296.33	458.656	242.622	0.8486	331.832	0.9711	89057	0.7145	1.8904	0.6467	0.7235	0.0053	0.0028	0.5234	0.9895	219.433	208.759	197.987	23.8506	24.1282	21.6652	-0.9235	-0.7942	-0.7632	2.9983	2.7146	2.6261	Kirmizi_Pistachio
63007	2204.22	413.637	217.499	0.8506	283.237	0.8639	72937	0.7129	1.9018	0.163	0.6847	0.0066	0.0035	0.4689	0.8917	216.561	203.259	185.563	22.6075	24.8372	18.4609	-0.7126	-0.7943	-0.6277	2.7108	2.8981	3.3094	Kirmizi_Pistachio
82285	2069.01	457.337	250.115	0.8372	323.68	0.9108	90343	0.6417	1.8285	0.2415	0.7077	0.0056	0.003	0.5009	0.9159	209.56	198.858	184.285	23.9029	25.3912	26.7435	-0.1431	-0.0894	0.2736	2.4204	2.4863	2.7303	Kirmizi_Pistachio
74534	1233.4	478.278	204.078	0.9044	308.058	0.9419	79135	0.7421	2.3436	0.6157	0.6441	0.0064	0.0027	0.4149	0.9723	209.919	200.868	189.847	25.2108	28.2467	28.594	-0.0809	0.0877	-0.1246	2.3182	2.1018	2.3932	Kirmizi_Pistachio
70125	1243.53	426.826	217.609	0.8603	298.808	0.9231	75964	0.7147	1.9614	0.5699	0.7001	0.0061	0.0031	0.4901	0.9613	216.661	207.52	197.886	24.9338	26.3661	24.7006	-0.7005	-0.69	-0.5809	2.3177	2.3665	2.5138	Kirmizi_Pistachio
82025	1904.3	419.394	290.648	0.7209	323.168	0.8684	94460	0.6438	1.443	0.2842	0.7706	0.0051	0.0035	0.5938	0.8568	230.401	223.657	205.272	26.4897	29.8748	30.111	-0.9363	-0.8018	-0.5938	2.8416	2.5166	2.2133	Kirmizi_Pistachio
71585	2182.41	458.06	218.425	0.879	301.902	0.8589	83341	0.7119	2.0971	0.1889	0.6591	0.0064	0.0031	0.4344	0.911	200.597	188.546	176.008	17.2619	17.1508	15.7245	-0.6577	-0.5979	-0.4213	2.6035	2.5429	2.7638	Kirmizi_Pistachio
85543	1234.38	496.784	224.926	0.8916	330.025	0.9807	87229	0.6665	2.2087	0.7055	0.6643	0.0058	0.0026	0.4413	0.9747	212.924	202.098	188.175	18.789	18.4337	20.5645	-0.818	-0.4625	0.7964	3.7142	3.8457	4.6602	Kirmizi_Pistachio
71475	1172.89	427.111	214.32	0.865	301.67	0.9769	73163	0.7518	1.9929	0.6529	0.7063	0.006	0.003	0.4989	0.9942	226.8	215.515	193.584	26.8698	27.074	26.5438	-0.9448	-0.8247	-0.5457	2.7787	2.6085	2.3538	Kirmizi_Pistachio
83627	2016.89	468.279	266.845	0.8218	326.308	0.8749	95587	0.6689	1.7549	0.2583	0.6968	0.0056	0.0032	0.4856	0.8521	228.213	211.101	185.821	25.252	23.9659	23.2509	-0.8981	-0.874	-0.6297	2.833	2.8919	2.725	Kirmizi_Pistachio
72490	1180.12	461.019	205.347	0.8953	303.804	0.9714	74625	0.7192	2.2451	0.6541	0.659	0.0064	0.0028	0.4343	0.9749	230.104	219.581	202.963	27.6456	28.591	29.3715	-1.0212	-0.874	-0.768	2.8981	2.5957	2.4044	Kirmizi_Pistachio
55821	1343.99	407.678	179.304	0.8981	266.596	0.9101	61338	0.7086	2.2737	0.3883	0.6539	0.0073	0.0032	0.4276	0.9723	191.288	182.99	171.766	17.4258	17.8905	16.4183	-0.23	-0.1292	-0.1002	2.2844	2.2002	2.3975	Kirmizi_Pistachio
74663	1183.14	459.597	211.405	0.8879	308.324	0.9527	78374	0.77	2.174	0.6703	0.6709	0.0062	0.0028	0.4501	0.9784	222.524	216.537	202.209	22.0879	23.8644	26.8731	-0.779	-0.5329	-0.1668	3.2299	2.8414	2.5353	Kirmizi_Pistachio
88455	2006.81	477.361	243.766	0.8598	335.596	0.9525	92868	0.7091	1.9583	0.276	0.703	0.0054	0.0028	0.4942	0.9679	211.435	201.581	184.895	19.7429	20.1718	18.5237	-0.7348	-0.6279	0.3226	3.1574	3.3296	4.0624	Kirmizi_Pistachio
77174	1109.84	465.956	213.954	0.8883	313.466	0.9921	77787	0.8062	2.1778	0.7873	0.6727	0.006	0.0028	0.4526	0.9856	226.712	222.191	203.775	21.45	21.9481	22.5709	-0.9179	-0.6769	-0.2724	3.427	2.8722	3.0122	Kirmizi_Pistachio
77225	1100.79	426.265	247.101	0.8148	313.57	0.9368	82438	0.7536	1.7251	0.8009	0.7356	0.0055	0.0032	0.5411	0.9335	233.736	229.992	217.695	22.5596	23.075	22.6738	-1.2116	-1.0974	-0.8065	3.7259	3.6724	3.1185	Kirmizi_Pistachio
57936	1583.52	375.507	233.388	0.7834	271.6	0.8357	69323	0.6771	1.6089	0.2903	0.7233	0.0065	0.004	0.5231	0.8417	217.544	211.235	200.764	26.0833	28.3423	28.577	-0.4623	-0.3209	-0.2212	2.2265	2.1503	2.0328	Kirmizi_Pistachio
76459	2274.37	478.625	245.221	0.8588	312.011	0.8374	91303	0.6764	1.9518	0.1857	0.6519	0.0063	0.0032	0.425	0.8294	225.678	215.521	191.485	25.1355	25.5348	27.8681	-0.655	-0.3642	-0.0627	2.5489	2.4065	2.2608	Kirmizi_Pistachio
72671	1183.06	445.461	212.204	0.8792	304.183	0.9734	74660	0.7243	2.0992	0.6525	0.6829	0.0061	0.0029	0.4663	0.9788	220.755	205.828	193.422	25.2188	25.8672	23.878	-0.7248	-0.5892	-0.5767	2.6822	2.5217	2.5869	Kirmizi_Pistachio
84143	1170.39	474.28	227.722	0.8772	327.314	0.9864	85307	0.7556	2.0827	0.7719	0.6901	0.0056	0.0027	0.4763	0.9919	226.589	220.558	205.965	22.9112	24.6619	24.8875	-0.9349	-0.7006	-0.4097	3.3906	2.8394	2.564	Kirmizi_Pistachio
79055	1241.91	440.753	231.84	0.8505	317.263	0.958	82517	0.7455	1.9011	0.6441	0.7198	0.0056	0.0029	0.5181	0.985	212.388	202.381	188.452	24.2982	25.3874	25.4679	-0.3043	-0.2507	-0.1777	2.0408	2.0225	2.2822	Kirmizi_Pistachio
72322	1796.31	441.514	221.905	0.8645	303.452	0.914	79127	0.7592	1.9897	0.2817	0.6873	0.0061	0.0031	0.4724	0.9399	226.751	222.651	211.59	26.2111	27.9267	28.2381	-0.6952	-0.611	-0.5009	2.4786	2.3427	2.2041	Kirmizi_Pistachio
54954	1991.17	377.706	268.557	0.7032	264.518	0.7181	76523	0.5836	1.4064	0.1742	0.7003	0.0069	0.0049	0.4905	0.6898	207.884	198.977	178.585	19.6093	20.5269	20.1938	-0.501	-0.38	0.106	2.731	2.6726	3.3208	Kirmizi_Pistachio
71171	1450.94	449.775	209.014	0.8855	301.028	0.9437	75420	0.6459	2.1519	0.4248	0.6693	0.0063	0.0029	0.4479	0.9639	208.682	194.529	181.268	20.6143	21.6383	24.267	-0.2508	0.155	0.6574	3.106	3.6072	3.9909	Kirmizi_Pistachio
76223	1286.83	467.178	211.079	0.8921	311.529	0.9651	78978	0.757	2.2133	0.5784	0.6668	0.0061	0.0028	0.4447	0.9842	220.859	222.24	192.147	20.7486	22.818	24.2058	-1.3772	-1.2366	-0.9894	4.4145	3.9075	4.7037	Kirmizi_Pistachio
77693	1260.97	484.827	208.311	0.903	314.518	0.9639	80602	0.7724	2.3274	0.614	0.6487	0.0062	0.0027	0.4208	0.9795	220.59	205.645	181.55	21.1447	21.6569	23.1092	-0.7161	-0.5711	-0.4708	2.8446	2.7162	2.9622	Kirmizi_Pistachio
82880	2466.24	484.175	243.805	0.864	324.848	0.8636	95975	0.6751	1.9859	0.1712	0.6709	0.0058	0.0029	0.4501	0.894	222.523	212.932	192.052	24.7258	26.2776	26.7678	-0.6413	-0.6164	-0.5481	2.4161	2.3967	2.4619	Kirmizi_Pistachio
77194	1191.43	455.549	222.785	0.8723	313.507	0.9481	81423	0.7162	2.0448	0.6834	0.6882	0.0059	0.0029	0.4736	0.9684	219.017	213.488	195.196	26.5054	27.4709	24.8038	-0.5709	-0.5312	-0.556	2.3861	2.4101	2.6244	Kirmizi_Pistachio
93185	1255.07	453.685	267.512	0.8077	344.452	0.9714	95931	0.7091	1.6959	0.7434	0.7592	0.0049	0.0029	0.5764	0.9776	227.808	219.728	207.098	27.2319	28.7519	31.7848	-1.015	-0.8943	-0.9362	2.9092	2.6316	2.7633	Kirmizi_Pistachio
69025	1993.15	442.184	207.924	0.8825	296.455	0.9211	74936	0.7501	2.1267	0.2183	0.6704	0.0064	0.003	0.4495	0.9559	210.258	199.217	184.648	17.6252	20.1982	26.1023	-0.4117	-0.1647	-0.2393	3.6353	3.4437	4.8084	Kirmizi_Pistachio
44791	993.476	378.331	156.217	0.9108	238.809	0.9451	47391	0.7422	2.4218	0.5703	0.6312	0.0084	0.0035	0.3984	0.9649	199.922	188.028	196.53	20.2655	20.9443	20.0923	-0.1437	0.0738	-0.0633	2.5285	2.5453	2.4463	Kirmizi_Pistachio
76974	1248	465.767	215.454	0.8866	313.06	0.953	80767	0.7571	2.1618	0.6211	0.6721	0.0061	0.0028	0.4518	0.9766	225.73	221.241	215.251	29.3922	31.3949	30.3203	-0.6424	-0.5508	-0.5261	2.1572	2.0227	2.0952	Kirmizi_Pistachio
57664	1242.04	395.902	191.182	0.8757	270.961	0.9284	62109	0.7336	2.0708	0.4697	0.6844	0.0069	0.0033	0.4684	0.97	227.43	216.821	206.485	27.0987	29.5402	30.2577	-0.7409	-0.6401	-0.6929	2.3888	2.3037	2.3459	Kirmizi_Pistachio
58332	1222.44	398.298	191.347	0.877	272.526	0.9321	62579	0.7149	2.0815	0.4905	0.6842	0.0068	0.0033	0.4682	0.9745	209.949	200.047	186.56	21.3794	22.4729	21.9041	-0.7686	-0.7205	-0.3627	2.6047	2.5017	2.3104	Kirmizi_Pistachio
83044	1212.62	492.751	231.323	0.883	325.169	0.9153	90730	0.7195	2.1301	0.7097	0.6599	0.0059	0.0028	0.4355	0.9276	217.373	207.419	189.973	20.5185	21.807	24.5568	-0.4732	-0.2314	0.2961	3.078	2.7966	2.8177	Kirmizi_Pistachio
81796	1212.73	470.053	228.821	0.8735	322.716	0.9471	86362	0.7502	2.0542	0.6989	0.6866	0.0057	0.0028	0.4714	0.9683	215.881	206.44	191.99	23.0256	23.8601	23.4183	-0.6871	-0.668	-0.6969	2.6767	2.582	2.5781	Kirmizi_Pistachio
72682	1228.45	483.313	194.632	0.9153	304.207	0.9681	75075	0.7105	2.4832	0.6052	0.6294	0.0066	0.0027	0.3962	0.9838	194.917	184.776	178.586	14.9318	15.127	16.0761	-0.3506	-0.1983	0.0439	3.4227	3.4293	4.7344	Kirmizi_Pistachio
69962	1340.62	456.959	200.866	0.8982	298.46	0.944	74109	0.7292	2.2749	0.4892	0.6531	0.0065	0.0029	0.4266	0.9705	213.839	200.935	183.249	24.289	24.9698	24.5734	-0.4296	-0.395	-0.2914	2.1954	2.1266	2.1546	Kirmizi_Pistachio
74025	1860.14	448.168	220.98	0.87	307.004	0.9284	79734	0.752	2.0281	0.2688	0.685	0.0061	0.003	0.4693	0.9517	204.745	197.068	180.208	22.7249	23.7309	22.8802	-0.1673	-0.0583	0.1036	2.2059	2.2375	2.5815	Kirmizi_Pistachio
79004	1965.68	470.608	234.689	0.8668	317.161	0.8662	91210	0.6818	2.0052	0.2569	0.6739	0.006	0.003	0.4542	0.9108	211.803	199.598	181.731	23.0472	23.912	23.8238	-0.4574	-0.3947	-0.248	2.283	2.2989	2.4564	Kirmizi_Pistachio
67935	1112.06	435.431	203.256	0.8844	294.105	0.9669	70257	0.7099	2.1423	0.6903	0.6754	0.0064	0.003	0.4562	0.9773	206.2	194.296	183.47	20.3576	21.2721	22.502	-0.6028	-0.462	-0.4225	2.3736	2.2922	2.4928	Kirmizi_Pistachio
77550	1187.76	480.54	218.541	0.8906	314.229	0.9099	85226	0.7398	2.1989	0.6908	0.6539	0.0062	0.0028	0.4276	0.9402	227.318	215.378	184.5	23.0724	23.8182	25.7555	-0.8951	-0.7791	-0.5679	3.3152	3.1633	3.7458	Kirmizi_Pistachio
66797	1077.91	431.711	207.916	0.8764	291.631	0.9384	71179	0.7346	2.0764	0.7224	0.6755	0.0065	0.0031	0.4563	0.9475	227.589	220.42	208.8	24.8917	25.4602	24.9782	-1.067	-0.8166	-0.807	3.4094	3.0146	3.079	Kirmizi_Pistachio
40680	1226.05	347.55	164.053	0.8816	227.586	0.8485	47945	0.5347	2.1185	0.3401	0.6548	0.0085	0.004	0.4288	0.9084	179.67	168.837	159.409	12.7863	13.2459	18.6525	-0.0038	0.1525	0.8894	2.2706	2.2578	4.5865	Kirmizi_Pistachio
75774	1257.57	424.663	234.702	0.8334	310.61	0.9369	80874	0.7264	1.8094	0.6021	0.7314	0.0056	0.0031	0.535	0.968	204.453	195.312	179.988	19.1619	20.3041	19.9655	-0.4746	-0.4751	-0.6011	2.516	2.5144	2.9848	Kirmizi_Pistachio
64152	1840.57	384.844	270.252	0.7119	285.799	0.7992	80269	0.6221	1.424	0.238	0.7426	0.006	0.0042	0.5515	0.7854	205.069	190.417	178.051	19.4002	19.5428	17.0059	-0.5568	-0.4909	0.0791	2.6032	2.7327	3.7684	Kirmizi_Pistachio
65548	2125.07	467.451	217.062	0.8857	288.892	0.7654	85635	0.5232	2.1535	0.1824	0.618	0.0071	0.0033	0.3819	0.8225	188.947	174.714	149.433	12.8507	14.8128	17.9716	-0.1743	-0.0284	0.0945	3.0301	3.0166	3.3335	Kirmizi_Pistachio
73496	1118.4	414.906	227.9	0.8356	305.905	0.9738	75474	0.7397	1.8206	0.7384	0.7373	0.0056	0.0031	0.5436	0.9896	205.289	195.462	186.622	21.6237	22.949	21.5302	-0.6926	-0.6324	-0.4304	2.4142	2.2298	2.5626	Kirmizi_Pistachio
72772	1304.82	485.622	197.222	0.9138	304.395	0.9253	78643	0.725	2.4623	0.5371	0.6268	0.0067	0.0027	0.3929	0.9674	196.45	184.527	169.882	17.6397	18.8131	18.3013	0.0647	0.0384	0.0144	2.5533	2.4574	2.8331	Kirmizi_Pistachio
85382	1297.92	457.709	255.045	0.8304	329.715	0.9054	94302	0.6732	1.7946	0.6369	0.7204	0.0054	0.003	0.5189	0.9313	222.345	213.046	199.078	23.8551	24.8736	22.0896	-1.0418	-1.0391	-0.7514	3.3692	3.3564	2.8507	Kirmizi_Pistachio
83358	1243.56	486.529	221.596	0.8903	325.783	0.9819	84896	0.749	2.1956	0.6774	0.6696	0.0058	0.0027	0.4484	0.9844	207.212	195.361	177.428	15.2627	14.9732	16.1049	-1.1158	-0.8806	0.4734	4.7166	4.713	6.0643	Kirmizi_Pistachio
68539	2113.31	473.738	245.446	0.8553	295.409	0.7609	90076	0.6333	1.9301	0.1929	0.6236	0.0069	0.0036	0.3888	0.7505	212.87	202.445	190.697	21.9695	22.5997	21.7847	-0.8258	-0.7606	-0.7091	2.947	2.9053	3.0724	Kirmizi_Pistachio
60580	1004.68	404.823	196.416	0.8744	277.728	0.9582	63221	0.7785	2.0611	0.7542	0.686	0.0067	0.0032	0.4707	0.9701	231.236	223.289	200.141	25.4404	28.1703	27.9103	-1.0133	-0.7844	-0.7371	3.1419	2.7308	2.6566	Kirmizi_Pistachio
74655	1102.14	444.171	217.113	0.8724	308.308	0.9712	76871	0.7712	2.0458	0.7723	0.6941	0.0059	0.0029	0.4818	0.9857	225.247	215.417	196.001	23.8466	24.1201	23.9333	-0.8011	-0.7452	-0.69	3.0027	2.889	2.7364	Kirmizi_Pistachio
94673	1211.19	493.037	247.029	0.8654	347.191	0.9936	95279	0.7474	1.9959	0.811	0.7042	0.0052	0.0026	0.4959	0.9897	241.093	235.03	202.68	20.6518	22.952	21.618	-1.7926	-1.2996	-0.7756	5.8003	4.219	2.8344	Kirmizi_Pistachio
77556	1129.85	416.906	242.153	0.814	314.241	0.9844	78784	0.7476	1.7217	0.7635	0.7537	0.0054	0.0031	0.5681	0.9781	222.512	210.57	195.867	20.7222	20.7896	21.3137	-1.1232	-1.0661	-0.7566	3.8919	3.7436	3.4022	Kirmizi_Pistachio
36760	1730.06	439.656	155.541	0.9353	216.343	0.6583	55843	0.4485	2.8266	0.1543	0.4921	0.012	0.0042	0.2421	0.6844	174.914	166.391	180.57	20.1616	19.0635	20.1575	0.7815	1.0808	1.183	3.2387	4.1588	4.5453	Kirmizi_Pistachio
66410	1953.48	427.18	217.286	0.861	290.785	0.8926	74401	0.6611	1.966	0.2187	0.6807	0.0064	0.0033	0.4634	0.911	191.329	181.546	167.374	17.5959	18.3663	18.6615	-0.2981	-0.2193	-0.2546	2.0888	2.1051	2.5318	Kirmizi_Pistachio
79408	2382.73	467.52	258.867	0.8327	317.971	0.8612	92208	0.6831	1.806	0.1758	0.6801	0.0059	0.0033	0.4626	0.8354	222.347	213.215	197.659	25.0827	27.0228	22.9089	-0.78	-0.8235	-0.5605	2.8049	2.8744	2.3246	Kirmizi_Pistachio
81975	1666.8	452.42	237.934	0.8505	323.069	0.9274	88388	0.7124	1.9014	0.3708	0.7141	0.0055	0.0029	0.5099	0.9696	206.02	194.155	178.682	18.7346	20.0109	21.9187	-0.8284	-0.7104	-0.3474	3.1947	3.0559	3.2552	Kirmizi_Pistachio
69388	1078.69	427.573	208.68	0.8728	297.233	0.9812	70719	0.7794	2.0489	0.7494	0.6952	0.0062	0.003	0.4833	0.9902	227.502	219.636	200.954	26.6131	27.9466	28.2954	-0.9952	-0.8097	-0.5709	3.1251	2.8308	2.4167	Kirmizi_Pistachio
93818	1233.89	478.681	251.675	0.8506	345.619	0.9848	95264	0.7732	1.902	0.7744	0.722	0.0051	0.0027	0.5213	0.9915	213.787	203.555	192.34	20.4323	21.8676	24.2354	-0.7094	-0.5916	-0.1848	2.9904	2.7994	2.6906	Kirmizi_Pistachio
81369	1269.58	456.76	232.718	0.8605	321.873	0.9453	86074	0.7151	1.9627	0.6344	0.7047	0.0056	0.0029	0.4966	0.9747	224.431	218.288	213.232	26.9392	28.4536	27.9277	-0.8216	-0.7968	-0.6408	2.7451	2.7497	2.4612	Kirmizi_Pistachio
75629	1206.3	460.167	213.462	0.8859	310.312	0.9789	77259	0.7363	2.1557	0.6531	0.6743	0.0061	0.0028	0.4547	0.9803	206.611	196.502	180.603	17.0684	17.7995	19.3563	-0.4874	-0.1989	0.5671	3.609	3.6254	4.5989	Kirmizi_Pistachio
71332	1140.75	428.309	217.424	0.8616	301.368	0.9542	74754	0.7439	1.9699	0.6888	0.7036	0.006	0.003	0.4951	0.9753	207.595	201.266	183.414	21.0211	23.1702	23.6728	-0.6131	-0.4365	-0.211	2.5464	2.2938	2.097	Kirmizi_Pistachio
72609	1379.62	436.42	223.152	0.8594	304.054	0.8986	80804	0.7094	1.9557	0.4794	0.6967	0.006	0.0031	0.4854	0.9493	208.286	199.415	194.455	21.594	23.4487	26.4976	-0.5491	-0.4125	-0.1933	2.6733	2.6036	2.3894	Kirmizi_Pistachio
77051	1327	436.247	231.958	0.8469	313.216	0.9448	81553	0.7105	1.8807	0.5499	0.718	0.0057	0.003	0.5155	0.9695	222.426	214.403	193.663	25.2191	24.1154	42.1237	-0.8516	-0.6995	-1.6037	2.8775	2.9643	5.502	Kirmizi_Pistachio
84809	1104.28	426.584	254.876	0.8019	328.606	0.9841	86181	0.7634	1.6737	0.874	0.7703	0.005	0.003	0.5934	0.9932	217.042	206.363	191.187	23.9025	25.8862	27.3705	-0.4607	-0.3914	-0.2971	2.2604	2.1523	2.2373	Kirmizi_Pistachio
77926	1299.98	440.828	233.162	0.8487	314.99	0.9523	81829	0.7302	1.8907	0.5795	0.7145	0.0057	0.003	0.5106	0.9653	203.833	199.167	191.92	19.6597	21.5991	24.4906	-0.6892	-0.5673	-0.4049	3.3423	3.0669	2.9502	Kirmizi_Pistachio
76916	1865.75	450.511	232.715	0.8563	312.942	0.9064	84858	0.7218	1.9359	0.2777	0.6946	0.0059	0.003	0.4825	0.9341	212.255	208.266	191.91	28.3058	31.5148	30.7444	-0.3801	-0.3282	-0.3447	1.8672	1.8125	1.895	Kirmizi_Pistachio
74224	1190.89	459.773	209.452	0.8902	307.416	0.973	76286	0.6639	2.1951	0.6577	0.6686	0.0062	0.0028	0.4471	0.9814	220.897	207.92	185.216	21.1658	22.0677	23.7342	-1.0028	-0.8919	-0.7083	3.5042	3.234	2.944	Kirmizi_Pistachio
87181	2045.62	486.653	243.86	0.8654	333.17	0.9238	94368	0.7312	1.9956	0.2618	0.6846	0.0056	0.0028	0.4687	0.9353	221.281	214.977	189.856	22.4936	24.4637	25.7528	-0.9235	-0.7998	0.0073	3.4402	3.2189	2.8302	Kirmizi_Pistachio
76100	1998.61	462.776	218.115	0.882	311.277	0.9089	83725	0.7288	2.1217	0.2394	0.6726	0.0061	0.0029	0.4524	0.9599	199.703	189.235	177.821	18.5609	18.7723	20.1542	-0.1909	0.0963	0.7862	3.4195	3.9813	5.7988	Kirmizi_Pistachio
73327	1093.55	432.596	219.046	0.8623	305.553	0.9716	75469	0.6005	1.9749	0.7705	0.7063	0.0059	0.003	0.4989	0.9853	222.529	219.397	206.679	20.5946	22.1952	23.3088	-1.3062	-1.1522	-0.8398	4.5737	4.0528	3.1794	Kirmizi_Pistachio
76340	1120.77	457.797	216.983	0.8805	311.768	0.9885	77231	0.6392	2.1098	0.7637	0.681	0.006	0.0028	0.4638	0.9785	235.82	232.161	212.24	19.8434	19.585	18.5863	-1.6161	-1.406	-0.8575	5.9701	5.4021	3.5017	Kirmizi_Pistachio
84224	1200.88	467.186	235.682	0.8634	327.471	0.9668	87114	0.7333	1.9823	0.7339	0.7009	0.0055	0.0028	0.4913	0.9739	235.492	233.666	221.661	25.7835	27.3522	28.662	-1.3736	-1.3	-0.8963	4.1513	3.9263	2.8939	Kirmizi_Pistachio
83885	2254.85	508.134	223.076	0.8985	326.811	0.9012	93077	0.6999	2.2779	0.2073	0.6432	0.0061	0.0027	0.4137	0.9422	209.177	203.689	191.438	23.4736	24.9595	25.5861	-0.5871	-0.5414	-0.5155	2.2854	2.2516	2.7157	Kirmizi_Pistachio
76223	1174.62	455.076	214.8	0.8816	311.529	0.9765	78055	0.7181	2.1186	0.6942	0.6846	0.006	0.0028	0.4686	0.9928	207.741	197.409	186.671	19.6721	20.9266	21.7984	-0.3735	-0.133	0.1312	3.0482	2.9158	3.2081	Kirmizi_Pistachio
85328	1146.35	458.376	239.811	0.8522	329.61	0.9913	86075	0.7833	1.9114	0.816	0.7191	0.0054	0.0028	0.5171	0.9884	233.347	230.205	214.134	24.6152	25.4429	24.3119	-1.3821	-1.2314	-1.0853	4.105	3.6922	3.1658	Kirmizi_Pistachio
77973	1393.83	468.321	219.714	0.8831	315.085	0.9394	83007	0.6425	2.1315	0.5044	0.6728	0.006	0.0028	0.4527	0.9648	216.243	204.508	186.089	21.707	22.8708	25.5444	-0.6927	-0.4075	0.2069	3.2152	3.3007	3.8142	Kirmizi_Pistachio
55185	1044.98	395.213	179.457	0.891	265.073	0.9702	56880	0.5562	2.2023	0.6351	0.6707	0.0072	0.0033	0.4499	0.9907	209.334	199.704	181.303	19.297	21.1369	23.8861	-0.925	-0.8684	-0.7782	2.8716	2.7701	2.7185	Kirmizi_Pistachio
78903	1232.81	474.703	216.747	0.8897	316.958	0.9542	82690	0.7154	2.1901	0.6524	0.6677	0.006	0.0027	0.4458	0.9764	202.671	189.342	172.047	16.6497	19.6134	25.6789	0.1412	0.1986	0.0795	3.843	3.5829	4.2834	Kirmizi_Pistachio
78636	1184.7	462.856	220.786	0.8789	316.421	0.9727	80845	0.7243	2.0964	0.7041	0.6836	0.0059	0.0028	0.4673	0.9797	219.774	211.245	196.003	23.5398	24.2952	21.0717	-1.0486	-1.0036	-0.9818	3.1955	3.1012	3.1393	Kirmizi_Pistachio
79014	1836.95	456.142	239.604	0.8509	317.181	0.9086	86958	0.7231	1.9037	0.2943	0.6954	0.0058	0.003	0.4835	0.9205	219.887	211.845	188.833	23.1201	23.7265	21.9328	-0.9458	-0.8497	-0.5913	3.1678	3.0379	2.8226	Kirmizi_Pistachio
75984	1191.65	456.043	217.156	0.8794	311.04	0.969	78412	0.6757	2.1001	0.6724	0.682	0.006	0.0029	0.4652	0.9769	205.148	193.717	178.805	15.1909	15.9382	17.1601	-0.5612	-0.3016	0.8285	4.3054	4.4298	5.9481	Kirmizi_Pistachio
74070	2140.66	460.599	214.759	0.8846	307.098	0.9205	80470	0.7574	2.1447	0.2031	0.6667	0.0062	0.0029	0.4445	0.9534	218.015	202.83	181.03	26.7522	26.3779	25.3644	-0.46	-0.4665	-0.6121	2.0674	2.1592	2.51	Kirmizi_Pistachio
52802	1096.41	405.782	193.435	0.8791	259.287	0.8312	63527	0.6283	2.0978	0.552	0.639	0.0077	0.0037	0.4083	0.8565	193.49	180.433	169.931	18.2945	18.7736	16.8256	-0.271	-0.2387	-0.2212	2.1071	2.1011	2.785	Kirmizi_Pistachio
76747	1501.3	465.939	217.775	0.8841	312.598	0.9122	84131	0.6531	2.1395	0.4279	0.6709	0.0061	0.0028	0.4501	0.963	201.398	190.605	177.884	21.2114	23.0266	27.1272	0.0209	0.2463	0.8093	3.1569	3.3068	3.7185	Kirmizi_Pistachio
81090	1225.73	463.695	226.288	0.8728	321.321	0.9629	84214	0.6596	2.0491	0.6782	0.693	0.0057	0.0028	0.4802	0.984	202.037	190.133	170.351	16.2459	16.0772	16.804	-0.7717	-0.5561	0.3283	3.4861	3.9248	5.8498	Kirmizi_Pistachio
58954	1877.18	405.892	215.959	0.8467	273.976	0.8516	69229	0.67	1.8795	0.2102	0.675	0.0069	0.0037	0.4556	0.8563	194.213	180.713	172.748	15.8999	16.5307	19.2347	-0.261	0.0824	-0.0657	2.9672	3.1875	2.9059	Kirmizi_Pistachio
79306	1251.84	494.355	206.916	0.9082	317.767	0.9669	82019	0.7228	2.3892	0.6359	0.6428	0.0062	0.0026	0.4132	0.9872	215.4	207.13	195.202	22.4513	23.0256	20.9084	-0.7971	-0.7759	-0.7434	2.7978	2.7056	2.7019	Kirmizi_Pistachio
71743	1100.94	441.344	219.439	0.8676	302.235	0.9229	77735	0.7228	2.0112	0.7438	0.6848	0.0062	0.0031	0.469	0.9432	219.568	215.556	197.521	23.006	26.4705	19.9005	-1.0406	-1.0676	-0.8789	3.2483	3.121	2.8128	Kirmizi_Pistachio
83956	1248.04	457.165	234.857	0.858	326.95	0.9697	86578	0.7381	1.9466	0.6773	0.7152	0.0054	0.0028	0.5115	0.9956	202.962	197.146	187.339	18.7486	19.3407	19.548	-0.7183	-0.623	-0.4899	2.8276	2.687	2.8717	Kirmizi_Pistachio
59629	1043.87	412.23	186.125	0.8923	275.539	0.9782	60959	0.658	2.2148	0.6877	0.6684	0.0069	0.0031	0.4468	0.9895	193.506	184.104	172.373	14.6958	16.0054	19.3856	-0.3608	-0.2376	-0.342	3.343	3.2339	3.2987	Kirmizi_Pistachio
77197	1093.17	434.675	230.962	0.8472	313.513	0.9711	79493	0.752	1.882	0.8118	0.7213	0.0056	0.003	0.5202	0.9791	211.507	201.887	180.213	20.2228	20.1847	16.6234	-0.5332	-0.5333	-0.3704	2.7039	2.7385	2.6654	Kirmizi_Pistachio
76258	2243.62	465.123	253.635	0.8382	311.6	0.7976	95609	0.6227	1.8338	0.1904	0.6699	0.0061	0.0033	0.4488	0.823	203.336	189.682	168.21	20.4412	21.9509	22.0148	-0.3522	-0.3436	-0.1987	1.9983	1.9567	1.8438	Kirmizi_Pistachio
89267	1242.2	485.197	238.491	0.8709	337.132	0.9758	91482	0.6987	2.0344	0.727	0.6948	0.0054	0.0027	0.4828	0.9822	203.774	195.477	182.048	16.0875	16.9242	17.9987	-1.0037	-0.9056	-0.2683	3.842	3.5969	3.6071	Kirmizi_Pistachio
50804	1369.51	410.507	161.111	0.9198	254.334	0.9281	54737	0.6813	2.548	0.3404	0.6196	0.0081	0.0032	0.3839	0.9781	181.184	167.693	162.551	10.6111	11.9956	14.2777	-0.0484	0.0912	0.6459	3.4663	3.3002	4.6133	Kirmizi_Pistachio
57938	1129.99	421.497	181.743	0.9023	271.604	0.9492	61036	0.6556	2.3192	0.5702	0.6444	0.0073	0.0031	0.4152	0.963	195.736	183.501	168.303	16.285	16.6453	16.1527	-0.3617	-0.3276	-0.2347	2.6196	2.6397	2.5484	Kirmizi_Pistachio
75142	1989.82	476.783	224.839	0.8818	309.312	0.8789	85497	0.6846	2.1206	0.2385	0.6487	0.0063	0.003	0.4209	0.8925	207.646	198.971	189.041	22.7642	23.6862	23.1484	-0.3827	-0.3207	-0.3042	2.3301	2.2731	2.4211	Kirmizi_Pistachio
68562	1383.17	422.437	217.929	0.8567	295.459	0.9218	74380	0.7149	1.9384	0.4503	0.6994	0.0062	0.0032	0.4892	0.9482	199.802	190.056	178.686	19.8132	22.1805	19.8849	-0.5274	-0.4999	-0.6563	2.26	2.2482	2.6464	Kirmizi_Pistachio
61544	1242.57	423.383	196.88	0.8853	279.929	0.9323	66012	0.715	2.1505	0.5009	0.6612	0.0069	0.0032	0.4371	0.9401	196.919	185.505	175.789	18.8656	20.471	21.6058	-0.3664	-0.4306	-0.7229	2.1168	2.2362	2.8001	Kirmizi_Pistachio
81245	1430.69	472.579	227.584	0.8764	321.628	0.9415	86295	0.7217	2.0765	0.4988	0.6806	0.0058	0.0028	0.4632	0.9618	211.45	200.6	188.736	19.9729	21.3838	24.8807	-0.6244	-0.3226	0.2064	3.4736	3.364	3.4129	Kirmizi_Pistachio
78705	1401.47	435.959	232.917	0.8453	316.56	0.9624	81780	0.7107	1.8717	0.5036	0.7261	0.0055	0.003	0.5273	0.9869	213.923	199.986	186.61	20.6906	23.3485	26.0646	-0.2394	0.0662	0.4993	2.8062	2.8527	3.2749	Kirmizi_Pistachio
66411	1196.14	450.114	204.833	0.8905	290.787	0.8815	75340	0.7346	2.1975	0.5833	0.646	0.0068	0.0031	0.4174	0.9171	218.96	204.24	178.229	22.793	24.6823	29.4488	-0.7525	-0.5009	-0.1832	2.7346	2.7096	2.7805	Kirmizi_Pistachio
66773	1309.47	435.341	201.589	0.8863	291.579	0.9528	70083	0.7276	2.1595	0.4894	0.6698	0.0065	0.003	0.4486	0.9688	206.4	188.581	184.953	20.4514	21.813	24.2686	-0.2014	0.2867	-0.2795	2.7957	2.8393	2.7603	Kirmizi_Pistachio
69615	1467.99	467.148	194.669	0.909	297.719	0.9309	74783	0.7005	2.3997	0.4059	0.6373	0.0067	0.0028	0.4062	0.9747	208.179	196.074	175.328	19.7547	21.9478	24.78	-0.4158	-0.1942	-0.2475	2.9091	2.8002	2.9035	Kirmizi_Pistachio
58990	953.709	368.631	208.978	0.8238	274.059	0.9761	60432	0.7687	1.764	0.815	0.7435	0.0062	0.0035	0.5527	0.975	219.411	209.742	199.685	26.0224	25.9551	20.251	-0.7589	-0.6609	-0.2659	2.5556	2.4754	2.521	Kirmizi_Pistachio
85227	1278.99	482.078	229.72	0.8792	329.415	0.9752	87396	0.7751	2.0986	0.6547	0.6833	0.0057	0.0027	0.4669	0.9799	230.173	221.505	204.038	26.033	27.6536	28.9036	-1.0671	-0.8998	-0.7472	3.2117	2.9709	2.7458	Kirmizi_Pistachio
72479	1133.73	447.966	220.638	0.8703	303.781	0.9091	79728	0.6822	2.0303	0.7086	0.6781	0.0062	0.003	0.4599	0.9337	222.076	217.094	199.896	25.4823	26.8577	27.75	-0.6603	-0.5535	-0.3567	2.5033	2.34	2.2975	Kirmizi_Pistachio
77973	1240.17	486.917	208.266	0.9039	315.085	0.9554	81611	0.7631	2.338	0.6371	0.6471	0.0062	0.0027	0.4187	0.979	226.731	218.945	197.57	25.3165	27.0128	27.5175	-0.8423	-0.7096	-0.645	2.852	2.7	2.7144	Kirmizi_Pistachio
62618	2125.25	401.27	248.352	0.7855	282.361	0.8125	77070	0.6333	1.6157	0.1742	0.7037	0.0064	0.004	0.4951	0.8	212.17	201.015	195.78	23.5492	24.8272	24.9777	-0.4506	-0.386	-0.1361	2.3601	2.4305	2.5592	Kirmizi_Pistachio
76405	1455.27	431.148	232.273	0.8425	311.9	0.9585	79710	0.7667	1.8562	0.4534	0.7234	0.0056	0.003	0.5233	0.9714	223.432	220.027	206.848	26.4469	28.8245	31.0195	-0.7009	-0.6222	-0.5397	2.3882	2.2248	2.2581	Kirmizi_Pistachio
61300	1054.95	429.856	190.255	0.8967	279.374	0.9403	65195	0.7001	2.2594	0.6922	0.6499	0.007	0.0031	0.4224	0.9544	219.019	210.605	192.032	23.4128	24.2801	23.2553	-0.8976	-0.7907	-0.6333	2.8408	2.6272	2.4	Kirmizi_Pistachio
71061	1052.92	419.113	217.3	0.8551	300.795	0.9906	71738	0.7459	1.9287	0.8055	0.7177	0.0059	0.0031	0.5151	0.9935	210.882	200.045	184.037	17.3455	17.851	17.3684	-0.2636	-0.0999	0.0286	3.2288	2.6527	2.6293	Kirmizi_Pistachio
80981	1221.67	474.395	220.018	0.8859	321.105	0.9798	82648	0.7526	2.1562	0.6818	0.6769	0.0059	0.0027	0.4582	0.9879	232.647	220.519	192.679	21.8966	22.006	24.5451	-1.1928	-0.973	-0.4737	3.8468	3.6293	3.6862	Kirmizi_Pistachio
79793	2403.01	457.613	264.978	0.8153	318.741	0.8555	93276	0.6686	1.727	0.1736	0.6965	0.0057	0.0033	0.4852	0.8379	226.724	216.689	201.725	27.0319	29.5976	27.3162	-0.6832	-0.4511	-0.3992	2.4404	2.2755	2.1764	Kirmizi_Pistachio
56095	1532.03	448.199	169.029	0.9262	267.25	0.8868	63255	0.6703	2.6516	0.3003	0.5963	0.008	0.003	0.3555	0.9428	192.791	185.33	173.044	15.2598	15.8475	20.3367	-0.5183	-0.3393	0.0975	3.0511	2.8222	4.0212	Kirmizi_Pistachio
61137	1517.49	392.101	212.675	0.8401	279.002	0.9021	67771	0.692	1.8437	0.3336	0.7116	0.0064	0.0035	0.5063	0.9335	213.558	206.026	192.271	26.4423	28.3054	27.9979	-0.3889	-0.301	-0.238	2.0647	2.031	2.0592	Kirmizi_Pistachio
41578	1534.57	363.19	152.46	0.9076	230.084	0.8914	46646	0.6713	2.3822	0.2219	0.6335	0.0087	0.0037	0.4013	0.9561	182.88	175.595	164.195	13.9497	14.8217	15.8042	0.1138	0.1248	-0.0129	2.7858	2.8424	2.7719	Kirmizi_Pistachio
81904	2216.84	433.695	259.017	0.8021	322.929	0.8921	91809	0.7281	1.6744	0.2094	0.7446	0.0053	0.0032	0.5544	0.9283	219.327	211.205	194.173	23.0439	24.3966	23.7915	-1.0179	-0.8168	-0.289	3.2477	2.9062	2.6648	Kirmizi_Pistachio
72208	1841.91	422.932	240.07	0.8233	303.213	0.8816	81907	0.7137	1.7617	0.2675	0.7169	0.0059	0.0033	0.514	0.9055	205.244	201.056	186.77	23.5158	26.4436	28.7694	-0.0791	0.0119	0.2515	2.16	2.0763	2.3536	Kirmizi_Pistachio
91974	1873.72	506.376	244.972	0.8752	342.206	0.9443	97404	0.7437	2.0671	0.3292	0.6758	0.0055	0.0027	0.4567	0.944	237.07	230.173	215.02	21.6228	24.2669	25.2946	-1.4671	-1.078	-0.4692	4.9104	3.8429	2.6736	Kirmizi_Pistachio
72229	1538.71	436.279	243.396	0.8299	303.257	0.8692	83102	0.6549	1.7925	0.3834	0.6951	0.006	0.0034	0.4832	0.8661	210.386	199.276	187.631	25.3258	25.6801	26.7616	-0.1192	-0.1068	-0.0566	2.2469	2.1988	2.2173	Kirmizi_Pistachio
69358	1128.32	440.052	205.782	0.8839	297.169	0.9707	71451	0.7776	2.1384	0.6846	0.6753	0.0063	0.003	0.456	0.9752	236.905	231.646	208.734	24.051	26.943	31.5363	-1.3958	-1.1397	-0.5087	4.0325	3.4198	2.4361	Kirmizi_Pistachio
72181	1997.04	441.428	220.167	0.8667	303.156	0.9042	79828	0.7019	2.005	0.2274	0.6868	0.0061	0.0031	0.4716	0.9456	210.653	201.804	196.809	23.466	25.3376	27.2524	-0.4301	-0.283	-0.2543	2.2042	2.1196	2.1898	Kirmizi_Pistachio
91757	1273.41	503.752	233.023	0.8866	341.802	0.9846	93193	0.7722	2.1618	0.7111	0.6785	0.0055	0.0025	0.4604	0.9953	234.356	229.933	213.808	27.6077	30.0414	29.7468	-1.2932	-1.0829	-0.8693	3.5845	3.0161	2.571	Kirmizi_Pistachio
67556	1198.42	433.477	203.125	0.8834	293.283	0.9583	70499	0.7662	2.134	0.5911	0.6766	0.0064	0.003	0.4578	0.9769	195.955	187.283	170.853	16.274	17.0737	19.3301	-0.1709	0.1196	0.945	3.2084	3.3777	4.4437	Kirmizi_Pistachio
74374	1151.84	438.372	217.924	0.8677	307.727	0.9744	76331	0.7686	2.0116	0.7044	0.702	0.0059	0.0029	0.4928	0.9912	206.857	194.118	177.266	17.1217	17.4801	18.5123	-0.9353	-0.7373	-0.1527	3.8054	3.6341	3.3197	Kirmizi_Pistachio
84344	1193.49	453.179	243.462	0.8434	327.704	0.967	87226	0.7708	1.8614	0.7441	0.7231	0.0054	0.0029	0.5229	0.9733	221.395	206.651	177.232	20.749	21.0926	25.0425	-0.9483	-0.527	0.2975	3.6876	3.2823	3.7221	Kirmizi_Pistachio
79243	1298.79	482.542	219.797	0.8902	317.64	0.9293	85274	0.7533	2.1954	0.5903	0.6583	0.0061	0.0028	0.4333	0.9513	223.762	211.734	184.685	25.6107	27.5064	29.7719	-0.6096	-0.4054	-0.2042	2.4078	2.1813	2.2009	Kirmizi_Pistachio
92846	2465.24	509.905	252.835	0.8684	343.824	0.8908	104229	0.7383	2.0168	0.192	0.6743	0.0055	0.0027	0.4547	0.917	226.011	210.674	183.33	23.9833	25.464	23.6262	-0.9104	-0.7721	-0.586	3.1011	3.0484	3.2657	Kirmizi_Pistachio
72220	1222.4	452.734	215.376	0.8796	303.238	0.9114	79244	0.7327	2.1021	0.6074	0.6698	0.0063	0.003	0.4486	0.943	217.846	206.196	187.691	24.7461	26.3558	23.6978	-0.5788	-0.5588	-0.5252	2.338	2.3909	2.6945	Kirmizi_Pistachio
57825	1675.67	400.874	210.459	0.8511	271.339	0.8426	68629	0.617	1.9048	0.2588	0.6769	0.0069	0.0036	0.4582	0.8727	220.058	210.327	198.463	23.7431	24.0397	23.6581	-0.9282	-0.8483	-0.7647	2.9716	2.8753	2.6139	Kirmizi_Pistachio
61585	1675.26	409.728	210.043	0.8586	280.022	0.9013	68326	0.6071	1.9507	0.2758	0.6834	0.0067	0.0034	0.4671	0.9111	199.87	189.555	179.438	21.6433	21.2463	17.5793	-0.2187	-0.1761	-0.1498	2.0963	2.105	2.1976	Kirmizi_Pistachio
72519	1069.96	419.514	224.94	0.8441	303.865	0.9616	75416	0.7489	1.865	0.796	0.7243	0.0058	0.0031	0.5246	0.9785	210.493	197.679	172.619	20.8555	21.4634	21.9906	-0.1345	-0.1003	0.1112	2.7292	2.8452	2.6307	Kirmizi_Pistachio
76838	1538.65	469.69	218.724	0.885	312.783	0.8845	86875	0.6704	2.1474	0.4079	0.6659	0.0061	0.0028	0.4435	0.9523	205.015	196.143	182.007	22.5503	23.8072	21.819	-0.471	-0.318	-0.426	2.235	2.1428	3.7492	Kirmizi_Pistachio
72019	1157.78	450.267	204.967	0.8904	302.816	0.975	73869	0.753	2.1968	0.6752	0.6725	0.0063	0.0028	0.4523	0.9936	226.476	213.667	182.214	26.7863	27.0986	24.7164	-0.615	-0.5253	-0.5447	2.1965	2.2406	2.2937	Kirmizi_Pistachio
62840	1197.22	379.452	218.3	0.8179	282.861	0.9736	64544	0.7358	1.7382	0.5509	0.7454	0.006	0.0035	0.5557	0.9659	207.345	196.653	179.273	18.5168	19.7919	21.0027	-0.7313	-0.6514	-0.4958	3.0328	2.8524	2.9012	Kirmizi_Pistachio
63160	1126.86	437.806	188.198	0.9029	283.58	0.9759	64721	0.6928	2.3263	0.625	0.6477	0.0069	0.003	0.4196	0.976	214.893	204.963	198.967	23.022	23.0532	23.7598	-1.0165	-0.8084	-0.6875	3.1681	2.9504	2.7848	Kirmizi_Pistachio
73799	2376.09	456.793	219.752	0.8767	306.535	0.9039	81644	0.6816	2.0787	0.1643	0.6711	0.0062	0.003	0.4503	0.9361	191.403	179.744	171.158	16.629	17.6116	18.5951	0.0125	0.2859	0.8871	2.9075	3.1551	4.4888	Kirmizi_Pistachio
63072	1943.85	396.606	225.186	0.8232	283.383	0.8874	71077	0.7047	1.7612	0.2098	0.7145	0.0063	0.0036	0.5105	0.8992	217.658	213.044	206.216	26.1927	28.7578	22.7781	-0.6033	-0.6474	-0.5669	2.3765	2.404	2.3767	Kirmizi_Pistachio
84539	1224.83	489.016	225.364	0.8875	328.083	0.9662	87494	0.7486	2.1699	0.7081	0.6709	0.0058	0.0027	0.4501	0.9767	202.333	191.504	179.545	18.8138	19.5831	21.2859	-0.1908	-0.0297	0.6266	2.5081	2.6893	3.3746	Kirmizi_Pistachio
71330	1228.38	469.022	201.617	0.9029	301.364	0.9431	75632	0.7177	2.3263	0.594	0.6425	0.0066	0.0028	0.4129	0.9604	218.342	198.614	158.302	21.9847	21.7816	20.3206	-0.7675	-0.7041	-0.7891	2.569	2.4549	3.0137	Kirmizi_Pistachio
82522	1144.26	460.34	231.464	0.8644	324.145	0.9773	84435	0.7456	1.9888	0.792	0.7041	0.0056	0.0028	0.4958	0.9861	210.962	202.089	192.04	16.8522	17.102	15.405	-0.628	-0.4942	-0.3601	3.4343	3.3481	3.3894	Kirmizi_Pistachio
70277	1687.69	442.171	215.566	0.8731	299.131	0.8931	78689	0.6998	2.0512	0.3101	0.6765	0.0063	0.0031	0.4577	0.9388	215.92	207.396	209.286	19.7292	19.9713	19.811	-1.253	-1.2279	-0.8855	3.998	3.9915	3.1971	Kirmizi_Pistachio
83517	1281.66	462.55	234.745	0.8617	326.094	0.9644	86597	0.7578	1.9704	0.6389	0.705	0.0055	0.0028	0.497	0.9793	216.927	211.422	194.081	22.1743	23.643	22.7534	-1.0568	-0.8771	-0.6457	3.463	3.008	2.7907	Kirmizi_Pistachio
70915	2004.28	442.638	224.711	0.8616	300.486	0.899	78884	0.7149	1.9698	0.2218	0.6789	0.0062	0.0032	0.4608	0.9078	203.497	198.53	184.389	21.4398	22.8455	21.0069	-0.4259	-0.3457	-0.3332	2.0412	1.9694	2.072	Kirmizi_Pistachio
54461	1657.51	382.473	212.151	0.8321	263.329	0.8491	64138	0.6791	1.8028	0.2491	0.6885	0.007	0.0039	0.474	0.8546	203.31	190.439	173.554	19.8062	21.3032	21.7522	0.0288	0.2289	0.1215	2.513	2.7442	3.2641	Kirmizi_Pistachio
69397	1901.54	420.014	239.686	0.8212	297.252	0.8848	78434	0.6584	1.7524	0.2412	0.7077	0.0061	0.0035	0.5009	0.8777	235.396	230.082	215.442	24.6577	28.066	27.563	-1.1775	-1.0343	-0.6874	3.3965	3.1764	2.3274	Kirmizi_Pistachio
78365	1810.2	474.379	238.52	0.8644	315.876	0.866	90494	0.6927	1.9888	0.3005	0.6659	0.0061	0.003	0.4434	0.8818	223.061	216.466	198.531	23.9895	26.6662	30.342	-0.726	-0.7647	-0.832	2.893	2.9949	3.8539	Kirmizi_Pistachio
75046	2610.33	439.481	270.471	0.7882	309.114	0.8176	91784	0.6621	1.6249	0.1384	0.7034	0.0059	0.0036	0.4947	0.8039	226.29	213.169	185.571	21.756	23.7184	18.3251	-0.8569	-1.0198	-0.4532	3.1485	3.6372	3.6245	Kirmizi_Pistachio
63272	1062.81	405.703	204.448	0.8637	283.832	0.9578	66061	0.687	1.9844	0.7039	0.6996	0.0064	0.0032	0.4894	0.9712	205.582	194.477	190.987	20.5373	23.3759	26.8282	0.2499	0.55	0.5848	3.283	3.3656	3.0987	Kirmizi_Pistachio
60541	2005.33	415.402	267.01	0.7661	277.639	0.6998	86517	0.5697	1.5558	0.1892	0.6684	0.0069	0.0044	0.4467	0.695	210.684	193.621	171.35	22.3012	22.7239	24.9081	-0.0798	-0.0959	-0.1144	2.3062	2.3627	2.7382	Kirmizi_Pistachio
57971	1458.28	372.841	209.833	0.8266	271.682	0.9296	62364	0.6946	1.7768	0.3426	0.7287	0.0064	0.0036	0.531	0.9435	227.984	212.878	186.744	23.8146	22.4516	22.1663	-0.9174	-0.9464	-0.7016	3.0734	3.1532	2.8546	Kirmizi_Pistachio
70727	1292.14	442.051	212.62	0.8767	300.087	0.9414	75132	0.6911	2.0791	0.5323	0.6789	0.0063	0.003	0.4608	0.9581	217.873	209.721	184.085	22.1602	23.7047	29.9347	-0.9569	-0.8099	-0.881	3.0308	2.8593	3.4752	Kirmizi_Pistachio
78536	2738.65	453.438	252.275	0.8309	316.22	0.8772	89533	0.7092	1.7974	0.1316	0.6974	0.0058	0.0032	0.4863	0.8742	226.158	211.397	189.53	25.8387	28.5591	25.0407	-0.6623	-0.3644	-0.3421	2.4653	2.3024	2.3167	Kirmizi_Pistachio
89313	1250.59	459.019	249.699	0.8391	337.219	0.983	90857	0.7693	1.8383	0.7176	0.7347	0.0051	0.0028	0.5397	0.9921	216.856	205.89	188.862	19.3995	19.1462	16.6949	-0.8799	-0.8724	-0.6749	3.7758	3.7657	3.525	Kirmizi_Pistachio
58364	1666.65	377.399	206.436	0.8371	272.601	0.9283	62869	0.7273	1.8282	0.264	0.7223	0.0065	0.0035	0.5217	0.9538	210.049	195.632	188.212	19.41	22.5673	22.2355	-0.485	-0.3715	-0.0267	2.747	2.593	3.1789	Kirmizi_Pistachio
84821	1894.72	491.256	233.824	0.8795	328.63	0.9156	92635	0.6702	2.101	0.2969	0.669	0.0058	0.0028	0.4475	0.9402	225.962	216.486	195.384	23.0663	25.5723	26.5793	-0.8784	-0.6852	-0.5894	3.1324	2.6334	2.3947	Kirmizi_Pistachio
70742	1064.31	444.382	203.517	0.889	300.119	0.9918	71329	0.7677	2.1835	0.7848	0.6754	0.0063	0.0029	0.4561	0.9959	236.395	233.64	216.126	21.6808	22.1918	18.8748	-1.4895	-1.3498	-0.9973	4.6826	4.2172	3.8522	Kirmizi_Pistachio
48509	1020.72	439.973	143.348	0.9454	248.523	0.9792	49537	0.7156	3.0693	0.5851	0.5649	0.0091	0.003	0.3191	0.9793	224.487	218	205.207	19.0464	20.1704	19.9894	-1.1502	-1.0389	-0.7316	3.9978	3.6408	3.147	Kirmizi_Pistachio
76606	1856.07	461.844	226.03	0.8721	312.31	0.9232	82982	0.7273	2.0433	0.2794	0.6762	0.006	0.003	0.4573	0.9344	226.965	221.189	206.834	26.4118	28.4195	26.2038	-0.7792	-0.6666	-0.284	2.6137	2.5329	2.2291	Kirmizi_Pistachio
71991	1429.07	453.819	211.932	0.8843	302.757	0.929	77489	0.6628	2.1413	0.443	0.6671	0.0063	0.0029	0.4451	0.953	218.175	202.226	177.355	21.81	23.2828	27.479	-0.5197	-0.4353	-0.3768	2.4181	2.4371	2.7649	Kirmizi_Pistachio
90302	2037.15	479.203	305.894	0.7698	339.081	0.8279	109071	0.6109	1.5666	0.2734	0.7076	0.0053	0.0034	0.5007	0.7844	225.622	222.779	206.653	23.6875	25.5027	26.1396	-0.8304	-0.6678	-0.1714	3.1284	2.7294	2.3242	Kirmizi_Pistachio
66019	1202.36	416.321	211.217	0.8617	289.928	0.9078	72728	0.7284	1.9711	0.5739	0.6964	0.0063	0.0032	0.485	0.9559	220.83	206.911	196.638	25.0799	27.3182	28.479	-0.6049	-0.6266	-0.5972	2.3452	2.3743	2.4306	Kirmizi_Pistachio
67255	1156.59	426.769	206.143	0.8756	292.629	0.9549	70429	0.726	2.0703	0.6318	0.6857	0.0063	0.0031	0.4702	0.9734	225.958	218.548	202.396	24.1428	26.1786	26.1096	-0.8635	-0.7053	-0.7227	2.86	2.6228	2.786	Kirmizi_Pistachio
79285	1760.39	459.73	226.085	0.8707	317.724	0.9405	84303	0.7462	2.0334	0.3215	0.6911	0.0058	0.0029	0.4776	0.9712	205.553	202.241	188.61	22.5835	24.2996	23.4754	-0.3387	-0.2737	-0.1947	2.1496	2.1209	2.2762	Kirmizi_Pistachio
78792	1216.7	461.428	225.263	0.8727	316.735	0.9625	81864	0.7519	2.0484	0.6688	0.6864	0.0059	0.0029	0.4712	0.9652	224.321	216.045	206.243	24.281	26.8168	23.7481	-0.8536	-0.692	-0.614	2.8676	2.5347	2.6909	Kirmizi_Pistachio
80420	1194.03	433.691	251.27	0.8151	319.99	0.9253	86913	0.6862	1.726	0.7088	0.7378	0.0054	0.0031	0.5444	0.9396	223.578	212.79	185.285	24.0267	24.2936	24.496	-0.6993	-0.639	-0.6197	2.623	2.6932	2.7595	Kirmizi_Pistachio
76658	1196.83	432.882	228.78	0.8489	312.416	0.9746	78656	0.7577	1.8921	0.6725	0.7217	0.0056	0.003	0.5209	0.9856	203.576	192.706	174.657	18.4126	19.1372	19.2253	-0.346	-0.2472	-0.0588	2.4493	2.3043	2.1476	Kirmizi_Pistachio
86396	1796.55	498.607	232.101	0.885	331.667	0.8928	96768	0.6142	2.1482	0.3364	0.6652	0.0058	0.0027	0.4425	0.9505	217.668	202.993	184.985	21.9715	22.7449	24.6672	-0.8391	-0.8022	-1.2257	3.1174	2.8872	4.5264	Kirmizi_Pistachio
96582	1627.58	489.856	256.214	0.8523	350.674	0.9784	98716	0.7968	1.9119	0.4582	0.7159	0.0051	0.0027	0.5125	0.9798	221.184	219.142	207.366	21.5142	24.3325	25.6904	-0.6849	-0.6754	-0.3987	2.9153	2.7946	2.5498	Kirmizi_Pistachio
67659	1446.43	396.517	226.153	0.8214	293.507	0.9134	74071	0.7631	1.7533	0.4064	0.7402	0.0059	0.0033	0.5479	0.9607	212.401	204.508	186.265	23.0826	24.0397	24.7538	-0.417	-0.4411	-0.359	2.2057	2.334	2.6809	Kirmizi_Pistachio
68568	2188.75	432.757	256.941	0.8047	295.472	0.7737	88628	0.5003	1.6843	0.1799	0.6828	0.0063	0.0037	0.4662	0.7852	199.079	186.406	175.981	15.9617	17.0346	19.5714	-0.2154	-0.0303	0.302	3.3887	3.535	4.4742	Kirmizi_Pistachio
72583	2193.45	492.056	207.891	0.9064	303.999	0.8653	83879	0.6993	2.3669	0.1896	0.6178	0.0068	0.0029	0.3817	0.9034	211.181	203.419	187.061	19.9058	21.4991	24.6095	-0.6678	-0.5259	-0.0864	3.2126	2.9719	2.8996	Kirmizi_Pistachio
96161	1259.15	457.018	270.346	0.8063	349.909	0.9807	98054	0.7793	1.6905	0.7622	0.7656	0.0048	0.0028	0.5862	0.991	216.963	209.655	196.832	19.6524	19.944	20.6843	-0.593	-0.4578	0.1025	3.3809	3.2267	3.2606	Kirmizi_Pistachio
71131	1263.32	418.78	227.512	0.8396	300.943	0.9295	76525	0.6951	1.8407	0.5601	0.7186	0.0059	0.0032	0.5164	0.9506	217.022	201.987	171.232	23.5306	24.0012	25.7411	-0.4722	-0.3003	-0.1378	2.5698	2.4695	2.8489	Kirmizi_Pistachio
80569	1317.61	498.032	212.635	0.9043	320.287	0.9534	84508	0.6326	2.3422	0.5832	0.6431	0.0062	0.0026	0.4136	0.9687	227.645	219.528	198.162	19.7817	20.0033	21.2102	-1.6059	-1.5706	-0.8891	5.3838	5.3571	4.5808	Kirmizi_Pistachio
80553	1278	471.291	223.882	0.88	320.255	0.9479	84983	0.6946	2.1051	0.6198	0.6795	0.0059	0.0028	0.4618	0.972	206.805	195.959	186.157	20.9106	24.6347	27.8121	0.1643	0.324	0.2701	2.5375	2.3994	2.4673	Kirmizi_Pistachio
88483	1415.93	461.235	247.278	0.8441	335.649	0.9506	93081	0.7223	1.8652	0.5546	0.7277	0.0052	0.0028	0.5296	0.9878	212.742	202.648	197.464	23.4912	26.1019	28.9316	-0.0538	0.207	0.3417	2.5414	2.4697	2.4396	Kirmizi_Pistachio
80000	2102.41	466.739	229.681	0.8705	319.154	0.9286	86153	0.7386	2.0321	0.2274	0.6838	0.0058	0.0029	0.4676	0.9502	215.904	214.345	205.831	24.2224	26.0105	24.8725	-0.7456	-0.6024	-0.3617	2.8741	2.6563	2.4255	Kirmizi_Pistachio
78543	1534.86	468.67	216.698	0.8867	316.234	0.961	81730	0.7317	2.1628	0.419	0.6747	0.006	0.0028	0.4553	0.9847	209.66	200.395	185.137	20.99	21.084	21.0153	-0.7233	-0.711	-0.6348	2.57	2.5766	2.4221	Kirmizi_Pistachio
74794	1295.99	423.712	226.974	0.8444	308.595	0.9805	76285	0.7483	1.8668	0.5596	0.7283	0.0057	0.003	0.5304	0.9902	221.014	211.691	196.298	25.8147	26.8111	24.2513	-0.7833	-0.679	-0.7138	2.6662	2.4571	2.6747	Kirmizi_Pistachio
79594	1196.18	490.742	215.462	0.8985	318.343	0.9526	83551	0.6439	2.2776	0.699	0.6487	0.0062	0.0027	0.4208	0.9584	221.816	214.528	204.023	19.4771	20.3717	21.252	-0.9564	-0.7515	-0.3363	4.1453	3.6905	3.178	Kirmizi_Pistachio
43654	1793.35	367.918	161.334	0.8987	235.758	0.8381	52089	0.6655	2.2805	0.1706	0.6408	0.0084	0.0037	0.4106	0.9364	200.465	191.522	179.323	21.5366	22.5034	19.5111	-0.4771	-0.4973	-0.35	2.1199	2.1546	2.6693	Kirmizi_Pistachio
66305	2004.26	461.479	216.334	0.8833	290.555	0.825	80371	0.5262	2.1332	0.2074	0.6296	0.007	0.0033	0.3964	0.8456	209.831	200.62	183.314	21.6575	21.3987	20.3358	-0.778	-0.6541	-0.301	2.7113	2.6396	3.0958	Kirmizi_Pistachio
60287	1164.45	393.705	205.368	0.8532	277.056	0.9185	65637	0.6886	1.9171	0.5587	0.7037	0.0065	0.0034	0.4952	0.9494	204.293	196.399	177.229	22.5952	23.0425	19.1643	-0.2634	-0.2469	-0.2538	2.114	2.222	2.5712	Kirmizi_Pistachio
46303	1024.16	359.189	167.614	0.8844	242.806	0.9576	48355	0.6937	2.1429	0.5547	0.676	0.0078	0.0036	0.457	0.9792	207.219	197.443	179.683	20.5701	21.7046	21.057	-0.8089	-0.7894	-0.824	2.6083	2.5295	2.518	Kirmizi_Pistachio
69072	1181.98	428.073	218.074	0.8605	296.556	0.9147	75516	0.7136	1.963	0.6213	0.6928	0.0062	0.0032	0.4799	0.9421	207.949	201.476	193.697	24.4163	26.306	22.6372	-0.3334	-0.3528	-0.4191	1.8965	1.9504	2.2384	Kirmizi_Pistachio
63036	1183.61	407.18	214.71	0.8497	283.302	0.9128	69056	0.6475	1.8964	0.5654	0.6958	0.0065	0.0034	0.4841	0.918	195.42	183.509	178.596	21.4061	23.7909	28.1926	0.3718	0.5538	0.69	2.6212	2.7709	2.6168	Kirmizi_Pistachio
61736	1824.9	400.701	246.458	0.7885	280.365	0.787	78445	0.6199	1.6258	0.233	0.6997	0.0065	0.004	0.4896	0.7959	208.719	197.524	182.858	21.6221	22.3879	21.5957	-0.5782	-0.5011	-0.231	2.4015	2.3288	2.4561	Kirmizi_Pistachio
74642	1260.98	446.343	217.876	0.8728	308.281	0.9575	77954	0.7183	2.0486	0.5899	0.6907	0.006	0.0029	0.477	0.9773	191.42	180.356	174.679	14.4533	15.3231	18.1096	-0.0447	0.0552	0.0701	2.6843	2.7301	3.6458	Kirmizi_Pistachio
66566	1348.13	382.057	232.979	0.7926	291.126	0.9032	73697	0.6676	1.6399	0.4603	0.762	0.0057	0.0035	0.5806	0.9522	208.918	196.076	180.122	22.2398	23.8589	26.7395	-0.3946	-0.3288	-0.5629	2.3385	2.2799	2.8024	Kirmizi_Pistachio
69030	1213.47	407.47	223.767	0.8357	296.465	0.9448	73063	0.752	1.821	0.5891	0.7276	0.0059	0.0032	0.5294	0.964	218.976	206.655	189.028	26.9515	29.4493	33.03	-0.5255	-0.4538	-0.3388	2.2202	2.0571	1.9778	Kirmizi_Pistachio
90941	1208.36	456.303	257.16	0.8261	340.279	0.9868	92161	0.7675	1.7744	0.7827	0.7457	0.005	0.0028	0.5561	0.9868	221.31	209.797	195.538	21.8817	21.0811	20.1851	-1.0514	-0.8473	-0.3995	3.6436	3.2313	2.8033	Kirmizi_Pistachio
68796	1908.74	438.695	236.215	0.8427	295.962	0.8664	79400	0.6519	1.8572	0.2373	0.6746	0.0064	0.0034	0.4551	0.8453	208.594	195.264	176.558	22.0949	21.6244	19.3303	-0.6133	-0.5772	-0.3205	2.4347	2.4847	2.5172	Kirmizi_Pistachio
89579	1295.78	496.301	247.279	0.867	337.721	0.9271	96618	0.704	2.007	0.6704	0.6805	0.0055	0.0028	0.463	0.9294	221.637	211.549	196.91	24.816	25.4496	23.5856	-0.8794	-0.8264	-0.4836	2.9613	3.0216	2.93	Kirmizi_Pistachio
72612	1075.49	431.426	216.497	0.865	304.06	0.9797	74117	0.8003	1.9928	0.7889	0.7048	0.0059	0.003	0.4967	0.9898	199.502	186.611	171.132	15.2779	15.775	18.0442	-0.422	-0.1391	0.0533	3.278	3.0278	2.9815	Kirmizi_Pistachio
75423	1264.01	466.861	217.957	0.8843	309.89	0.9314	80979	0.6273	2.142	0.5932	0.6638	0.0062	0.0029	0.4406	0.9437	206.587	198.23	190.756	17.4223	17.5893	18.1539	-0.9242	-0.856	-0.6278	3.4627	3.4184	3.9611	Kirmizi_Pistachio
44436	1056.62	376.857	152.191	0.9148	237.861	0.9357	47489	0.7485	2.4762	0.5002	0.6312	0.0085	0.0034	0.3984	0.9865	194.796	184.845	173.643	16.9089	17.7405	17.9528	-0.5538	-0.4522	-0.4419	2.4804	2.343	3.0165	Kirmizi_Pistachio
74976	1644.7	441.293	232.134	0.8505	308.97	0.9319	80456	0.7061	1.901	0.3483	0.7001	0.0059	0.0031	0.4902	0.9319	227.44	221.615	203.67	24.5592	26.582	26.3375	-0.9224	-0.8197	-0.7041	3.1726	2.9122	2.7391	Kirmizi_Pistachio
73148	1309.84	469.049	208.314	0.896	305.18	0.9376	78014	0.6341	2.2516	0.5358	0.6506	0.0064	0.0028	0.4233	0.9532	202.863	189.961	168.918	18.4335	18.9336	20.541	-0.3705	-0.3983	-0.2728	2.4287	2.4066	2.1295	Kirmizi_Pistachio
71322	1875.82	412.378	228.896	0.8318	301.347	0.9079	78559	0.7448	1.8016	0.2547	0.7308	0.0058	0.0032	0.534	0.9621	214.67	202.225	184.374	22.1253	23.3816	25.5649	-0.6412	-0.5195	-0.2915	2.5386	2.4525	2.4787	Kirmizi_Pistachio
80415	1933.29	472.152	241.14	0.8597	319.981	0.872	92215	0.6852	1.958	0.2704	0.6777	0.0059	0.003	0.4593	0.8993	234.433	230.862	218.746	24.8842	27.0139	26.961	-1.228	-1.0913	-0.9874	3.6858	3.2739	2.9518	Kirmizi_Pistachio
72193	1157.49	454.625	204.977	0.8926	303.181	0.9689	74513	0.7495	2.2179	0.6771	0.6669	0.0063	0.0028	0.4447	0.9864	212.377	197.493	172.082	17.8426	17.5798	20.8647	-0.8021	-0.6622	0.0042	3.5584	3.3452	3.4439	Kirmizi_Pistachio
69281	1858.31	429.652	220.822	0.8578	297.004	0.8981	77141	0.7029	1.9457	0.2521	0.6913	0.0062	0.0032	0.4778	0.9297	221.375	212.669	193.284	21.8043	22.3881	19.8455	-1.1285	-1.0583	-0.8013	3.4886	3.3744	3.4119	Kirmizi_Pistachio
71613	1099.27	438.069	214.972	0.8713	301.961	0.9586	74708	0.7366	2.0378	0.7447	0.6893	0.0061	0.003	0.4751	0.9682	228.743	222.515	208.532	24.2599	26.2758	27.4978	-0.8169	-0.6409	-0.4089	2.8092	2.5887	2.2401	Kirmizi_Pistachio
95694	2098.87	481.396	279.676	0.8139	349.058	0.8791	108857	0.7008	1.7213	0.273	0.7251	0.005	0.0029	0.5258	0.905	225.929	220.133	206.572	21.383	23.4867	24.9829	-0.6763	-0.7022	-0.0021	3.1226	3.3807	2.6934	Kirmizi_Pistachio
73596	1193.01	450.057	212.218	0.8818	306.113	0.9713	75770	0.7174	2.1207	0.6498	0.6802	0.0061	0.0029	0.4626	0.9811	209.817	199.046	181.167	17.7746	17.4013	16.4636	-0.9502	-0.9895	-0.4389	3.511	3.5991	4.1764	Kirmizi_Pistachio
64724	2328.08	395.763	221.094	0.8294	287.07	0.8523	75936	0.6011	1.79	0.1501	0.7254	0.0061	0.0034	0.5261	0.9418	208.609	199.631	180.32	22.8934	24.5243	26.5907	-0.2357	-0.1933	-0.0405	2.29	2.3083	2.5336	Kirmizi_Pistachio
82705	1169.94	460.501	233.071	0.8625	324.505	0.9663	85588	0.7628	1.9758	0.7593	0.7047	0.0056	0.0028	0.4966	0.9811	227.971	221.422	207.568	22.1316	23.2906	22.599	-1.1192	-0.8811	-0.7289	3.9647	3.5722	3.6228	Kirmizi_Pistachio
74761	1702.71	473.916	207.13	0.8994	308.527	0.9298	80402	0.7033	2.288	0.324	0.651	0.0063	0.0028	0.4238	0.9697	218.349	207.464	183.415	21.8194	22.73	21.3867	-0.9515	-0.7498	-0.3589	3.2423	2.9751	2.8658	Kirmizi_Pistachio
77471	1151.92	439.991	243.102	0.8335	314.069	0.9024	85849	0.7141	1.8099	0.7337	0.7138	0.0057	0.0031	0.5095	0.9222	226.124	221.653	207.157	24.6509	26.2568	26.6954	-0.8915	-0.7969	-0.701	2.863	2.6556	2.7135	Kirmizi_Pistachio
59875	1236.74	392.974	200.68	0.8598	276.107	0.941	63631	0.7252	1.9582	0.4919	0.7026	0.0066	0.0034	0.4937	0.9667	202.41	191.992	169.994	16.3609	17.7646	19.7772	-0.4582	-0.2813	-0.0269	3.0928	2.9337	3.0074	Kirmizi_Pistachio
68172	1283.08	439.984	208.102	0.8811	294.617	0.9176	74292	0.7259	2.1143	0.5204	0.6696	0.0065	0.0031	0.4484	0.948	206.079	192.298	175.947	19.9757	20.7059	21.8621	-0.4755	-0.4118	-0.3336	2.3046	2.3593	2.8359	Kirmizi_Pistachio
86590	1315.94	468.785	256.911	0.8365	332.039	0.8962	96622	0.7081	1.8247	0.6284	0.7083	0.0054	0.003	0.5017	0.9154	219.197	206.168	196.241	27.724	29.6497	27.4079	-0.5937	-0.6152	-0.5535	1.9905	2.0717	2.1592	Kirmizi_Pistachio
80167	1145.05	479.428	215.003	0.8938	319.487	0.9913	80872	0.7716	2.2299	0.7684	0.6664	0.006	0.0027	0.4441	0.9902	238.54	240.506	233.177	21.4938	20.8684	24.0606	-1.455	-1.5337	-0.9573	4.4646	4.589	2.9314	Kirmizi_Pistachio
60796	2022.24	440.369	201.678	0.889	278.223	0.8439	72042	0.6529	2.1835	0.1868	0.6318	0.0072	0.0033	0.3992	0.8716	202.896	186.446	172.919	21.9529	22.4387	24.3738	0.1075	0.1723	0.0761	1.9673	2.0043	1.8664	Kirmizi_Pistachio
72460	1187.19	443.712	215.114	0.8746	303.742	0.9519	76124	0.7555	2.0627	0.646	0.6845	0.0061	0.003	0.4686	0.9666	210.653	200.488	186.545	21.6977	21.9138	19.8855	-0.9302	-0.8342	-0.5898	2.8684	2.846	3.0216	Kirmizi_Pistachio
70839	1257.66	449.199	206.98	0.8875	300.325	0.9477	74745	0.7474	2.1703	0.5628	0.6686	0.0063	0.0029	0.447	0.9701	218.466	209.419	194.577	23.3662	24.6507	25.8943	-0.789	-0.5515	-0.3685	2.7411	2.5973	2.762	Kirmizi_Pistachio
84747	1187.13	473.099	231.746	0.8718	328.486	0.9811	86380	0.7908	2.0415	0.7557	0.6943	0.0056	0.0027	0.4821	0.9842	215.179	207.24	191.821	19.7554	19.3932	20.3609	-1.0185	-0.8691	-0.1862	3.7559	3.5372	3.1595	Kirmizi_Pistachio
81075	1211.98	493.302	215.004	0.9	321.291	0.9559	84819	0.6858	2.2944	0.6936	0.6513	0.0061	0.0027	0.4242	0.9733	226.821	214.138	192.174	19.8929	20.3194	21.9713	-1.3894	-1.1476	-0.2681	4.7074	4.3263	4.1142	Kirmizi_Pistachio
67688	1259.53	460.924	200.53	0.9004	293.57	0.9242	73239	0.7102	2.2985	0.5362	0.6369	0.0068	0.003	0.4057	0.9324	212.617	203.907	187.732	19.6145	22.2243	26.9503	-0.3439	-0.0789	0.1168	3.3243	2.9718	2.9672	Kirmizi_Pistachio
92938	1558.88	504.601	238.964	0.8808	343.995	0.9519	97639	0.7178	2.1116	0.4806	0.6817	0.0054	0.0026	0.4647	0.9813	202.566	193.119	181.633	16.9254	18.0096	20.2814	-0.8868	-0.7721	-0.3714	3.4915	3.3546	3.3414	Kirmizi_Pistachio
70167	1093.53	419.13	217.798	0.8544	298.897	0.9573	73298	0.695	1.9244	0.7374	0.7131	0.006	0.0031	0.5086	0.9787	203.786	192.701	175.695	15.183	15.7124	16.3432	-0.2299	-0.0185	0.3614	3.4687	3.5595	5.3035	Kirmizi_Pistachio
69231	1098.69	415.884	217.252	0.8527	296.897	0.9682	71507	0.7414	1.9143	0.7207	0.7139	0.006	0.0031	0.5096	0.9756	226.046	214.852	185.748	26.1162	27.1247	29.5872	-0.9554	-0.8597	-0.6638	2.7889	2.6314	2.5196	Kirmizi_Pistachio
84700	1655.91	449.498	246.162	0.8367	328.395	0.9374	90355	0.7343	1.826	0.3882	0.7306	0.0053	0.0029	0.5338	0.9746	205.657	194.933	183.133	21.5538	23.117	26.9788	-0.05	0.1219	0.4375	2.5527	2.6145	2.6582	Kirmizi_Pistachio
68189	1271.93	447.727	202.429	0.892	294.654	0.9203	74096	0.6903	2.2118	0.5297	0.6581	0.0066	0.003	0.4331	0.9579	208.131	193.513	186.828	18.3228	18.945	21.4579	-1.1366	-0.9316	-1.3428	3.543	3.0632	4.3256	Kirmizi_Pistachio
84561	2020.35	500.406	242.445	0.8748	328.126	0.8579	98567	0.6699	2.064	0.2603	0.6557	0.0059	0.0029	0.43	0.8875	217.65	209.091	188.886	22.5937	23.785	23.3334	-0.8506	-0.7833	-0.6849	2.8545	2.7554	2.7177	Kirmizi_Pistachio
72606	1188.31	435.687	221.797	0.8607	304.047	0.9408	77177	0.7006	1.9644	0.6461	0.6979	0.006	0.0031	0.487	0.9566	220.283	205.406	178.581	19.7729	20.1341	22.0939	-0.8861	-0.455	0.2177	3.7188	3.6601	4.3209	Kirmizi_Pistachio
55583	1684.03	419.947	180.975	0.9024	266.027	0.8917	62335	0.6582	2.3205	0.2463	0.6335	0.0076	0.0033	0.4013	0.9312	206.489	198.109	184.749	17.4049	18.143	19.9509	-0.8853	-0.5967	-0.1157	3.4028	3.0431	2.9512	Kirmizi_Pistachio
72383	1575.46	415.199	232.864	0.8279	303.58	0.9262	78153	0.6443	1.783	0.3665	0.7312	0.0057	0.0032	0.5346	0.9532	215.511	205.206	184.466	26.4946	27.2417	26.4428	-0.485	-0.4373	-0.404	2.1589	2.123	2.0481	Kirmizi_Pistachio
75511	1895.16	424.759	257.445	0.7954	310.07	0.8716	86637	0.7243	1.6499	0.2642	0.73	0.0056	0.0034	0.5329	0.8792	211.665	203.199	187.123	23.0089	23.7484	24.2347	-0.5985	-0.5271	-0.1662	2.4953	2.4998	2.6183	Kirmizi_Pistachio
81672	1918.85	487.353	246.694	0.8624	322.472	0.8656	94350	0.709	1.9755	0.2787	0.6617	0.006	0.003	0.4378	0.8649	218.748	211.453	191.519	25.0737	25.3558	25.1381	-0.7189	-0.5902	-0.233	2.6762	2.5726	2.2177	Kirmizi_Pistachio
86369	1420.4	482.909	233.373	0.8755	331.615	0.9381	92068	0.6486	2.0693	0.538	0.6867	0.0056	0.0027	0.4716	0.9758	223.638	214.446	193.654	27.4244	29.5153	29.355	-0.6892	-0.5714	-0.4351	2.3727	2.2183	2.1233	Kirmizi_Pistachio
68952	1107.36	419.745	215.206	0.8586	296.298	0.9612	71738	0.7352	1.9504	0.7066	0.7059	0.0061	0.0031	0.4983	0.9719	211.43	204.692	191.173	21.4632	22.5489	23.5441	-0.6038	-0.5625	-0.557	2.6096	2.6242	2.7179	Kirmizi_Pistachio
76357	1262.78	450.645	223.309	0.8686	311.802	0.9471	80618	0.7097	2.018	0.6017	0.6919	0.0059	0.0029	0.4787	0.9661	196.059	186.917	176.525	16.3772	17.4748	17.532	-0.2775	-0.1024	0.3911	3.3991	3.2404	4.2017	Kirmizi_Pistachio
75940	1220.28	458.553	216.187	0.8819	310.95	0.9562	79418	0.7602	2.1211	0.6409	0.6781	0.006	0.0028	0.4598	0.9754	198.518	183.346	146.788	18.6529	19.3834	20.0152	0.0638	0.4421	0.826	2.4913	2.6311	3.0396	Kirmizi_Pistachio
79328	1545.7	421.27	249.573	0.8056	317.81	0.9545	83110	0.7265	1.688	0.4172	0.7544	0.0053	0.0031	0.5691	0.9607	227.522	219.58	201.282	25.1825	27.3752	25.6605	-0.8968	-0.6876	-0.259	3.0448	2.6495	2.2446	Kirmizi_Pistachio
73958	1180.9	450.938	213.161	0.8812	306.865	0.9737	75956	0.7606	2.1155	0.6664	0.6805	0.0061	0.0029	0.4631	0.9797	220.318	203.919	192.87	22.9496	22.9172	22.4849	-0.744	-0.5346	-0.5992	2.796	2.4904	2.3857	Kirmizi_Pistachio
62040	1254.08	387.215	233.221	0.7983	281.055	0.863	71892	0.6587	1.6603	0.4957	0.7258	0.0062	0.0038	0.5268	0.8747	214.618	201.427	186.64	23.7166	23.961	23.9515	-0.5429	-0.4872	-0.49	2.5547	2.5048	3.1474	Kirmizi_Pistachio
67202	1769.49	408.156	234.541	0.8184	292.514	0.8682	77405	0.6413	1.7402	0.2697	0.7167	0.0061	0.0035	0.5136	0.8938	202.189	191.19	178.824	20.9181	20.9317	19.9835	-0.2217	-0.2399	-0.1535	2.2503	2.2901	2.1965	Kirmizi_Pistachio
68928	1126.9	425.845	225.745	0.8479	296.246	0.9171	75159	0.6612	1.8864	0.6821	0.6957	0.0062	0.0033	0.484	0.9129	221.919	214.45	205.054	28.2359	30.3782	29.6568	-0.555	-0.4743	-0.297	2.1939	2.1638	2.2083	Kirmizi_Pistachio
62771	1667.17	349.803	248.356	0.7042	282.706	0.8771	71565	0.6776	1.4085	0.2838	0.8082	0.0056	0.004	0.6532	0.92	195.402	183.334	163.747	19.3406	18.9493	15.1769	-0.1796	-0.0798	-0.04	2.2339	2.1637	2.3553	Kirmizi_Pistachio
82531	1237.11	493.597	224.968	0.8901	324.163	0.9297	88769	0.726	2.1941	0.6777	0.6567	0.006	0.0027	0.4313	0.9463	216.795	208.77	188.263	25.5306	26.7028	22.9697	-0.5005	-0.3989	-0.2755	2.4985	2.4182	2.3024	Kirmizi_Pistachio
75869	1658.26	462.082	224.624	0.8739	310.804	0.9015	84157	0.7306	2.0571	0.3467	0.6726	0.0061	0.003	0.4524	0.9307	213.125	203.321	191.684	23.5186	24.144	24.7345	-0.6007	-0.4718	-0.4308	2.563	2.478	2.3639	Kirmizi_Pistachio
66694	1115.02	411.014	215.567	0.8514	291.406	0.9606	69426	0.7626	1.9067	0.6741	0.709	0.0062	0.0032	0.5027	0.9584	215.469	203.593	191.702	22.3708	24.2531	25.1645	-0.7357	-0.4549	-0.419	2.9799	2.9152	2.6568	Kirmizi_Pistachio
73607	1070.15	428.605	219.373	0.8591	306.136	0.9909	74281	0.7982	1.9538	0.8077	0.7143	0.0058	0.003	0.5102	0.9968	216.837	206.619	186.988	18.6741	18.9521	21.7716	-1	-0.5618	0.0594	4.0868	3.5127	3.37	Kirmizi_Pistachio
74365	1447.84	432.97	222.557	0.8578	307.708	0.9544	77918	0.7861	1.9454	0.4458	0.7107	0.0058	0.003	0.5051	0.9826	207.672	197.008	190.705	18.844	19.584	19.6017	-0.4602	-0.1973	0.2187	3.7348	3.7669	3.5961	Kirmizi_Pistachio
77691	1234.5	437.955	242.657	0.8325	314.514	0.9337	83209	0.6518	1.8048	0.6406	0.7181	0.0056	0.0031	0.5157	0.9308	230.594	227.61	212.767	23.9376	25.6197	23.8858	-1.2294	-1.1493	-0.7911	4.0144	3.8268	3.275	Kirmizi_Pistachio
59928	1048.6	404.649	193.264	0.8786	276.229	0.9565	62656	0.7494	2.0938	0.6849	0.6826	0.0068	0.0032	0.466	0.9757	213.369	203.845	192.556	22.8753	23.7923	23.6097	-0.5115	-0.4143	-0.3154	2.5955	2.4251	2.2392	Kirmizi_Pistachio
50945	1508.88	363.929	197.026	0.8408	254.686	0.8751	58217	0.6403	1.8471	0.2812	0.6998	0.0071	0.0039	0.4898	0.9046	205.555	191.031	177.992	19.8526	19.6964	17.9496	-0.6958	-0.72	-0.4892	2.5452	2.7437	2.4479	Kirmizi_Pistachio
70841	1279.32	409.272	226.596	0.8327	300.329	0.9493	74621	0.7121	1.8062	0.5439	0.7338	0.0058	0.0032	0.5385	0.9726	203.626	194.755	182.288	19.7078	21.7796	21.6489	-0.3278	-0.0916	-0.0684	3.0888	3.1196	3.8577	Kirmizi_Pistachio
73334	1099.47	413.738	227.958	0.8345	305.568	0.9716	75478	0.7595	1.815	0.7623	0.7386	0.0056	0.0031	0.5455	0.99	217.045	206.945	197.818	22.2177	25.3135	24.6713	-0.4388	-0.241	0.022	2.6712	2.2409	2.5081	Kirmizi_Pistachio
68718	1117.58	387.019	228.858	0.8064	295.795	0.96	71580	0.7279	1.6911	0.6914	0.7643	0.0056	0.0033	0.5841	0.9878	213.194	204.23	187.394	26.8482	27.5263	25.5198	-0.2256	-0.2792	-0.2986	1.8305	1.7745	1.8352	Kirmizi_Pistachio
62005	1094.85	421.791	195.233	0.8864	280.976	0.9351	66305	0.7568	2.1604	0.65	0.6661	0.0068	0.0031	0.4438	0.9587	202.089	195.603	187.112	19.7134	19.8905	19.0555	-0.5874	-0.584	-0.6689	2.4631	2.4493	2.8731	Kirmizi_Pistachio
76935	1149.8	446.312	224.841	0.8638	312.98	0.9607	80083	0.7509	1.985	0.7313	0.7013	0.0058	0.0029	0.4918	0.9762	224.747	218.18	204.046	26.4805	30.0939	27.7282	-0.7226	-0.6136	-0.4349	2.4495	2.2888	2.0895	Kirmizi_Pistachio
61851	1005.11	402.003	198.782	0.8692	280.626	0.9846	62817	0.797	2.0223	0.7694	0.6981	0.0065	0.0032	0.4873	0.9855	215.245	208.32	191.735	21.0366	21.1316	23.4843	-0.7068	-0.5716	-0.2673	3.2252	3.1027	2.7505	Kirmizi_Pistachio
88823	1284.72	487.998	234.926	0.8765	336.293	0.9742	91179	0.7444	2.0772	0.6763	0.6891	0.0055	0.0026	0.4749	0.9865	215.407	209.635	195.746	20.9889	21.6998	18.9731	-1.1025	-0.9808	-0.8154	3.7803	3.508	3.9349	Kirmizi_Pistachio
65035	1029.53	417.844	200.749	0.877	287.759	0.9828	66176	0.7814	2.0814	0.771	0.6887	0.0064	0.0031	0.4743	0.9872	232.582	221.266	194.994	24.0882	25.7408	24.2081	-1.2239	-0.7705	-0.6136	3.7067	3.0594	2.7262	Kirmizi_Pistachio
69802	1086.96	438.394	206.165	0.8825	298.118	0.9754	71565	0.7465	2.1264	0.7424	0.68	0.0063	0.003	0.4624	0.9833	221.142	209.468	189.292	24.7633	27.3369	28.7002	-0.4228	-0.1052	0.0683	2.4549	2.2775	2.075	Kirmizi_Pistachio
69816	1637.18	398.565	230.714	0.8154	298.148	0.9256	75427	0.7451	1.7275	0.3273	0.7481	0.0057	0.0033	0.5596	0.9667	219.803	210.151	186.66	29.0001	30.1829	28.2623	-0.4904	-0.4857	-0.4417	2.0235	2.1354	2.1612	Kirmizi_Pistachio
71912	1120.79	453.74	213.78	0.8821	302.591	0.9316	77188	0.7467	2.1225	0.7194	0.6669	0.0063	0.003	0.4447	0.9439	226.495	220.954	206.076	26.5231	28.1651	24.6678	-0.8788	-0.8892	-0.6626	2.783	2.876	2.5165	Kirmizi_Pistachio
72061	1577.65	415.266	241.888	0.8128	302.904	0.9136	78880	0.6954	1.7168	0.3638	0.7294	0.0058	0.0034	0.5321	0.9134	206.373	196.313	187.738	21.7679	23.4705	21.8184	-0.3404	-0.2775	0.2004	2.2408	2.2825	2.6837	Kirmizi_Pistachio
75286	1179.64	438.972	221.344	0.8636	309.608	0.9661	77924	0.7436	1.9832	0.6799	0.7053	0.0058	0.0029	0.4975	0.9866	214.3	202.78	185.354	25.7659	26.6231	25.1599	-0.2225	-0.1204	0.0025	2.068	2.0218	1.9237	Kirmizi_Pistachio
79929	1190.46	491.525	208.038	0.906	319.012	0.9839	81238	0.7794	2.3627	0.7087	0.649	0.0061	0.0026	0.4212	0.9952	207.285	200.151	185.359	19.955	20.1047	18.7122	-0.6866	-0.5917	-0.2506	2.6542	2.5761	2.5441	Kirmizi_Pistachio
79982	1218.16	468.519	220.399	0.8824	319.118	0.9689	82552	0.6927	2.1258	0.6773	0.6811	0.0059	0.0028	0.4639	0.9862	218.25	208.77	187	23.9973	25.4768	26.0578	-0.7196	-0.6986	-0.7564	2.4188	2.3742	2.6694	Kirmizi_Pistachio
74733	1117.51	439.659	219.076	0.867	308.469	0.9712	76950	0.7132	2.0069	0.752	0.7016	0.0059	0.0029	0.4923	0.9879	222.865	217.148	206.707	26.1431	27.6306	28.0149	-0.8031	-0.7071	-0.5417	2.5474	2.3712	2.1099	Kirmizi_Pistachio
68481	1091.24	442.836	199.27	0.893	295.284	0.9825	69700	0.772	2.2223	0.7227	0.6668	0.0065	0.0029	0.4446	0.9881	219.182	205.233	186.242	24.6622	23.3554	20.9181	-0.7461	-0.7205	-0.4729	2.7106	2.6172	2.2876	Kirmizi_Pistachio
70415	1104.86	443.415	206.062	0.8855	299.425	0.9654	72936	0.8029	2.1518	0.7249	0.6753	0.0063	0.0029	0.456	0.9812	217.816	209.936	195.118	26.8224	28.7778	28.7112	-0.3297	-0.2158	-0.1623	2.0442	1.9627	1.9203	Kirmizi_Pistachio
85281	1278.65	485.221	225.24	0.8857	329.52	0.9761	87370	0.6502	2.1542	0.6555	0.6791	0.0057	0.0026	0.4612	0.9935	208.404	199.172	185.717	20.4077	20.6937	19.7348	-0.3867	-0.3323	-0.1046	2.6188	2.608	2.8695	Kirmizi_Pistachio
67389	1137.77	412.216	211.162	0.8588	292.92	0.9646	69863	0.7259	1.9521	0.6542	0.7106	0.0061	0.0031	0.505	0.9857	223.929	205.607	172.594	24.4133	23.0223	21.0038	-0.7211	-0.7844	-0.6893	2.6774	2.7942	2.9851	Kirmizi_Pistachio
75593	1631.61	441.195	225.246	0.8599	310.239	0.9123	82859	0.7245	1.9587	0.3568	0.7032	0.0058	0.003	0.4945	0.9685	213.06	202.241	183.548	26.0729	26.7378	25.1797	-0.3929	-0.3611	-0.3172	1.9555	2.0677	2.5771	Kirmizi_Pistachio
82422	1153.93	459.375	231.502	0.8637	323.949	0.985	83678	0.6718	1.9843	0.7778	0.7052	0.0056	0.0028	0.4973	0.9868	203.911	189.314	164.224	16.2395	16.0633	16.8864	-0.3564	-0.2681	0.0725	2.9624	2.8253	2.8953	Kirmizi_Pistachio
74220	1200.86	458.532	209.698	0.8893	307.408	0.9733	76253	0.747	2.1866	0.6468	0.6704	0.0062	0.0028	0.4495	0.9828	205.478	195.866	186.668	18.3824	19.6015	22.6008	-0.0297	0.1629	0.3878	3.5312	3.5399	3.5249	Kirmizi_Pistachio
72847	1096.62	414.659	232.041	0.8288	304.552	0.9384	77626	0.6662	1.787	0.7612	0.7345	0.0057	0.0032	0.5394	0.964	223.853	212.034	202.739	25.9241	26.575	23.8132	-0.7763	-0.736	-0.4521	2.6558	2.6357	2.4107	Kirmizi_Pistachio
79068	1167.5	464.652	224.873	0.8751	317.289	0.9666	81798	0.7575	2.0663	0.729	0.6829	0.0059	0.0028	0.4663	0.9635	230.481	217.607	191.808	24.8853	23.7899	20.5157	-1.0317	-0.9658	-0.588	3.1826	3.2173	2.5839	Kirmizi_Pistachio
69130	1120.01	426.355	209.586	0.8708	296.68	0.9761	70824	0.6245	2.0343	0.6925	0.6959	0.0062	0.003	0.4842	0.985	206.539	194.435	183.931	15.9388	16.2147	18.2004	-0.9885	-0.4026	0.2057	4.3479	4.2124	4.5887	Kirmizi_Pistachio
70937	1149.48	432.704	217.639	0.8643	300.533	0.9331	76020	0.7246	1.9882	0.6746	0.6945	0.0061	0.0031	0.4824	0.9591	220.03	209.817	191.908	26.7936	28.75	25.8071	-0.5544	-0.5024	-0.3046	2.2416	2.3486	2.2477	Kirmizi_Pistachio
72035	1285.01	422.099	234.567	0.8314	302.849	0.9221	78119	0.7055	1.7995	0.5482	0.7175	0.0059	0.0033	0.5148	0.9263	221.805	208.81	192.054	26.0884	29.7596	30.9785	-0.3199	-0.1225	-0.0998	2.1258	2.0522	2.2463	Kirmizi_Pistachio
92018	1276.66	510.931	232.673	0.8903	342.288	0.9819	93716	0.685	2.1959	0.7095	0.6699	0.0056	0.0025	0.4488	0.9855	218.018	205.421	187.338	18.866	18.9721	18.7796	-1.1055	-0.9034	-0.3068	4.1093	3.7143	3.7466	Kirmizi_Pistachio
76142	1137.08	432.41	238.523	0.8341	311.363	0.9335	81566	0.7095	1.8129	0.74	0.7201	0.0057	0.0031	0.5185	0.94	188.119	180.509	160.486	16.4312	16.7152	16.4759	0.1508	0.1651	0.742	2.5717	2.6981	4.3554	Kirmizi_Pistachio
67057	1309.96	418.095	208.118	0.8673	292.198	0.9588	69938	0.5913	2.0089	0.4911	0.6989	0.0062	0.0031	0.4884	0.9812	199.155	183.96	174.288	15.1917	15.5738	15.4143	-0.1565	0.2142	0.9427	3.8038	4.4639	6.5257	Kirmizi_Pistachio
82682	1857.93	492.81	225.157	0.8895	324.459	0.906	91262	0.6516	2.1887	0.301	0.6584	0.006	0.0027	0.4335	0.9488	212.264	201.917	191.133	19.6745	20.6721	21.8294	-0.7917	-0.7034	-0.5352	3.698	3.6268	3.953	Kirmizi_Pistachio
65579	1608.68	401.894	226.596	0.8259	288.96	0.9307	70465	0.7205	1.7736	0.3184	0.719	0.0061	0.0035	0.517	0.9169	224.995	222.787	211.697	26.1183	28.0898	24.7121	-0.908	-0.9422	-0.5276	3.0571	3.1828	2.3039	Kirmizi_Pistachio
71185	1280.97	439.904	209.448	0.8794	301.057	0.9587	74255	0.7206	2.1003	0.5452	0.6844	0.0062	0.0029	0.4684	0.9837	221.627	211.743	200.226	26.2703	27.5611	28.7173	-0.7318	-0.6954	-0.6683	2.4491	2.366	2.4522	Kirmizi_Pistachio
73579	1153.36	443.809	217.875	0.8712	306.078	0.9345	78739	0.7584	2.037	0.6951	0.6897	0.006	0.003	0.4756	0.9689	208.92	199.757	189.831	19.1873	20.3666	18.9067	-0.4373	-0.3437	-0.4787	2.8053	2.7684	3.027	Kirmizi_Pistachio
59297	1042.93	406.607	200.537	0.8699	274.771	0.8958	66194	0.606	2.0276	0.6851	0.6758	0.0069	0.0034	0.4567	0.9259	220.473	205.38	208.94	23.2284	22.1268	24.7447	-1.1306	-1.0512	-1.8576	3.6127	3.61	9.0848	Kirmizi_Pistachio
72150	1220.83	450.921	216.127	0.8776	303.091	0.9208	78355	0.6826	2.0864	0.6083	0.6722	0.0062	0.003	0.4518	0.9426	224.499	214.295	198.459	26.1188	28.8482	31.2172	-0.6756	-0.4841	-0.5486	2.4378	2.1826	2.5486	Kirmizi_Pistachio
77211	1107.15	442.651	226.456	0.8592	313.541	0.982	78623	0.6827	1.9547	0.7915	0.7083	0.0057	0.0029	0.5017	0.9807	228.377	220.433	206.303	20.6819	20.7985	19.3268	-1.1655	-1.0467	-0.8329	4.1709	3.8791	3.7103	Kirmizi_Pistachio
80219	1275.29	483.322	214.496	0.8961	319.59	0.9628	83320	0.7326	2.2533	0.6198	0.6612	0.006	0.0027	0.4372	0.9852	223.629	211.674	200.305	24.4962	24.6657	25.2395	-0.9351	-0.8964	-0.6312	2.9091	2.8719	2.6041	Kirmizi_Pistachio
62484	1103.25	420.07	200.389	0.8789	282.059	0.9228	67708	0.6376	2.0963	0.6451	0.6715	0.0067	0.0032	0.4509	0.9451	213.041	200.832	178.63	21.6351	23.2713	22.7118	-0.5864	-0.4967	-0.5662	2.4593	2.388	2.6178	Kirmizi_Pistachio
41013	1206.3	344.687	153.058	0.896	228.516	0.943	43493	0.7582	2.252	0.3542	0.663	0.0084	0.0037	0.4395	0.9898	203.413	193.507	183.774	23.4236	24.8457	24.8578	-0.3589	-0.2496	-0.153	1.8432	1.7708	2.1483	Kirmizi_Pistachio
69087	1592.4	446.942	204.805	0.8888	296.588	0.9084	76057	0.6238	2.1823	0.3424	0.6636	0.0065	0.003	0.4404	0.961	204.079	192.969	178.195	18.8618	19.6993	21.5917	-0.1731	0.0194	0.5921	3.0431	3.0911	4.0822	Kirmizi_Pistachio
44984	1753.19	356.999	195.468	0.8368	239.323	0.764	58876	0.5197	1.8264	0.1839	0.6704	0.0079	0.0043	0.4494	0.8208	214.775	201.197	182.226	22.7758	23.504	22.7093	-0.6433	-0.6449	-0.6614	2.4011	2.4589	2.6062	Kirmizi_Pistachio
80180	1753.67	472.38	225.92	0.8782	319.513	0.9139	87730	0.6976	2.0909	0.3276	0.6764	0.0059	0.0028	0.4575	0.9566	206.399	198.877	191.782	19.5426	20.7348	21.9127	-0.4362	-0.2957	-0.0288	3.0285	2.9799	3.2251	Kirmizi_Pistachio
57245	1343.96	393.131	195.995	0.8669	269.975	0.9151	62559	0.6706	2.0058	0.3983	0.6867	0.0069	0.0034	0.4716	0.9459	205.774	192.587	183.852	18.862	21.8153	24.4637	0.2917	0.4579	0.7693	3.6176	3.8228	4.4175	Kirmizi_Pistachio
74506	1186.56	454.411	211.753	0.8848	308	0.9672	77032	0.7542	2.1459	0.665	0.6778	0.0061	0.0028	0.4594	0.9859	224.373	217.968	204.768	17.3147	18.3431	17.5233	-1.4313	-1.2334	-0.7456	5.4469	4.818	4.1668	Kirmizi_Pistachio
79226	1333.7	443.567	236.353	0.8462	317.606	0.9624	82322	0.767	1.8767	0.5597	0.716	0.0056	0.003	0.5127	0.9622	224.392	213.454	192.621	25.179	27.0083	25.3137	-0.5871	-0.5017	-0.5105	2.4502	2.3387	2.4644	Kirmizi_Pistachio
78357	1211.96	467.842	219.224	0.8834	315.86	0.9657	81137	0.7398	2.1341	0.6704	0.6751	0.006	0.0028	0.4558	0.9727	218.215	213.476	197.339	20.4579	21.4868	18.2542	-1.1646	-0.9966	-0.7013	3.7018	3.2996	3.0694	Kirmizi_Pistachio
76603	1674.71	450.537	224.025	0.8676	312.304	0.9242	82888	0.6879	2.0111	0.3432	0.6932	0.0059	0.0029	0.4805	0.9663	195.309	182.564	174.161	15.9101	17.7069	19.8026	0.3254	0.4022	0.8031	3.9684	3.8919	4.7849	Kirmizi_Pistachio
79331	1283.31	472.983	221.293	0.8838	317.817	0.9337	84963	0.7292	2.1374	0.6053	0.6719	0.006	0.0028	0.4515	0.965	222.271	214.288	202.204	20.0175	20.835	20.9808	-1.0088	-0.9186	-0.7458	3.6571	3.5259	3.4491	Kirmizi_Pistachio
81377	1256.67	488.993	231.575	0.8808	321.889	0.9037	90047	0.7368	2.1116	0.6475	0.6583	0.006	0.0028	0.4333	0.915	213.219	208.881	202.719	21.2856	24.2994	25.5435	-0.3466	-0.4406	-0.178	2.7565	2.6583	2.4304	Kirmizi_Pistachio
57946	1104.32	364.042	206.737	0.8231	271.623	0.947	61187	0.6851	1.7609	0.5971	0.7461	0.0063	0.0036	0.5567	0.9803	208.919	194.406	168.669	20.0833	20.3823	21.0513	-0.3574	-0.2961	-0.7226	2.4002	2.393	3.0373	Kirmizi_Pistachio
86161	1197.38	489.043	225.614	0.8872	331.215	0.9921	86849	0.7467	2.1676	0.7552	0.6773	0.0057	0.0026	0.4587	0.9943	233.966	229.14	213.324	18.9685	19.7355	20.5149	-1.3734	-1.1245	-0.8088	4.8976	4.1036	3.355	Kirmizi_Pistachio
63515	1478.39	410.271	212.832	0.8549	284.376	0.9108	69736	0.7212	1.9277	0.3652	0.6931	0.0065	0.0034	0.4804	0.9261	209.487	204.332	199.869	21.3546	24.9077	28.5014	-0.3458	-0.4275	-0.5294	2.8052	2.5533	2.6153	Kirmizi_Pistachio
67864	1104.25	434.823	203.918	0.8832	293.951	0.9634	70443	0.7498	2.1323	0.6994	0.676	0.0064	0.003	0.457	0.9745	227.15	217.538	203.233	23.9946	26.9882	27.4845	-0.7564	-0.6624	-0.61	2.8017	2.5865	2.6738	Kirmizi_Pistachio
77567	1682.11	449.292	229.464	0.8597	314.263	0.9321	83221	0.7396	1.958	0.3445	0.6995	0.0058	0.003	0.4892	0.958	213.291	205.837	197.912	21.627	23.2282	23.8573	-0.6577	-0.5804	-0.3724	2.6991	2.574	2.7662	Kirmizi_Pistachio
79512	1772.02	436.798	238.261	0.8381	318.179	0.9582	82981	0.7447	1.8333	0.3182	0.7284	0.0055	0.003	0.5306	0.9728	197.564	185.113	165.1	14.4273	14.7699	15.9963	-0.5764	-0.4942	-0.4836	2.7701	2.8058	2.947	Kirmizi_Pistachio
66895	1404.94	433.689	201.235	0.8858	291.845	0.9652	69307	0.6601	2.1551	0.4259	0.6729	0.0065	0.003	0.4528	0.9759	200.381	197.128	189.629	16.1945	16.7322	18.7187	-0.1532	-0.0055	0.2143	3.8272	3.7389	3.4628	Kirmizi_Pistachio
68312	1098.52	421.181	209.707	0.8672	294.92	0.9767	69943	0.7857	2.0084	0.7114	0.7002	0.0062	0.0031	0.4903	0.9847	225.871	216.464	193.404	23.9988	24.7253	24.301	-0.8471	-0.6167	-0.4696	2.9881	2.7539	2.76	Kirmizi_Pistachio
94203	1933.76	509.658	240.31	0.8819	346.328	0.9532	98825	0.7265	2.1208	0.3166	0.6795	0.0054	0.0026	0.4618	0.9793	215.618	204.881	186.025	21.1703	21.2532	21.2491	-0.6234	-0.5053	-0.4042	2.7498	2.5709	2.7552	Kirmizi_Pistachio
69733	1748.78	426.004	236.57	0.8316	297.971	0.8678	80360	0.7155	1.8008	0.2865	0.6995	0.0061	0.0034	0.4892	0.881	217.458	211.746	180.053	23.4808	25.4234	23.5152	-0.6041	-0.4291	0.4329	2.4811	2.289	3.4808	Kirmizi_Pistachio
91516	1279.12	522.503	235.611	0.8926	341.353	0.9442	96921	0.6618	2.2177	0.7029	0.6533	0.0057	0.0026	0.4268	0.9465	231.796	231.168	207.456	22.5581	23.9121	29.5733	-0.9724	-0.8962	-0.2954	3.3526	3.0667	2.4933	Kirmizi_Pistachio
63880	1056.7	419.276	197.956	0.8815	285.192	0.9734	65627	0.7752	2.118	0.7189	0.6802	0.0066	0.0031	0.4627	0.98	217.729	209.242	193.189	21.3111	21.4761	20.2519	-0.8607	-0.64	-0.2685	3.4224	2.9635	2.3741	Kirmizi_Pistachio
79867	1147.39	453.709	226.936	0.8659	318.888	0.9847	81110	0.7356	1.9993	0.7623	0.7028	0.0057	0.0028	0.494	0.9876	228.489	219.631	203.907	22.8769	22.7251	20.4024	-1.2542	-1.2069	-0.7412	3.8798	3.7388	3.1534	Kirmizi_Pistachio
82745	1205.86	479.074	223.244	0.8848	324.583	0.9755	84825	0.6889	2.146	0.7151	0.6775	0.0058	0.0027	0.459	0.9851	226.946	217.041	210.158	20.3722	22.6756	24.3471	-0.8082	-0.4818	-0.2536	3.4404	2.8563	2.6145	Kirmizi_Pistachio
91810	1278.41	500.713	237.917	0.8799	341.901	0.9785	93827	0.6398	2.1046	0.7059	0.6828	0.0055	0.0026	0.4663	0.9813	232.801	224.773	211.425	20.8226	21.786	21.4499	-1.2923	-1.1087	-0.6047	4.3776	3.8794	3.3484	Kirmizi_Pistachio
72137	1239.4	428.79	223.926	0.8528	303.064	0.9222	78219	0.7338	1.9149	0.5901	0.7068	0.0059	0.0031	0.4996	0.9566	218.751	212.907	192.744	23.4389	25.0767	25.5402	-0.8169	-0.7934	-0.6214	2.5664	2.5774	2.9565	Kirmizi_Pistachio
59527	1044.67	385.816	202.828	0.8507	275.304	0.9436	63084	0.7506	1.9022	0.6854	0.7136	0.0065	0.0034	0.5092	0.9685	213.444	210.183	197.95	17.4582	19.5472	21.8385	-0.8656	-0.8067	-0.7356	3.531	3.239	3.3046	Kirmizi_Pistachio
77018	1966.58	473.32	217.8	0.8878	313.149	0.9188	83824	0.721	2.1732	0.2503	0.6616	0.0061	0.0028	0.4377	0.9512	224.832	221.001	206.939	26.1186	28.1275	29.1233	-0.864	-0.7404	-0.476	2.7673	2.5283	2.2956	Kirmizi_Pistachio
62633	1117.93	408.281	207.731	0.8609	282.395	0.8995	69631	0.7458	1.9654	0.6298	0.6917	0.0065	0.0033	0.4784	0.9403	230.22	224.246	205.521	25.1553	28.6183	30.6966	-0.9784	-0.9087	-0.8394	2.8718	2.7504	2.7452	Kirmizi_Pistachio
78944	1628.96	469.944	223.735	0.8794	317.04	0.9402	83961	0.5856	2.1005	0.3739	0.6746	0.006	0.0028	0.4551	0.956	212.32	205.602	198.704	19.5127	20.0679	21.053	-0.8204	-0.5519	0.1213	3.7796	3.6402	3.5618	Kirmizi_Pistachio
83486	1421.63	464.799	247.902	0.8459	326.033	0.9357	89227	0.7235	1.8749	0.5191	0.7014	0.0056	0.003	0.492	0.9225	230.541	224.485	209.889	26.6557	30.0204	31.6271	-0.8486	-0.7495	-0.5417	2.5796	2.444	2.1749	Kirmizi_Pistachio
78741	2153.07	432.245	296.821	0.7269	316.632	0.8399	93746	0.6247	1.4562	0.2134	0.7325	0.0055	0.0038	0.5366	0.7814	207.631	198.314	186.691	20.1758	21.9868	23.3692	-0.6499	-0.5883	-0.5026	2.5641	2.4072	2.391	Kirmizi_Pistachio
85845	2041.55	490.657	237.438	0.8751	330.607	0.8941	96011	0.7345	2.0665	0.2588	0.6738	0.0057	0.0028	0.454	0.9382	224.047	208.248	180.067	21.4586	22.793	27.0073	-0.788	-0.5331	-0.5011	3.0151	2.8876	4.276	Kirmizi_Pistachio
77755	1969.29	452.557	232.99	0.8573	314.644	0.9318	83444	0.7154	1.9424	0.252	0.6953	0.0058	0.003	0.4834	0.9389	225.042	217.344	202.399	26.4177	28.1837	28.4563	-0.7692	-0.6718	-0.4899	2.5107	2.3873	2.3096	Kirmizi_Pistachio
69207	2090.73	420.334	223.221	0.8473	296.845	0.9223	75035	0.6597	1.883	0.199	0.7062	0.0061	0.0032	0.4987	0.9391	228.345	218.691	196.869	25.2907	25.3334	30.1699	-0.9463	-0.8033	-0.7108	2.8124	2.7867	3.568	Kirmizi_Pistachio
72426	1348.09	399.011	241.919	0.7952	303.67	0.9411	76961	0.6248	1.6494	0.5008	0.7611	0.0055	0.0033	0.5792	0.9553	227.934	218.16	206.169	24.128	26.0857	27.5343	-1.1191	-0.9545	-0.485	3.4505	3.208	2.9671	Kirmizi_Pistachio
76106	1267.76	448.067	226.92	0.8623	311.289	0.9335	81528	0.7436	1.9746	0.595	0.6947	0.0059	0.003	0.4827	0.953	204.826	195.69	180.773	20.8013	21.9363	20.6257	-0.4162	-0.3446	-0.3936	2.2784	2.2325	2.2751	Kirmizi_Pistachio
62622	1081.58	381.022	215.257	0.8251	282.37	0.9335	67086	0.7072	1.7701	0.6727	0.7411	0.0061	0.0034	0.5492	0.9721	204.348	194.239	180.433	17.3411	17.6962	21.3257	-0.7946	-0.5908	0.0463	3.4663	3.5751	3.9114	Kirmizi_Pistachio
86337	1394.69	492.104	229.696	0.8844	331.553	0.9499	90893	0.7266	2.1424	0.5578	0.6737	0.0057	0.0027	0.4539	0.9725	207.254	195.683	179.069	16.4246	17.2885	20.3282	-1.0268	-0.9237	-0.8328	3.4547	3.3992	4.2686	Kirmizi_Pistachio
63595	1369.75	423.608	206.173	0.8736	284.555	0.9024	70470	0.7061	2.0546	0.4259	0.6717	0.0067	0.0032	0.4512	0.9271	209.431	196.407	182.149	21.9079	23.9084	27.4557	-0.2867	-0.1523	0.0097	2.3468	2.3649	2.9335	Kirmizi_Pistachio
81407	1244.44	497.262	220.633	0.8962	321.948	0.9254	87965	0.5527	2.2538	0.6606	0.6474	0.0061	0.0027	0.4192	0.9447	220.412	207.649	179.874	21.5566	21.6432	24.2982	-0.7744	-0.6144	-0.1795	2.926	2.6899	2.5305	Kirmizi_Pistachio
81323	1533.7	469.937	232.703	0.8688	321.782	0.8799	92428	0.7034	2.0195	0.4345	0.6847	0.0058	0.0029	0.4689	0.9469	207.695	194.704	185.811	18.4668	20.2775	23.1806	-0.4316	-0.2863	-0.1359	3.0166	2.8529	3.5437	Kirmizi_Pistachio
41269	1338.38	370.026	153.034	0.9105	229.228	0.89	46369	0.6439	2.4179	0.2895	0.6195	0.009	0.0037	0.3838	0.9279	197.612	186.503	175.652	18.083	19.2815	19.6241	-0.3768	-0.2495	-0.0783	2.1682	2.0709	2.2075	Kirmizi_Pistachio
74839	1154.96	467.61	210.199	0.8933	308.688	0.9604	77924	0.7694	2.2246	0.705	0.6601	0.0062	0.0028	0.4358	0.9694	215.813	205.043	190.725	18.6246	19.4371	20.889	-0.6109	-0.3566	-0.0456	3.3161	3.102	3.6866	Kirmizi_Pistachio
69505	1143.27	435.773	207.942	0.8788	297.484	0.9558	72719	0.7016	2.0956	0.6682	0.6827	0.0063	0.003	0.466	0.9766	219.006	208.793	191.516	24.563	24.656	23.1841	-0.7364	-0.6861	-0.4938	2.4685	2.4251	2.5478	Kirmizi_Pistachio
83355	2005.08	472.609	239.005	0.8627	325.777	0.8576	97191	0.6887	1.9774	0.2605	0.6893	0.0057	0.0029	0.4752	0.9396	208.257	198.35	176.555	20.0753	19.9142	35.7655	-0.6978	-0.4619	-1.4433	3.0361	3.2671	6.2623	Kirmizi_Pistachio
64171	1246.57	422.106	202.607	0.8773	285.841	0.922	69600	0.7207	2.0834	0.5189	0.6772	0.0066	0.0032	0.4586	0.9554	197.827	185.712	174.031	17.5906	18.8699	21.582	0.1263	0.2469	0.7811	3.3698	3.7634	4.9743	Kirmizi_Pistachio
80622	1269.73	462.596	235.64	0.8605	320.392	0.9166	87958	0.6778	1.9631	0.6284	0.6926	0.0057	0.0029	0.4797	0.9417	216.121	205.452	195.382	22.0583	23.8313	22.4654	-0.7721	-0.7204	-0.6254	2.5755	2.4989	2.5986	Kirmizi_Pistachio
76581	1735.97	477.304	226.253	0.8805	312.259	0.8635	88686	0.6895	2.1096	0.3193	0.6542	0.0062	0.003	0.428	0.9029	207.538	197.198	170.839	26.8426	27.5536	31.4766	0.0551	0.0593	-0.1866	2.0305	2.0881	2.4217	Kirmizi_Pistachio
65537	1216.85	419.489	208.765	0.8674	288.867	0.9353	70073	0.709	2.0094	0.5562	0.6886	0.0064	0.0032	0.4742	0.9528	219.305	213.122	192.755	23.7002	26.4093	27.5177	-0.6104	-0.4004	-0.1626	2.8182	2.5876	2.6064	Kirmizi_Pistachio
59122	1055.34	405.355	192.712	0.8798	274.366	0.9781	60448	0.7281	2.1034	0.6671	0.6769	0.0069	0.0033	0.4581	0.9636	213.66	208.611	196.11	21.5041	22.0668	20.4089	-1.0317	-0.93	-0.7465	3.3203	3.1428	2.9768	Kirmizi_Pistachio
67867	1821.16	425.13	220.223	0.8554	293.957	0.9025	75195	0.714	1.9305	0.2571	0.6915	0.0063	0.0032	0.4781	0.923	199.987	193.382	194.196	17.7874	17.478	16.7636	-0.4223	-0.272	-0.2523	3.107	3.2185	3.9871	Kirmizi_Pistachio
67179	1153.08	423.612	212.504	0.8651	292.464	0.9553	70323	0.6666	1.9934	0.6349	0.6904	0.0063	0.0032	0.4767	0.9502	225.548	217.15	213.786	20.5677	21.5747	21.3201	-1.4173	-0.9365	-0.7507	5.2141	4.3251	4.2134	Kirmizi_Pistachio
66140	1124.07	438.918	201.614	0.8883	290.193	0.9489	69702	0.5716	2.177	0.6578	0.6612	0.0066	0.003	0.4371	0.9516	220.741	211.688	186.735	23.4819	25.6726	26.8573	-0.7456	-0.7629	-0.9047	2.7172	2.7745	3.2703	Kirmizi_Pistachio
54690	1713.1	388.957	263.762	0.7349	263.882	0.713	76702	0.5521	1.4747	0.2342	0.6784	0.0071	0.0048	0.4603	0.6787	207.56	196.886	181.475	24.2749	25.8803	26.0281	-0.2971	-0.2654	-0.2331	1.9635	1.9091	1.88	Kirmizi_Pistachio
80614	1594.68	432.779	244.873	0.8245	320.376	0.9359	86139	0.7492	1.7674	0.3984	0.7403	0.0054	0.003	0.548	0.9685	213.193	203.015	189.997	22.3399	24.7079	27.6629	-0.4202	-0.3127	-0.0082	2.6633	2.621	2.7913	Kirmizi_Pistachio
74079	1306.37	464.078	221.429	0.8788	307.116	0.9035	81992	0.5938	2.0958	0.5455	0.6618	0.0063	0.003	0.4379	0.9179	209.546	200.973	189.685	19.9849	21.6951	24.2543	-0.0149	0.2	0.588	3.3382	3.2569	3.3607	Kirmizi_Pistachio
80777	1211.01	483.241	217.845	0.8926	320.7	0.9577	84342	0.7506	2.2183	0.6921	0.6636	0.006	0.0027	0.4404	0.977	227.594	220.799	210.385	21.0972	22.47	22.5012	-1.4368	-1.1766	-0.6795	5.0973	4.2713	3.8844	Kirmizi_Pistachio
93046	1330.93	483.866	250.41	0.8557	344.195	0.9776	95179	0.6779	1.9323	0.6601	0.7113	0.0052	0.0027	0.506	0.9778	205.81	199.777	185.23	20.8632	23.0613	29.3938	-0.2052	-0.0939	0.2285	2.4292	2.3118	2.3217	Kirmizi_Pistachio
73404	1144.8	472.234	204.595	0.9013	305.714	0.9648	76082	0.7277	2.3081	0.7038	0.6474	0.0064	0.0028	0.4191	0.9673	237.352	236.087	227.684	25.1423	26.4718	28.256	-1.3916	-1.331	-0.9137	4.0467	3.8134	2.7375	Kirmizi_Pistachio
77163	1195.7	461.951	216.051	0.8839	313.444	0.9742	79206	0.6894	2.1382	0.6782	0.6785	0.006	0.0028	0.4604	0.9844	204.934	197.651	186.069	17.6606	19.0819	21.9447	-0.3395	-0.1058	0.3065	3.3252	3.1941	3.4497	Kirmizi_Pistachio
65883	1368.26	414.987	208.477	0.8647	289.629	0.9399	70096	0.7405	1.9906	0.4422	0.6979	0.0063	0.0032	0.4871	0.9696	218.213	208.068	194.572	24.9691	25.9302	24.6651	-0.7939	-0.7885	-0.7996	2.811	2.7324	2.7526	Kirmizi_Pistachio
58917	1058.92	407.291	186.157	0.8894	273.889	0.9736	60515	0.7439	2.1879	0.6603	0.6725	0.0069	0.0032	0.4522	0.9894	208.138	200.519	197.57	20.6772	21.7756	22.9002	-0.8195	-0.6865	-0.6724	2.9578	2.8278	3.1437	Kirmizi_Pistachio
50883	1067.81	429.041	155.465	0.932	254.531	0.9705	52429	0.7345	2.7597	0.5608	0.5933	0.0084	0.0031	0.352	0.9713	221.893	213.587	196.054	23.0479	24.8147	25.54	-0.8059	-0.697	-0.3234	2.9239	2.7894	2.4962	Kirmizi_Pistachio
88112	1407.21	489.605	232.597	0.8799	334.944	0.9714	90707	0.5915	2.1049	0.5591	0.6841	0.0056	0.0026	0.468	0.9851	209.522	196.601	193.469	19.0312	20.4993	22.263	-0.4339	-0.3433	-0.2745	3.1005	3.024	3.0793	Kirmizi_Pistachio
79725	1242.79	453.379	228.596	0.8636	318.605	0.974	81851	0.7603	1.9833	0.6486	0.7027	0.0057	0.0029	0.4938	0.9794	226.223	219.616	208.582	26.0732	27.1059	25.2532	-1.029	-0.9423	-0.8539	3.2054	2.9865	2.8117	Kirmizi_Pistachio
89986	2656.21	500.889	242.25	0.8753	338.487	0.8966	100360	0.657	2.0677	0.1603	0.6758	0.0056	0.0027	0.4567	0.9442	205.337	200.233	186.285	19.8133	21.8709	26.9815	-0.2188	0.1087	0.5451	3.1323	2.9597	3.1137	Kirmizi_Pistachio
54509	1931.41	419.637	187.089	0.8951	263.445	0.8264	65961	0.6536	2.243	0.1836	0.6278	0.0077	0.0034	0.3941	0.884	222.786	215.881	208.234	22.1622	24.7656	25.3825	-1.0448	-0.8219	-0.7237	3.4282	2.9955	2.713	Kirmizi_Pistachio
84336	2068.84	461.226	244.748	0.8476	327.689	0.9248	91189	0.7028	1.8845	0.2476	0.7105	0.0055	0.0029	0.5048	0.9512	220.624	210.476	193.42	24.0144	25.4068	27.475	-0.55	-0.4946	-0.4088	2.6016	2.4822	2.5818	Kirmizi_Pistachio
77803	2034.99	455.435	270.371	0.8047	314.741	0.7967	97652	0.6716	1.6845	0.2361	0.6911	0.0059	0.0035	0.4776	0.8045	217.363	209.837	192.139	24.2721	26.2044	27.6812	-0.4381	-0.3347	-0.1396	2.3746	2.3053	2.4131	Kirmizi_Pistachio
71107	1580.83	435.689	226.926	0.8537	300.892	0.8793	80868	0.6131	1.92	0.3576	0.6906	0.0061	0.0032	0.4769	0.9157	216.947	212.306	206.416	24.9548	26.8283	27.5856	-0.7173	-0.5827	-0.5845	2.4504	2.2987	2.3343	Kirmizi_Pistachio
71356	1107.54	418.998	224.837	0.8438	301.419	0.9542	74781	0.7676	1.8636	0.731	0.7194	0.0059	0.0032	0.5175	0.9644	235.994	233.399	217.938	26.7854	28.382	27.8433	-1.4386	-1.2808	-1.0371	4.0349	3.5347	3.0306	Kirmizi_Pistachio
69849	1349.35	411.409	227.171	0.8337	298.219	0.9322	74929	0.6868	1.811	0.4821	0.7249	0.0059	0.0033	0.5254	0.9516	203.769	194.858	199.279	21.6641	23.0822	24.2411	-0.0172	0.3236	0.1205	3.0199	3.1823	2.9309	Kirmizi_Pistachio
50850	2099.33	370.955	202.228	0.8383	254.449	0.8189	62092	0.6423	1.8343	0.145	0.6859	0.0073	0.004	0.4705	0.8631	194.56	185.115	182.901	19.2615	19.9151	18.1466	-0.3705	-0.3046	-0.2662	2.2051	2.1989	2.8921	Kirmizi_Pistachio
84652	1527.75	446.021	261.335	0.8104	328.302	0.9231	91707	0.7324	1.7067	0.4558	0.7361	0.0053	0.0031	0.5418	0.9247	220.939	214.071	207.325	27.4326	28.9048	30.4817	-0.6526	-0.5959	-0.3982	2.4711	2.3843	2.1223	Kirmizi_Pistachio
78892	1281.16	487.678	215.66	0.8969	316.936	0.9216	85606	0.6122	2.2613	0.604	0.6499	0.0062	0.0027	0.4224	0.9551	217.386	208.543	202.205	19.4641	20.4617	19.1417	-0.8404	-0.746	-0.4606	3.8177	3.5597	3.9486	Kirmizi_Pistachio
87623	1353.05	496.772	227.982	0.8885	334.014	0.9719	90156	0.7285	2.179	0.6015	0.6724	0.0057	0.0026	0.4521	0.9851	220.675	217.946	204.659	23.5865	24.7741	23.2905	-0.8104	-0.72	-0.5777	2.9985	2.8125	2.9493	Kirmizi_Pistachio
84792	1322.02	494.781	233.053	0.8821	328.574	0.8887	95411	0.6561	2.123	0.6097	0.6641	0.0058	0.0027	0.441	0.9363	216.247	208.829	195.339	24.9126	26.8367	27.5974	-0.4708	-0.3832	-0.3227	2.3363	2.2912	2.3662	Kirmizi_Pistachio
56395	1115.42	421.998	175.909	0.909	267.963	0.9352	60301	0.5526	2.399	0.5696	0.635	0.0075	0.0031	0.4032	0.9673	214.448	204.9	184.086	22.8731	25.406	27.4929	-0.415	-0.1884	-0.0848	2.51	2.4278	2.5542	Kirmizi_Pistachio
76829	1385.57	466.15	217.032	0.885	312.765	0.9364	82044	0.7544	2.1478	0.5029	0.671	0.0061	0.0028	0.4502	0.9669	215.368	215.413	207.544	23.8422	25.5313	24.2281	-0.8832	-0.8263	-0.6878	2.8445	2.6531	2.6749	Kirmizi_Pistachio
34095	1065.39	341.138	140.814	0.9108	208.353	0.8738	39017	0.5609	2.4226	0.3775	0.6108	0.01	0.0041	0.373	0.9037	196.859	179.857	177.437	17.2494	21.4533	22.7159	-0.2031	-0.0735	-0.9953	2.668	2.2293	4.7895	Kirmizi_Pistachio
76876	1314.59	424.482	235.864	0.8314	312.86	0.9653	79636	0.7384	1.7997	0.559	0.737	0.0055	0.0031	0.5432	0.9776	221.137	215.441	203.833	25	27.0089	25.9059	-0.7986	-0.6942	-0.5505	3.07	2.831	2.7084	Kirmizi_Pistachio
73946	1306.46	455.387	209.002	0.8885	306.84	0.9596	77061	0.744	2.1789	0.5444	0.6738	0.0062	0.0028	0.454	0.9892	213.672	203.832	184.669	23.9438	24.5343	26.4492	-0.515	-0.5096	-0.4587	2.6308	2.5818	2.5093	Kirmizi_Pistachio
76757	1188.41	464.014	214.068	0.8872	312.618	0.9786	78433	0.7225	2.1676	0.683	0.6737	0.006	0.0028	0.4539	0.9839	231.266	228.32	215.403	28.2022	29.6058	28.7433	-1.209	-1.0734	-0.8433	3.4281	3.0412	2.5801	Kirmizi_Pistachio
80537	1228.8	497.937	208.086	0.9085	320.223	0.9832	81910	0.7437	2.3929	0.6703	0.6431	0.0062	0.0026	0.4136	0.9897	226.593	221.641	211.101	22.2557	23.9972	23.5062	-1.0997	-0.9012	-0.6438	4.0504	3.4948	2.9343	Kirmizi_Pistachio
68098	1924.05	449.152	203.439	0.8915	294.457	0.9086	74951	0.5915	2.2078	0.2312	0.6556	0.0066	0.003	0.4298	0.9489	202.533	193.325	184.447	17.957	17.9042	15.545	-0.7866	-0.6788	-0.5951	3.4106	3.336	4.2727	Kirmizi_Pistachio
70844	1186.34	440.736	213.739	0.8745	300.335	0.9319	76019	0.7321	2.062	0.6325	0.6814	0.0062	0.003	0.4644	0.9575	216.746	206.395	187.1	28.5315	30.7936	29.3905	-0.4247	-0.3724	-0.3277	1.8538	1.875	2.0419	Kirmizi_Pistachio
68849	1441.26	451.046	205.255	0.8905	296.076	0.934	73716	0.6459	2.1975	0.4165	0.6564	0.0066	0.003	0.4309	0.9469	194.594	185.048	176.746	22.5868	23.4386	25.2662	0.5262	0.7342	1.1462	2.927	3.2501	4.2474	Kirmizi_Pistachio
37130	1085.46	370.598	136.555	0.9296	217.429	0.8889	41771	0.6703	2.7139	0.396	0.5867	0.01	0.0037	0.3442	0.9342	174.999	173.037	178.86	13.6484	14.3191	21.0026	-0.1237	0.087	-2.3486	2.6614	2.895	11.5339	Kirmizi_Pistachio
86116	1203.45	485.084	231.913	0.8783	331.129	0.9754	88287	0.6387	2.0917	0.7472	0.6826	0.0056	0.0027	0.466	0.9747	224.376	217.59	205.414	21.9873	22.8402	23.0402	-0.9371	-0.8148	-0.2644	3.6295	3.5683	2.8922	Kirmizi_Pistachio
70259	1097.69	412.414	218.997	0.8474	299.093	0.9792	71748	0.723	1.8832	0.7327	0.7252	0.0059	0.0031	0.526	0.9905	201.187	188.582	176.751	16.3176	16.6113	16.6454	-0.5602	-0.4805	-0.0712	3.1447	3.1055	4.1145	Kirmizi_Pistachio
69872	1139.55	451.767	201.026	0.8955	298.268	0.9681	72174	0.6665	2.2473	0.6762	0.6602	0.0065	0.0029	0.4359	0.9796	206.75	199.261	182.34	20.8613	21.7097	21.3527	-0.3161	-0.2081	-0.336	2.5143	2.3719	2.9198	Kirmizi_Pistachio
90398	1521.06	486.479	243.486	0.8657	339.261	0.9475	95405	0.649	1.998	0.491	0.6974	0.0054	0.0027	0.4863	0.9717	206.816	197.159	183.295	16.4931	18.633	17.5644	-0.8299	-0.7425	0.0084	3.7731	3.4249	4.3963	Kirmizi_Pistachio
73928	1194.53	448.481	216.44	0.8758	306.803	0.9473	78037	0.6687	2.0721	0.6511	0.6841	0.0061	0.0029	0.468	0.9697	195.227	185.45	175.27	15.5651	16.1006	17.7412	-0.4729	-0.1336	0.303	3.1904	3.3204	3.7982	Kirmizi_Pistachio
41636	967.392	367.029	155.382	0.906	230.245	0.9023	46144	0.6322	2.3621	0.5591	0.6273	0.0088	0.0037	0.3935	0.9296	203.638	193.88	188.892	20.7202	21.8764	21.5736	-0.4042	-0.1402	-0.1588	2.8642	2.7678	2.8697	Kirmizi_Pistachio
70612	1442.51	435.16	209.951	0.8759	299.843	0.9328	75701	0.6098	2.0727	0.4264	0.689	0.0062	0.003	0.4748	0.9841	207.481	193.042	166.387	22.689	21.6482	20.4099	-0.4649	-0.4746	-0.5862	2.0537	2.1072	2.5206	Kirmizi_Pistachio
76983	1207.36	469.605	215.141	0.8889	313.078	0.9572	80425	0.7767	2.1828	0.6636	0.6667	0.0061	0.0028	0.4445	0.9702	209.346	201.172	186.046	18.0064	19.2077	22.8263	-0.7382	-0.3641	0.1944	4.0764	3.6519	3.7316	Kirmizi_Pistachio
81715	1210.48	466.108	228.02	0.8722	322.557	0.9612	85016	0.7626	2.0442	0.7008	0.692	0.0057	0.0028	0.4789	0.9789	223.812	208.732	185.954	25.8814	25.6061	25.3934	-0.595	-0.5998	-0.3371	2.2359	2.2259	2.0187	Kirmizi_Pistachio
67548	1454.44	451.564	195.371	0.9016	293.266	0.9361	72158	0.699	2.3113	0.4013	0.6494	0.0067	0.0029	0.4218	0.9749	199.749	186.63	170.089	16.4529	17.0692	17.4318	-0.0847	-0.0213	0.0638	2.5883	2.7111	3.4109	Kirmizi_Pistachio
75438	2046.26	465.901	244.402	0.8514	309.92	0.8271	91208	0.6604	1.9063	0.2264	0.6652	0.0062	0.0032	0.4425	0.8435	216.467	204.138	180.743	24.3703	25.0157	24.2615	-0.3973	-0.31	-0.162	2.2803	2.2237	2.3312	Kirmizi_Pistachio
80031	1160.42	441.129	231.294	0.8515	319.216	0.9886	80954	0.7722	1.9072	0.7469	0.7236	0.0055	0.0029	0.5236	0.9987	213.728	200.141	175.203	19.3165	18.4644	16.8066	-0.3768	-0.3373	-0.3243	2.7404	2.6464	2.4428	Kirmizi_Pistachio
77970	1274.83	481.843	210.196	0.8998	315.079	0.9737	80075	0.7904	2.2923	0.6029	0.6539	0.0062	0.0027	0.4276	0.9802	225.803	213.791	189.936	24.6303	25.5745	25.9453	-0.794	-0.7695	-0.6402	2.5723	2.5345	2.4418	Kirmizi_Pistachio
83168	1869.4	462.268	242.885	0.8508	325.412	0.9215	90248	0.6922	1.9032	0.2991	0.7039	0.0056	0.0029	0.4955	0.9431	217.356	207.149	195.062	23.4601	25.6761	23.4782	-0.6993	-0.6217	-0.5945	2.5346	2.3537	2.4322	Kirmizi_Pistachio
54601	1348.17	421.283	182.442	0.9014	263.667	0.8768	62274	0.558	2.3091	0.3775	0.6259	0.0077	0.0033	0.3917	0.9045	194.849	181.179	166.167	15.411	16.1671	18.2462	-0.2044	-0.0904	0.1528	2.7345	3.1792	3.2125	Kirmizi_Pistachio
76833	1170.02	458.261	230.676	0.8641	312.773	0.9164	83838	0.7016	1.9866	0.7053	0.6825	0.006	0.003	0.4658	0.9254	227.255	221.425	206.422	25.7122	27.2321	26.7208	-0.7563	-0.6689	-0.6387	2.5792	2.5216	2.6015	Kirmizi_Pistachio
70140	1940.44	427.312	218.913	0.8588	298.839	0.9062	77399	0.6883	1.952	0.2341	0.6993	0.0061	0.0031	0.4891	0.9547	197.349	183.252	168.775	14.5168	15.3783	16.8616	-0.2249	-0.009	0.8313	3.0828	3.4606	5.1922	Kirmizi_Pistachio
89027	1297.7	488.361	233.45	0.8783	336.679	0.9796	90879	0.778	2.0919	0.6643	0.6894	0.0055	0.0026	0.4753	0.9943	229.189	219.436	204.063	25.1257	26.1702	27.2456	-0.8824	-0.8712	-0.7857	2.7727	2.8464	2.8703	Kirmizi_Pistachio
88204	1245.3	493.209	241.718	0.8717	335.119	0.9444	93394	0.75	2.0404	0.7147	0.6795	0.0056	0.0027	0.4617	0.942	236.168	228.991	210.483	22.7139	25.2674	24.7072	-1.3111	-1.0357	-0.8197	4.0779	3.5025	3.1419	Kirmizi_Pistachio
74757	1661.67	441.691	225.391	0.86	308.518	0.9359	79873	0.7255	1.9597	0.3402	0.6985	0.0059	0.003	0.4879	0.9561	233.089	225.695	211.268	24.8951	26.9613	28.1393	-1.1125	-0.8309	-0.5407	3.3481	2.845	2.2573	Kirmizi_Pistachio
83946	1262.8	514.346	213.575	0.9097	326.93	0.9593	87503	0.6375	2.4083	0.6615	0.6356	0.0061	0.0025	0.404	0.973	209.355	197.436	170.107	18.6369	19.8937	23.0931	-0.5588	-0.2937	0.0931	2.8518	2.6288	3.176	Kirmizi_Pistachio
71309	1091.94	426.274	219.262	0.8576	301.32	0.9762	73051	0.7122	1.9441	0.7515	0.7069	0.006	0.0031	0.4997	0.9714	221.7	212.595	196.581	26.4208	27.8697	28.2002	-0.579	-0.5138	-0.3949	2.2432	2.1491	2.1076	Kirmizi_Pistachio
32560	2553.48	427.759	156.208	0.9309	203.609	0.588	55371	0.4272	2.7384	0.0628	0.476	0.0131	0.0048	0.2266	0.6204	174.369	166.809	169.498	11.9674	14.3628	20.3153	0.4637	0.6049	0.9621	3.8425	3.4482	3.6204	Kirmizi_Pistachio
66051	1040.48	430.362	198.9	0.8868	289.998	0.9753	67725	0.7727	2.1637	0.7667	0.6738	0.0065	0.003	0.4541	0.9825	235.821	233.308	213.977	24.5651	26.8943	26.1081	-1.2208	-1.1612	-0.8655	3.4153	3.3185	2.5947	Kirmizi_Pistachio
89350	1868.08	511.695	230.407	0.8929	337.289	0.9391	95146	0.6749	2.2208	0.3217	0.6592	0.0057	0.0026	0.4345	0.9649	214.529	202.918	190.5	20.9896	21.8124	23.3336	-0.4079	-0.4056	-0.3395	2.7072	2.6632	2.7155	Kirmizi_Pistachio
70706	1257.79	440.592	209.996	0.8791	300.043	0.9509	74354	0.7228	2.0981	0.5616	0.681	0.0062	0.003	0.4638	0.973	204.518	189.232	176.186	19.0226	20.959	23.7012	0.1433	0.3562	0.5466	2.8348	3.1403	3.7153	Kirmizi_Pistachio
75277	1161.62	443.611	223.738	0.8635	309.589	0.9538	78925	0.7831	1.9827	0.701	0.6979	0.0059	0.003	0.487	0.9657	229.351	222.225	201.791	26.4655	30.0956	30.5994	-0.7697	-0.5747	-0.4654	2.453	2.173	2.1198	Kirmizi_Pistachio
63999	1785.68	431.337	205.082	0.8797	285.458	0.9044	70762	0.7025	2.1032	0.2522	0.6618	0.0067	0.0032	0.438	0.9212	210.828	199.833	178.746	22.7922	23.6895	23.0191	-0.3155	-0.3228	-0.2878	2.1645	2.1857	2.0342	Kirmizi_Pistachio
79995	1268.15	463.894	225.99	0.8733	319.144	0.9632	83050	0.7313	2.0527	0.6251	0.688	0.0058	0.0028	0.4733	0.9716	215.578	206.514	197.697	22.4542	25.4168	24.9126	-0.3259	-0.034	-0.0449	2.5196	2.4248	2.3525	Kirmizi_Pistachio
76905	1164.24	461.132	218.318	0.8808	312.919	0.9485	81084	0.6777	2.1122	0.713	0.6786	0.006	0.0028	0.4605	0.9726	223.414	213.212	193.946	25.9891	26.9133	24.2225	-0.7452	-0.6845	-0.2764	2.4566	2.4827	2.3891	Kirmizi_Pistachio
87848	1253.17	515.189	226.325	0.8983	334.442	0.9349	93961	0.7688	2.2763	0.703	0.6492	0.0059	0.0026	0.4214	0.9593	230.61	226.585	213.371	24.6618	27.185	26.2492	-0.9787	-0.9708	-0.6692	3.038	3.0438	2.4279	Kirmizi_Pistachio
80857	1263.7	474.596	222.381	0.8834	320.859	0.9427	85768	0.7306	2.1342	0.6363	0.6761	0.0059	0.0028	0.4571	0.9755	223.5	211.661	188.869	24.7772	25.9261	26.2505	-0.8141	-0.7798	-0.6802	2.4543	2.4712	2.5148	Kirmizi_Pistachio
89942	2181.83	479.673	256.437	0.8451	338.405	0.8696	103425	0.6664	1.8705	0.2374	0.7055	0.0053	0.0029	0.4977	0.931	212.085	196.999	182.083	23.0163	25.0103	27.3127	0.0287	0.1801	0.1683	2.4295	2.6043	3.3587	Kirmizi_Pistachio
74489	1542.88	458.99	213.134	0.8856	307.965	0.922	80788	0.6838	2.1535	0.3932	0.671	0.0062	0.0029	0.4502	0.9695	205.432	194.686	178.061	20.4179	21.5882	23.8548	-0.1856	0.0004	0.3776	2.7953	2.924	3.4395	Kirmizi_Pistachio
81712	2181.38	475.255	240.23	0.8628	322.551	0.8789	92973	0.6752	1.9783	0.2158	0.6787	0.0058	0.0029	0.4606	0.9113	214.879	205.499	183.52	20.9813	22.6622	22.0751	-0.7167	-0.6201	-0.6045	2.7907	2.6927	2.9113	Kirmizi_Pistachio
76237	1136.35	465.164	211.63	0.8905	311.557	0.9773	78007	0.7604	2.198	0.7419	0.6698	0.0061	0.0028	0.4486	0.986	222.826	219.314	194.189	22.4372	23.7111	21.9213	-0.9934	-0.8757	-0.4337	3.2045	3.0035	2.6796	Kirmizi_Pistachio
65418	1170.39	443.917	191.619	0.902	288.605	0.9627	67955	0.621	2.3167	0.6001	0.6501	0.0068	0.0029	0.4227	0.9792	207.273	195.053	179.956	17.7943	18.9364	21.2239	-0.4582	-0.0853	0.5355	3.1739	3.4008	3.7957	Kirmizi_Pistachio
76977	1253.11	453.246	221.623	0.8723	313.066	0.967	79600	0.7437	2.0451	0.616	0.6907	0.0059	0.0029	0.4771	0.9757	215.29	205.681	188.833	20.5377	22.2807	26.5932	-0.377	-0.1906	0.4047	2.6736	2.6258	2.691	Kirmizi_Pistachio
96255	1307.46	469.415	274.257	0.8116	350.079	0.9449	101866	0.7012	1.7116	0.7076	0.7458	0.0049	0.0028	0.5562	0.952	214.82	203.772	183.771	18.8985	20.617	24.8704	-0.2088	0.1796	0.412	3.2126	2.9865	2.9861	Kirmizi_Pistachio
63294	1160.16	417.822	197.188	0.8816	283.881	0.9587	66024	0.6847	2.1189	0.5909	0.6794	0.0066	0.0031	0.4616	0.9781	227.42	209.477	178.985	24.8172	23.9793	23.9415	-0.9518	-0.8789	-0.6583	2.7812	2.89	3.1978	Kirmizi_Pistachio
56531	1982.06	422.646	231.433	0.8368	268.286	0.762	74183	0.5634	1.8262	0.1808	0.6348	0.0075	0.0041	0.4029	0.7359	206.17	193.777	178.062	19.9319	20.4987	21.522	-0.0906	-0.0094	-0.0148	2.5525	2.6651	2.4478	Kirmizi_Pistachio
76679	1306.26	475.952	207.89	0.8996	312.459	0.9729	78816	0.7427	2.2894	0.5647	0.6565	0.0062	0.0027	0.431	0.9867	212.018	202.533	188.764	20.8024	22.7491	26.2083	-0.3324	-0.0991	-0.0171	2.6587	2.5258	2.4404	Kirmizi_Pistachio
70461	1421.31	416.021	222.579	0.8448	299.522	0.9467	74425	0.7306	1.8691	0.4383	0.72	0.0059	0.0032	0.5184	0.9689	206.678	192.789	175.256	16.7521	17.3063	17.9422	-0.3167	-0.2639	0.0863	3.4408	3.1092	3.0049	Kirmizi_Pistachio
87872	1373.19	504.392	225.44	0.8946	334.488	0.9629	91261	0.677	2.2374	0.5856	0.6632	0.0057	0.0026	0.4398	0.9839	206.202	195.946	180.893	17.0229	17.553	20.2129	-0.5604	-0.3764	0.172	3.6164	3.382	3.047	Kirmizi_Pistachio
70589	1126.48	443.926	207.702	0.8838	299.794	0.9765	72288	0.693	2.1373	0.699	0.6753	0.0063	0.0029	0.4561	0.9748	215.381	203.555	187.762	20.1451	21.901	27.0172	-0.509	-0.1005	0.3447	3.2117	2.891	2.4712	Kirmizi_Pistachio
79086	1834.31	456.273	235.596	0.8564	317.325	0.9353	84555	0.7253	1.9367	0.2954	0.6955	0.0058	0.003	0.4837	0.9367	213.521	205.329	190.484	22.9306	23.8954	23.5147	-0.5517	-0.5452	-0.5535	2.3589	2.3622	2.5067	Kirmizi_Pistachio
74301	2117.34	431.29	272.322	0.7754	307.576	0.7981	93098	0.5284	1.5837	0.2083	0.7132	0.0058	0.0037	0.5086	0.8055	212.611	199.186	181.987	23.7497	24.5939	24.8269	-0.3765	-0.3273	-0.0206	2.1226	2.1963	2.3696	Kirmizi_Pistachio
88447	1436.56	497.986	231.095	0.8858	335.58	0.9609	92045	0.7658	2.1549	0.5386	0.6739	0.0056	0.0026	0.4541	0.9786	226.716	213.927	194.539	23.3834	23.7858	24.205	-0.768	-0.7289	-0.5231	2.734	2.6014	2.4883	Kirmizi_Pistachio
68066	1108.72	443.106	206.493	0.8848	294.388	0.9173	74203	0.774	2.1459	0.6958	0.6644	0.0065	0.003	0.4414	0.9472	223.32	209.694	199.477	26.9078	28.2352	25.8337	-0.5723	-0.5592	-0.5014	2.1131	2.1606	2.1028	Kirmizi_Pistachio
79955	1277.65	472.25	218.881	0.8861	319.064	0.9632	83011	0.746	2.1576	0.6155	0.6756	0.0059	0.0027	0.4565	0.9849	229.145	218.955	205.984	26.6978	27.7695	29.2602	-0.872	-0.7981	-0.746	2.5018	2.4058	2.4537	Kirmizi_Pistachio
61992	1055.72	424.261	189.614	0.8946	280.946	0.9603	64553	0.7341	2.2375	0.6989	0.6622	0.0068	0.0031	0.4385	0.9812	221.958	204.276	188.686	24.8788	24.5548	22.1466	-0.7626	-0.7885	-0.6898	2.3667	2.4417	2.3502	Kirmizi_Pistachio
71945	1294.42	461.261	200.562	0.9005	302.66	0.9713	74068	0.7564	2.2998	0.5396	0.6562	0.0064	0.0028	0.4305	0.9902	223.018	209.996	182.461	21.8011	23.0183	22.4728	-0.7267	-0.6577	-0.4161	2.7693	2.6196	3.4153	Kirmizi_Pistachio
76282	1154.18	439.553	227.98	0.855	311.649	0.9673	78862	0.7054	1.928	0.7196	0.709	0.0058	0.003	0.5027	0.9692	209.869	194.837	168.595	16.6827	18.4739	25.1375	-0.2803	0.4408	1.2881	4.0294	4.2284	4.8558	Kirmizi_Pistachio
72151	2175.1	457.663	218.54	0.8786	303.093	0.8917	80914	0.7112	2.0942	0.1916	0.6623	0.0063	0.003	0.4386	0.9185	216.304	206.045	185.418	22.1703	23.9935	23.8778	-0.5581	-0.4588	-0.2107	2.5381	2.4341	2.8756	Kirmizi_Pistachio
77509	1936.82	462.618	222.676	0.8765	314.146	0.9254	83758	0.6979	2.0775	0.2596	0.6791	0.006	0.0029	0.4611	0.958	213.828	201.575	180.274	22.8938	23.5217	24.7408	-0.3335	-0.2754	-0.0707	2.1335	2.1911	2.2999	Kirmizi_Pistachio
76448	1974.26	415.274	280.665	0.737	311.988	0.8284	92280	0.6582	1.4796	0.2465	0.7513	0.0054	0.0037	0.5644	0.8351	220.882	210.368	180.008	23.575	23.6625	17.9058	-0.661	-0.7422	-0.3984	2.7225	2.8069	2.8987	Kirmizi_Pistachio
81998	2066.5	456.933	290.484	0.7719	323.115	0.8112	101081	0.649	1.573	0.2413	0.7071	0.0056	0.0035	0.5	0.7866	213.459	203.293	182.022	19.9829	20.4202	22.131	-0.325	-0.1288	0.3843	2.5475	2.5486	3.1483	Kirmizi_Pistachio
69080	1713.44	434.356	213.701	0.8706	296.573	0.9217	74947	0.6828	2.0325	0.2957	0.6828	0.0063	0.0031	0.4662	0.9476	218.871	205.617	188.176	22.1444	23.2575	25.2348	-0.5436	-0.4833	-0.4249	2.3356	2.2483	2.356	Kirmizi_Pistachio
58386	1088.68	423.737	187.313	0.897	272.652	0.9061	64440	0.6668	2.2622	0.619	0.6434	0.0073	0.0032	0.414	0.9366	195.752	182.529	178.916	14.0408	15.685	18.1809	-0.4815	-0.3453	0.3639	2.8824	2.8256	3.783	Kirmizi_Pistachio
83711	1903.67	480.359	256.263	0.8458	326.472	0.8505	98431	0.7089	1.8745	0.2903	0.6796	0.0057	0.0031	0.4619	0.8658	219.532	208.691	187.888	24.21	25.7157	25.735	-0.3267	-0.1776	0.2028	2.3101	2.2764	2.3999	Kirmizi_Pistachio
61033	1049.74	408.983	192.284	0.8826	278.764	0.9761	62530	0.7387	2.127	0.696	0.6816	0.0067	0.0032	0.4646	0.9882	210.347	202.62	195.631	16.0629	16.8102	17.6999	-0.7554	-0.5653	-0.1099	4.0228	3.7348	3.6987	Kirmizi_Pistachio
54660	1132.45	431.156	175.529	0.9134	263.809	0.8752	62455	0.6997	2.4563	0.5356	0.6119	0.0079	0.0032	0.3744	0.9196	197.723	186.431	180.109	16.5275	18.1347	20.1945	-0.1367	-0.0094	-0.1629	2.375	2.2518	2.4679	Kirmizi_Pistachio
76110	1721.33	469.634	224.664	0.8782	311.298	0.8485	89701	0.6471	2.0904	0.3228	0.6629	0.0062	0.003	0.4394	0.9185	210.004	199.846	175.324	21.386	23.5142	26.2654	-0.3902	-0.2152	-0.0441	2.2029	2.1869	2.6074	Kirmizi_Pistachio
48825	1095.23	369.885	172.972	0.8839	249.331	0.9236	52865	0.6802	2.1384	0.5115	0.6741	0.0076	0.0035	0.4544	0.9717	200.114	186.911	170.538	16.4704	17.8744	20.7701	-0.2128	-0.1973	-0.1444	2.3221	2.2656	2.808	Kirmizi_Pistachio
60052	1109.89	406.954	193.476	0.8798	276.515	0.9358	64170	0.7233	2.1034	0.6126	0.6795	0.0068	0.0032	0.4617	0.9711	207.245	198.873	182.097	17.8451	19.4392	21.6649	-0.572	-0.4595	-0.3068	2.708	2.5866	2.8547	Kirmizi_Pistachio
83068	1194.95	472.616	232.176	0.871	325.216	0.9297	89346	0.7602	2.0356	0.731	0.6881	0.0057	0.0028	0.4735	0.9639	231.89	222.161	202.942	20.0475	21.2865	23.0154	-1.3647	-1.1455	-0.5527	4.5688	4.1391	3.2822	Kirmizi_Pistachio
88422	1228.65	491.782	232.719	0.8809	335.533	0.9805	90184	0.7828	2.1132	0.7361	0.6823	0.0056	0.0026	0.4655	0.9837	239.151	233.757	219.626	21.6311	21.6993	20.2555	-1.8168	-1.5687	-0.9856	6.1007	5.4921	4.3433	Kirmizi_Pistachio
53305	1360.28	391.967	181.4	0.8865	260.519	0.9008	59173	0.6715	2.1608	0.362	0.6646	0.0074	0.0034	0.4418	0.9545	214.183	205.203	192.493	24.0273	26.857	30.431	-0.344	-0.2806	-0.2475	2.074	2.0719	2.5855	Kirmizi_Pistachio
65471	1888.23	401.476	215.796	0.8433	288.722	0.91	71950	0.7343	1.8604	0.2308	0.7192	0.0061	0.0033	0.5172	0.9622	213.529	205.679	191.929	22.5034	24.9605	26.3281	-0.3929	-0.2714	-0.1276	2.3264	2.2211	2.472	Kirmizi_Pistachio
73525	1146.69	433.863	225.662	0.8541	305.966	0.9371	78462	0.7119	1.9226	0.7027	0.7052	0.0059	0.0031	0.4973	0.9562	229.931	223.601	207.909	26.4482	27.3897	26.9568	-1.0078	-0.8639	-0.6933	2.9633	2.7504	2.6347	Kirmizi_Pistachio
73305	1286.46	439.938	214.288	0.8734	305.507	0.9681	75722	0.759	2.053	0.5566	0.6944	0.006	0.0029	0.4822	0.99	207.832	198.877	182.176	18.4966	19.9685	23.1208	-0.1008	0.067	0.4616	2.8715	2.8529	3.3896	Kirmizi_Pistachio
75858	2226.13	457.222	231.945	0.8618	310.782	0.8915	85093	0.5994	1.9713	0.1924	0.6797	0.006	0.0031	0.462	0.9108	221.21	209.876	201.097	26.0143	29.2178	27.5004	-0.5317	-0.4747	-0.4452	2.0319	2.0091	2.1383	Kirmizi_Pistachio
83252	2418.31	507.147	229.104	0.8921	325.576	0.8694	95756	0.7075	2.2136	0.1789	0.642	0.0061	0.0028	0.4121	0.9123	197.791	187.491	186.761	14.7681	15.5729	15.5086	-0.2883	-0.2344	0.0572	3.0944	3.2253	3.8397	Kirmizi_Pistachio
71308	2007.63	423.699	245.656	0.8148	301.317	0.8691	82046	0.6809	1.7248	0.2223	0.7112	0.0059	0.0034	0.5057	0.8723	230.028	224.703	202.854	22.3513	24.7459	24.6009	-0.8675	-0.7124	-0.5226	3.0767	2.7615	2.6677	Kirmizi_Pistachio
75673	1377.97	434.47	237.145	0.8379	310.403	0.913	82882	0.7315	1.8321	0.5008	0.7144	0.0057	0.0031	0.5104	0.9351	226.959	218.319	197.889	28.0787	29.5608	32.144	-0.7475	-0.5636	-0.9786	2.3597	2.1976	3.7603	Kirmizi_Pistachio
74356	2528.8	474.089	229.449	0.8751	307.69	0.8248	90148	0.6428	2.0662	0.1461	0.649	0.0064	0.0031	0.4212	0.8703	223.379	210.257	199.743	25.0078	26.294	25.2864	-0.8346	-0.8016	-0.7786	2.7502	2.6866	2.6886	Kirmizi_Pistachio
58786	2212.36	432.685	217.287	0.8648	273.585	0.7627	77076	0.602	1.9913	0.1509	0.6323	0.0074	0.0037	0.3998	0.7961	220.928	209.377	183.819	23.4671	24.5263	24.9476	-0.7487	-0.6691	-0.6572	2.424	2.3062	2.5991	Kirmizi_Pistachio
81524	1336.55	454.942	232.032	0.8602	322.179	0.9618	84760	0.7146	1.9607	0.5735	0.7082	0.0056	0.0028	0.5015	0.9833	218.329	205.325	178.64	23.7557	23.4121	21.0957	-0.5349	-0.477	-0.1782	2.4237	2.5274	2.9724	Kirmizi_Pistachio
67458	1792.79	418.483	228.18	0.8383	293.07	0.8805	76613	0.6471	1.834	0.2637	0.7003	0.0062	0.0034	0.4904	0.8995	218.133	206.304	183.419	25.7193	26.8345	27.5743	-0.4083	-0.3307	-0.1323	2.0884	2.0293	1.9776	Kirmizi_Pistachio
84628	1392.06	479.971	230.786	0.8768	328.256	0.9375	90268	0.7362	2.0797	0.5488	0.6839	0.0057	0.0027	0.4677	0.9727	225.067	214.88	204.164	25.1009	25.9879	24.7778	-0.9541	-0.9644	-0.943	2.9323	2.9022	3.0841	Kirmizi_Pistachio
81530	1987.78	463.721	236.588	0.8601	322.191	0.9201	88606	0.7304	1.96	0.2593	0.6948	0.0057	0.0029	0.4827	0.9462	207.636	195.711	193.194	20.5901	20.7624	21.9486	-0.6415	-0.62	-0.4957	2.2334	2.2835	2.1215	Kirmizi_Pistachio
90180	1188.21	452.911	254.342	0.8274	338.852	0.9865	91412	0.7636	1.7807	0.8027	0.7482	0.005	0.0028	0.5598	0.9968	233.283	219.548	196.202	22.7717	24.1644	24.2921	-1.311	-0.8711	-0.6154	4.0047	3.3723	2.9771	Kirmizi_Pistachio
67223	1359.09	418.615	217.613	0.8543	292.559	0.9303	72259	0.6915	1.9237	0.4573	0.6989	0.0062	0.0032	0.4884	0.9396	203.408	191.949	188.374	23.337	25.9915	27.2478	0.0348	0.0905	0.2135	2.0163	2.048	2.3236	Kirmizi_Pistachio
96425	1347.23	513.57	243.337	0.8806	350.389	0.9759	98802	0.7015	2.1105	0.6676	0.6823	0.0053	0.0025	0.4655	0.9824	209.333	194.888	172.941	21.5137	22.2644	24.0633	-0.0185	0.1388	0.2582	2.5999	2.5058	2.4209	Kirmizi_Pistachio
84292	1238.2	428.843	255.975	0.8023	327.603	0.9621	87609	0.7599	1.6753	0.6909	0.7639	0.0051	0.003	0.5836	0.9777	227.368	218.776	199.824	25.1169	26.2224	24.9024	-0.9282	-0.8585	-0.581	2.9008	2.764	2.4681	Kirmizi_Pistachio
53286	1253.35	403.966	176.842	0.8991	260.472	0.8709	61184	0.634	2.2843	0.4263	0.6448	0.0076	0.0033	0.4158	0.9497	182.274	167.56	164.768	12.7529	11.9854	16.4219	0.4333	0.4571	0.7297	2.8249	3.4387	4.5499	Kirmizi_Pistachio
74424	1205.58	445.501	227.316	0.86	307.83	0.8941	83235	0.6622	1.9598	0.6435	0.691	0.006	0.0031	0.4774	0.9357	217.321	205.227	190.445	22.7241	23.4126	22.68	-0.6079	-0.58	-0.5661	2.4052	2.3623	2.6305	Kirmizi_Pistachio
70689	2024.6	460.432	208.272	0.8918	300.007	0.897	78808	0.7161	2.2107	0.2167	0.6516	0.0065	0.0029	0.4246	0.9386	214.945	201.978	185.43	24.1491	24.6727	23.1976	-0.5508	-0.6003	-0.582	2.25	2.2823	2.4909	Kirmizi_Pistachio
81460	2009.21	470.243	252.989	0.8429	322.053	0.8651	94167	0.6763	1.8587	0.2536	0.6849	0.0058	0.0031	0.469	0.8718	226.216	214.626	199.79	24.9311	26.5407	25.094	-0.8313	-0.6826	-0.6774	2.7859	2.5659	2.7287	Kirmizi_Pistachio
77441	2748.86	428.376	274.781	0.7672	314.008	0.8114	95443	0.6529	1.559	0.1288	0.733	0.0055	0.0035	0.5373	0.8377	212.95	197.04	180.707	27.1654	29.3236	27.4891	-0.1094	-0.1772	-0.2124	1.6624	1.6901	1.7913	Kirmizi_Pistachio
91081	1296.7	513.067	231.257	0.8927	340.541	0.9708	93820	0.7511	2.2186	0.6807	0.6637	0.0056	0.0025	0.4405	0.9774	235.047	226.754	208.12	24.1066	25.6907	27.2896	-1.3134	-1.0379	-0.6869	3.9028	3.348	2.782	Kirmizi_Pistachio
75635	1561.04	446.453	229.405	0.8579	310.325	0.8969	84327	0.5822	1.9461	0.39	0.6951	0.0059	0.003	0.4831	0.9403	209.311	194.303	179.657	19.1689	21.6463	22.2754	-0.0009	0.2295	0.997	3.0843	3.4209	5.0347	Kirmizi_Pistachio
73119	1161.65	459.802	207.723	0.8921	305.12	0.965	75774	0.7663	2.2135	0.6809	0.6636	0.0063	0.0028	0.4403	0.9747	215.482	196.926	163.369	19.5327	17.8062	18.5735	-0.2297	-0.2228	-0.6006	2.9848	3.4124	4.4131	Kirmizi_Pistachio
65537	1739	422.437	221.336	0.8517	288.867	0.8709	75252	0.6886	1.9086	0.2723	0.6838	0.0064	0.0034	0.4676	0.8924	232.105	220.423	196.605	24.5468	25.2817	24.8571	-1.1385	-1.0625	-1.0954	3.2719	3.1632	3.4909	Kirmizi_Pistachio
86114	1275.5	482.045	230.258	0.8785	331.125	0.9709	88698	0.6016	2.0935	0.6652	0.6869	0.0056	0.0027	0.4719	0.9878	224.979	212.712	190.564	20.7243	20.81	20.7822	-1.2206	-1.0729	-0.7999	3.9812	3.6748	3.5958	Kirmizi_Pistachio
43934	1850.21	361.904	174.282	0.8764	236.513	0.8064	54479	0.6403	2.0765	0.1613	0.6535	0.0082	0.004	0.4271	0.8869	207.73	197.931	176.813	20.9992	22.3645	23.4525	-0.3757	-0.2801	-0.1163	2.2125	2.1976	2.3385	Kirmizi_Pistachio
73362	1100.29	428.781	221.174	0.8567	305.626	0.9843	74530	0.7755	1.9387	0.7615	0.7128	0.0058	0.003	0.5081	0.9849	230.257	220.843	200.49	25.5687	26.6907	27.1628	-0.9367	-0.7269	-0.5697	2.9105	2.5053	2.1315	Kirmizi_Pistachio
85526	1333.93	479.307	233.009	0.8739	329.993	0.9506	89969	0.7304	2.057	0.604	0.6885	0.0056	0.0027	0.474	0.975	206.287	191.269	173.764	17.2236	18.2869	21.2869	-0.5059	-0.3213	0.2831	3.1011	3.1424	3.7766	Kirmizi_Pistachio
63121	1589.68	447.866	192.508	0.9029	283.493	0.8905	70880	0.6375	2.3265	0.3139	0.633	0.0071	0.003	0.4007	0.9322	192.597	179.798	171.571	16.9747	18.3243	20.3175	0.9019	1.1289	1.2504	4.902	5.5951	5.6002	Kirmizi_Pistachio
81333	1221.35	506.233	214.291	0.906	321.802	0.936	86896	0.6167	2.3624	0.6852	0.6357	0.0062	0.0026	0.4041	0.9546	213.512	198.464	190.283	18.1364	20.3394	21.4102	-0.3745	-0.2428	0.2408	2.9622	3.0358	3.0798	Kirmizi_Pistachio
55508	1029.84	396.271	191.793	0.8751	265.848	0.9104	60968	0.7225	2.0661	0.6577	0.6709	0.0071	0.0035	0.4501	0.9299	233.892	231.53	217.418	25.1449	26.8659	28.6888	-1.3631	-1.237	-0.8553	4.0304	3.6527	2.9693	Kirmizi_Pistachio
70579	1399.67	432.605	211.75	0.872	299.773	0.9514	74186	0.718	2.043	0.4527	0.6929	0.0061	0.003	0.4802	0.981	215.645	205.229	185.853	19.9158	22.4537	26.1605	-0.4769	-0.166	0.0642	2.8314	2.6097	2.5587	Kirmizi_Pistachio
67625	1157.95	413.708	216.298	0.8524	293.433	0.9468	71427	0.681	1.9127	0.6338	0.7093	0.0061	0.0032	0.5031	0.9622	213.277	200.798	184.348	18.6103	20.2492	20.3306	-0.7021	-0.4634	0.4542	3.4065	3.5935	5.1117	Kirmizi_Pistachio
75330	1214.09	436.848	222.009	0.8612	309.699	0.9702	77640	0.7731	1.9677	0.6422	0.7089	0.0058	0.0029	0.5026	0.989	223.556	211.677	197.162	22.0083	22.814	24.6231	-1.076	-0.8875	-0.7006	3.3638	3.2477	3.0436	Kirmizi_Pistachio
76164	1123.15	457.522	214.146	0.8837	311.408	0.9788	77811	0.7506	2.1365	0.7587	0.6806	0.006	0.0028	0.4633	0.9898	236.844	231.586	200.966	22.7398	23.7402	21.6556	-1.5677	-1.1933	-0.7236	5.06	3.9414	3.3049	Kirmizi_Pistachio
65570	2071.45	418.026	217.146	0.8545	288.94	0.8976	73054	0.5945	1.9251	0.192	0.6912	0.0064	0.0033	0.4778	0.9197	225.399	216.985	195.721	25.2646	28.5443	28.0747	-0.6584	-0.6223	-0.6653	2.3546	2.3268	2.4757	Kirmizi_Pistachio
64771	1478.69	446.959	190.695	0.9044	287.174	0.9285	69756	0.7067	2.3438	0.3723	0.6425	0.0069	0.0029	0.4128	0.9676	195.034	187.321	178.221	16.2629	17.667	19.7592	0.3779	0.6626	1.0049	4.3247	4.6252	5.221	Kirmizi_Pistachio
71771	1425.09	445.004	211.999	0.8792	302.294	0.9294	77220	0.745	2.0991	0.4441	0.6793	0.0062	0.003	0.4615	0.9686	202.018	192.524	181.145	20.3919	23.3679	26.7196	0.3379	0.6221	0.9958	2.8729	3.1256	3.7007	Kirmizi_Pistachio
84232	1528.72	484.755	229.025	0.8814	327.487	0.9417	89443	0.615	2.1166	0.4529	0.6756	0.0058	0.0027	0.4564	0.966	211.517	204.406	193.427	19.7833	20.7514	20.5681	-0.8914	-0.7439	-0.2897	3.095	2.963	2.8326	Kirmizi_Pistachio
75031	1159.26	456.257	222.02	0.8736	309.083	0.9331	80407	0.6655	2.055	0.7016	0.6774	0.0061	0.003	0.4589	0.9431	236.055	230.433	216.415	24.3314	27.1959	25.7069	-1.26	-1.1121	-0.943	3.6206	3.2907	2.8578	Kirmizi_Pistachio
71407	1176.47	443.322	211.608	0.8787	301.526	0.9437	75664	0.7116	2.095	0.6483	0.6802	0.0062	0.003	0.4626	0.9692	215.818	201.597	189.524	27.5949	30.2014	26.0846	-0.376	-0.3864	-0.3745	1.7809	1.778	2.2485	Kirmizi_Pistachio
75516	1731.48	411.735	245.762	0.8023	310.081	0.9148	82546	0.7169	1.6753	0.3165	0.7531	0.0055	0.0033	0.5672	0.9502	226.906	219.354	200.85	25.8412	28.7529	31.9152	-0.7759	-0.6548	-0.432	2.6256	2.4217	2.2938	Kirmizi_Pistachio
84529	1169.58	476.196	228.582	0.8773	328.063	0.9888	85490	0.787	2.0833	0.7765	0.6889	0.0056	0.0027	0.4746	0.9888	220.703	212.822	197.225	17.3908	18.7416	19.9761	-0.7525	-0.4371	-0.1963	3.4796	2.9409	3.2232	Kirmizi_Pistachio
62238	1814.61	405.715	205.612	0.8621	281.503	0.8895	69971	0.6034	1.9732	0.2375	0.6938	0.0065	0.0033	0.4814	0.9499	217.288	207.411	186.121	20.5431	23.3355	25.9713	-0.6682	-0.484	-0.2163	2.9807	2.7377	2.6745	Kirmizi_Pistachio
74244	2004.19	431.875	249.385	0.8164	307.458	0.8425	88119	0.657	1.7318	0.2323	0.7119	0.0058	0.0034	0.5068	0.8777	209.475	198.363	180.117	21.3188	21.3771	19.5887	-0.517	-0.4716	-0.3797	2.2604	2.2957	2.6053	Kirmizi_Pistachio
72577	1765.83	503.304	194.476	0.9223	303.987	0.8879	81744	0.7244	2.588	0.2925	0.604	0.0069	0.0027	0.3648	0.9441	199.641	189.603	178.048	20.7816	22.7046	25.1262	0.4565	0.5735	0.6817	2.9679	2.9633	3.1636	Kirmizi_Pistachio
65565	1115.94	438.731	197.189	0.8933	288.929	0.9378	69915	0.7139	2.2249	0.6616	0.6586	0.0067	0.003	0.4337	0.9649	208.833	194.689	179.225	19.9426	21.5134	21.3844	-0.5733	-0.5783	-0.4827	2.3233	2.389	2.3183	Kirmizi_Pistachio
65994	2394.1	437.403	213.106	0.8733	289.873	0.8685	75987	0.6656	2.0525	0.1447	0.6627	0.0066	0.0032	0.4392	0.9014	208.817	198.158	175.593	17.541	18.412	25.4907	-0.4654	-0.2051	-0.0339	3.1337	3.2606	4.2195	Kirmizi_Pistachio
63050	1649.81	394.567	230.528	0.8116	283.333	0.8815	71526	0.6735	1.7116	0.2911	0.7181	0.0063	0.0037	0.5156	0.8826	221.294	209.378	188.724	22.667	22.4915	21.1201	-0.5594	-0.5715	-0.5165	2.4584	2.4344	2.3364	Kirmizi_Pistachio
78830	1525.91	418.783	243.061	0.8143	316.811	0.9528	82738	0.7454	1.723	0.4254	0.7565	0.0053	0.0031	0.5723	0.986	222.304	210.937	193.899	24.1685	25.5375	27.7864	-0.4374	-0.2288	-0.0109	2.3468	2.1141	1.9927	Kirmizi_Pistachio
67873	1328.66	444.017	200.449	0.8923	293.97	0.9549	71081	0.6245	2.2151	0.4831	0.6621	0.0065	0.003	0.4383	0.971	217.8	204.601	186.437	19.7816	22.5845	26.9732	-0.7898	-0.4358	0.0842	2.9835	2.8319	3.0042	Kirmizi_Pistachio
60519	1036.61	417.95	187.728	0.8934	277.588	0.9837	61520	0.746	2.2264	0.7077	0.6642	0.0069	0.0031	0.4411	0.9821	220.916	205.926	188.223	23.1751	22.7507	20.7895	-0.6282	-0.6137	-0.4656	2.7665	2.6403	2.5308	Kirmizi_Pistachio
69417	1199.81	442.472	202.423	0.8892	297.295	0.9777	70998	0.7603	2.1859	0.606	0.6719	0.0064	0.0029	0.4514	0.9868	212.378	206.199	186.297	20.2861	21.2453	21.615	-0.8696	-0.6581	-0.4311	3.022	2.8803	2.9439	Kirmizi_Pistachio
85660	1188.32	474.812	234.922	0.869	330.251	0.9873	86763	0.753	2.0211	0.7623	0.6955	0.0055	0.0027	0.4838	0.9778	217.51	208.156	203.108	16.091	15.8807	14.3014	-1.3304	-1.0241	-0.707	5.3295	4.5537	4.113	Kirmizi_Pistachio
64046	1431.36	409.903	207.071	0.863	285.562	0.9182	69755	0.6562	1.9795	0.3928	0.6967	0.0064	0.0032	0.4853	0.9607	213.908	203.091	190.737	26.6013	28.7347	30.2821	-0.241	-0.0754	-0.0136	2.0976	1.9812	2.0894	Kirmizi_Pistachio
72064	1151.36	436.224	213.054	0.8726	302.91	0.9781	73679	0.767	2.0475	0.6831	0.6944	0.0061	0.003	0.4822	0.9873	230.616	219.789	194.488	26.2604	26.9255	26.8914	-1.0975	-0.9313	-0.6887	3.1229	2.8681	2.5008	Kirmizi_Pistachio
51626	1030.54	381.834	178.018	0.8847	256.383	0.9589	53839	0.6754	2.1449	0.6109	0.6715	0.0074	0.0034	0.4508	0.967	189.351	179.18	167.027	16.5976	17.5232	16.7867	0.3167	0.3644	0.454	2.6078	2.6842	3.064	Kirmizi_Pistachio
77603	1137.22	418.159	245.092	0.8102	314.336	0.981	79102	0.6393	1.7061	0.754	0.7517	0.0054	0.0032	0.5651	0.9641	228.032	207.724	173.785	22.0399	20.2491	20.273	-0.8986	-0.7793	-0.6731	3.1993	3.1707	3.1381	Kirmizi_Pistachio
81733	1291.54	467.218	226.705	0.8744	322.592	0.949	86121	0.6764	2.0609	0.6157	0.6905	0.0057	0.0028	0.4767	0.9825	218.354	206.053	190.631	21.7015	23.132	26.8097	-0.3861	-0.0893	0.3637	2.7575	2.7271	2.9306	Kirmizi_Pistachio
71560	1225.52	426.249	218.788	0.8582	301.849	0.9492	75387	0.7279	1.9482	0.5987	0.7082	0.006	0.0031	0.5015	0.977	223.479	208.72	189.61	28.6395	30.5463	30.6506	-0.506	-0.4674	-0.4186	1.9425	1.9466	2.1842	Kirmizi_Pistachio
75944	1206.29	409.614	239.256	0.8117	310.958	0.9749	77897	0.7338	1.712	0.6558	0.7591	0.0054	0.0032	0.5763	0.9867	213.482	198.02	169.268	19.2766	21.4277	24.4482	-0.7834	-0.3705	-0.0922	3.1107	2.5387	3.083	Kirmizi_Pistachio
53898	999.22	354.253	202.128	0.8212	261.964	0.9235	58360	0.5984	1.7526	0.6784	0.7395	0.0066	0.0038	0.5468	0.9584	200.248	192.37	167.993	19.8056	20.3085	21.7522	-0.2097	-0.1301	-0.0744	2.1575	2.2835	3.1814	Kirmizi_Pistachio
58747	1323.02	462.171	166.284	0.933	273.494	0.9328	62980	0.5789	2.7794	0.4218	0.5918	0.0079	0.0028	0.3502	0.9733	187.082	177.282	169.646	15.8245	16.5916	18.7724	0.4735	0.6156	0.8541	3.2485	3.5511	4.2605	Kirmizi_Pistachio
74993	1128.31	448.254	215.265	0.8771	309.005	0.9805	76486	0.761	2.0823	0.7402	0.6894	0.006	0.0029	0.4752	0.9895	227.985	220.174	206.989	24.1779	25.4769	24.6455	-0.9311	-0.7197	-0.5054	3.0589	2.8255	2.6174	Kirmizi_Pistachio
67543	1130.66	451.8	193.119	0.904	293.255	0.9568	70591	0.7381	2.3395	0.6639	0.6491	0.0067	0.0029	0.4213	0.9856	226.632	221.015	215.034	21.2745	23.2135	22.626	-0.7663	-0.5844	-0.4437	3.4043	3.044	3.1337	Kirmizi_Pistachio
77892	1448.81	436.295	243.087	0.8304	314.921	0.9088	85709	0.7049	1.7948	0.4663	0.7218	0.0056	0.0031	0.521	0.9351	219.57	208.494	181.811	22.1053	23.1819	27.9284	-0.8074	-0.705	-0.6675	2.6738	2.5193	2.9061	Kirmizi_Pistachio
73389	1098.17	385.104	244.8	0.772	305.683	0.9828	74673	0.7478	1.5731	0.7647	0.7938	0.0052	0.0033	0.6301	0.9912	207.006	193.3	183.569	19.2741	20.5261	19.8361	-0.1217	0.0158	0.1463	2.1976	2.1013	2.2682	Kirmizi_Pistachio
67270	1084.45	425.197	204.993	0.8761	292.662	0.9711	69272	0.7504	2.0742	0.7188	0.6883	0.0063	0.003	0.4738	0.9827	232.05	225.308	196.719	24.1879	26.4544	27.2019	-0.8846	-0.6758	-0.4558	2.902	2.5082	2.3304	Kirmizi_Pistachio
67479	1129.5	408.627	214.112	0.8517	293.116	0.969	69635	0.7443	1.9085	0.6647	0.7173	0.0061	0.0032	0.5145	0.982	204.569	191.667	180.489	16.9842	17.6319	20.6258	-0.2247	0.0578	0.6074	3.4315	3.7853	4.9397	Kirmizi_Pistachio
87728	1916.08	466.146	267.391	0.8191	334.214	0.8576	102293	0.6723	1.7433	0.3003	0.717	0.0053	0.003	0.514	0.8961	228.836	218.64	199.945	24.034	26.61	27.8719	-0.9135	-0.6838	-0.2653	3.014	2.6819	2.2809	Kirmizi_Pistachio
65887	1226.87	438.008	201.465	0.8879	289.638	0.9184	71743	0.6786	2.1741	0.5501	0.6613	0.0066	0.0031	0.4373	0.9507	220.706	211.592	198.732	26.2747	29.2439	29.9469	-0.4494	-0.2799	-0.2319	2.1553	2.0517	2.1428	Kirmizi_Pistachio
78148	1867.46	438.001	235.849	0.8426	315.438	0.9302	84013	0.735	1.8571	0.2816	0.7202	0.0056	0.003	0.5187	0.9632	216.465	206.429	189.87	22.0271	23.5733	27.9102	-0.5733	-0.3666	0.0287	2.7652	2.6839	2.5873	Kirmizi_Pistachio
71972	1093.48	437	217.793	0.867	302.717	0.9517	75625	0.7441	2.0065	0.7564	0.6927	0.0061	0.003	0.4799	0.9628	237.1	219.781	183.326	23.4977	24.9506	22.1765	-1.2387	-0.9797	-0.8706	3.4377	2.9819	2.7116	Kirmizi_Pistachio
66182	1127.67	407.353	214.076	0.8508	290.285	0.9645	68621	0.7303	1.9028	0.654	0.7126	0.0062	0.0032	0.5078	0.9663	201.104	188.855	168.689	17.7471	18.0426	19.5635	-0.0259	0.2765	0.7018	2.9388	3.0634	3.6795	Kirmizi_Pistachio
80428	1528.3	464.194	224.578	0.8752	320.006	0.9721	82734	0.7409	2.067	0.4327	0.6894	0.0058	0.0028	0.4752	0.9823	237.428	231.704	212.328	24.0559	26.0557	24.571	-1.4075	-1.2004	-0.9695	3.9084	3.4594	3.1518	Kirmizi_Pistachio
67549	1263.19	431.183	213.61	0.8687	293.268	0.9117	74089	0.6853	2.0185	0.532	0.6801	0.0064	0.0032	0.4626	0.9338	220.303	208.6	193.424	25.3414	27.7434	27.5824	-0.3506	-0.2608	-0.2477	2.0644	2.0326	1.9089	Kirmizi_Pistachio
82580	1201.87	471.642	226.624	0.877	324.259	0.9738	84804	0.7367	2.0812	0.7184	0.6875	0.0057	0.0027	0.4727	0.9837	209.141	202.78	194.078	18.8505	20.197	20.2116	-0.244	-0.0682	0.1629	2.9671	2.7892	2.8766	Kirmizi_Pistachio
78827	2755.05	498.708	233.764	0.8833	316.805	0.8542	92287	0.6831	2.1334	0.1305	0.6353	0.0063	0.003	0.4035	0.8609	217.907	210.801	194.619	27.2178	29.9667	29.2481	-0.3473	-0.1923	0.0441	2.1639	2.0647	2.177	Kirmizi_Pistachio
73197	1383.82	432.291	226.51	0.8517	305.282	0.9269	78972	0.6413	1.9085	0.4803	0.7062	0.0059	0.0031	0.4987	0.9518	210.661	198.404	185.165	18.2077	19.8321	17.5922	-0.4113	-0.497	0.0824	2.7812	2.9204	3.0175	Kirmizi_Pistachio
67486	1254.58	435.869	204.178	0.8835	293.131	0.9468	71280	0.7509	2.1348	0.5388	0.6725	0.0065	0.003	0.4523	0.9655	230.089	223.528	198.786	27.3573	31.168	30.7225	-0.8937	-0.761	-0.5975	2.5808	2.3417	2.1482	Kirmizi_Pistachio
67297	1135.11	422.055	206.534	0.8721	292.72	0.9607	70053	0.7059	2.0435	0.6563	0.6936	0.0063	0.0031	0.481	0.983	219.751	206.492	202.803	24.0223	26.1297	25.6501	-0.3112	-0.1988	-0.2586	2.3836	2.3302	2.522	Kirmizi_Pistachio
82148	1233.54	485.03	220.604	0.8906	323.41	0.9609	85489	0.7492	2.1986	0.6784	0.6668	0.0059	0.0027	0.4446	0.9775	221.197	212.551	206.484	24.3063	25.2057	24.0368	-0.7362	-0.6455	-0.4596	2.6262	2.5164	2.3544	Kirmizi_Pistachio
48770	2225.43	375.473	199.815	0.8466	249.19	0.7681	63495	0.5746	1.8791	0.1237	0.6637	0.0077	0.0041	0.4405	0.8277	193.021	181.934	170.938	17.0138	17.8291	19.9975	0.0399	0.1107	0.0953	2.4627	2.6089	2.9427	Kirmizi_Pistachio
70106	1115.47	432.642	217.062	0.865	298.767	0.9455	74144	0.7325	1.9932	0.708	0.6906	0.0062	0.0031	0.4769	0.9505	226.676	221.766	204.788	25.1163	26.6586	26.3471	-0.7096	-0.5524	-0.0849	2.6356	2.4995	2.2836	Kirmizi_Pistachio
60694	2086.55	423.883	194.901	0.888	277.989	0.8996	67467	0.7255	2.1749	0.1752	0.6558	0.007	0.0032	0.4301	0.9354	201.81	188.331	174.181	21.4259	24.0428	25.4469	0.2995	0.3598	0.5526	2.4413	2.4519	3.1488	Kirmizi_Pistachio
73508	1485.88	472.566	210.511	0.8953	305.93	0.9328	78807	0.6938	2.2449	0.4184	0.6474	0.0064	0.0029	0.4191	0.9408	211.518	204.198	192.685	20.6216	22.5388	24.4915	-0.5517	-0.4013	-0.0084	2.8569	2.7674	3.0239	Kirmizi_Pistachio
71848	1138.56	462.061	206.004	0.8951	302.456	0.9411	76343	0.7149	2.243	0.6965	0.6546	0.0064	0.0029	0.4285	0.9611	232.23	219.881	199.726	22.3685	22.921	22.8729	-1.2226	-1.0576	-0.6698	4.1088	3.7977	2.8894	Kirmizi_Pistachio
75029	1459.38	421.177	240.202	0.8214	309.079	0.936	80155	0.6927	1.7534	0.4427	0.7338	0.0056	0.0032	0.5385	0.9443	214.641	203.476	187.949	21.7308	24.2249	28.3911	-0.2294	0.0251	0.5039	2.5664	2.5919	2.6358	Kirmizi_Pistachio
53594	1321.15	386.377	182.459	0.8815	261.224	0.928	57755	0.7157	2.1176	0.3858	0.6761	0.0072	0.0034	0.4571	0.9679	204.496	184.213	187.928	19.3605	21.1571	20.8951	-0.3831	0.0963	-0.5673	2.2679	2.4445	2.4308	Kirmizi_Pistachio
81061	1692.1	457.365	236.015	0.8566	321.263	0.8837	91729	0.6486	1.9379	0.3558	0.7024	0.0056	0.0029	0.4934	0.9561	208.884	199.959	190.412	18.0746	18.0578	18.566	-0.8154	-0.6507	-0.3435	3.4055	3.2153	3.4118	Kirmizi_Pistachio
72169	1779.61	447.79	218.28	0.8731	303.131	0.9037	79861	0.6959	2.0514	0.2864	0.6769	0.0062	0.003	0.4583	0.9401	220.197	209.741	191.553	23.785	24.2936	23.8997	-0.8089	-0.7321	-0.6108	2.7331	2.6167	2.6417	Kirmizi_Pistachio
72129	1988.52	427.333	230.525	0.842	303.047	0.8418	85686	0.6516	1.8537	0.2292	0.7092	0.0059	0.0032	0.5029	0.9323	205.73	197.584	183.686	23.6054	25.0894	25.4004	-0.1549	-0.1642	-0.2886	2.0217	2.0476	2.0545	Kirmizi_Pistachio
88064	1329.15	460.867	245.507	0.8463	334.853	0.9734	90472	0.7548	1.8772	0.6264	0.7266	0.0052	0.0028	0.5279	0.991	226.72	214.355	200.647	20.8178	20.1862	20.945	-1.3455	-1.2785	-0.6109	4.3791	4.4034	3.5185	Kirmizi_Pistachio
77232	1117.43	439.695	230.579	0.8515	313.584	0.9518	81139	0.7547	1.9069	0.7773	0.7132	0.0057	0.003	0.5086	0.9699	207.783	198.069	182.163	18.0023	18.8175	19.1423	-0.3666	-0.1981	0.3282	3.1147	3.14	4.0481	Kirmizi_Pistachio
86454	1206.75	459.029	252.764	0.8347	331.778	0.9234	93621	0.7365	1.816	0.746	0.7228	0.0053	0.0029	0.5224	0.9487	222.218	207.014	184.592	23.035	24.9698	24.591	-0.2268	0.0004	-0.235	2.2477	2.3397	3.0161	Kirmizi_Pistachio
66146	1116.39	439.994	200.243	0.8904	290.206	0.9361	70660	0.7105	2.1973	0.6669	0.6596	0.0067	0.003	0.435	0.9559	208.523	193.453	176.16	17.3853	18.6101	18.6727	-0.5005	-0.5664	-0.168	2.6108	2.8409	2.7457	Kirmizi_Pistachio
73828	1987.05	457.034	266.923	0.8117	306.595	0.7965	92690	0.5934	1.7122	0.235	0.6708	0.0062	0.0036	0.45	0.7705	204.756	192.699	175.174	18.3616	18.4116	20.1473	-0.3724	-0.2118	-0.0513	2.6103	2.7395	3.3882	Kirmizi_Pistachio
67664	1218.53	439.377	198.236	0.8924	293.517	0.9616	70366	0.7544	2.2164	0.5727	0.668	0.0065	0.0029	0.4463	0.9891	213.519	198.61	197.973	21.565	22.195	22.5367	-0.4531	-0.1462	-0.5505	2.5024	2.52	2.6908	Kirmizi_Pistachio
76212	1184.29	457.336	219.239	0.8776	311.506	0.9665	78850	0.7664	2.086	0.6828	0.6811	0.006	0.0029	0.4639	0.9678	226.189	216.199	199.867	24.745	26.3089	26.7718	-0.9572	-0.7648	-0.6915	3.0659	2.776	2.8189	Kirmizi_Pistachio
78202	2082.62	444.662	250.82	0.8257	315.547	0.885	88363	0.7176	1.7728	0.2266	0.7096	0.0057	0.0032	0.5036	0.8928	212.397	201.84	193.279	20.0012	21.3387	20.1274	-0.6928	-0.6069	-0.4076	2.8089	2.775	3.0482	Kirmizi_Pistachio
74947	1074.43	407.242	238.328	0.8109	308.91	0.9794	76522	0.6641	1.7087	0.8158	0.7585	0.0054	0.0032	0.5754	0.9832	228.937	214.885	186.62	26.4352	26.4838	28.1067	-0.9386	-0.6133	-0.1951	2.8338	2.556	2.2426	Kirmizi_Pistachio
72594	1199.27	438.191	213.635	0.8731	304.022	0.9703	74818	0.789	2.0511	0.6343	0.6938	0.006	0.0029	0.4814	0.9874	214.451	198.088	174.52	18.5321	18.7139	18.8621	-0.623	-0.5041	-0.3204	3.3605	3.2981	3.5095	Kirmizi_Pistachio
73893	1104.08	437.978	217.096	0.8685	306.73	0.9807	75345	0.7864	2.0174	0.7618	0.7003	0.0059	0.0029	0.4905	0.9895	219.101	207.528	188.744	23.4703	24.7305	25.6342	-0.7022	-0.6509	-0.6045	2.3864	2.2302	2.2458	Kirmizi_Pistachio
55933	1065.74	364.35	200.601	0.8348	266.863	0.9568	58457	0.7136	1.8163	0.6188	0.7324	0.0065	0.0036	0.5365	0.9744	194.067	187.273	187.395	19.6358	19.7158	18.1535	-0.1164	-0.1439	-0.4499	2.0112	2.0226	2.1725	Kirmizi_Pistachio
71193	1147.62	422.249	219.261	0.8546	301.074	0.9629	73938	0.7072	1.9258	0.6793	0.713	0.0059	0.0031	0.5084	0.9791	214.63	199.257	175.261	18.0142	18.8944	23.16	-0.716	-0.1879	0.2722	3.562	3.3691	2.6977	Kirmizi_Pistachio
60789	1036.15	412.544	190.218	0.8874	278.207	0.9793	62075	0.7766	2.1688	0.7115	0.6744	0.0068	0.0031	0.4548	0.9863	219.139	205.369	179.522	19.5157	18.2867	15.628	-1.0538	-1.0865	-0.9543	3.4568	3.5848	3.6102	Kirmizi_Pistachio
71173	1650.58	394.6	240.736	0.7923	301.032	0.9181	77524	0.725	1.6391	0.3283	0.7629	0.0055	0.0034	0.582	0.954	206.757	196.379	184.163	19.8304	21.7147	25.6973	-0.3464	-0.2391	-0.3805	2.5493	2.5214	2.4504	Kirmizi_Pistachio
54675	1863.24	370.551	289.277	0.6249	263.845	0.6839	79942	0.5844	1.281	0.1979	0.712	0.0068	0.0053	0.507	0.6494	206.969	196.372	179.88	18.5805	19.5644	19.5957	-0.4828	-0.4238	-0.0284	2.7197	2.7935	3.1302	Kirmizi_Pistachio
63714	1652.21	415.703	222.042	0.8454	284.821	0.8545	74563	0.6452	1.8722	0.2933	0.6852	0.0065	0.0035	0.4694	0.8789	206.974	193.549	182.855	22.8899	24.8123	21.4818	-0.1081	-0.0346	0.1654	2.1643	2.3034	2.3779	Kirmizi_Pistachio
74823	1724.35	435.12	227.814	0.852	308.654	0.954	78432	0.7313	1.91	0.3162	0.7094	0.0058	0.003	0.5032	0.9611	221.056	211.388	190.462	25.5013	26.8349	27.3011	-0.5279	-0.2645	0.1111	2.3069	2.222	2.3276	Kirmizi_Pistachio
70394	1238.66	435.386	211.926	0.8735	299.38	0.9535	73828	0.7509	2.0544	0.5766	0.6876	0.0062	0.003	0.4728	0.9714	210.991	198.581	181.983	22.7878	25.5591	26.3111	-0.4421	-0.3574	-0.4399	2.0817	2.0828	2.2455	Kirmizi_Pistachio
79386	1257.47	462.474	231.065	0.8662	317.927	0.9291	85445	0.7082	2.0015	0.6309	0.6874	0.0058	0.0029	0.4726	0.9459	197.062	184.301	166.897	21.9464	23.5036	26.8017	0.4762	0.4421	0.398	2.2528	2.2101	2.2726	Kirmizi_Pistachio
75669	1436.56	415.889	239.32	0.8178	310.394	0.9406	80444	0.7388	1.7378	0.4608	0.7463	0.0055	0.0032	0.557	0.968	226.041	220.212	206.606	25.0632	29.4443	24.2776	-0.8315	-0.8545	-0.3025	2.7759	2.8401	2.46	Kirmizi_Pistachio
79239	1404.69	477.664	214.941	0.893	317.632	0.9535	83099	0.7731	2.2223	0.5046	0.665	0.006	0.0027	0.4422	0.9827	213.275	200.302	172.613	22.2079	22.9674	20.0073	-0.6836	-0.6328	-0.5517	2.2801	2.2514	2.3755	Kirmizi_Pistachio
71187	1247.15	429.857	221.467	0.8571	301.062	0.9273	76772	0.7332	1.941	0.5751	0.7004	0.006	0.0031	0.4905	0.9521	216.996	208.168	172.797	21.5272	23.2989	22.314	-0.9078	-0.8239	-0.4524	2.8037	2.7242	2.8954	Kirmizi_Pistachio
78980	1123.16	453.916	223.298	0.8706	317.113	0.988	79939	0.7749	2.0328	0.7868	0.6986	0.0057	0.0028	0.4881	0.9921	210.73	200.776	185.929	21.2241	21.1228	21.3873	-0.4179	-0.3737	-0.143	2.4042	2.3593	2.4423	Kirmizi_Pistachio
85974	1202.75	478.243	235.407	0.8705	330.856	0.9537	90150	0.7376	2.0316	0.7468	0.6918	0.0056	0.0027	0.4786	0.9723	210.168	197.757	176.898	17.4267	17.5561	17.4623	-0.9179	-0.8598	-0.5777	3.333	3.221	3.0767	Kirmizi_Pistachio
89960	1213.41	474.264	249.186	0.8508	338.438	0.9591	93799	0.7509	1.9033	0.7678	0.7136	0.0053	0.0028	0.5092	0.9692	229.654	222.628	209.702	23.2902	24.2656	22.7136	-1.2978	-1.2964	-1.096	3.6941	3.7635	3.5751	Kirmizi_Pistachio
91253	1257.92	488.475	246.149	0.8638	340.862	0.9548	95574	0.733	1.9845	0.7247	0.6978	0.0054	0.0027	0.4869	0.9663	228.31	220.409	204.242	24.8471	25.9597	25.9232	-0.8292	-0.7524	-0.3912	2.7795	2.679	2.2728	Kirmizi_Pistachio
70929	1181.1	409.94	228.543	0.8302	300.516	0.9574	74083	0.7485	1.7937	0.6389	0.7331	0.0058	0.0032	0.5374	0.9639	224.626	212.816	194.988	25.9451	28.0372	21.7815	-0.5907	-0.6809	-0.4204	2.2772	2.5458	2.3778	Kirmizi_Pistachio
61816	1103.55	409.649	201.605	0.8705	280.547	0.9454	65384	0.6297	2.0319	0.6379	0.6848	0.0066	0.0033	0.469	0.953	224.537	220.002	205.217	25.1574	29.8039	22.9742	-0.8514	-0.936	-0.3995	2.8476	3.0277	2.5362	Kirmizi_Pistachio
82234	1223.54	532.088	199.167	0.9273	323.579	0.982	83742	0.8033	2.6716	0.6903	0.6081	0.0065	0.0024	0.3698	0.988	216.716	200.605	175.373	18.2886	17.682	18.29	-0.526	-0.3377	0.2593	3.0942	2.8245	2.6064	Kirmizi_Pistachio
64524	1033.18	399.925	218.317	0.8379	286.626	0.9465	68168	0.7239	1.8319	0.7596	0.7167	0.0062	0.0034	0.5137	0.9409	224.071	211.944	193.983	20.5878	20.945	19.6246	-1.2335	-1.03	-0.5739	4.103	4.0707	3.7449	Kirmizi_Pistachio
75322	1100.25	429.344	227.78	0.8477	309.682	0.9727	77438	0.7473	1.8849	0.7819	0.7213	0.0057	0.003	0.5203	0.9806	227.605	216.064	193.61	26.4232	28.0896	25.8869	-0.658	-0.5082	-0.4907	2.3412	2.2071	2.1554	Kirmizi_Pistachio
85842	1185.73	494.42	223.844	0.8916	330.602	0.9792	87663	0.7891	2.2088	0.7672	0.6687	0.0058	0.0026	0.4471	0.9876	210.319	199.738	181.432	17.0947	17.958	17.9498	-0.5508	-0.3883	0.3983	3.0778	3.0756	2.9689	Kirmizi_Pistachio
75728	1080.58	431.736	224.406	0.8543	310.515	0.9911	76410	0.7184	1.9239	0.815	0.7192	0.0057	0.003	0.5173	0.9952	235.051	232.542	222.5	21.6435	22.3613	21.5412	-1.6554	-1.4619	-1.1813	5.6477	4.9371	3.8647	Kirmizi_Pistachio
83311	1208.88	473.014	228.644	0.8754	325.691	0.9687	86004	0.7708	2.0688	0.7164	0.6885	0.0057	0.0027	0.4741	0.9808	221.091	215.613	203.25	25.1763	26.4992	27.9161	-0.7625	-0.6936	-0.4717	2.5645	2.4078	2.2744	Kirmizi_Pistachio
43219	1409.62	321.425	210.829	0.7548	234.581	0.8082	53478	0.6842	1.5246	0.2733	0.7298	0.0074	0.0049	0.5326	0.812	185.522	168.884	181.129	12.6923	13.0676	14.3915	-0.0693	0.1285	-0.2135	2.5088	2.4241	2.487	Kirmizi_Pistachio
52670	986.601	352.524	195.561	0.832	258.962	0.9496	55464	0.757	1.8026	0.68	0.7346	0.0067	0.0037	0.5396	0.9728	200.463	193.235	186.718	21.205	22.6472	22.1725	-0.546	-0.5033	-0.3673	2.0643	1.9826	1.9908	Kirmizi_Pistachio
86591	1244.09	473.904	238.492	0.8641	332.041	0.9581	90376	0.6263	1.9871	0.703	0.7007	0.0055	0.0028	0.4909	0.9755	234.193	223.749	202.468	23.5044	24.4174	24.3475	-1.481	-1.3207	-0.7317	4.469	4.1513	3.0567	Kirmizi_Pistachio
72527	1143.35	437.595	217.299	0.868	303.882	0.9626	75343	0.6825	2.0138	0.6972	0.6944	0.006	0.003	0.4822	0.9711	226.248	216.619	197.818	26.0212	27.1283	26.2689	-0.8107	-0.7157	-0.5365	2.7125	2.5944	2.1958	Kirmizi_Pistachio
82856	1126.55	445.315	240.98	0.8409	324.801	0.9818	84394	0.7706	1.8479	0.8204	0.7294	0.0054	0.0029	0.532	0.9831	223.381	211.742	195.762	19.9321	21.2646	22.1045	-0.6573	-0.4868	0.2698	3.3836	3.2615	2.7042	Kirmizi_Pistachio
93411	1219.11	481.977	249.508	0.8556	344.869	0.9761	95702	0.717	1.9317	0.7898	0.7155	0.0052	0.0027	0.512	0.989	219.966	207.94	188.889	23.3806	23.2264	23.0823	-0.831	-0.6879	-0.4305	2.745	2.5169	2.2889	Kirmizi_Pistachio
83314	1369.23	469.619	231.982	0.8695	325.697	0.9517	87540	0.7047	2.0244	0.5584	0.6935	0.0056	0.0028	0.481	0.9737	228.169	216.981	196.913	28.5843	30.5127	26.9187	-0.7388	-0.6419	-0.6308	2.228	2.2612	2.2644	Kirmizi_Pistachio
72714	1151.33	432.348	217.968	0.8636	304.274	0.9809	74133	0.7431	1.9835	0.6893	0.7038	0.0059	0.003	0.4953	0.9824	236.913	231.342	221.388	24.6671	26.5102	29.1979	-1.4967	-1.2236	-0.9223	4.3975	3.6851	2.967	Kirmizi_Pistachio
80982	1198.7	484.662	217.901	0.8932	321.107	0.9682	83644	0.7887	2.2242	0.7082	0.6625	0.006	0.0027	0.439	0.9763	213.655	200.9	180.075	19.343	20.0622	20.5181	-0.3946	-0.34	-0.0886	2.8303	2.7181	3.0302	Kirmizi_Pistachio
83454	1212.94	478.766	228.147	0.8792	325.971	0.9643	86540	0.7338	2.0985	0.7128	0.6809	0.0057	0.0027	0.4636	0.9728	210.625	197.29	183.714	23.9857	24.777	22.399	-0.4043	-0.3687	-0.3754	2.1448	2.1305	2.4074	Kirmizi_Pistachio
88120	1266.14	462.086	246.73	0.8455	334.959	0.9753	90350	0.7594	1.8728	0.6908	0.7249	0.0052	0.0028	0.5255	0.9841	207.781	194.503	178.446	19.1736	19.6983	20.7159	-0.2299	-0.1648	-0.1473	2.4486	2.5252	2.6365	Kirmizi_Pistachio
83685	2178.19	476.724	236.472	0.8683	326.422	0.9119	91770	0.7235	2.016	0.2216	0.6847	0.0057	0.0028	0.4688	0.9452	207.11	191.808	173.731	18.5579	19.5395	20.1315	-0.0738	-0.002	0.6688	2.9788	3.2727	4.7961	Kirmizi_Pistachio
69946	1169.31	409.4	226.302	0.8333	298.426	0.9418	74269	0.7199	1.8091	0.6429	0.7289	0.0059	0.0032	0.5313	0.9613	222.615	209.659	192.737	28.0965	28.3406	28.1543	-0.5024	-0.5027	-0.5827	1.9461	2.0004	2.2971	Kirmizi_Pistachio
86365	1212.53	473.947	237.219	0.8657	331.607	0.9656	89440	0.7608	1.9979	0.7382	0.6997	0.0055	0.0027	0.4895	0.9781	232.31	223.968	217.995	24.8984	26.2755	28.1545	-1.094	-0.8705	-0.8122	3.2703	2.9883	2.848	Kirmizi_Pistachio
75231	1118.51	436.282	224.881	0.8569	309.495	0.964	78041	0.7559	1.9401	0.7557	0.7094	0.0058	0.003	0.5032	0.9763	212.72	202.999	201.027	22.7317	24.6349	26.748	-0.2207	0.0049	0.0996	2.5617	2.5685	2.427	Kirmizi_Pistachio
81341	1399.95	466.108	228.336	0.8718	321.818	0.9204	88378	0.7105	2.0413	0.5215	0.6904	0.0057	0.0028	0.4767	0.9731	206.837	193.301	177.964	19.4677	20.5216	21.3194	-0.3272	-0.0393	1.0148	3.0595	3.2392	5.3066	Kirmizi_Pistachio
83847	1201.15	471.148	232.141	0.8702	326.737	0.9622	87139	0.681	2.0296	0.7303	0.6935	0.0056	0.0028	0.4809	0.9761	206.683	196.576	185.277	17.1381	17.1979	16.9837	-0.8512	-0.5445	0.0983	3.9278	3.804	4.239	Kirmizi_Pistachio
66313	1090.27	408.458	209.482	0.8585	290.572	0.9786	67766	0.7091	1.9498	0.701	0.7114	0.0062	0.0032	0.5061	0.9868	224.019	207.326	182.24	26.4379	26.0933	21.6636	-0.4677	-0.2459	-0.0718	2.1679	2.2829	2.287	Kirmizi_Pistachio
80147	1168.08	480.604	214.696	0.8947	319.447	0.9809	81709	0.767	2.2385	0.7382	0.6647	0.006	0.0027	0.4418	0.989	234.707	228.176	203.037	23.6615	25.1707	25.048	-1.2589	-0.9617	-0.3497	3.8718	3.2928	2.287	Kirmizi_Pistachio
79711	1419.08	488.509	217.491	0.8954	318.577	0.9506	83855	0.7406	2.2461	0.4974	0.6521	0.0061	0.0027	0.4253	0.9552	203.402	189.628	172.531	22.3018	22.4209	21.5278	-0.146	-0.0364	0.0221	2.0161	1.9565	2.0291	Kirmizi_Pistachio
69805	1110.31	445.951	204.768	0.8883	298.125	0.9464	73757	0.6956	2.1778	0.7116	0.6685	0.0064	0.0029	0.4469	0.9733	219.142	208.14	189.835	26.4266	25.1774	20.3914	-0.6019	-0.7083	-0.805	2.4685	2.5926	2.8423	Kirmizi_Pistachio
74408	1743.99	431.685	238.055	0.8342	307.797	0.9321	79829	0.7392	1.8134	0.3074	0.713	0.0058	0.0032	0.5084	0.9219	214.895	205.121	191.382	24.4096	25.4252	20.6007	-0.7096	-0.5462	-0.2271	2.6045	2.3264	2.0431	Kirmizi_Pistachio
78877	1146.63	451.318	226.839	0.8645	316.906	0.9699	81322	0.7539	1.9896	0.7539	0.7022	0.0057	0.0029	0.4931	0.981	223.912	208.809	200.601	23.6954	24.0534	23.9535	-0.7856	-0.7917	-0.6166	2.8211	2.8058	2.4562	Kirmizi_Pistachio
86398	1205.19	492.846	228.716	0.8858	331.671	0.983	87888	0.7272	2.1548	0.7475	0.673	0.0057	0.0026	0.4529	0.9759	227.593	220.178	200.749	22.9477	22.7886	21.3592	-1.3499	-1.2975	-1.0373	4.1	4.0073	3.6262	Kirmizi_Pistachio
57739	1851.57	438.818	261.184	0.8036	271.138	0.717	80524	0.5507	1.6801	0.2116	0.6179	0.0076	0.0045	0.3818	0.6414	203.209	189.235	173.413	18.1735	17.7848	15.4542	-0.6154	-0.6303	-0.2969	2.4082	2.5598	2.4236	Kirmizi_Pistachio
66982	1265.8	435.892	202.331	0.8857	292.034	0.9255	72375	0.7004	2.1544	0.5253	0.67	0.0065	0.003	0.4489	0.967	211.783	202.147	190.19	25.6384	26.0135	23.3745	-0.6187	-0.5496	-0.4139	2.0132	1.9655	1.9722	Kirmizi_Pistachio
58016	1036.56	395.714	203.524	0.8576	271.787	0.9218	62937	0.6936	1.9443	0.6785	0.6868	0.0068	0.0035	0.4717	0.9172	215.44	200.956	182.366	25.4848	25.7292	24.1832	-0.556	-0.5054	-0.1271	2.2057	2.3472	2.4734	Kirmizi_Pistachio
89379	1250.2	480.181	242.665	0.8629	337.344	0.9573	93365	0.7632	1.9788	0.7186	0.7025	0.0054	0.0027	0.4936	0.9766	215.934	202.246	188.196	20.981	22.8783	25.8577	-0.3121	-0.119	-0.0658	2.5526	2.6619	2.9885	Kirmizi_Pistachio
57694	1651.34	401.092	205.951	0.8581	271.032	0.8647	66724	0.643	1.9475	0.2659	0.6757	0.007	0.0036	0.4566	0.8893	212.153	200.977	176.929	21.1496	21.7126	20.1442	-0.6502	-0.4913	0.0273	2.8709	2.8499	2.7282	Kirmizi_Pistachio
60132	1328.84	398.245	198.485	0.8669	276.699	0.9362	64231	0.7244	2.0064	0.4279	0.6948	0.0066	0.0033	0.4827	0.9686	204.814	185.991	154.466	18.6181	18.4574	18.8548	-0.5518	-0.4564	-0.5364	2.2589	2.3079	2.9852	Kirmizi_Pistachio
69461	1166.49	447.142	204.62	0.8891	297.389	0.9481	73263	0.7225	2.1852	0.6415	0.6651	0.0064	0.0029	0.4423	0.9666	215.311	200.795	185.086	21.4419	22.2841	24.1733	-0.5474	-0.4469	-0.1897	2.5801	2.5083	2.4383	Kirmizi_Pistachio
53105	1768.44	393.661	197.072	0.8657	260.03	0.8509	62407	0.6244	1.9976	0.2134	0.6605	0.0074	0.0037	0.4363	0.8716	176.288	164.586	173.954	12.6284	14.734	17.2422	0.6795	1.0775	1.1692	3.9048	4.6877	5.1737	Kirmizi_Pistachio
65943	1063.58	404.327	210.295	0.8541	289.761	0.9672	68181	0.7463	1.9227	0.7325	0.7166	0.0061	0.0032	0.5136	0.9875	225.656	220.042	208.598	26.9609	29.3646	27.3109	-0.9966	-0.9151	-0.7602	2.8855	2.7263	3.0955	Kirmizi_Pistachio
96240	1427.57	476.68	264.164	0.8324	350.052	0.9703	99186	0.7946	1.8045	0.5934	0.7344	0.005	0.0027	0.5393	0.9731	211.453	202.189	191.257	22.2145	22.8317	21.7606	-0.365	-0.2802	0.0338	2.2553	2.1642	2.3799	Kirmizi_Pistachio
73889	1094.2	449.031	211.399	0.8822	306.722	0.99	74633	0.6707	2.1241	0.7755	0.6831	0.0061	0.0029	0.4666	0.9911	236.792	232.714	207.612	24.6044	26.9198	24.8138	-1.4879	-1.2176	-0.8154	4.398	3.5468	2.618	Kirmizi_Pistachio
70612	1054.33	406.962	223.881	0.8351	299.843	0.9807	71999	0.7202	1.8178	0.7982	0.7368	0.0058	0.0032	0.5429	0.9868	224.889	214.218	196.014	22.8874	23.7647	21.4763	-1.0361	-1.0864	-0.5332	3.4387	3.5269	3.5045	Kirmizi_Pistachio
78579	1162.45	451.869	226.485	0.8653	316.307	0.9749	80602	0.7796	1.9951	0.7307	0.7	0.0058	0.0029	0.49	0.9776	211.882	202.673	190.349	19.3411	20.4986	21.9892	-0.5713	-0.229	0.4083	3.6784	3.4569	3.6051	Kirmizi_Pistachio
57152	1573.31	383.338	200.131	0.8529	269.756	0.8976	63674	0.72	1.9154	0.2901	0.7037	0.0067	0.0035	0.4952	0.9485	207.435	197.467	176.217	23.1193	25.331	28.6272	-0.341	-0.1266	0.3556	2.1048	2.0923	2.29	Kirmizi_Pistachio
50502	902.946	332.114	205.367	0.7859	253.577	0.924	54657	0.7095	1.6172	0.7784	0.7635	0.0066	0.0041	0.583	0.9428	227.505	220.168	205.178	27.1898	29.7259	30.5436	-0.8469	-0.7178	-0.5916	2.6295	2.4524	2.2173	Kirmizi_Pistachio
62031	1033.15	405.065	201.623	0.8673	281.034	0.961	64549	0.7328	2.009	0.7303	0.6938	0.0065	0.0033	0.4814	0.9671	203.864	189.862	179.065	17.1531	17.6278	18.5984	-0.5407	-0.4474	-0.4071	2.947	2.8381	2.6583	Kirmizi_Pistachio
75517	1195.34	441.001	229.592	0.8538	310.083	0.958	78827	0.723	1.9208	0.6642	0.7031	0.0058	0.003	0.4944	0.9496	223.74	210.908	186.031	27.5832	28.6883	30.4276	-0.7151	-0.6674	-0.5328	2.3668	2.2797	2.183	Kirmizi_Pistachio
79678	1465.28	496.369	224.761	0.8916	318.511	0.9265	86002	0.7619	2.2084	0.4663	0.6417	0.0062	0.0028	0.4118	0.9093	226.422	218.432	201.242	24.9518	27.2634	25.2065	-0.9042	-0.7728	-0.2831	3.0602	3.0528	2.448	Kirmizi_Pistachio
78934	1145.33	463.971	224.535	0.8751	317.02	0.9763	80847	0.724	2.0664	0.7562	0.6833	0.0059	0.0028	0.4669	0.9647	214.767	205.805	190.843	17.986	18.1622	19.1801	-1.1472	-0.9659	-0.3609	4.3164	4.0242	4.0054	Kirmizi_Pistachio
74947	1106.29	434.237	224.26	0.8563	308.91	0.9614	77960	0.7833	1.9363	0.7695	0.7114	0.0058	0.003	0.5061	0.9799	223.757	218.346	199.916	27.4269	29.8642	28.3655	-0.5959	-0.4865	-0.4907	2.2665	2.1086	2.0913	Kirmizi_Pistachio
59860	1536.38	426.625	189.497	0.8959	276.073	0.8997	66536	0.6971	2.2514	0.3187	0.6471	0.0071	0.0032	0.4188	0.9428	199.929	177.724	192.771	17.9149	18.4788	20.6436	-0.3335	-0.386	-0.1081	2.2156	2.2649	2.382	Kirmizi_Pistachio
93962	1588.45	493.872	249.835	0.8626	345.885	0.9453	99398	0.7502	1.9768	0.468	0.7004	0.0053	0.0027	0.4905	0.9696	217.752	211.335	190.116	22.2249	24.8683	21.2467	-0.4856	-0.6289	-0.641	2.6675	2.8087	3.1927	Kirmizi_Pistachio
72353	1711.05	425.329	243.441	0.82	303.517	0.8778	82427	0.6734	1.7472	0.3106	0.7136	0.0059	0.0034	0.5092	0.8897	210.119	199.285	182.061	24.7887	25.4755	26.4907	-0.2931	-0.2474	-0.0406	2.1941	2.1272	2.0567	Kirmizi_Pistachio
82561	1155.2	473.571	225.813	0.879	324.222	0.9812	84144	0.7872	2.0972	0.7774	0.6846	0.0057	0.0027	0.4687	0.983	236.112	231.014	209.084	22.68	24.2698	22.5949	-1.3895	-1.1341	-0.6242	4.3848	3.7799	3.083	Kirmizi_Pistachio
70959	1185.3	411.661	224.465	0.8383	300.579	0.958	74073	0.7419	1.834	0.6347	0.7302	0.0058	0.0032	0.5331	0.9778	220.703	207.965	187.874	27.7237	29.6855	28.5061	-0.4107	-0.1944	-0.1049	2.0001	2.1084	2.0396	Kirmizi_Pistachio
77153	1120.84	449.64	222.751	0.8687	313.423	0.9755	79088	0.7671	2.0186	0.7718	0.6971	0.0058	0.0029	0.4859	0.9808	220.749	209.697	191.75	22.8311	22.6261	20.3791	-0.9631	-0.8658	-0.473	3.1622	3.2166	3.1052	Kirmizi_Pistachio
73958	1096.21	431.001	225.065	0.8528	306.865	0.9645	76683	0.7968	1.915	0.7734	0.712	0.0058	0.003	0.5069	0.9708	213.087	200.018	189.261	19.0471	20.3931	19.3465	-0.5416	-0.3817	-0.0138	3.1841	3.0755	3.6892	Kirmizi_Pistachio
73575	1607.1	393.516	251.221	0.7697	306.07	0.9454	77822	0.711	1.5664	0.358	0.7778	0.0053	0.0034	0.6049	0.9476	202.153	189.05	165.649	18.6806	18.4456	19.2969	-0.1949	0.0002	0.6372	2.8935	2.8811	3.2046	Kirmizi_Pistachio
78524	1121.85	449.941	225.979	0.8647	316.196	0.983	79880	0.7807	1.9911	0.784	0.7028	0.0057	0.0029	0.4939	0.9833	208.126	199.387	183.088	17.7291	18.6341	19.492	-0.6455	-0.3588	-0.1898	3.3911	3.1726	3.7873	Kirmizi_Pistachio
58434	1050.4	416.483	180.324	0.9014	272.764	0.9809	59570	0.7556	2.3096	0.6655	0.6549	0.0071	0.0031	0.4289	0.9907	210.372	200.804	187.57	19.7561	19.9417	17.6898	-0.8356	-0.6558	-0.5016	3.0503	2.8351	2.899	Kirmizi_Pistachio
69554	1802.28	431.899	215.11	0.8671	297.589	0.9313	74684	0.709	2.0078	0.2691	0.689	0.0062	0.0031	0.4748	0.9532	205.618	193.315	168.4	19.9731	20.4426	19.969	-0.3962	-0.3907	-0.692	2.1821	2.2392	2.7939	Kirmizi_Pistachio
80287	1442.08	451.696	233.384	0.8562	319.726	0.9434	85101	0.7366	1.9354	0.4851	0.7078	0.0056	0.0029	0.501	0.9697	203.747	192.648	180.159	17.6352	19.1372	17.9194	-0.7836	-0.6432	-0.1725	2.9718	2.7825	3.593	Kirmizi_Pistachio
61458	1268.52	380.2	216.393	0.8222	279.733	0.9132	67303	0.7291	1.757	0.4799	0.7358	0.0062	0.0035	0.5413	0.9511	189.987	181.618	172.051	13.5096	12.9677	13.2572	-0.4811	-0.3943	0.1872	3.1236	3.2714	4.6439	Kirmizi_Pistachio
73406	1149.16	432.67	218.679	0.8629	305.718	0.9714	75571	0.7501	1.9786	0.6985	0.7066	0.0059	0.003	0.4993	0.9878	208.955	195.4	183.769	17.2806	18.2713	18.8355	-0.6166	-0.4557	0.5025	3.5708	3.5983	4.5203	Kirmizi_Pistachio
66244	1056.39	409.153	209.453	0.859	290.421	0.972	68153	0.7885	1.9534	0.746	0.7098	0.0062	0.0032	0.5038	0.9842	221.695	208.315	197.83	22.1099	23.0002	20.3504	-1.0315	-0.9252	-0.6577	3.0182	2.8786	3.0539	Kirmizi_Pistachio
79450	1231.01	453.943	252.109	0.8316	318.055	0.8903	89238	0.672	1.8006	0.6588	0.7006	0.0057	0.0032	0.4909	0.8839	220.086	214.291	201.384	24.2715	25.1207	22.47	-0.8614	-0.8219	-0.5765	2.9043	2.9942	2.6107	Kirmizi_Pistachio
72913	1257.58	443.135	222.087	0.8653	304.69	0.9238	78924	0.7233	1.9953	0.5794	0.6876	0.0061	0.003	0.4728	0.9433	223.241	210.239	188.641	26.5308	27.5002	24.8946	-0.7387	-0.7835	-0.7076	2.338	2.4932	2.6304	Kirmizi_Pistachio
70954	1366.36	430.339	214.805	0.8665	300.568	0.9637	73626	0.7484	2.0034	0.4776	0.6984	0.0061	0.003	0.4878	0.9773	217.355	207.807	203.326	20.9836	22.1027	23.1846	-1.1328	-1.0421	-0.7261	3.5123	3.3003	2.6021	Kirmizi_Pistachio
64076	1009.7	374.442	224.966	0.7994	285.629	0.9485	67552	0.6936	1.6644	0.7898	0.7628	0.0058	0.0035	0.5819	0.9685	208.318	194.951	177.713	15.0651	15.8784	15.0404	-0.6662	-0.5064	0.2468	4.0264	3.9101	3.9505	Kirmizi_Pistachio
77532	1084.23	443.711	223.713	0.8636	314.192	0.9919	78163	0.8064	1.9834	0.8288	0.7081	0.0057	0.0029	0.5014	0.9945	236.257	225.397	210.145	20.5311	20.5842	20.3171	-1.4808	-1.3221	-1.0031	4.7626	4.4166	3.4098	Kirmizi_Pistachio
70984	1781.96	435.956	215.023	0.8699	300.632	0.9328	76099	0.7417	2.0275	0.2809	0.6896	0.0061	0.003	0.4755	0.9641	223.912	211.472	191.371	27.0489	28.0182	26.8895	-0.6793	-0.6505	-0.5622	2.1594	2.2344	2.2874	Kirmizi_Pistachio
81224	1304.13	474.417	223.695	0.8819	321.586	0.9679	83918	0.7404	2.1208	0.6001	0.6779	0.0058	0.0028	0.4595	0.9745	210.032	198.18	182.383	17.7137	19.1327	21.7974	-0.3466	-0.0732	0.6244	3.2421	3.1096	3.7949	Kirmizi_Pistachio
71196	1283.2	459.19	199.606	0.9006	301.081	0.9759	72955	0.7349	2.3005	0.5433	0.6557	0.0064	0.0028	0.4299	0.989	212.458	203.312	188.288	17.1659	17.8084	18.5332	-1.0917	-0.9385	-0.443	3.9371	3.6356	3.9714	Kirmizi_Pistachio
80375	1185.63	478.162	218.505	0.8895	319.901	0.9648	83304	0.7931	2.1883	0.7185	0.669	0.0059	0.0027	0.4476	0.9795	229.262	219.707	201.692	26.3197	27.0697	27.4484	-0.9608	-0.7987	-0.3716	2.7378	2.6237	2.3918	Kirmizi_Pistachio
76621	1647.16	443.207	228.311	0.8571	312.341	0.9492	80722	0.7451	1.9412	0.3549	0.7047	0.0058	0.003	0.4966	0.9641	216.019	206.277	194.438	26.3325	27.2026	29.1716	-0.2455	-0.2177	-0.1118	1.944	1.9551	1.9638	Kirmizi_Pistachio
90806	1261.68	490.585	246.784	0.8643	340.026	0.953	95285	0.7151	1.9879	0.7168	0.6931	0.0054	0.0027	0.4804	0.955	226.889	217.759	200.038	25.5915	27.4261	28.9185	-0.763	-0.5905	-0.3806	2.6424	2.4268	1.9626	Kirmizi_Pistachio
77732	2198.8	431.056	253.546	0.8087	314.597	0.8998	86390	0.7072	1.7001	0.202	0.7298	0.0055	0.0033	0.5327	0.9056	216.63	205.268	183.034	20.2563	22.1589	19.3329	-0.6827	-0.6218	-0.2745	2.9018	2.8319	2.8874	Kirmizi_Pistachio
78170	1247.08	457.343	219.218	0.8776	315.482	0.979	79849	0.7268	2.0862	0.6316	0.6898	0.0059	0.0028	0.4758	0.9927	228.936	219.511	206.277	24.8058	26.0634	26.6668	-0.9842	-0.8858	-0.741	2.9173	2.7873	2.6691	Kirmizi_Pistachio
75537	1130.65	476.357	203.201	0.9045	310.124	0.9848	76701	0.7764	2.3443	0.7425	0.651	0.0063	0.0027	0.4238	0.9936	233.672	230.89	211.282	25.2421	27.4811	29.1772	-1.0673	-0.9136	-0.6153	3.1044	2.689	2.2504	Kirmizi_Pistachio
93052	1209.53	470.668	257.616	0.8369	344.206	0.9595	96978	0.7569	1.827	0.7993	0.7313	0.0051	0.0028	0.5348	0.9771	226.519	215.271	197.776	20.6638	20.223	19.1714	-1.2201	-1.0351	-0.306	4.1557	3.9299	3.2936	Kirmizi_Pistachio
74511	1180.35	485.093	201.31	0.9098	308.01	0.9628	77389	0.6244	2.4097	0.6721	0.635	0.0065	0.0027	0.4032	0.9715	209.012	198.237	181.358	18.3093	19.6399	23.4088	-0.2634	0.2505	0.8466	3.7398	4.0916	4.5831	Kirmizi_Pistachio
56812	1848.33	421.598	210.097	0.867	268.952	0.8006	70961	0.6587	2.0067	0.209	0.6379	0.0074	0.0037	0.407	0.8166	206.892	198.589	183.201	21.1541	22.2283	23.0412	-0.3368	-0.231	-0.1465	2.4464	2.4471	2.4291	Kirmizi_Pistachio
73916	1118.74	445.627	215.177	0.8757	306.778	0.9764	75706	0.7336	2.071	0.7422	0.6884	0.006	0.0029	0.4739	0.9815	212.591	200.982	183.505	16.5158	17.7175	19.4792	-0.7835	-0.2709	0.5564	4.2756	3.8023	3.9421	Kirmizi_Pistachio
73069	2222.8	432.1	250.93	0.8141	305.015	0.8754	83471	0.7058	1.722	0.1858	0.7059	0.0059	0.0034	0.4983	0.858	218.581	201.34	174.444	19.6823	19.8523	18.5166	-0.7253	-0.7362	-0.3326	2.9441	3.0835	3.555	Kirmizi_Pistachio
29808	1687.61	339.054	138.534	0.9127	194.815	0.7584	39306	0.4372	2.4474	0.1315	0.5746	0.0114	0.0046	0.3301	0.808	169.685	162.623	188.509	13.1807	16.7458	15.3618	1.1467	1.2966	1.2951	4.8603	5.0006	5.5091	Kirmizi_Pistachio
73633	1077.49	419.57	228.122	0.8393	306.19	0.9823	74959	0.7496	1.8392	0.797	0.7298	0.0057	0.0031	0.5326	0.9795	237.846	231.978	207.851	22.243	23.1152	22.1267	-1.4577	-1.1661	-0.247	4.5152	3.6937	2.9464	Kirmizi_Pistachio
79179	1101.12	434.65	232.737	0.8446	317.512	0.991	79902	0.8006	1.8676	0.8206	0.7305	0.0055	0.0029	0.5336	0.9966	213.189	202.49	179.536	21.7652	22.7203	20.5354	-0.1133	-0.1135	0.0411	2.4343	2.4096	2.4798	Kirmizi_Pistachio
60774	1101.72	414.708	190.673	0.888	278.172	0.9625	63142	0.6233	2.175	0.6292	0.6708	0.0068	0.0031	0.4499	0.9786	204.997	192.081	169.34	17.6021	19.4662	25.0437	-0.2325	0.1495	0.7061	3.1556	2.989	3.4488	Kirmizi_Pistachio
73139	1852.67	419.584	237.527	0.8243	305.161	0.8891	82258	0.6828	1.7665	0.2678	0.7273	0.0057	0.0032	0.529	0.9344	215.175	202.271	183.488	22.5739	24.0774	25.7817	-0.3748	-0.2865	-0.3724	2.1875	2.1796	2.3987	Kirmizi_Pistachio
72798	1259.91	473.343	212.138	0.8939	304.449	0.905	80437	0.6253	2.2313	0.5763	0.6432	0.0065	0.0029	0.4137	0.9231	223.33	212.033	191.113	26.7425	29.3886	27.9443	-0.5973	-0.4499	-0.436	2.2019	2.1303	2.267	Kirmizi_Pistachio
78195	1202.54	462.156	236.585	0.859	315.533	0.8876	88093	0.6845	1.9534	0.6795	0.6827	0.0059	0.003	0.4661	0.9106	237.592	227.756	198.993	23.8813	26.6911	23.3967	-1.6144	-1.1669	-1.1002	4.7469	3.7457	3.8475	Kirmizi_Pistachio
62110	1340.76	454.702	177.153	0.921	281.213	0.9563	64949	0.7497	2.5667	0.4342	0.6185	0.0073	0.0029	0.3825	0.9817	202.811	187.688	167.945	17.3999	20.4895	26.5526	0.0662	0.242	0.3091	2.8343	2.8306	3.1979	Kirmizi_Pistachio
64299	1555.18	433.508	197.807	0.8898	286.126	0.9325	68951	0.7473	2.1916	0.3341	0.66	0.0067	0.0031	0.4356	0.9547	225.55	210.241	171.042	25.6193	24.2819	20.7862	-0.8069	-0.8067	-0.8917	2.5205	2.4934	2.6902	Kirmizi_Pistachio
77225	1909.59	443.355	256.356	0.8159	313.57	0.8581	89995	0.6479	1.7295	0.2661	0.7073	0.0057	0.0033	0.5002	0.8651	213.568	203.107	182.896	23.011	24.3559	23.8659	-0.4742	-0.4244	-0.4103	2.1607	2.1613	2.3371	Kirmizi_Pistachio
61882	1113.62	415.398	193.677	0.8847	280.697	0.9435	65589	0.7461	2.1448	0.627	0.6757	0.0067	0.0031	0.4566	0.9793	208.777	195.565	178.184	21.7525	24.2021	28.684	-0.2722	-0.1824	0.0244	1.9616	1.9662	2.1814	Kirmizi_Pistachio
71894	1259.4	462.183	209.758	0.8911	302.553	0.917	78404	0.6902	2.2034	0.5696	0.6546	0.0064	0.0029	0.4285	0.9442	203.6	184.044	196.865	20.0712	22.457	21.7823	0.2226	0.5654	0.0821	2.9434	3.3146	2.5276	Kirmizi_Pistachio
63698	1806.11	434.049	221.384	0.8601	284.786	0.8302	76723	0.6395	1.9606	0.2454	0.6561	0.0068	0.0035	0.4305	0.844	223.442	215.119	196.63	25.9187	26.7969	26.8015	-0.6609	-0.6689	-0.5721	2.3144	2.3827	2.4982	Kirmizi_Pistachio
72405	1150.85	470.949	198.519	0.9068	303.626	0.9654	74997	0.7682	2.3723	0.687	0.6447	0.0065	0.0027	0.4157	0.9861	218.258	204.812	178.76	20.749	22.0774	25.1499	-0.7005	-0.3783	0.1049	2.9508	2.7279	2.7598	Kirmizi_Pistachio
53446	1814.18	379.4	191.585	0.8631	260.863	0.8937	59800	0.7345	1.9803	0.2041	0.6876	0.0071	0.0036	0.4727	0.9362	182.335	166.547	157.432	12.7896	14.4923	16.2521	1.4046	1.5741	1.6569	6.8633	7.7662	7.539	Kirmizi_Pistachio
60008	935.789	351.965	221.957	0.7761	276.414	0.9903	60596	0.7006	1.5857	0.8611	0.7853	0.0059	0.0037	0.6168	0.978	234.984	228.447	204.145	23.5708	24.7132	23.388	-1.3742	-1.0818	-0.8024	4.1417	3.6287	3.3141	Kirmizi_Pistachio
60847	1760.17	371.366	230.194	0.7847	278.339	0.8449	72021	0.6548	1.6133	0.2468	0.7495	0.0061	0.0038	0.5618	0.9063	199.65	186.537	174.162	18.7871	20.6093	23.8406	-0.0059	0.2021	0.2321	2.3825	2.5533	3.1973	Kirmizi_Pistachio
82017	2699.07	426.525	273.529	0.7673	323.152	0.8479	96733	0.6657	1.5593	0.1415	0.7576	0.0052	0.0033	0.574	0.8951	201.355	185.188	167.562	20.1581	22.8757	23.0541	0.0354	0.0576	0.1981	2.1603	2.2605	2.9051	Kirmizi_Pistachio
52600	1148.28	361.688	193.274	0.8453	258.79	0.9081	57923	0.7242	1.8714	0.5013	0.7155	0.0069	0.0037	0.512	0.9581	179.445	165.982	159.379	13.4353	14.3049	13.8312	0.6112	0.6027	0.7143	2.8733	2.7815	2.8331	Kirmizi_Pistachio
77869	1853.88	421.253	240.819	0.8205	314.874	0.9544	81591	0.7079	1.7493	0.2847	0.7475	0.0054	0.0031	0.5587	0.9773	228.451	209.705	178.128	25.3395	26.5277	30.5336	-0.7159	-0.6372	-0.6155	2.3924	2.2307	2.6791	Siirt_Pistachio
94948	1184.85	456.392	267.663	0.81	347.695	0.9908	95826	0.7605	1.7051	0.8499	0.7618	0.0048	0.0028	0.5804	0.9896	218.526	199.502	169.724	18.6123	17.4126	18.9127	-0.4128	-0.3753	0.076	3.1365	2.8308	2.8503	Siirt_Pistachio
92639	1792.03	456.487	275.167	0.7979	343.441	0.9226	100409	0.7494	1.6589	0.3625	0.7524	0.0049	0.003	0.566	0.939	228.352	211.328	181.035	22.2685	21.6097	24.6733	-0.8443	-0.7804	-0.9343	2.8944	2.948	4.104	Siirt_Pistachio
84309	1524.92	442.216	246.172	0.8307	327.636	0.9648	87388	0.7535	1.7964	0.4556	0.7409	0.0052	0.0029	0.5489	0.9861	218.567	196.407	169.473	19.273	20.4494	19.7311	-0.5847	-0.5965	-0.5324	2.7717	2.6812	2.6696	Siirt_Pistachio
74673	1955.65	450.733	237.106	0.8505	308.345	0.8704	85791	0.6051	1.901	0.2454	0.6841	0.006	0.0032	0.468	0.8896	228.743	210.104	178.259	20.8304	21.9959	19.1794	-1.0947	-1.1018	-0.875	3.4917	3.4489	3.1175	Siirt_Pistachio
83267	1113.11	438.427	243.751	0.8312	325.605	0.993	83855	0.7199	1.7987	0.8445	0.7427	0.0053	0.0029	0.5516	0.9921	227.369	213.476	187.299	18.2454	19.1177	21.3279	-0.624	-0.3987	-0.18	3.3034	2.8063	2.3363	Siirt_Pistachio
106985	1239.33	464.89	294.273	0.7742	369.077	0.9917	107881	0.7514	1.5798	0.8753	0.7939	0.0043	0.0028	0.6303	0.9957	230.033	226.209	201.744	20.1665	23.2055	27.4989	-0.8693	-0.7492	-0.7061	3.3472	2.9588	3.0337	Siirt_Pistachio
93344	2049.69	436.404	289.125	0.749	344.745	0.9277	100616	0.6573	1.5094	0.2792	0.79	0.0047	0.0031	0.6241	0.9419	229.031	220.113	198.432	19.1604	20.707	17.6457	-1.0432	-0.998	-0.5007	3.6733	3.6024	3.2494	Siirt_Pistachio
95646	1201.9	473.984	259.096	0.8374	348.97	0.9846	97146	0.7337	1.8294	0.832	0.7362	0.005	0.0027	0.5421	0.9916	223.214	210.943	185.486	20.3776	21.8757	25.597	-0.4101	-0.4393	-0.615	2.4221	2.4613	2.8953	Siirt_Pistachio
78516	1735.16	430.883	247.116	0.8192	316.18	0.8993	87307	0.6943	1.7436	0.3277	0.7338	0.0055	0.0031	0.5385	0.9389	221.578	205.523	181.08	18.5239	19.2321	21.4554	-1.1763	-1.0301	-0.7452	3.9237	3.5699	3.1196	Siirt_Pistachio
98748	1202.09	443.26	284.546	0.7668	354.584	0.988	99952	0.7643	1.5578	0.8588	0.7999	0.0045	0.0029	0.6399	0.9968	218.61	207.474	182.958	19.9447	19.7135	19.9747	-0.8751	-0.8048	-0.5749	2.9762	2.8648	3.7368	Siirt_Pistachio
84925	1264.47	463.559	235.181	0.8617	328.831	0.9751	87098	0.6506	1.9711	0.6675	0.7094	0.0055	0.0028	0.5032	0.9918	221.394	211.853	190.367	18.398	20.5833	24.2083	-0.9827	-0.9088	-0.7904	3.5634	3.1951	3.0351	Siirt_Pistachio
79779	1489.55	456.651	249.117	0.8381	318.713	0.8874	89901	0.5989	1.8331	0.4518	0.6979	0.0057	0.0031	0.4871	0.8929	220.314	200.386	172.188	23.4165	24.1541	23.6436	-0.4201	-0.4056	-0.3609	2.1085	2.0526	2.5972	Siirt_Pistachio
69990	1146.67	460.886	196.048	0.905	298.52	0.9836	71156	0.7233	2.3509	0.6689	0.6477	0.0066	0.0028	0.4195	0.9863	235.012	222.328	194.465	18.628	22.9196	25.8146	-1.1286	-0.9088	-0.6115	3.6581	3.1	2.503	Siirt_Pistachio
78122	2067.52	427.584	319.655	0.6642	315.385	0.7377	105901	0.5854	1.3376	0.2297	0.7376	0.0055	0.0041	0.5441	0.7277	225.66	217.698	195.882	19.4842	22.1188	25.2566	-0.9962	-0.7964	-0.5117	3.4744	3.0824	2.7274	Siirt_Pistachio
84116	1185.66	436.456	250.659	0.8186	327.261	0.9579	87812	0.7727	1.7412	0.7519	0.7498	0.0052	0.003	0.5622	0.979	220.383	208.528	192.375	20.1551	21.1621	19.1289	-0.8994	-0.7291	-0.5896	3.6686	3.3864	3.6735	Siirt_Pistachio
85071	2231.43	478.178	268.844	0.827	329.114	0.8331	102111	0.5591	1.7786	0.2147	0.6883	0.0056	0.0032	0.4737	0.8426	226.64	218.422	193.694	24.5008	29.2331	31.1238	-0.5451	-0.3153	-0.1443	2.17	1.8952	1.9941	Siirt_Pistachio
78161	2427.23	433.29	273.869	0.7749	315.464	0.8389	93175	0.6549	1.5821	0.1667	0.7281	0.0055	0.0035	0.5301	0.8386	220.672	203.931	172.742	24.3185	25.446	24.7351	-0.3528	-0.2963	-0.1734	2.1855	2.2116	2.135	Siirt_Pistachio
90816	2626.71	427.477	299.776	0.7129	340.045	0.8778	103459	0.6646	1.426	0.1654	0.7955	0.0047	0.0033	0.6328	0.9023	227.746	213.406	186.397	19.1474	19.0779	19.3102	-1.0901	-1.1043	0.4065	3.8073	4.2357	3.8736	Siirt_Pistachio
73636	2017.97	441.126	310.928	0.7094	306.196	0.7366	99970	0.5035	1.4187	0.2272	0.6941	0.006	0.0042	0.4818	0.6836	221.195	218.302	193.08	18.8598	20.3106	18.8189	-0.8846	-0.726	-0.2242	3.4626	3.2473	2.4941	Siirt_Pistachio
82217	1127.79	433.821	248.682	0.8194	323.546	0.9581	85812	0.7423	1.7445	0.8123	0.7458	0.0053	0.003	0.5562	0.9703	225.757	207.614	187.184	22.8421	24.2989	19.2319	-0.8524	-0.9491	-0.8562	2.7947	2.9686	2.92	Siirt_Pistachio
107677	1348.15	486.63	282.828	0.8138	370.268	0.9848	109334	0.7706	1.7206	0.7445	0.7609	0.0045	0.0026	0.5789	0.9961	216.377	209.499	187.155	18.23	18.7736	20.4145	-0.7752	-0.5873	0.3101	3.3858	3.371	4.3558	Siirt_Pistachio
79688	1165.88	421.96	241.524	0.82	318.531	0.9836	81016	0.78	1.7471	0.7367	0.7549	0.0053	0.003	0.5698	0.9956	222.058	211.722	192.231	20.6363	21.6425	22.8592	-0.7319	-0.5245	-0.2057	2.9386	2.625	2.4371	Siirt_Pistachio
95049	1432.09	455.447	267.424	0.8095	347.88	0.979	97091	0.7213	1.7031	0.5824	0.7638	0.0048	0.0028	0.5834	0.9936	217.189	202.914	179.172	20.4055	20.2435	23.0113	-0.7965	-0.7344	-0.5391	2.7796	2.7348	2.7905	Siirt_Pistachio
69720	2097.37	439.052	282.685	0.7651	297.943	0.7442	93680	0.5664	1.5531	0.1992	0.6786	0.0063	0.0041	0.4605	0.7152	226.637	211.006	184.148	22.0305	23.1758	24.9635	-0.6192	-0.499	-0.2704	2.5822	2.4949	2.1935	Siirt_Pistachio
97287	1349.11	451.37	280.094	0.7842	351.951	0.9558	101790	0.6436	1.6115	0.6717	0.7797	0.0046	0.0029	0.608	0.9798	212.6	201.382	192.954	23.2042	24.6515	26.0537	-0.4382	-0.4326	-0.408	2.1802	2.1369	2.4594	Siirt_Pistachio
85833	1663.24	431.85	279.952	0.7614	330.584	0.9059	94748	0.6788	1.5426	0.3899	0.7655	0.005	0.0033	0.586	0.904	221.438	206.488	185.594	26.5245	28.9484	27.2782	-0.3911	-0.4417	-0.6626	1.9647	2.0855	2.9839	Siirt_Pistachio
83296	1148.04	418.787	254.317	0.7945	325.662	0.9837	84677	0.7406	1.6467	0.7942	0.7776	0.005	0.0031	0.6047	0.9958	235.499	213.126	179.531	21.0192	21.6389	23.4058	-1.1428	-1.0086	-0.8115	3.5906	3.3686	3.0883	Siirt_Pistachio
96857	1219.08	478.254	259.948	0.8394	351.173	0.977	99135	0.7409	1.8398	0.819	0.7343	0.0049	0.0027	0.5392	0.992	229.939	218.344	191.216	22.7013	23.1842	22.3237	-1.0739	-0.9365	-0.6656	3.3581	3.101	2.809	Siirt_Pistachio
71581	1464.89	351.685	275.71	0.6208	301.894	0.9179	77983	0.6848	1.2756	0.4192	0.8584	0.0049	0.0039	0.7369	0.9399	224.181	207.838	192.12	22.2042	24.2314	28.2312	-0.708	-0.6589	-0.2556	2.7742	2.6708	2.3096	Siirt_Pistachio
86383	2266.78	424.935	283.562	0.7448	331.642	0.8891	97156	0.7221	1.4986	0.2113	0.7805	0.0049	0.0033	0.6091	0.9128	215.164	196.201	168.52	22.3254	24.1615	17.381	-0.3776	-0.5484	-0.5424	2.1907	2.2846	3.1274	Siirt_Pistachio
91551	2015.59	462.186	264.305	0.8204	341.418	0.9273	98725	0.7426	1.7487	0.2832	0.7387	0.005	0.0029	0.5457	0.9542	231.119	220.821	197.001	26.9466	32.171	28.4086	-0.916	-0.682	-0.5834	2.6057	2.2417	2.3856	Siirt_Pistachio
83638	1297.02	440.18	242.855	0.834	326.33	0.9859	84835	0.7738	1.8125	0.6248	0.7414	0.0053	0.0029	0.5496	0.9962	220.653	211.028	196.337	18.3155	18.8937	16.704	-1.2033	-1.1622	-0.6598	4.1287	4.0003	3.6928	Siirt_Pistachio
84510	1160.54	427.498	253.074	0.8059	328.027	0.9883	85512	0.7941	1.6892	0.7885	0.7673	0.0051	0.003	0.5888	0.9946	216.706	203.493	191.353	19.1469	18.879	20.2463	-1.0062	-0.7217	-0.3109	3.6774	3.3428	3.1942	Siirt_Pistachio
92918	1398.02	452.122	263.238	0.813	343.958	0.9807	94745	0.7565	1.7175	0.5974	0.7608	0.0049	0.0028	0.5788	0.994	215.596	201.306	178.915	17.6316	18.5622	21.5661	-1.057	-0.9107	-0.4676	3.6071	3.4714	3.5659	Siirt_Pistachio
76791	1936.09	426.544	334.088	0.6217	312.687	0.7467	102843	0.5869	1.2767	0.2574	0.7331	0.0056	0.0044	0.5374	0.6861	212.623	196.181	176.223	15.9084	16.7564	15.6105	-1.1026	-0.923	-0.338	3.8019	3.3906	2.9858	Siirt_Pistachio
99320	1427.22	491.883	260.135	0.8487	355.61	0.9688	102517	0.7763	1.8909	0.6127	0.723	0.005	0.0026	0.5227	0.9883	205.604	188.047	167.557	18.1389	18.0122	17.091	-0.3337	-0.361	-0.4593	2.4862	2.5239	3.4691	Siirt_Pistachio
87510	1563.7	395.927	298.981	0.6556	333.798	0.9084	96336	0.7162	1.3243	0.4497	0.8431	0.0045	0.0034	0.7108	0.9413	205.519	188.824	176.111	17.4595	20.7212	19.0385	-0.2783	-0.5096	0.1988	3.0908	2.7779	4.1621	Siirt_Pistachio
98876	1222.91	461.093	276.096	0.8009	354.814	0.9818	100708	0.7272	1.67	0.8308	0.7695	0.0047	0.0028	0.5921	0.9889	232.233	226.039	205.41	18.9223	21.6238	22.9646	-1.3433	-1.0737	-0.6971	5.1598	4.1721	3.158	Siirt_Pistachio
92631	1260.75	468.054	255.65	0.8377	343.426	0.9791	94609	0.7977	1.8308	0.7323	0.7337	0.0051	0.0028	0.5384	0.9857	227.343	205.604	179.285	20.945	20.9401	24.537	-1.0416	-0.9487	0.5617	3.3012	3.2423	4.3993	Siirt_Pistachio
79084	1239.11	446.011	227.034	0.8607	317.321	0.978	80866	0.7445	1.9645	0.6473	0.7115	0.0056	0.0029	0.5062	0.9944	208.149	196.159	157.876	16.2556	17.1006	23.7735	-0.9971	-0.415	0.05	3.9778	3.1492	2.8302	Siirt_Pistachio
96001	1209.67	473.995	259.377	0.837	349.617	0.9932	96663	0.7563	1.8274	0.8244	0.7376	0.0049	0.0027	0.5441	0.9942	226.378	219.239	203.145	16.1147	16.9847	16.6886	-1.2168	-1.016	-0.4861	5.4271	4.5036	2.9902	Siirt_Pistachio
103994	1308.55	504.023	263.687	0.8522	363.881	0.985	105579	0.7584	1.9114	0.7632	0.722	0.0048	0.0025	0.5212	0.9963	216.773	212.888	193.981	19.0977	20.8231	22.2524	-1.2077	-1.306	-0.4055	3.9327	4.226	3.5638	Siirt_Pistachio
80972	1121.22	430.223	243.031	0.8252	321.087	0.9711	83385	0.7236	1.7702	0.8094	0.7463	0.0053	0.003	0.557	0.986	232.897	219.404	205.168	24.0184	26.5938	25.0711	-1.0787	-0.7664	-0.5431	3.3572	2.7935	2.3958	Siirt_Pistachio
85950	1240.16	440.127	252.077	0.8197	330.81	0.9672	88869	0.7606	1.746	0.7023	0.7516	0.0051	0.0029	0.5649	0.9864	219.22	204.271	191.458	18.6841	19.1456	17.3674	-1.0709	-0.9505	-0.5993	3.8057	3.4813	3.9724	Siirt_Pistachio
83708	1231.94	444.952	243.72	0.8366	326.466	0.9713	86185	0.7498	1.8257	0.6931	0.7337	0.0053	0.0029	0.5383	0.9828	225.83	217.891	197.383	24.6099	26.8469	25.2336	-0.8879	-0.7354	-0.343	2.8338	2.6699	2.6596	Siirt_Pistachio
98468	1281.74	474.566	264.858	0.8298	354.081	0.9854	99926	0.7473	1.7918	0.7532	0.7461	0.0048	0.0027	0.5567	0.9975	227.773	216.455	195.429	24.2135	23.9411	24.3827	-1.2168	-1.0894	-0.7229	3.7745	3.3821	2.9051	Siirt_Pistachio
88178	1770.28	442.576	266.87	0.7977	335.07	0.9281	95009	0.7341	1.6584	0.3536	0.7571	0.005	0.003	0.5732	0.9506	223.286	216.637	204.476	24.9037	29.2754	22.4374	-0.6939	-0.5994	-0.399	2.503	2.3837	2.3229	Siirt_Pistachio
99319	1336.04	485.266	263.927	0.8392	355.608	0.9805	101299	0.7532	1.8386	0.6992	0.7328	0.0049	0.0027	0.537	0.9874	227.193	216.25	201.883	22.1187	22.9121	21.6546	-0.8848	-0.7789	-0.2702	3.1878	3.0947	2.8396	Siirt_Pistachio
92868	1163.12	435.71	273.126	0.7791	343.865	0.992	93616	0.7304	1.5953	0.8626	0.7892	0.0047	0.0029	0.6228	0.9936	211.169	204.367	186.653	21.1671	21.9591	22.2506	-0.2361	-0.1603	-0.1153	2.3393	2.2724	2.1015	Siirt_Pistachio
108521	1563.88	460.688	306.498	0.7466	371.717	0.956	113510	0.7458	1.5031	0.5576	0.8069	0.0042	0.0028	0.651	0.9786	220.447	212.184	203.813	22.8855	26.216	29.7519	-0.6642	-0.5387	-0.4776	2.6463	2.4237	2.3434	Siirt_Pistachio
86307	2163.01	470.534	267.75	0.8223	331.496	0.8747	98675	0.5767	1.7574	0.2318	0.7045	0.0055	0.0031	0.4963	0.8722	223.448	213.577	200.69	24.3138	26.0073	22.8602	-0.7253	-0.45	-0.3578	2.7435	2.3809	2.2804	Siirt_Pistachio
77386	1956.44	450.482	269.905	0.8006	313.896	0.8211	94245	0.6407	1.669	0.2541	0.6968	0.0058	0.0035	0.4855	0.8104	221.214	212.503	191.815	19.7385	22.2715	22.8989	-0.8457	-0.6675	-0.3808	3.1972	2.8483	2.3848	Siirt_Pistachio
75586	1062.68	418.032	231.141	0.8332	310.224	0.9911	76261	0.7593	1.8086	0.8411	0.7421	0.0055	0.0031	0.5507	0.996	212.526	204.703	182.777	19.2605	19.812	22.0177	-0.9496	-0.617	0.0763	3.1016	2.6315	2.7276	Siirt_Pistachio
99009	1199.35	462.737	275.226	0.8039	355.052	0.994	99611	0.7096	1.6813	0.865	0.7673	0.0047	0.0028	0.5887	0.9898	230.903	227.722	203.911	17.4341	17.2077	18.1613	-1.063	-0.9437	-0.3156	4.9698	4.3928	2.8384	Siirt_Pistachio
90931	1124.24	418.739	277.819	0.7482	340.26	0.9933	91545	0.7387	1.5072	0.9041	0.8126	0.0046	0.0031	0.6603	0.9952	229.048	219.204	201.1	19.3361	18.5227	17.3343	-1.0069	-0.8801	-0.3084	4.5506	4.236	2.6614	Siirt_Pistachio
89272	1173.18	460.255	251.955	0.8369	337.142	0.9641	92598	0.7584	1.8267	0.8151	0.7325	0.0052	0.0028	0.5366	0.9802	233.203	228.601	213.588	24.8214	28.2894	26.6912	-1.1226	-1.0036	-0.8189	3.2845	2.9745	2.79	Siirt_Pistachio
94813	1183.62	457.764	265.025	0.8154	347.447	0.9926	95523	0.7556	1.7272	0.8505	0.759	0.0048	0.0028	0.5761	0.9951	224.64	223.447	211.195	22.1429	23.7926	25.6426	-1.1863	-0.9953	-0.4373	3.6708	3.0796	2.4079	Siirt_Pistachio
90092	1168.91	424.269	272.94	0.7656	338.687	0.9723	92658	0.7482	1.5544	0.8286	0.7983	0.0047	0.003	0.6373	0.9906	224.717	213.385	201.353	20.825	21.3093	24.9081	-0.7455	-0.6517	-0.3559	2.9128	2.8041	2.2712	Siirt_Pistachio
82814	2589.69	441.893	263.926	0.802	324.718	0.8914	92899	0.652	1.6743	0.1552	0.7348	0.0053	0.0032	0.54	0.9041	207.526	196.025	184.796	21.6636	22.501	21.5836	-0.4893	-0.5123	-0.0682	2.3841	2.3445	2.6923	Siirt_Pistachio
94554	1323.19	471.811	262.477	0.831	346.973	0.9611	98382	0.7936	1.7975	0.6786	0.7354	0.005	0.0028	0.5408	0.9721	225.087	215.543	196.022	24.4604	28.1127	23.5773	-0.7245	-0.725	-0.3619	2.4567	2.5058	2.2771	Siirt_Pistachio
105052	1645.71	482.781	289.546	0.8002	365.727	0.9399	111775	0.7191	1.6674	0.4874	0.7575	0.0046	0.0028	0.5739	0.9569	228.123	220.868	206.402	25.7275	29.4452	28.0043	-0.8913	-0.7567	-0.7905	2.8486	2.5817	2.74	Siirt_Pistachio
104872	1330.42	492.244	274.586	0.83	365.414	0.9675	108394	0.7543	1.7927	0.7445	0.7423	0.0047	0.0026	0.5511	0.9879	221.301	211.251	197.626	20.3168	20.7078	19.9043	-1.1297	-0.943	-0.6065	3.9919	3.5275	3.2252	Siirt_Pistachio
93612	1220.07	458.848	260.58	0.8231	345.24	0.9887	94682	0.7801	1.7609	0.7903	0.7524	0.0049	0.0028	0.5661	0.9969	222.911	221.983	213.737	20.9428	22.4895	23.882	-1.2867	-1.0862	-0.7562	4.1708	3.5044	2.7283	Siirt_Pistachio
95548	2225.05	481.343	266.615	0.8326	348.791	0.9202	103838	0.7395	1.8054	0.2425	0.7246	0.005	0.0028	0.5251	0.948	227.434	209.377	196.957	25.0606	27.5177	21.4998	-0.8127	-0.9419	-0.6677	2.6226	2.8589	2.7258	Siirt_Pistachio
97655	1329.36	473.683	264.903	0.829	352.616	0.9721	100459	0.7749	1.7881	0.6944	0.7444	0.0049	0.0027	0.5542	0.9909	216.982	208.615	182.435	19.8402	21.3462	25.7472	-1.0594	-0.9086	-0.1507	3.6032	3.1458	2.9948	Siirt_Pistachio
97806	1301.27	479	263.334	0.8353	352.889	0.9726	100560	0.7663	1.819	0.7258	0.7367	0.0049	0.0027	0.5428	0.9873	225.872	214.873	199.778	24.8107	25.4923	24.8218	-1.0021	-0.9652	-0.6671	3.1573	2.9772	3.0244	Siirt_Pistachio
99690	1210.12	454.666	280.521	0.787	356.271	0.989	100797	0.7117	1.6208	0.8555	0.7836	0.0046	0.0028	0.614	0.9952	226.076	212.782	199.557	20.3165	20.3152	24.3145	-0.9407	-0.9333	-0.5861	3.5236	3.3811	2.6468	Siirt_Pistachio
107831	1380.11	436.339	320.24	0.6792	370.533	0.9619	112106	0.7476	1.3625	0.7114	0.8492	0.004	0.003	0.7211	0.9825	207.517	195.38	185.721	17.9537	20.1639	25.2383	-0.5254	-0.4074	0.6065	2.8228	3.0098	3.7879	Siirt_Pistachio
79562	1198.74	409.623	253.705	0.7851	318.279	0.9695	82063	0.7404	1.6146	0.6958	0.777	0.0051	0.0032	0.6037	0.9748	217.889	202.992	181.031	20.303	21.4176	20.8299	-0.9088	-0.8189	-0.5268	3.0747	2.8608	2.5918	Siirt_Pistachio
92053	2746.77	457.87	295.915	0.7631	342.353	0.8668	106195	0.6856	1.5473	0.1533	0.7477	0.005	0.0032	0.5591	0.865	205.832	195.122	182.419	20.0301	21.6587	17.2652	-0.6356	-0.7026	-0.5779	2.6022	2.7088	3.6492	Siirt_Pistachio
124008	2581.25	535.642	307.19	0.8192	397.356	0.9361	132478	0.6855	1.7437	0.2339	0.7418	0.0043	0.0025	0.5503	0.9596	212.846	201.898	194.993	19.3973	19.8581	19.9412	-0.963	-1.0016	-0.4994	3.2403	3.3782	3.9243	Siirt_Pistachio
88086	2140.54	434.005	280.068	0.7639	334.895	0.9114	96648	0.6344	1.5496	0.2416	0.7716	0.0049	0.0032	0.5954	0.9227	209.711	202.136	193.51	21.1515	25.8794	21.0405	-0.6345	-0.6059	-0.6283	2.5524	2.4059	2.7426	Siirt_Pistachio
81625	1184.32	425.079	248.45	0.8114	322.379	0.9689	84248	0.7731	1.7109	0.7313	0.7584	0.0052	0.003	0.5752	0.9841	213.728	199.854	190.023	20.2763	22.4402	25.1763	-0.974	-0.8378	-0.1972	3.1384	2.7274	3.078	Siirt_Pistachio
70736	1125.76	353.841	256.903	0.6877	300.106	0.9714	72818	0.725	1.3773	0.7014	0.8481	0.005	0.0036	0.7193	0.9908	220.044	207.143	183.745	18.8036	19.0133	20.3343	-0.8466	-0.726	-0.643	3.6807	3.4281	3.0016	Siirt_Pistachio
82086	1965.7	426.461	289.211	0.7349	323.288	0.8634	95078	0.693	1.4746	0.267	0.7581	0.0052	0.0035	0.5747	0.8474	217.338	203.952	179.298	18.712	20.5601	21.5997	-0.7379	-0.719	-0.4133	3.0317	3.1106	2.6686	Siirt_Pistachio
101538	2028.55	450.086	300.922	0.7436	359.558	0.9308	109091	0.708	1.4957	0.3101	0.7989	0.0044	0.003	0.6382	0.9545	215.079	201.054	189.111	20.7685	23.2738	25.6411	-0.318	-0.3286	-0.5147	2.4557	2.3406	3.0896	Siirt_Pistachio
73040	2473.31	465.684	302.664	0.76	304.955	0.6975	104720	0.5385	1.5386	0.15	0.6549	0.0064	0.0041	0.4288	0.6598	210.618	194.106	167.297	20.3598	22.7324	21.4184	-0.3841	-0.4119	-0.3869	2.3635	2.3322	2.2669	Siirt_Pistachio
109620	1279.43	470.063	297.628	0.774	373.594	0.9911	110603	0.7697	1.5794	0.8415	0.7948	0.0043	0.0027	0.6317	0.9976	230.88	226.143	207.846	21.261	21.8038	19.2212	-1.2431	-0.9876	-0.7695	4.47	3.9212	3.3201	Siirt_Pistachio
77579	1171.61	409.945	244.976	0.8018	314.288	0.9626	80590	0.763	1.6734	0.7102	0.7667	0.0053	0.0032	0.5878	0.9836	217.477	194.601	183.24	23.2464	23.9106	22.7461	-0.5374	-0.576	-0.6585	2.0164	2.0066	2.9914	Siirt_Pistachio
62299	2065.3	404.392	221.61	0.8365	281.641	0.8585	72570	0.6691	1.8248	0.1835	0.6965	0.0065	0.0036	0.485	0.8851	230.269	217.839	198.475	24.5055	25.8452	25.0935	-1.0961	-0.9405	-0.9734	3.3086	2.9816	3.2243	Siirt_Pistachio
92363	1283.31	448.357	263.746	0.8087	342.929	0.978	94442	0.7357	1.7	0.7048	0.7649	0.0049	0.0029	0.585	0.9945	234.846	227.405	204.879	23.9599	26.9105	32.7218	-1.3907	-1.1425	-0.858	4.0724	3.438	2.7441	Siirt_Pistachio
83344	1579.48	458.406	239.198	0.8531	325.756	0.9447	88226	0.7224	1.9164	0.4198	0.7106	0.0055	0.0029	0.505	0.9678	228.813	214.57	191.637	21.981	22.1149	23.0911	-0.9144	-0.8955	-0.7928	3.0476	3.0381	3.0333	Siirt_Pistachio
90317	2515.99	489.047	255.865	0.8522	339.109	0.8991	100448	0.7071	1.9113	0.1793	0.6934	0.0054	0.0028	0.4808	0.919	218.446	204.526	179.872	21.2838	21.5447	20.8121	-0.5164	-0.4228	-0.3427	2.6059	2.5677	2.3857	Siirt_Pistachio
84846	1140.07	449.363	241.396	0.8435	328.678	0.9898	85723	0.7474	1.8615	0.8203	0.7314	0.0053	0.0028	0.535	0.9959	222.418	210.459	190.06	18.966	19.158	20.1278	-1.2037	-1.0686	-0.9135	4.056	3.6585	3.332	Siirt_Pistachio
67869	1748.37	403.028	242.836	0.7981	293.962	0.8821	76939	0.6773	1.6597	0.279	0.7294	0.0059	0.0036	0.532	0.8829	212.655	203.13	173.972	20.0561	22.512	25.9095	-0.5532	-0.2957	-0.1108	2.5619	2.332	1.8374	Siirt_Pistachio
104952	1309.2	470.049	295.938	0.7769	365.553	0.9348	112267	0.7297	1.5883	0.7695	0.7777	0.0045	0.0028	0.6048	0.9606	226.964	224.983	210.691	19.5857	23.3758	24.6418	-1.1376	-1.0231	-0.9553	4.1631	3.5007	3.6535	Siirt_Pistachio
86022	1314.34	466.059	246.857	0.8482	330.948	0.93	92493	0.6602	1.888	0.6258	0.7101	0.0054	0.0029	0.5042	0.952	227.89	216.024	194.067	23.0085	24.3962	25.2612	-1.0876	-0.9361	-0.7807	3.2654	2.9218	2.8807	Siirt_Pistachio
98828	1384.48	484.431	261.074	0.8424	354.728	0.9847	100362	0.7856	1.8555	0.6479	0.7323	0.0049	0.0026	0.5362	0.9949	216.491	203.482	177.97	17.7124	18.3559	20.4084	-0.9064	-0.773	-0.0072	3.3986	3.289	3.8841	Siirt_Pistachio
72466	1142.9	411.341	227.908	0.8325	303.754	0.9596	75520	0.7244	1.8049	0.6972	0.7384	0.0057	0.0031	0.5453	0.9842	225.963	213.437	195.687	19.8827	20.047	21.2376	-1.1247	-0.9912	-0.3004	3.9594	3.7176	3.4504	Siirt_Pistachio
75732	1959.22	426.861	271.839	0.771	310.524	0.8196	92401	0.6432	1.5703	0.2479	0.7275	0.0056	0.0036	0.5292	0.831	228.542	217.738	201.773	23.526	26.2401	23.7414	-0.9265	-0.831	-0.5249	3.1429	2.8971	2.5049	Siirt_Pistachio
92765	2088.56	462.198	302.183	0.7567	343.674	0.8718	106412	0.6751	1.5295	0.2672	0.7436	0.005	0.0033	0.5529	0.8457	224.269	217.901	193.68	19.9862	21.638	19.4376	-0.8596	-0.526	-0.1336	3.5219	2.8864	2.6354	Siirt_Pistachio
104138	1752.27	447.655	316.732	0.7067	364.133	0.9179	113448	0.6514	1.4134	0.4262	0.8134	0.0043	0.003	0.6617	0.9352	224.471	210.796	194.975	23.1075	27.0381	19.7011	-0.8086	-0.8528	-0.9762	2.7149	2.5934	3.6424	Siirt_Pistachio
92173	1324.23	493.475	257.175	0.8535	342.576	0.924	99749	0.7063	1.9188	0.6605	0.6942	0.0054	0.0028	0.4819	0.9247	228.441	226.945	218.481	22.4632	24.7164	27.4231	-0.9125	-0.8372	-0.5521	3.3312	3.1115	2.6477	Siirt_Pistachio
91766	1402.02	458.172	259.605	0.824	341.819	0.9581	95776	0.7486	1.7649	0.5867	0.746	0.005	0.0028	0.5566	0.9823	212.723	200.018	183.738	18.736	19.5826	21.3864	-1.0979	-0.9115	0.6096	3.6048	3.3007	5.2032	Siirt_Pistachio
83503	1990.2	449.677	252.093	0.8281	326.066	0.9172	91040	0.7033	1.7838	0.2649	0.7251	0.0054	0.003	0.5258	0.9379	224.063	207.081	174.651	20.6263	20.7961	22.7611	-0.7973	-0.6653	-0.5367	3.056	2.717	3.1033	Siirt_Pistachio
94442	1688.48	444.986	272.598	0.7904	346.767	0.976	96765	0.7442	1.6324	0.4163	0.7793	0.0047	0.0029	0.6073	0.9913	225.724	221.78	202.832	17.8954	20.1713	19.5644	-0.9698	-0.8437	-0.6023	3.8831	3.4738	3.4298	Siirt_Pistachio
72581	1884.7	430.123	229.66	0.8455	303.995	0.9351	77622	0.7234	1.8729	0.2568	0.7068	0.0059	0.0032	0.4995	0.9355	224.914	212.756	191.354	24.0435	27.053	29.7587	-0.5101	-0.2938	-0.4178	2.2685	1.9363	2.0786	Siirt_Pistachio
83504	1148.18	435.527	244.612	0.8274	326.068	0.9878	84535	0.7328	1.7805	0.796	0.7487	0.0052	0.0029	0.5605	0.998	229.853	211.022	185.411	20.3762	19.4736	18.2757	-0.9666	-0.952	-0.5974	3.2346	3.2275	3.2495	Siirt_Pistachio
74588	2208.24	465.061	260.163	0.8289	308.169	0.7857	94927	0.6119	1.7876	0.1922	0.6626	0.0062	0.0035	0.4391	0.7849	223.621	214.935	194.571	19.2327	22.2179	23.283	-0.8972	-0.6678	-0.4636	3.2018	2.6672	2.5327	Siirt_Pistachio
84124	1540.09	424.567	262.079	0.7867	327.277	0.9365	89831	0.7376	1.62	0.4457	0.7708	0.005	0.0031	0.5942	0.9626	221.476	210.95	202.577	22.1782	24.8481	26.3093	-0.8293	-0.7283	-0.5153	2.8524	2.6675	2.5207	Siirt_Pistachio
84710	1382.03	463.583	233.769	0.8635	328.415	0.9774	86669	0.7348	1.9831	0.5573	0.7084	0.0055	0.0028	0.5019	0.9952	226.266	221.583	208.708	19.2719	22.0784	20.8427	-1.2271	-0.9149	-0.8559	4.0621	3.1466	3.1806	Siirt_Pistachio
112405	1324.53	522.296	276.423	0.8485	378.31	0.9838	114251	0.7585	1.8895	0.8051	0.7243	0.0046	0.0025	0.5246	0.9913	225.471	208.078	182.643	18.7246	18.665	17.6031	-1.3265	-1.141	-0.6369	4.7008	3.9807	3.3677	Siirt_Pistachio
83043	2538.24	431.048	269.732	0.78	325.167	0.8798	94393	0.6348	1.5981	0.162	0.7544	0.0052	0.0032	0.5691	0.9094	219.479	205.369	190.335	22.6835	25.1948	22.9497	-0.5069	-0.5146	-0.7089	2.3477	2.3513	3.5388	Siirt_Pistachio
85854	1297	405.949	273.526	0.7389	330.625	0.9571	89706	0.7301	1.4841	0.6413	0.8144	0.0047	0.0032	0.6633	0.9845	204.015	190.219	177.258	15.6408	18.0926	27.9179	-0.4896	-0.0591	0.7855	3.2016	3.167	3.2675	Siirt_Pistachio
93151	1172.61	457.262	261.098	0.8209	344.389	0.9941	93707	0.7048	1.7513	0.8513	0.7532	0.0049	0.0028	0.5672	0.9934	226.416	215.438	195.105	21.5502	22.9573	24.521	-0.8703	-0.8225	-0.7479	2.6938	2.6541	2.8086	Siirt_Pistachio
89860	1214.77	457.44	250.559	0.8366	338.25	0.9898	90787	0.7713	1.8257	0.7652	0.7394	0.0051	0.0028	0.5468	0.9982	224.727	210.651	190.672	22.3664	23.1511	23.8523	-0.9842	-0.8746	-0.6135	3.1073	2.7967	2.5016	Siirt_Pistachio
94177	1656.01	467.089	260.442	0.8301	346.28	0.9668	97415	0.7526	1.7934	0.4315	0.7414	0.005	0.0028	0.5496	0.9857	226.881	214.957	191.963	21.3659	22.4226	22.6766	-1.1953	-1.1172	-0.8352	3.5068	3.3531	3.5717	Siirt_Pistachio
95744	1344.74	486.191	273.942	0.8262	349.149	0.8889	107705	0.728	1.7748	0.6653	0.7181	0.0051	0.0029	0.5157	0.9153	217.226	203.453	183.672	21.7916	25.7564	23.4475	-0.7043	-0.6322	-0.42	2.4659	2.3822	2.2293	Siirt_Pistachio
101208	1277.93	489.236	266.361	0.8388	358.974	0.9845	102805	0.7223	1.8367	0.7788	0.7337	0.0048	0.0026	0.5384	0.9889	231.775	226.716	199.215	23.2303	24.7029	26.2876	-1.3507	-1.1658	-0.9917	4.2295	3.6043	3.1817	Siirt_Pistachio
91533	1915.96	451.737	267.927	0.8051	341.385	0.9395	97432	0.7333	1.686	0.3133	0.7557	0.0049	0.0029	0.5711	0.9629	221.461	208.929	196.477	25.3616	26.7713	21.2822	-0.5585	-0.5588	-0.6219	2.2502	2.2632	2.608	Siirt_Pistachio
90125	1821.6	464.186	255.759	0.8345	338.749	0.9505	94816	0.708	1.8149	0.3413	0.7298	0.0052	0.0028	0.5326	0.9666	228.186	210.542	183.856	23.6857	25.6727	27.1692	-0.6933	-0.5416	-0.2967	2.7018	2.32	1.8648	Siirt_Pistachio
96253	1281.89	474.941	275.013	0.8153	350.076	0.9325	103224	0.6724	1.727	0.7361	0.7371	0.0049	0.0029	0.5433	0.9383	222.21	203.231	186.831	23.5654	26.1931	25.3574	-0.4594	-0.4181	-0.3975	2.3117	2.2484	2.7288	Siirt_Pistachio
88421	2138.69	454.067	285.391	0.7778	335.531	0.8616	102622	0.6509	1.591	0.2429	0.7389	0.0051	0.0032	0.546	0.8688	217.875	202.064	185.918	21.2087	22.0054	18.4202	-0.654	-0.7321	-0.6335	2.6267	2.7446	2.7312	Siirt_Pistachio
79291	1166.02	463.113	218.971	0.8812	317.736	0.9823	80721	0.766	2.1149	0.7329	0.6861	0.0058	0.0028	0.4707	0.9955	213.367	199.652	185.634	15.1675	15.5263	16.7858	-1.2231	-0.8171	-0.2451	5.1146	4.0487	3.671	Siirt_Pistachio
80792	1166.57	449.616	230.33	0.8588	320.73	0.9811	82352	0.7544	1.9521	0.746	0.7133	0.0056	0.0029	0.5089	0.9933	213.826	205.116	202.98	16.8942	17.6686	21.1753	-1.3262	-1.1707	-0.4988	5.0768	4.5644	3.807	Siirt_Pistachio
100658	1199.98	448.787	286.869	0.769	357.997	0.993	101364	0.7231	1.5644	0.8784	0.7977	0.0045	0.0028	0.6363	0.9955	223.386	206.007	183.458	18.7538	18.1278	18.6139	-0.6041	-0.5926	-0.0819	3.0681	3.0866	2.647	Siirt_Pistachio
76331	1127.65	386.079	265.008	0.7272	311.749	0.9502	80330	0.7188	1.4569	0.7543	0.8075	0.0051	0.0035	0.652	0.9499	227.601	210.63	182.677	22.2263	23.0354	22.5407	-0.9421	-0.9236	-0.7844	3.1594	3.007	2.9474	Siirt_Pistachio
77610	2529.51	468.309	275.31	0.8089	314.35	0.7914	98064	0.6101	1.701	0.1524	0.6712	0.006	0.0035	0.4506	0.7664	222.494	212.037	195.055	22.504	23.6684	19.1321	-0.8167	-0.9216	-1.0063	2.8608	3.1027	3.4526	Siirt_Pistachio
94645	2238.14	437.335	298.087	0.7317	347.139	0.9072	104323	0.6587	1.4671	0.2374	0.7938	0.0046	0.0031	0.6301	0.9244	210.393	197.153	175.703	19.5896	21.2223	17.0192	-0.3805	-0.4977	-0.3283	2.7648	2.7488	2.9375	Siirt_Pistachio
78502	1142	430.097	238.919	0.8315	316.152	0.9534	82343	0.7486	1.8002	0.7564	0.7351	0.0055	0.003	0.5403	0.9727	226.195	211.432	188.704	19.2886	20.0153	16.1415	-1.1927	-1.3414	-1.0709	4.1901	4.5471	4.3706	Siirt_Pistachio
100334	1993.05	447.927	298.609	0.7454	357.42	0.9359	107202	0.7714	1.5	0.3174	0.7979	0.0045	0.003	0.6367	0.9551	212.829	198.884	181.492	21.0815	20.849	20.4852	-0.4712	-0.5697	-0.496	2.3522	2.5558	3.6715	Siirt_Pistachio
84808	1248.86	483.301	235.874	0.8728	328.604	0.9318	91015	0.6554	2.049	0.6833	0.6799	0.0057	0.0028	0.4623	0.9472	226.956	216.171	197.884	24.5929	27.2088	24.1025	-0.8437	-0.6485	-0.5002	2.8478	2.5967	2.5924	Siirt_Pistachio
84968	1354.77	474.96	236.157	0.8676	328.914	0.9371	90671	0.727	2.0112	0.5818	0.6925	0.0056	0.0028	0.4796	0.9645	224.321	213.431	194.976	26.5784	28.9712	31.9745	-0.7932	-0.7167	-0.8233	2.4087	2.2643	2.7628	Siirt_Pistachio
88906	1175.35	440.601	258.594	0.8096	336.45	0.9854	90221	0.7665	1.7038	0.8087	0.7636	0.005	0.0029	0.5831	0.9935	218.036	206.786	192.798	16.9527	18.1367	21.8391	-1.1016	-0.8035	-0.029	4.1032	3.7287	3.6999	Siirt_Pistachio
81027	1084.52	417.049	248.285	0.8035	321.196	0.9927	81623	0.7683	1.6797	0.8657	0.7702	0.0051	0.0031	0.5932	0.9963	219.95	209.756	189.715	22.8416	22.1863	21.4092	-0.9521	-0.8369	-0.6897	2.7354	2.5845	2.6303	Siirt_Pistachio
82744	2236.54	456.352	244.885	0.8438	324.581	0.92	89937	0.7185	1.8635	0.2079	0.7113	0.0055	0.003	0.5059	0.9427	229.835	216.222	200.509	25.0789	26.8127	26.232	-0.9767	-0.8791	-0.773	2.8715	2.712	3.0126	Siirt_Pistachio
86534	1176.66	439.883	258.351	0.8094	331.932	0.9545	90662	0.745	1.7027	0.7854	0.7546	0.0051	0.003	0.5694	0.9695	231.316	215.222	198.391	23.1366	26.2147	26.1109	-1.0714	-1.0526	-0.8545	3.2737	3.152	2.6281	Siirt_Pistachio
96825	1296.36	491.175	270.524	0.8347	351.115	0.9026	107270	0.7302	1.8156	0.724	0.7148	0.0051	0.0028	0.511	0.9278	227.833	220.51	201.686	24.1314	28.1294	25.7004	-0.947	-0.8281	-0.5936	3.0387	2.8038	2.4966	Siirt_Pistachio
85841	1186.51	466.222	239.959	0.8574	330.6	0.9704	88463	0.7551	1.9429	0.7662	0.7091	0.0054	0.0028	0.5028	0.977	213.209	213.653	206.6	21.3888	23.4678	24.2364	-0.914	-0.8522	-0.5226	3.0186	2.8281	2.5762	Siirt_Pistachio
103155	1304.5	498.467	270.875	0.8395	362.41	0.954	108134	0.7631	1.8402	0.7617	0.727	0.0048	0.0026	0.5286	0.9727	229.26	224.796	208.386	23.5957	25.7307	23.2652	-0.9023	-0.7695	-0.4939	3.0926	2.8409	2.7458	Siirt_Pistachio
100409	1219.52	467.782	275.798	0.8077	357.554	0.992	101215	0.7639	1.6961	0.8484	0.7644	0.0047	0.0027	0.5842	0.9909	222.362	218.283	198.553	21.4507	22.332	21.2842	-0.2378	-0.2586	-0.165	2.323	2.4125	2.8487	Siirt_Pistachio
82939	1166.26	436.499	244.9	0.8278	324.963	0.9861	84111	0.7453	1.7824	0.7663	0.7445	0.0053	0.003	0.5542	0.9879	231.642	221.348	204.38	19.001	20.2542	21.3306	-1.5277	-1.2577	-0.5725	5.3363	4.5119	3.9617	Siirt_Pistachio
78879	2580.94	452.566	254.449	0.827	316.91	0.8887	88762	0.6982	1.7786	0.1488	0.7003	0.0057	0.0032	0.4904	0.8721	210.129	199.108	176.404	19.3204	21.3047	17.683	-0.5054	-0.5939	-0.314	2.7276	2.8766	2.8613	Siirt_Pistachio
92902	1569.42	454.728	264.479	0.8135	343.928	0.9657	96199	0.7548	1.7193	0.474	0.7563	0.0049	0.0028	0.572	0.9835	234.195	228.968	213.089	21.8686	23.6452	23.8524	-1.4474	-1.3072	-0.9068	4.7697	4.229	3.2619	Siirt_Pistachio
85436	1072.37	388.107	281.591	0.6882	329.819	0.9932	86021	0.7491	1.3783	0.9336	0.8498	0.0045	0.0033	0.7222	0.9954	219.656	214.383	204.62	23.0309	24.1764	23.2502	-0.3819	-0.2363	-0.1015	2.1887	2.0862	2.0098	Siirt_Pistachio
97016	1251.11	454.219	278.721	0.7896	351.461	0.9538	101717	0.7578	1.6297	0.7789	0.7738	0.0047	0.0029	0.5987	0.9757	230.565	228.009	216.325	24.6884	28.357	28.0047	-1.0072	-0.9518	-0.6799	3.0041	2.8561	2.4176	Siirt_Pistachio
86209	1154.54	429.748	255.843	0.8035	331.308	0.9904	87043	0.7687	1.6797	0.8127	0.7709	0.005	0.003	0.5943	0.9983	225.615	218.855	202.851	19.8406	19.9869	16.0489	-1.0055	-0.8137	-0.4067	3.6884	3.111	2.8899	Siirt_Pistachio
84839	2476.24	464.702	251.137	0.8414	328.664	0.9127	92958	0.7131	1.8504	0.1739	0.7073	0.0055	0.003	0.5002	0.9256	221.87	208.06	187.917	24.5884	26.2968	20.5075	-0.644	-0.5861	-0.3186	2.3268	2.3211	2.3813	Siirt_Pistachio
80039	2340.46	436.474	272.235	0.7817	319.232	0.8573	93362	0.6467	1.6033	0.1836	0.7314	0.0055	0.0034	0.5349	0.8576	226.487	219.845	198.748	24.4671	26.7303	21.802	-0.9674	-0.8372	-0.4153	3.0915	3.0001	2.5566	Siirt_Pistachio
98475	1315.56	483.508	268.058	0.8322	354.094	0.9504	103618	0.759	1.8037	0.715	0.7323	0.0049	0.0027	0.5363	0.9674	229.818	221.667	209.609	23.5051	27.3275	22.3575	-1.0491	-1.0563	-0.6642	3.2953	3.4002	2.6592	Siirt_Pistachio
84944	1162.72	420.212	261.095	0.7835	328.868	0.9639	88125	0.7583	1.6094	0.7896	0.7826	0.0049	0.0031	0.6125	0.9858	223.026	215.97	209.225	22.2731	25.0886	23.5686	-0.8736	-0.7657	-0.6129	3.2868	2.9226	2.6169	Siirt_Pistachio
82442	2455.75	452.913	274.146	0.796	323.988	0.86	95865	0.6383	1.6521	0.1718	0.7153	0.0055	0.0033	0.5117	0.8454	218.242	205.793	186.256	19.7795	18.841	15.7228	-0.933	-0.9331	-0.2419	3.3328	3.6203	3.1111	Siirt_Pistachio
102311	2161.67	485.46	279.356	0.8178	360.924	0.941	108725	0.7232	1.7378	0.2751	0.7435	0.0047	0.0027	0.5527	0.9606	232.259	221.375	212.924	22.561	27.1639	23.9396	-1.0616	-0.9499	-0.9458	3.4018	3.01	3.2179	Siirt_Pistachio
81632	1302	445.491	235.259	0.8492	322.393	0.9739	83820	0.7546	1.8936	0.6051	0.7237	0.0055	0.0029	0.5237	0.9917	228.576	227.821	203.746	24.6069	28.5761	32.1201	-0.9505	-0.8817	-0.6761	2.8746	2.5092	2.2425	Siirt_Pistachio
88111	2569.48	420.859	289.307	0.7263	334.942	0.9184	95937	0.7422	1.4547	0.1677	0.7959	0.0048	0.0033	0.6334	0.9214	227.932	218.75	206.646	24.3957	27.1732	23.8605	-0.8759	-0.7598	-0.3841	2.9475	2.9187	2.4094	Siirt_Pistachio
90270	1370.54	428.964	269.823	0.7774	339.021	0.9722	92847	0.74	1.5898	0.6039	0.7903	0.0048	0.003	0.6246	0.993	218.113	204.969	188.344	24.1201	24.1158	24.4946	-0.7733	-0.5524	-0.251	2.5706	2.3457	2.3167	Siirt_Pistachio
99297	1365.8	475.048	269.578	0.8234	355.568	0.9854	100769	0.7223	1.7622	0.6689	0.7485	0.0048	0.0027	0.5602	0.9872	228.316	215.26	192.105	17.7389	17.1005	17.1165	-1.0627	-0.7796	-0.1242	5.1209	5.071	3.6176	Siirt_Pistachio
90627	1157.04	448.35	258.712	0.8167	339.691	0.9861	91901	0.7904	1.733	0.8507	0.7576	0.0049	0.0029	0.574	0.9948	213.078	201.575	187.553	20.0585	20.0896	18.5497	-0.736	-0.5898	-0.4355	2.4143	2.331	2.6656	Siirt_Pistachio
85250	1989.5	448.346	271.503	0.7958	329.46	0.8892	95870	0.709	1.6513	0.2707	0.7348	0.0053	0.0032	0.54	0.8917	217.213	216.519	196.075	21.1087	22.994	29.0275	-1.0395	-0.9284	-0.8796	3.5031	3.1707	3.072	Siirt_Pistachio
91103	1270.08	480.812	242.137	0.8639	340.582	0.9825	92724	0.7605	1.9857	0.7097	0.7083	0.0053	0.0027	0.5018	0.9963	212.947	202.655	183.482	19.4041	20.2359	21.6161	-0.7276	-0.4217	0.097	3.0975	2.8002	2.9313	Siirt_Pistachio
94511	2069.55	463.567	275.816	0.8037	346.894	0.9229	102404	0.7212	1.6807	0.2773	0.7483	0.0049	0.0029	0.56	0.9412	229.638	222.565	200.595	25.9498	28.1201	24.6318	-1.1573	-1.0479	-0.9255	3.1673	2.8963	2.8702	Siirt_Pistachio
83005	1122.78	414.81	255.936	0.787	325.093	0.9874	84064	0.726	1.6208	0.8274	0.7837	0.005	0.0031	0.6142	0.9955	222.956	215.394	213.867	23.7483	24.6902	24.263	-1.1428	-1.0472	-0.8865	3.4781	3.1909	3.02	Siirt_Pistachio
84775	2203.36	460.104	280.162	0.7932	328.541	0.8533	99355	0.6691	1.6423	0.2194	0.7141	0.0054	0.0033	0.5099	0.8374	219.253	207.284	194.681	22.7473	25.0642	25.1484	-0.7102	-0.5843	-0.386	2.7853	2.48	2.1277	Siirt_Pistachio
72602	2734.14	462.592	236.962	0.8588	304.039	0.8461	85808	0.608	1.9522	0.122	0.6573	0.0064	0.0033	0.432	0.8433	217.496	209.424	192.924	22.1977	24.3164	19.4534	-0.969	-0.7739	-0.5383	3.0005	2.7259	2.4511	Siirt_Pistachio
82463	2182.4	444.55	282.181	0.7727	324.029	0.8725	94513	0.6909	1.5754	0.2176	0.7289	0.0054	0.0034	0.5313	0.837	214.856	204.535	182.232	21.8543	22.3779	20.4214	-0.6043	-0.6415	-0.6063	2.5612	2.6954	2.3619	Siirt_Pistachio
74756	1106.54	373.238	256.211	0.7272	308.516	0.9772	76502	0.7633	1.4568	0.7672	0.8266	0.005	0.0034	0.6833	0.9953	216.914	200.5	176.619	20.1011	19.5255	18.108	-1.0518	-1.0385	-0.667	3.0762	3.0766	2.9934	Siirt_Pistachio
92622	1246.81	440.518	274.956	0.7813	343.409	0.9469	97815	0.7474	1.6021	0.7487	0.7796	0.0048	0.003	0.6077	0.9736	214.275	201.952	187.7	22.2758	24.276	21.2102	-0.5595	-0.5248	-0.6329	2.3393	2.2999	2.8516	Siirt_Pistachio
80701	1240.08	417.409	250.957	0.7991	320.549	0.9586	84184	0.7698	1.6633	0.6595	0.7679	0.0052	0.0031	0.5897	0.9809	211.54	199.111	180.597	16.6443	17.4279	20.3543	-1.1381	-1.1054	-0.3114	3.7889	3.655	3.5996	Siirt_Pistachio
76093	1138.88	424.514	244.291	0.8178	311.263	0.9335	81516	0.6189	1.7377	0.7372	0.7332	0.0056	0.0032	0.5376	0.9342	218.818	208.858	201.917	24.1784	24.8029	24.6717	-0.5533	-0.5077	-0.2385	2.4098	2.5484	2.2107	Siirt_Pistachio
85339	1373.15	441.409	247.78	0.8276	329.632	0.9743	87589	0.7246	1.7815	0.5688	0.7468	0.0052	0.0029	0.5577	0.9935	197.566	183.912	164.421	15.897	15.7996	15.3088	-0.376	-0.2035	0.288	2.3035	2.1663	2.3608	Siirt_Pistachio
70508	1172.83	415.494	217.72	0.8517	299.622	0.9759	72251	0.7533	1.9084	0.6441	0.7211	0.0059	0.0031	0.52	0.9924	204.41	189.953	177.547	14.2959	16.1697	17.3264	-0.8327	-0.6292	0.2552	3.8086	3.474	4.2282	Siirt_Pistachio
66318	1910.41	415.219	240.657	0.8149	290.583	0.8513	77900	0.6505	1.7254	0.2283	0.6998	0.0063	0.0036	0.4898	0.845	203.474	190.021	172.88	18.0488	18.5928	14.5252	-0.5942	-0.5821	-0.3961	2.393	2.3367	2.5645	Siirt_Pistachio
90038	1285.99	455.413	253.31	0.831	338.585	0.9763	92227	0.7398	1.7978	0.6842	0.7435	0.0051	0.0028	0.5527	0.9938	205.585	190.389	168.221	15.2343	14.9883	14.6975	-0.7691	-0.6697	-0.4276	3.3007	3.2292	2.5555	Siirt_Pistachio
79846	1376.29	472.979	219	0.8863	318.846	0.9537	83726	0.7815	2.1597	0.5297	0.6741	0.0059	0.0027	0.4544	0.9815	195.086	182.597	161.975	14.0926	13.6703	12.2711	-0.4569	-0.2871	-0.1617	2.5068	2.4233	3.5325	Siirt_Pistachio
70893	1603.61	404.635	244.24	0.7973	300.439	0.87	81485	0.6574	1.6567	0.3464	0.7425	0.0057	0.0034	0.5513	0.9133	200.349	188.168	176.733	17.2408	17.9652	18.492	-0.3877	-0.314	0.2516	2.5641	2.5554	2.969	Siirt_Pistachio
60571	1894.29	389.932	239.631	0.7889	277.707	0.8091	74866	0.5966	1.6272	0.2121	0.7122	0.0064	0.004	0.5072	0.8254	200.675	186.164	173.02	14.7231	16.348	13.7638	-0.5893	-0.5883	-0.7915	2.5759	2.533	2.9214	Siirt_Pistachio
85098	1326.61	453.302	243.177	0.8439	329.166	0.9524	89350	0.7455	1.8641	0.6076	0.7262	0.0053	0.0029	0.5273	0.9829	210.708	196.745	181.999	16.4045	18.4752	20.8144	-0.788	-0.7104	-0.8668	3.166	2.9985	3.3167	Siirt_Pistachio
91730	1232.9	465.671	252.973	0.8396	341.752	0.9883	92814	0.7707	1.8408	0.7583	0.7339	0.0051	0.0028	0.5386	0.9914	212.784	200.483	189.453	18.8858	20.3529	20.2074	-0.7804	-0.6467	-0.5323	2.6695	2.4136	2.4399	Siirt_Pistachio
106514	1405.65	473.154	291.661	0.7874	368.263	0.9651	110364	0.7885	1.6223	0.6774	0.7783	0.0044	0.0027	0.6058	0.9827	217.356	211.693	210.304	21.112	23.6074	21.2321	-0.6046	-0.4038	-0.1678	2.8379	2.5438	2.4225	Siirt_Pistachio
82728	1541.52	424.843	251.267	0.8064	324.55	0.9646	85765	0.7249	1.6908	0.4375	0.7639	0.0051	0.003	0.5836	0.9867	199.703	186.854	177.32	16.0757	16.8168	16.8683	-0.193	0.0875	0.7187	2.6492	2.7498	4.0552	Siirt_Pistachio
69640	1018.38	398.945	222.9	0.8294	297.772	0.9903	70321	0.7113	1.7898	0.8438	0.7464	0.0057	0.0032	0.5571	0.9971	221.327	219.509	207.839	20.037	20.8458	19.8214	-1.1731	-1.0856	-0.773	3.8879	3.6092	3.1704	Siirt_Pistachio
95119	2062.67	450.633	282.316	0.7794	348.008	0.9272	102589	0.738	1.5962	0.2809	0.7723	0.0047	0.003	0.5964	0.952	223.91	206.066	185.74	19.3747	19.464	18.2947	-1.0513	-0.9925	-0.8485	3.5252	3.4301	3.179	Siirt_Pistachio
79209	1251.63	391.536	262.65	0.7416	317.572	0.9624	82300	0.6968	1.4907	0.6354	0.8111	0.0049	0.0033	0.6579	0.9807	207.342	192.293	187.799	18.175	20.3796	17.485	-0.1681	0.3133	0.49	3.1489	3.035	3.2187	Siirt_Pistachio
87341	1223.04	463.329	241.191	0.8538	333.476	0.9803	89097	0.8083	1.921	0.7337	0.7197	0.0053	0.0028	0.518	0.9951	217.799	212.286	199.919	21.6916	23.9353	27.6006	-0.9703	-0.7734	-0.6122	3.0166	2.6659	2.5587	Siirt_Pistachio
110303	1546.77	457.527	313.002	0.7294	374.756	0.9641	114405	0.7794	1.4617	0.5794	0.8191	0.0041	0.0028	0.6709	0.9807	222.993	217.253	211.717	20.087	23.1995	22.5114	-0.7834	-0.6635	-0.3345	3.2417	2.8942	2.7037	Siirt_Pistachio
90360	1305.96	445.858	259.071	0.8139	339.19	0.9824	91980	0.7703	1.721	0.6658	0.7608	0.0049	0.0029	0.5788	0.996	219.939	209.589	199.179	20.1927	20.3757	19.3256	-0.9127	-0.8282	0.006	3.2277	3.074	3.5685	Siirt_Pistachio
97942	1295.59	483.256	259.926	0.843	353.134	0.9751	100441	0.7674	1.8592	0.7332	0.7307	0.0049	0.0027	0.534	0.9928	225.288	210.877	197.758	20.3224	20.5114	20.737	-1.1069	-1.0788	-0.6999	3.8808	3.7881	3.9258	Siirt_Pistachio
106614	2191.05	496.106	285.366	0.818	368.436	0.9444	112889	0.7441	1.7385	0.2791	0.7427	0.0047	0.0027	0.5515	0.9588	227.202	221.512	206.682	23.9502	27.1265	19.9256	-0.7954	-0.9125	-0.2319	2.7861	3.1344	2.6003	Siirt_Pistachio
87349	1146.32	412.414	272.798	0.75	333.491	0.982	88950	0.7682	1.5118	0.8353	0.8086	0.0047	0.0031	0.6539	0.9885	228.752	222.151	202.323	23.6697	23.5397	23.4953	-0.9929	-0.884	-0.7117	3.1218	2.9415	2.9762	Siirt_Pistachio
105631	1251.15	483.749	280.889	0.8142	366.734	0.9923	106450	0.6845	1.7222	0.848	0.7581	0.0046	0.0027	0.5747	0.9898	218.495	212.371	194.96	18.2314	18.327	18.1738	-0.6732	-0.4892	-0.1533	3.3262	2.9225	2.6364	Siirt_Pistachio
90674	1205.55	463.246	250.596	0.8411	339.779	0.9816	92375	0.7658	1.8486	0.784	0.7335	0.0051	0.0028	0.538	0.9945	227.409	220.551	198.959	21.3431	22.0148	20.8738	-1.0472	-0.9344	-0.8426	3.3357	3.0209	3.077	Siirt_Pistachio
89823	1266.8	450.179	264.633	0.809	338.181	0.9356	96010	0.717	1.7011	0.7034	0.7512	0.005	0.0029	0.5643	0.96	222.922	214.806	203.035	25.0487	31.9203	24.6749	-0.552	-0.5527	-0.1779	2.1875	2.0184	2.0262	Siirt_Pistachio
89084	2043.23	424.615	284.725	0.7419	336.787	0.9113	97758	0.7534	1.4913	0.2681	0.7932	0.0048	0.0032	0.6291	0.9382	219.554	204.373	197.137	21.2523	22.6418	19.728	-0.7327	-0.7323	-0.9617	2.9888	2.766	3.7567	Siirt_Pistachio
94816	1210.53	486.33	253.075	0.8539	347.453	0.984	96354	0.7289	1.9217	0.8131	0.7144	0.0051	0.0027	0.5104	0.9809	227.199	226.458	206.839	22.6076	23.1712	23.3388	-0.7942	-0.6896	-0.5448	2.8847	2.7248	2.6652	Siirt_Pistachio
98290	2058.98	437.237	303.091	0.7207	353.761	0.928	105919	0.738	1.4426	0.2914	0.8091	0.0044	0.0031	0.6546	0.9443	221.112	211.438	199.97	25.8348	29.2799	22.9444	-0.5115	-0.4289	-0.4125	2.2462	2.1912	2.679	Siirt_Pistachio
84198	2138.27	456.435	253.332	0.8318	327.421	0.9122	92301	0.6809	1.8017	0.2314	0.7173	0.0054	0.003	0.5146	0.9271	224.481	220.967	211.856	25.728	30.6178	22.6609	-0.7774	-0.7922	-0.4743	2.4863	2.5874	2.537	Siirt_Pistachio
87051	1207.61	425.294	275.821	0.7612	332.922	0.9368	92926	0.6308	1.5419	0.7501	0.7828	0.0049	0.0032	0.6128	0.9449	220.949	213.32	205.404	23.7324	29.4805	19.9014	-0.6554	-0.7977	-0.3291	2.5848	2.7527	2.6082	Siirt_Pistachio
99449	1200.6	456.698	279.805	0.7903	355.84	0.9803	101447	0.7192	1.6322	0.867	0.7792	0.0046	0.0028	0.6071	0.9909	230.837	221.396	214.194	22.7289	22.3229	22.8661	-1.1014	-0.9161	-0.6061	3.7211	3.221	2.7233	Siirt_Pistachio
96452	1199.71	458.116	271.439	0.8056	350.438	0.9716	99270	0.7725	1.6877	0.8421	0.765	0.0047	0.0028	0.5852	0.9876	227.167	216.659	202.719	21.3042	20.6489	19.9409	-1.3075	-1.0412	0.1685	4.0449	3.4322	3.5937	Siirt_Pistachio
88465	1134.16	448.456	252.524	0.8264	335.615	0.9935	89044	0.7494	1.7759	0.8642	0.7484	0.0051	0.0029	0.5601	0.9946	225.513	220.06	206.027	19.1958	19.3159	18.7897	-0.8147	-0.6384	0.0275	3.3008	2.8509	2.6365	Siirt_Pistachio
93543	1556.74	467.683	266.836	0.8213	345.113	0.9359	99955	0.7561	1.7527	0.4851	0.7379	0.005	0.0029	0.5445	0.9544	213.881	209.634	198.799	21.3549	26.1632	21.0933	-0.4226	-0.3068	-0.0241	2.316	2.2155	2.2118	Siirt_Pistachio
95011	1236.04	441.588	281.965	0.7696	347.81	0.96	98973	0.7412	1.5661	0.7815	0.7876	0.0046	0.003	0.6204	0.9716	229.17	220.921	213.495	24.63	26.3053	24.9542	-1.054	-0.9965	-0.7573	3.0601	2.8943	2.9435	Siirt_Pistachio
79307	1147.15	425.399	249.925	0.8092	317.769	0.935	84816	0.6384	1.7021	0.7573	0.747	0.0054	0.0032	0.558	0.9498	227.403	218.122	209.278	25.4335	29.678	25.1773	-0.852	-0.8082	-0.6873	2.7137	2.5989	2.591	Siirt_Pistachio
97686	2266.39	474.384	292.368	0.7875	352.672	0.8989	108671	0.6967	1.6226	0.239	0.7434	0.0049	0.003	0.5527	0.8968	219.905	212.823	198.637	22.3988	26.4421	23.9589	-0.7664	-0.7289	-0.1896	2.824	2.7734	1.9657	Siirt_Pistachio
101987	2245.01	480.526	282.397	0.8091	360.352	0.9446	107963	0.7172	1.7016	0.2543	0.7499	0.0047	0.0028	0.5624	0.9569	221.15	209.116	197.119	22.8579	23.0798	21.0765	-0.9277	-0.8582	-0.2176	2.8299	2.701	3.2107	Siirt_Pistachio
88683	1623.54	457.36	275.401	0.7984	336.028	0.8623	102844	0.6646	1.6607	0.4228	0.7347	0.0052	0.0031	0.5398	0.8965	210.126	201.017	197.72	24.8322	27.7002	23.8501	-0.12	-0.1396	-0.0528	1.8381	1.841	2.0076	Siirt_Pistachio
97474	1891.67	472.691	270.924	0.8194	352.289	0.9475	102878	0.7669	1.7447	0.3423	0.7453	0.0048	0.0028	0.5554	0.9691	218.245	211.57	203.962	20.841	22.23	19.2681	-0.9836	-0.8991	-0.5071	3.1751	2.9496	2.9566	Siirt_Pistachio
101830	1654.69	482.06	276.097	0.8197	360.075	0.9356	108843	0.726	1.746	0.4674	0.747	0.0047	0.0027	0.5579	0.9741	220.558	212.151	202.543	23.6565	24.3066	17.8233	-0.5975	-0.5183	-0.4014	2.6194	2.4519	2.4861	Siirt_Pistachio
90638	1165.73	466.558	248.924	0.8458	339.712	0.9889	91658	0.7516	1.8743	0.8382	0.7281	0.0051	0.0027	0.5302	0.9937	225.329	218.703	205.414	20.7125	21.755	19.4298	-1.1507	-0.8663	-0.2925	3.6075	2.9273	2.7612	Siirt_Pistachio
104783	1258.23	507.162	264.801	0.8529	365.259	0.9934	105481	0.752	1.9153	0.8317	0.7202	0.0048	0.0025	0.5187	0.9934	214.406	212.074	207.296	18.1667	17.4473	14.1909	-0.498	-0.4276	-0.353	2.6704	2.6681	2.6755	Siirt_Pistachio
84923	1199.22	469.33	232.025	0.8692	328.827	0.9816	86519	0.6558	2.0228	0.7421	0.7006	0.0055	0.0027	0.4909	0.9929	223.616	221.599	213.959	21.2477	22.4891	22.9599	-1.1784	-0.9764	-0.7704	3.8433	3.2281	2.6371	Siirt_Pistachio
95819	1201.66	472.671	258.561	0.8371	349.286	0.9879	96989	0.7603	1.8281	0.8339	0.739	0.0049	0.0027	0.5461	0.9983	224.107	217.097	199.141	18.4414	18.4196	16.1929	-1.3022	-1.2111	-0.8832	4.6558	4.3587	3.94	Siirt_Pistachio
76256	1479.57	422.198	249.202	0.8072	311.596	0.9147	83363	0.7071	1.6942	0.4377	0.738	0.0055	0.0033	0.5447	0.9228	212.366	201.83	201.2	22.1324	26.5633	21.9058	-0.2611	-0.2583	-0.0827	2.1214	1.9574	1.8386	Siirt_Pistachio
81267	1095.21	427.222	244.715	0.8197	321.671	0.9931	81834	0.7363	1.7458	0.8514	0.7529	0.0053	0.003	0.5669	0.9897	221.423	215.532	204.685	17.2444	16.7899	14.0778	-0.8847	-0.8592	-0.3492	4.2729	4.1289	4.1676	Siirt_Pistachio
91594	2203.26	463.452	264.546	0.8211	341.498	0.9367	97782	0.7464	1.7519	0.2371	0.7369	0.0051	0.0029	0.543	0.9512	218.478	211.592	201.352	23.4374	26.8359	20.5478	-0.5273	-0.5201	0.0664	2.3416	2.358	2.4436	Siirt_Pistachio
72587	1089.32	404.806	241.271	0.803	304.008	0.9255	78430	0.7322	1.6778	0.7687	0.751	0.0056	0.0033	0.564	0.9463	220.451	214.446	202.752	21.7921	24.6584	18.7923	-1.053	-0.8878	-0.6786	3.3888	3.0919	2.6838	Siirt_Pistachio
105901	1342.9	502.054	273.52	0.8386	367.202	0.9626	110019	0.7318	1.8355	0.7379	0.7314	0.0047	0.0026	0.5349	0.9819	229.345	219.352	207.306	24.8266	25.6888	21.8356	-0.7531	-0.686	-0.655	2.547	2.5187	2.5509	Siirt_Pistachio
76437	1181.92	457.797	216.424	0.8812	311.966	0.9707	78747	0.5818	2.1153	0.6876	0.6814	0.006	0.0028	0.4644	0.9823	210.68	202.005	184.843	16.8499	16.6859	14.108	-1.0012	-0.8286	-0.7193	3.622	3.3804	3.1409	Siirt_Pistachio
92504	1344.24	464.928	255.693	0.8352	343.191	0.9685	95514	0.6751	1.8183	0.6433	0.7382	0.005	0.0028	0.5449	0.9908	209.673	199.838	186.973	17.4228	16.9651	14.3573	-0.8229	-0.8602	-0.452	2.9693	2.9152	3.6155	Siirt_Pistachio
82668	1208.69	435.65	242.665	0.8305	324.432	0.9791	84435	0.6522	1.7953	0.7111	0.7447	0.0053	0.0029	0.5546	0.9956	216.855	208.025	197.09	21.7776	23.1187	23.3139	-0.6402	-0.5813	-0.6266	2.6324	2.4801	2.5889	Siirt_Pistachio
97587	1485.16	484.885	260.829	0.843	352.493	0.9492	102813	0.6696	1.859	0.556	0.727	0.005	0.0027	0.5285	0.9824	208.951	197.487	191.512	16.9132	17.7136	18.1466	-0.7967	-0.677	-0.2088	2.9066	2.6462	2.8187	Siirt_Pistachio
94328	1187.5	468.946	257.954	0.8351	346.558	0.9863	95643	0.7801	1.8179	0.8406	0.739	0.005	0.0027	0.5461	0.9929	231.607	222.547	209.292	22.3011	23.8048	19.834	-1.0992	-1.046	-0.8513	3.4353	3.3053	3.3169	Siirt_Pistachio
82074	1908.74	394.289	286.966	0.6858	323.264	0.9127	89920	0.7167	1.374	0.2831	0.8199	0.0048	0.0035	0.6722	0.9236	207.329	195.226	184.621	19.4634	20.4568	17.2975	-0.3882	-0.246	-0.0581	2.3421	2.3046	2.272	Siirt_Pistachio
91246	1285.02	452.909	257.401	0.8228	340.849	0.9818	92938	0.6681	1.7595	0.6944	0.7526	0.005	0.0028	0.5664	0.9966	227.689	223.685	200.79	21.1746	22.0083	16.1659	-1.2142	-1.0458	-0.6541	3.9728	3.6851	2.9421	Siirt_Pistachio
101482	1271.81	483.565	269.141	0.8308	359.459	0.9897	102538	0.6833	1.7967	0.7884	0.7434	0.0048	0.0027	0.5526	0.9928	223.38	220.023	204.346	20.7911	21.483	22.5561	-1.0197	-0.8743	-0.5678	3.2666	2.96	2.3884	Siirt_Pistachio
73590	1088.73	419.19	224.427	0.8446	306.101	0.9842	74769	0.6997	1.8678	0.7802	0.7302	0.0057	0.003	0.5332	0.996	225.118	221.513	201.918	22.1233	23.2189	20.8119	-0.9293	-0.768	-0.573	3.1973	2.8239	2.6426	Siirt_Pistachio
79984	1119.15	422.682	241.74	0.8203	319.122	0.9884	80923	0.7116	1.7485	0.8025	0.755	0.0053	0.003	0.57	0.9967	223.699	212.093	188.639	19.7684	18.4363	18.4946	-1.0758	-0.9684	-0.5292	3.7827	3.5873	2.3896	Siirt_Pistachio
80425	1099.2	432.303	238.821	0.8336	320	0.989	81322	0.7421	1.8102	0.8365	0.7402	0.0054	0.003	0.5479	0.9918	213.251	211.332	208.604	14.8161	15.7009	14.6922	-1.0207	-0.7736	-0.1857	4.5119	3.8852	3.0712	Siirt_Pistachio
85994	1146.31	451.93	242.74	0.8435	330.894	0.9905	86823	0.78	1.8618	0.8224	0.7322	0.0053	0.0028	0.5361	0.9981	230.646	223.741	210.724	21.667	22.9422	25.0398	-1.1689	-1.0535	-0.9184	3.6564	3.1584	3.0188	Siirt_Pistachio
85876	1153.94	457.101	240.745	0.8501	330.667	0.9919	86580	0.7176	1.8987	0.8104	0.7234	0.0053	0.0028	0.5233	0.9936	229.889	221.564	204.261	19.9682	19.5865	17.8535	-1.1805	-0.9697	-0.1018	3.9352	3.3562	3.2455	Siirt_Pistachio
99259	1248.68	496.089	255.606	0.857	355.5	0.9905	100206	0.6827	1.9408	0.8	0.7166	0.005	0.0026	0.5135	0.9967	213.85	210.573	202.149	16.8667	16.8154	15.4944	-1.134	-0.9774	-0.2519	3.7774	3.381	3.05	Siirt_Pistachio
71781	1026.91	392.748	233.811	0.8035	302.315	0.9909	72443	0.79	1.6798	0.8554	0.7697	0.0055	0.0033	0.5925	0.9953	219.956	218.819	217.573	17.2532	17.4337	16.6076	-1.3827	-1.2463	-0.5148	5.0054	4.5288	3.2508	Siirt_Pistachio
81460	1850.02	399.952	279.819	0.7145	322.053	0.9059	89923	0.6371	1.4293	0.2991	0.8052	0.0049	0.0034	0.6484	0.9268	210.644	197.537	177.904	19.7996	20.2985	15.277	-0.6168	-0.6302	-0.4249	2.4245	2.5169	3.078	Siirt_Pistachio
85178	2043.08	462.069	247.935	0.8439	329.32	0.9123	93367	0.7118	1.8637	0.2564	0.7127	0.0054	0.0029	0.508	0.9467	222.817	213.505	207.23	20.5587	21.9738	19.4854	-0.9738	-0.8289	-0.3831	3.5284	3.0154	2.8023	Siirt_Pistachio
96605	1221.4	479.162	257.478	0.8434	350.715	0.9908	97499	0.7722	1.861	0.8137	0.7319	0.005	0.0027	0.5357	0.997	229.418	223.343	212.084	20.9964	23.1005	23.975	-1.1247	-0.9391	-0.6753	3.7125	3.1152	2.4848	Siirt_Pistachio
78795	1124.81	450.025	226.534	0.8641	316.741	0.9713	81125	0.782	1.9866	0.7826	0.7038	0.0057	0.0029	0.4954	0.9841	225.087	216.337	197.251	22.3124	24.6543	21.9539	-0.6633	-0.5323	-0.2744	2.6653	2.4824	2.0667	Siirt_Pistachio
84745	1138.69	449.071	240.737	0.8442	328.482	0.9914	85478	0.6908	1.8654	0.8213	0.7315	0.0053	0.0028	0.5351	0.9981	224.64	218.245	200.002	17.7136	18.1765	15.8789	-1.2061	-1.0014	-0.4221	4.1232	3.4742	2.7979	Siirt_Pistachio
77192	1093.13	422.262	233.077	0.8339	313.503	0.9862	78274	0.7788	1.8117	0.8118	0.7424	0.0055	0.003	0.5512	0.9986	213.917	209.621	197.504	19.3166	19.5316	17.7778	-0.9664	-0.8476	0.0894	3.3904	3.1113	3.8419	Siirt_Pistachio
81702	1133.64	447.438	234.444	0.8517	322.531	0.9903	82499	0.7556	1.9085	0.7989	0.7208	0.0055	0.0029	0.5196	0.9917	222.688	223.921	210.21	20.3089	22.5347	22.0238	-0.7963	-0.5255	-0.0844	3.4926	2.8037	2.1762	Siirt_Pistachio
83490	1161.55	448.323	251.664	0.8276	326.041	0.9437	88472	0.6826	1.7814	0.7776	0.7272	0.0054	0.003	0.5289	0.9422	229.031	227.711	216.799	22.9196	25.2388	23.9105	-1.0424	-0.9343	-0.6585	3.4976	3.1388	2.5835	Siirt_Pistachio
90292	1163.06	451.864	257.332	0.822	339.062	0.9882	91367	0.7616	1.756	0.8388	0.7504	0.005	0.0028	0.563	0.9887	225.557	223.718	220.372	20.0534	20.5365	20.8015	-0.855	-0.7735	-0.7379	3.1933	2.9124	2.4918	Siirt_Pistachio
77847	1121.58	439.262	230.699	0.851	314.83	0.9676	80453	0.7367	1.904	0.7777	0.7167	0.0056	0.003	0.5137	0.9781	220.955	214.155	199.208	19.2635	20.7209	21.2433	-1.2068	-0.8596	-0.4155	3.774	3.0118	2.3153	Siirt_Pistachio
94073	1234.5	468.151	259.226	0.8327	346.089	0.9734	96646	0.69	1.806	0.7757	0.7393	0.005	0.0028	0.5465	0.987	219.837	207.035	189.646	22.4497	22.7439	25.9983	-0.5422	-0.3895	0.4057	2.3759	2.338	3.1051	Siirt_Pistachio
97269	2058.2	473.803	271.535	0.8195	351.919	0.9393	103556	0.7537	1.7449	0.2885	0.7428	0.0049	0.0028	0.5517	0.9626	224.852	215.068	202.947	23.353	23.5605	22.8396	-0.7302	-0.6874	-0.4848	2.5882	2.6033	2.615	Siirt_Pistachio
101982	2237.73	463.627	312.545	0.7386	360.344	0.8769	116293	0.6997	1.4834	0.2559	0.7772	0.0045	0.0031	0.6041	0.8961	213.129	198.465	193.686	18.9352	21.0122	15.2474	-0.6662	-0.6732	-0.4745	2.5906	2.568	3.0885	Siirt_Pistachio
99067	1220.47	465.203	273.126	0.8095	355.156	0.9922	99846	0.7438	1.7033	0.8358	0.7634	0.0047	0.0028	0.5828	0.9927	213.624	208.854	200.104	15.9664	16.7682	15.6861	-0.6229	-0.4417	-0.0645	2.9741	2.7515	2.6668	Siirt_Pistachio
79308	1735.13	425.729	257.907	0.7956	317.771	0.9044	87692	0.6954	1.6507	0.331	0.7464	0.0054	0.0033	0.5571	0.9197	210.945	200.451	188.598	24.0789	28.4552	25.4837	-0.126	-0.1363	-0.1504	1.7846	1.7977	1.9026	Siirt_Pistachio
93644	1543.32	473.17	256.98	0.8397	345.299	0.9665	96894	0.7631	1.8413	0.4941	0.7298	0.0051	0.0027	0.5325	0.9806	222.609	216.106	209.586	22.8672	24.9531	23.0948	-0.947	-0.8641	-0.4998	2.8764	2.7633	2.4628	Siirt_Pistachio
91806	1219.03	459.565	258.657	0.8266	341.893	0.967	94936	0.7745	1.7767	0.7763	0.7439	0.005	0.0028	0.5535	0.9834	224.782	221.967	193.57	24.9447	27.3837	23.4192	-0.6927	-0.5199	-0.2012	2.4106	2.161	2.2662	Siirt_Pistachio
79882	1994.86	464.491	244.005	0.8509	318.918	0.886	90165	0.6998	1.9036	0.2523	0.6866	0.0058	0.0031	0.4714	0.8974	227.353	215.867	198.878	20.5251	23.0318	21.3213	-0.9724	-0.7163	-0.4841	3.4061	2.8829	2.3624	Siirt_Pistachio
92049	1182.96	461.05	256.067	0.8316	342.346	0.9915	92839	0.7581	1.8005	0.8266	0.7425	0.005	0.0028	0.5514	0.9927	227.611	217.003	199.746	20.983	21.1464	21.4383	-0.7767	-0.6688	-0.4546	2.9413	2.6878	2.5773	Siirt_Pistachio
87207	1205.83	461.09	256.776	0.8306	333.22	0.9184	94960	0.7032	1.7957	0.7537	0.7227	0.0053	0.0029	0.5223	0.9378	222.512	213.953	202.04	21.0123	22.5234	22.0322	-0.925	-0.8311	-0.6168	3.4172	3.2611	2.8378	Siirt_Pistachio
91169	1202.6	461.572	252.222	0.8375	340.705	0.9855	92515	0.7823	1.83	0.7922	0.7381	0.0051	0.0028	0.5449	0.9971	228.701	219.662	204.214	24.6698	26.8721	24.9411	-0.9704	-0.7838	-0.5123	2.8963	2.5438	2.2666	Siirt_Pistachio
81103	1560.49	432.717	244.913	0.8244	321.346	0.9538	85030	0.7323	1.7668	0.4185	0.7426	0.0053	0.003	0.5515	0.9744	213.282	203.16	187.452	19.4407	20.1246	16.3276	-0.688	-0.6522	-0.4819	2.6607	2.6214	2.8176	Siirt_Pistachio
86506	1174.41	440.546	256.79	0.8126	331.878	0.9578	90314	0.7293	1.7156	0.7882	0.7533	0.0051	0.003	0.5675	0.9736	234.542	225.549	213.548	23.6525	26.4691	24.516	-1.2233	-1.0143	-0.7547	3.6442	3.1895	2.5771	Siirt_Pistachio
98333	1193.41	426.856	294.958	0.7229	353.838	0.9903	99298	0.7499	1.4472	0.8676	0.8289	0.0043	0.003	0.6871	0.9944	228.833	218.058	195.974	17.257	16.6177	14.1097	-1.1989	-1.1848	-0.9253	5.032	5.0864	3.9475	Siirt_Pistachio
86692	1206.14	465.486	238.645	0.8586	332.234	0.9812	88354	0.7767	1.9505	0.7489	0.7137	0.0054	0.0028	0.5094	0.9936	223.655	221.156	214.143	21.4276	24.5075	29.3554	-1.192	-1.0437	-1.1194	3.4972	3.0664	3.2182	Siirt_Pistachio
85432	1213.4	390.338	281.979	0.6915	329.811	0.9751	87611	0.7719	1.3843	0.7292	0.8449	0.0046	0.0033	0.7139	0.9883	209.702	198.553	188.806	16.2273	16.3795	17.5587	-0.8077	-0.5218	0.5128	3.4404	3.8691	5.9361	Siirt_Pistachio
74964	1164.35	383.582	251.818	0.7543	308.945	0.9658	77616	0.7358	1.5233	0.6949	0.8054	0.0051	0.0034	0.6487	0.9881	220.531	211.037	215.125	20.728	20.5881	22.5172	-1.0483	-1.1309	-0.6853	3.4022	3.4887	3.2113	Siirt_Pistachio
99405	1213.48	464.839	272.965	0.8094	355.762	0.9893	100481	0.7415	1.7029	0.8483	0.7653	0.0047	0.0027	0.5857	0.9975	234.864	230.848	222.378	20.9015	21.8553	17.4662	-1.3269	-1.1707	-0.9615	4.4502	3.8205	3.9496	Siirt_Pistachio
86976	2043.9	460.472	280.782	0.7926	332.778	0.8737	99546	0.6699	1.64	0.2616	0.7227	0.0053	0.0032	0.5223	0.8565	214.269	203.892	196.41	19.5415	20.3949	18.2494	-0.6824	-0.6934	-0.7204	2.9209	3.0447	2.8242	Siirt_Pistachio
97711	1220.36	466.268	267.684	0.8188	352.717	0.9905	98646	0.7555	1.7419	0.8245	0.7565	0.0048	0.0027	0.5722	0.9968	231.284	225.145	204.803	22.2964	23.4791	22.7543	-1.056	-0.8227	-0.4793	3.4685	2.9835	2.2818	Siirt_Pistachio
81211	1112.22	415.041	249.878	0.7985	321.56	0.987	82281	0.7673	1.661	0.825	0.7748	0.0051	0.0031	0.6003	0.997	226.122	212.417	196.237	23.5501	22.2236	20.15	-0.8499	-0.8262	-0.5287	2.9084	2.9004	2.4606	Siirt_Pistachio
102976	1316.21	475.661	277.366	0.8124	362.096	0.9779	105300	0.7715	1.7149	0.747	0.7612	0.0046	0.0027	0.5795	0.9938	231.823	220.573	206.522	23.9656	24.7879	20.5899	-0.9868	-0.903	-1.0719	2.9739	2.8399	3.4999	Siirt_Pistachio
88440	1244.88	470.585	240.192	0.8599	335.567	0.9857	89724	0.6528	1.9592	0.7171	0.7131	0.0053	0.0027	0.5085	0.9962	235.688	230.716	217.631	22.6154	22.7803	23.3622	-1.3981	-1.297	-1.1615	4.3165	3.8649	3.5309	Siirt_Pistachio
109687	1509.65	487.157	290.329	0.803	373.708	0.9694	113148	0.7748	1.6779	0.6048	0.7671	0.0044	0.0026	0.5885	0.9874	225.721	216.375	212.327	21.3456	20.9689	19.2753	-0.9654	-1.0012	-0.2926	3.3107	3.4213	3.1278	Siirt_Pistachio
106692	1291.66	507.044	268.812	0.8479	368.571	0.9878	108012	0.6352	1.8862	0.8036	0.7269	0.0048	0.0025	0.5284	0.9967	230.348	220.972	209.696	17.3521	18.2917	16.4725	-1.4103	-1.2017	-0.9442	5.1533	4.4987	4.0851	Siirt_Pistachio
82173	1149.97	445.645	239.185	0.8438	323.459	0.9712	84610	0.7616	1.8632	0.7808	0.7258	0.0054	0.0029	0.5268	0.9816	230.016	220.665	214.663	21.4052	21.542	20.7148	-1.1802	-1.1603	-0.8358	3.7669	3.613	2.8911	Siirt_Pistachio
89703	1370.74	446.718	259.728	0.8136	337.955	0.9588	93557	0.6966	1.7199	0.5999	0.7565	0.005	0.0029	0.5723	0.9844	223.612	215.596	210.768	21.3567	23.6923	24.156	-1.1094	-1.0213	-1.0484	3.293	3.0558	3.2945	Siirt_Pistachio
88471	1222.23	428.716	263.432	0.7889	335.626	0.983	90003	0.7664	1.6274	0.7442	0.7829	0.0048	0.003	0.6129	0.9974	211.186	210.084	205.639	17.9324	19.4441	20.5641	-0.6603	-0.6959	-0.4217	3.9686	3.4899	3.1382	Siirt_Pistachio
84269	1117.51	444.87	242.173	0.8388	327.559	0.9939	84787	0.7093	1.837	0.848	0.7363	0.0053	0.0029	0.5421	0.9959	223.899	218.96	218.959	16.792	16.5342	15.1813	-1.1287	-1.0652	-0.8587	4.1175	3.7834	3.0024	Siirt_Pistachio
109054	2177.39	452.42	330.439	0.683	372.628	0.9268	117667	0.7348	1.3691	0.2891	0.8236	0.0041	0.003	0.6784	0.9288	216.707	207.642	199.758	22.4869	22.4959	20.2232	-0.6405	-0.5999	-0.3572	2.3199	2.3241	2.5228	Siirt_Pistachio
87128	1150.7	445.192	252.378	0.8238	333.069	0.9912	87901	0.6852	1.764	0.8269	0.7481	0.0051	0.0029	0.5597	0.9873	224.464	217.461	209.578	20.9039	20.7515	19.6234	-0.8033	-0.6861	-0.3285	2.7617	2.5231	2.3548	Siirt_Pistachio
76536	2473.86	429.821	268.286	0.7813	312.168	0.8191	93443	0.5999	1.6021	0.1572	0.7263	0.0056	0.0035	0.5275	0.8451	215.041	202.588	191.242	20.0889	22.5452	21.5242	-0.3508	-0.2385	-0.5302	2.4843	2.3888	3.5714	Siirt_Pistachio
75528	1148.73	430.568	224.507	0.8533	310.105	0.9806	77025	0.7591	1.9178	0.7192	0.7202	0.0057	0.003	0.5187	0.9948	219.071	208.018	192.681	17.6481	17.3495	14.2108	-1.0673	-0.7914	-0.2095	3.8064	3.2231	3.114	Siirt_Pistachio
95280	1284.78	478.738	263.87	0.8344	348.302	0.9352	101887	0.749	1.8143	0.7254	0.7275	0.005	0.0028	0.5293	0.9603	229.992	222.425	211.647	21.7	21.9038	19.0963	-1.1466	-0.8828	-0.6211	3.8495	3.3305	3.4138	Siirt_Pistachio
99049	1322.4	482.253	269.639	0.8291	355.124	0.9489	104384	0.7403	1.7885	0.7118	0.7364	0.0049	0.0027	0.5423	0.9698	225.034	223.482	217.148	24.5815	28.0765	25.2605	-0.6857	-0.6926	-0.4809	2.5017	2.4057	2.3298	Siirt_Pistachio
103691	1529.96	426.906	314.168	0.6771	363.35	0.9543	108660	0.775	1.3588	0.5567	0.8511	0.0041	0.003	0.7244	0.9844	221.553	214.984	204.21	20.7705	22.2239	20.3354	-1.1857	-1.1434	-0.6125	3.6071	3.4495	3.3693	Siirt_Pistachio
76794	1286.19	440.926	223.055	0.8626	312.693	0.9691	79243	0.7372	1.9768	0.5833	0.7092	0.0057	0.0029	0.5029	0.9942	215.497	205.088	188.683	18.9421	19.2257	17.0122	-0.802	-0.6532	0.2301	2.975	2.7689	2.7574	Siirt_Pistachio
104832	1281.68	491.952	272.165	0.833	365.344	0.9907	105815	0.7499	1.8075	0.8019	0.7426	0.0047	0.0026	0.5515	0.9969	226.981	218.114	201.297	17.7091	17.6898	17.3225	-1.0206	-1.0011	-0.3743	3.8971	3.7011	3.8461	Siirt_Pistachio
83963	1607.89	440.477	245.97	0.8296	326.963	0.9694	86617	0.7775	1.7908	0.4081	0.7423	0.0052	0.0029	0.551	0.9867	219.176	217.437	208.267	17.7175	19.735	23.4854	-0.891	-0.7365	-0.5664	3.7463	3.2858	3.0178	Siirt_Pistachio
92486	1317.79	486.445	245.798	0.8629	343.157	0.9556	96781	0.7113	1.979	0.6693	0.7054	0.0053	0.0027	0.4976	0.9849	215.557	205.903	186.569	16.4539	16.2881	15.5667	-0.9696	-0.7462	0.1538	3.4842	3.1859	3.3014	Siirt_Pistachio
91604	1315.08	459.285	255.749	0.8306	341.517	0.9893	92593	0.7864	1.7958	0.6656	0.7436	0.005	0.0028	0.5529	0.993	216.255	215.029	206.745	20.3649	20.6497	18.7251	-0.7293	-0.5168	-0.1588	3.1501	2.8309	2.5993	Siirt_Pistachio
85903	1193.19	453.772	241.926	0.846	330.719	0.9855	87165	0.7995	1.8757	0.7582	0.7288	0.0053	0.0028	0.5312	0.9963	218.466	212.729	196.608	18.3117	18.5847	16.8431	-1.2054	-1.067	-0.7082	3.8537	3.4832	3.4123	Siirt_Pistachio
87914	1187.51	446.963	252.601	0.825	334.568	0.9894	88854	0.7405	1.7694	0.7834	0.7485	0.0051	0.0029	0.5603	0.9914	209.171	209.528	201.332	15.3907	15.9068	14.9302	-1.2887	-1.177	-0.666	4.3724	4.0098	3.7702	Siirt_Pistachio
89107	1261.3	446.187	261.044	0.811	336.83	0.9498	93819	0.7916	1.7092	0.7039	0.7549	0.005	0.0029	0.5699	0.9741	219.373	211.511	203.598	18.5074	19.5727	19.4038	-0.8706	-0.7596	-0.4399	3.0683	2.9457	3.1201	Siirt_Pistachio
82562	1806.66	433.714	253.638	0.8112	324.224	0.9383	87991	0.6708	1.71	0.3179	0.7476	0.0053	0.0031	0.5588	0.9556	226.056	213.803	205.258	22.6757	24.935	26.0626	-0.5135	-0.3363	-0.1956	2.3592	2.1594	2.2404	Siirt_Pistachio
77331	1112.24	414.89	241.754	0.8127	313.785	0.9749	79319	0.7172	1.7162	0.7855	0.7563	0.0054	0.0031	0.572	0.9816	226.314	222.248	214.341	19.2771	22.1268	19.0624	-0.9427	-0.8672	-0.4842	3.3732	3.2314	3.3577	Siirt_Pistachio
89442	1235.31	433.121	265.873	0.7894	337.463	0.9775	91502	0.7772	1.629	0.7366	0.7791	0.0048	0.003	0.6071	0.9889	216.104	213.313	205.699	17.9115	19.1301	18.6787	-0.6381	-0.4753	0.0721	2.8717	2.6879	2.3732	Siirt_Pistachio
97684	1296.95	497.56	251.213	0.8632	352.669	0.9898	98693	0.7547	1.9806	0.7298	0.7088	0.0051	0.0026	0.5024	0.9951	221.353	218.62	205.643	17.5524	19.6184	20.7276	-0.9493	-0.8073	-0.6205	3.3418	2.9901	2.695	Siirt_Pistachio
70865	1981.44	426.053	244.528	0.8189	300.38	0.8731	81163	0.6588	1.7423	0.2268	0.705	0.006	0.0035	0.4971	0.8661	227.423	217.36	201.155	21.5299	22.2619	19.427	-1.1223	-0.8798	-0.4648	3.4196	3.0499	2.8528	Siirt_Pistachio
78701	1151.73	445.75	233.035	0.8525	316.552	0.9484	82982	0.6884	1.9128	0.7456	0.7102	0.0057	0.003	0.5043	0.9647	220.2	214.417	203.367	20.8801	21.4486	17.8858	-1.0034	-0.8142	-0.7561	3.2212	2.9446	3.145	Siirt_Pistachio
92515	1173.65	425.349	277.542	0.7578	343.211	0.9897	93476	0.7812	1.5326	0.844	0.8069	0.0046	0.003	0.6511	0.9978	225.037	216.487	200.929	20.2824	20.0923	17.2985	-0.7908	-0.6635	-0.3804	3.1084	2.8828	2.9989	Siirt_Pistachio
92544	1169.63	464.475	254.748	0.8362	343.265	0.9921	93282	0.7556	1.8233	0.8501	0.739	0.005	0.0028	0.5462	0.9958	231.06	227.655	218.809	19.4221	21.3741	20.1947	-1.0388	-0.9703	-0.9061	3.4988	3.5113	3.7602	Siirt_Pistachio
90435	1802.6	448.35	268.359	0.8011	339.331	0.9309	97148	0.7157	1.6707	0.3497	0.7568	0.005	0.003	0.5728	0.957	234.127	223.633	209.54	24.5364	25.7431	20.7139	-1.0091	-0.8668	-0.7218	2.8765	2.7667	2.7154	Siirt_Pistachio
78585	1081.76	416.115	241.472	0.8144	316.319	0.9897	79399	0.7692	1.7232	0.8439	0.7602	0.0053	0.0031	0.5779	0.9958	226.582	216.58	209.921	20.6825	21.314	23.1639	-1.0136	-0.9325	-0.7164	3.211	3.1591	3.5254	Siirt_Pistachio
87912	1253.6	461.389	243.143	0.8499	334.564	0.9879	88991	0.7591	1.8976	0.703	0.7251	0.0052	0.0028	0.5258	0.9978	228.512	227.644	206.492	21.9163	23.8004	24.0894	-0.8482	-0.6998	-0.3749	2.7388	2.3715	2.0455	Siirt_Pistachio
86089	2434.19	479.904	252.798	0.85	331.077	0.9161	93970	0.6944	1.8984	0.1826	0.6899	0.0056	0.0029	0.4759	0.9035	219.053	216.704	199.909	17.931	20.7915	23.6657	-0.8056	-0.6208	-0.4158	3.287	2.8315	3.0517	Siirt_Pistachio
91919	1485.98	501.623	235.871	0.8826	342.104	0.962	95553	0.7368	2.1267	0.5231	0.682	0.0055	0.0026	0.4651	0.9892	198.057	189.025	179.158	14.9447	15.3184	18.4419	-0.4098	-0.2489	0.5584	2.6631	2.7171	3.8362	Siirt_Pistachio
104185	1255.27	487.238	273.895	0.827	364.215	0.9925	104976	0.7472	1.7789	0.8309	0.7475	0.0047	0.0026	0.5588	0.994	230.801	227.588	215.621	17.7807	20.0554	20.5688	-0.9236	-0.7136	-0.4156	3.943	3.2084	2.6894	Siirt_Pistachio
95857	1916.95	419.399	317.57	0.6532	349.355	0.9037	106074	0.6913	1.3206	0.3278	0.833	0.0044	0.0033	0.6939	0.9164	220.445	211.552	201.518	21.3915	22.4571	24.259	-0.6352	-0.6052	0.0657	2.6473	2.6278	2.7172	Siirt_Pistachio
76732	1177.8	409.065	242.69	0.805	312.567	0.9829	78068	0.7215	1.6855	0.6951	0.7641	0.0053	0.0032	0.5839	0.9841	222.113	214.528	207.643	19.2851	19.5498	17.5313	-0.7316	-0.5619	-0.2151	3.1021	2.8665	2.7744	Siirt_Pistachio
95210	1186.61	475.334	255.532	0.8432	348.174	0.9917	96010	0.7961	1.8602	0.8497	0.7325	0.005	0.0027	0.5365	0.998	220.878	212.514	208.126	17.0073	16.6999	18.4992	-0.9486	-0.6356	-0.4242	3.6108	3.2807	2.9661	Siirt_Pistachio
87473	1519.54	414.398	279.91	0.7374	333.728	0.9391	93141	0.7439	1.4805	0.4761	0.8053	0.0047	0.0032	0.6486	0.9602	232.396	225.395	217.707	24.9214	27.4737	25.1692	-0.9515	-0.711	-0.4369	2.8214	2.4008	2.1022	Siirt_Pistachio
68432	1112.88	412.671	224.542	0.839	295.178	0.9334	73313	0.6943	1.8378	0.6943	0.7153	0.006	0.0033	0.5116	0.9403	222.605	214.594	194.27	22.3413	23.7253	21.6294	-0.8408	-0.6975	-0.4901	2.848	2.61	2.3304	Siirt_Pistachio
110047	1694.81	442.1	327.077	0.6728	374.321	0.9459	116346	0.7488	1.3517	0.4814	0.8467	0.004	0.003	0.7169	0.969	215.995	207.448	203.982	19.0119	20.0868	22.7174	-0.4135	-0.4225	0.3602	3.0278	2.9857	3.2888	Siirt_Pistachio
101876	1222.05	457.988	287.414	0.7786	360.156	0.9717	104838	0.7254	1.5935	0.8572	0.7864	0.0045	0.0028	0.6184	0.9854	225.018	220.942	210.505	18.3265	20.1303	19.4736	-0.892	-0.7089	-0.3122	3.8366	3.4193	3.1022	Siirt_Pistachio
84798	1201.79	450.089	242.743	0.8421	328.585	0.9868	85929	0.7263	1.8542	0.7378	0.73	0.0053	0.0029	0.533	0.9882	231.653	224.725	209.558	21.0417	20.9486	18.9805	-1.1678	-1.0431	-1.0221	3.7357	3.4752	3.4435	Siirt_Pistachio
99962	2260.04	470.919	290.149	0.7876	356.757	0.9083	110051	0.6728	1.623	0.2459	0.7576	0.0047	0.0029	0.5739	0.9315	236.15	230.109	217.345	23.95	28.2509	23.07	-1.2826	-1.3237	-1.0166	3.5471	3.7157	3.1582	Siirt_Pistachio
98991	1742.34	479.362	267.746	0.8295	355.02	0.9515	104041	0.7855	1.7904	0.4098	0.7406	0.0048	0.0027	0.5485	0.982	220.285	210.171	193.641	21.1069	21.7428	24.2758	-0.6936	-0.6212	-0.6251	2.8727	2.6682	2.8185	Siirt_Pistachio
75008	2229.25	452.454	287.418	0.7723	309.036	0.7895	95004	0.5952	1.5742	0.1897	0.683	0.006	0.0038	0.4665	0.7344	216.884	210.566	197.632	21.2371	22.0886	19.0731	-0.7285	-0.7887	-0.6108	2.8061	2.8442	2.6161	Siirt_Pistachio
77722	1719.35	412.693	263.94	0.7687	314.577	0.8918	87153	0.6719	1.5636	0.3304	0.7623	0.0053	0.0034	0.581	0.9085	209.234	198.798	182.417	20.62	22.5583	27.292	-0.2867	0.0834	0.1348	2.4265	2.1724	2.0374	Siirt_Pistachio
94501	1323.64	446.7	271.613	0.7939	346.875	0.9743	96998	0.7196	1.6446	0.6778	0.7765	0.0047	0.0029	0.603	0.9917	223.211	213.951	200.335	20.6823	22.4666	24.5438	-0.9629	-0.9042	-0.638	3.105	2.9944	2.9009	Siirt_Pistachio
91050	1140.65	428.199	274.967	0.7666	340.483	0.9664	94218	0.7519	1.5573	0.8794	0.7952	0.0047	0.003	0.6323	0.9846	224.695	216.071	208.493	23.5507	23.5756	19.8828	-1.0292	-0.9291	-0.7479	3.2243	3.0742	2.9891	Siirt_Pistachio
85252	1231.94	422.256	262.674	0.783	329.464	0.9586	88935	0.7595	1.6075	0.7059	0.7802	0.005	0.0031	0.6088	0.9786	211.283	196.871	188.633	16.8996	19.3772	23.8034	-0.5885	-0.3545	0.2098	2.8746	2.6661	3.6392	Siirt_Pistachio
88616	1244.3	440.5	259.972	0.8073	335.901	0.9661	91728	0.7618	1.6944	0.7192	0.7625	0.005	0.0029	0.5815	0.9853	218.265	210.832	203.961	20.7828	22.1591	22.8526	-0.7152	-0.6702	-0.391	2.7049	2.6018	2.6033	Siirt_Pistachio
73212	1276.67	410.638	250.358	0.7926	305.314	0.8961	81705	0.699	1.6402	0.5645	0.7435	0.0056	0.0034	0.5528	0.9067	203.812	197.44	182.027	20.1044	21.2975	18.2197	-0.3731	-0.3995	-0.6032	2.0893	2.1168	2.608	Siirt_Pistachio
106331	1762.91	472.479	302.227	0.7687	367.947	0.928	114584	0.7207	1.5633	0.4299	0.7788	0.0044	0.0028	0.6065	0.9481	217.543	210.976	195.263	24.1547	26.5888	22.9097	-0.4243	-0.3848	-0.4621	2.1939	2.0684	2.7952	Siirt_Pistachio
87321	1156.18	465.045	240.108	0.8564	333.438	0.9932	87920	0.6472	1.9368	0.8209	0.717	0.0053	0.0027	0.5141	0.9957	227.839	219.98	205.161	20.2477	20.648	19.4903	-1.2297	-1.1315	-1.1496	3.7538	3.477	3.9973	Siirt_Pistachio
108140	1401.94	500.828	276.075	0.8343	371.063	0.9871	109555	0.7473	1.8141	0.6914	0.7409	0.0046	0.0026	0.5489	0.9958	219.542	212.717	207.584	17.7217	19.2079	21.7785	-1.0924	-0.9675	-0.2844	4.0503	3.7314	3.2807	Siirt_Pistachio
102609	1202.49	465.488	281.463	0.7965	361.45	0.9948	103149	0.7506	1.6538	0.8917	0.7765	0.0045	0.0027	0.6029	0.9972	228.85	226.036	213.234	14.9922	15.4619	16.1941	-1.2071	-0.9367	-0.4332	5.3374	4.3274	2.8709	Siirt_Pistachio
93587	1311.86	456.447	268.922	0.808	345.194	0.9452	99012	0.7586	1.6973	0.6834	0.7563	0.0049	0.0029	0.5719	0.9708	223.735	209.486	195.617	22.333	22.5288	20.2859	-0.8413	-0.7152	-0.4564	2.8905	2.5809	2.76	Siirt_Pistachio
79462	1841.89	428.784	293.034	0.73	318.079	0.8214	96742	0.6502	1.4633	0.2943	0.7418	0.0054	0.0037	0.5503	0.8052	215.734	212.532	192.289	19.0478	19.9727	18.2705	-0.8409	-0.701	-0.3647	3.2689	3.0231	2.8808	Siirt_Pistachio
88714	1243.56	456.608	248.392	0.8391	336.087	0.9823	90308	0.7341	1.8383	0.7209	0.7361	0.0051	0.0028	0.5418	0.9959	232.749	217.985	196.92	22.6614	26.2218	26.2428	-0.9825	-0.6275	-0.3513	3.1661	2.5381	2.3357	Siirt_Pistachio
80607	1473.35	454.695	252.169	0.8321	320.362	0.8817	91425	0.5546	1.8031	0.4666	0.7046	0.0056	0.0031	0.4964	0.8951	215.683	203.622	193.919	25.418	28.7254	25.0217	-0.2101	-0.0691	-0.1008	2.0354	1.9835	2.1705	Siirt_Pistachio
81601	1112.62	423.913	248.52	0.8101	322.332	0.98	83268	0.6682	1.7058	0.8284	0.7604	0.0052	0.003	0.5782	0.9862	226.346	213.593	201.474	22.2016	20.5795	17.6062	-0.896	-0.9648	-0.8743	2.949	3.0772	3.969	Siirt_Pistachio
85388	1481.99	486.779	232.822	0.8782	329.726	0.9253	92282	0.7101	2.0908	0.4886	0.6774	0.0057	0.0027	0.4588	0.9593	202.719	198.967	195.371	18.6412	19.2049	24.1622	-0.3899	-0.2478	0.2596	2.7506	2.7098	2.6135	Siirt_Pistachio
109286	1422.23	475.828	301.659	0.7734	373.024	0.9547	114467	0.7724	1.5774	0.6789	0.7839	0.0044	0.0028	0.6146	0.9694	232.619	223.194	216.655	23.4042	23.9109	22.2082	-1.1146	-1.0858	-0.7496	3.3358	3.3197	3.2459	Siirt_Pistachio
101809	1196.38	466.096	279.457	0.8003	360.038	0.9951	102315	0.7797	1.6679	0.8938	0.7725	0.0046	0.0027	0.5967	0.9952	231.719	230.292	213.605	18.3083	19.8708	21.6076	-0.883	-0.7434	-0.6049	3.1415	2.7747	2.406	Siirt_Pistachio
82043	1477.53	459.295	230.574	0.8649	323.203	0.9653	84992	0.7758	1.992	0.4723	0.7037	0.0056	0.0028	0.4952	0.9864	212.663	202.438	186.517	14.6425	15.1729	17.2898	-0.952	-0.6427	0.4576	4.2249	4.1252	5.1809	Siirt_Pistachio
88882	1183.24	455.711	249.54	0.8368	336.405	0.9909	89702	0.7574	1.8262	0.7978	0.7382	0.0051	0.0028	0.5449	0.9952	223.556	211.148	193.27	16.5786	15.2368	14.4036	-1.263	-1.0592	-0.3299	4.7689	4.3544	3.9546	Siirt_Pistachio
95449	1275.07	494.959	251.505	0.8613	348.611	0.9523	100228	0.7748	1.968	0.7378	0.7043	0.0052	0.0026	0.4961	0.9763	232.063	218.681	203.06	20.4715	21.0284	19.1137	-1.2658	-1.1221	-0.8256	4.2907	3.963	3.6564	Siirt_Pistachio
103937	1382.43	443.329	313.211	0.7077	363.781	0.9485	109577	0.7631	1.4154	0.6834	0.8206	0.0043	0.003	0.6733	0.9531	229.605	223.127	217.891	25.1767	27.9295	25.7185	-0.85	-0.703	-0.7426	2.8221	2.5314	2.6325	Siirt_Pistachio
103151	2145.13	499.378	280.917	0.8268	362.403	0.9193	112202	0.7205	1.7777	0.2817	0.7257	0.0048	0.0027	0.5267	0.9362	218.463	211.352	203.111	23.7735	28.0656	23.7314	-0.501	-0.3328	-0.0833	2.3377	2.086	2.2025	Siirt_Pistachio
89725	1287.46	479.706	240.043	0.8658	337.996	0.9778	91758	0.7584	1.9984	0.6802	0.7046	0.0053	0.0027	0.4964	0.9921	212.411	204.024	186.258	17.7318	17.7754	19.7083	-0.7112	-0.758	-0.409	2.8879	2.9926	2.7363	Siirt_Pistachio
88017	1192.17	460.069	245.426	0.8458	334.764	0.986	89265	0.7527	1.8746	0.7782	0.7276	0.0052	0.0028	0.5295	0.9925	219.888	217.19	195.82	18.8955	20.1421	19.0902	-0.7314	-0.5901	-0.1763	2.9935	2.7073	3.0162	Siirt_Pistachio
95659	1216.15	460.214	265.924	0.8162	348.994	0.9905	96579	0.6979	1.7306	0.8128	0.7583	0.0048	0.0028	0.5751	0.9952	231.671	230.453	212.435	15.9772	17.2151	16.9144	-0.7632	-0.6849	-0.2521	3.7588	3.441	2.7134	Siirt_Pistachio
85835	1823.28	426.724	283.426	0.7476	330.588	0.8914	96295	0.6515	1.5056	0.3245	0.7747	0.005	0.0033	0.6002	0.9036	228.62	217.587	201.641	20.9286	23.1229	21.216	-0.9114	-0.7585	-0.5274	3.0285	2.6798	2.2275	Siirt_Pistachio
78589	1092.49	416.861	241.892	0.8144	316.327	0.9835	79906	0.7499	1.7233	0.8274	0.7588	0.0053	0.0031	0.5758	0.9923	225.205	218.417	200.016	19.6196	20.8323	20.3299	-0.7722	-0.6243	-0.2438	2.8414	2.6867	2.3686	Siirt_Pistachio
88469	1529.41	427.029	282.889	0.7491	335.622	0.9243	95718	0.7365	1.5095	0.4753	0.7859	0.0048	0.0032	0.6177	0.9325	222.62	210.572	192.97	23.2542	22.7295	19.3629	-0.5965	-0.4824	-0.1994	2.5626	2.5469	2.7871	Siirt_Pistachio
90503	1224.29	456.213	253.448	0.8315	339.458	0.98	92349	0.7596	1.8	0.7588	0.7441	0.005	0.0028	0.5537	0.9966	213.487	201.878	187.397	18.794	18.0627	16.7844	-1.0127	-0.8615	-0.0954	3.3752	3.1461	3.6998	Siirt_Pistachio
89599	1222.9	488.588	235.59	0.8761	337.759	0.9919	90329	0.6652	2.0739	0.7529	0.6913	0.0055	0.0026	0.4779	0.9911	230.563	222.508	205.114	18.9445	19.9413	21.6879	-1.4702	-1.2808	-0.9437	4.5565	4.0812	4.3488	Siirt_Pistachio
112216	1325.07	481.811	297.659	0.7863	377.992	0.9872	113672	0.7722	1.6187	0.8031	0.7845	0.0043	0.0027	0.6155	0.9963	221.982	212.911	187.918	18.1728	19.1897	22.9782	-0.7621	-0.6248	-0.4085	3.1642	2.5694	2.1807	Siirt_Pistachio
76311	2461.94	472.185	268.527	0.8226	311.709	0.7846	97265	0.6352	1.7584	0.1582	0.6601	0.0062	0.0035	0.4358	0.7663	225.188	222.252	213.794	20.9079	24.3545	23.0324	-0.7331	-0.7167	-0.2748	2.701	2.8499	2.2935	Siirt_Pistachio
88747	1964.69	427.278	278.862	0.7577	336.149	0.926	95835	0.7285	1.5322	0.2889	0.7867	0.0048	0.0031	0.6189	0.9483	215.238	201.526	190.456	23.2279	26.2866	21.8909	-0.4168	-0.296	-0.3266	2.1765	1.9123	2.0652	Siirt_Pistachio
79879	1147.99	461.662	246.441	0.8456	318.912	0.9254	86318	0.7071	1.8733	0.7617	0.6908	0.0058	0.0031	0.4772	0.8939	228.217	226.69	211.957	20.5939	23.3955	22.8808	-0.8623	-0.797	-0.6783	3.1987	2.9031	2.5574	Siirt_Pistachio
75735	2683.6	429.387	252.18	0.8094	310.53	0.8676	87293	0.685	1.7027	0.1322	0.7232	0.0057	0.0033	0.523	0.8905	216.846	201.762	194.286	22.7503	25.7316	19.2013	-0.4327	-0.3432	-0.2421	2.1558	1.9879	2.0068	Siirt_Pistachio
100634	1260.08	481.958	266.369	0.8334	357.954	0.9925	101396	0.7059	1.8094	0.7964	0.7427	0.0048	0.0026	0.5516	0.9981	215.581	207.394	193.101	18.0196	17.8784	17.9028	-0.6757	-0.5102	-0.0361	3.4319	3.2116	3.1468	Siirt_Pistachio
104495	2003.6	478.073	301.629	0.7758	364.756	0.9155	114140	0.7523	1.585	0.3271	0.763	0.0046	0.0029	0.5821	0.9227	212.881	209.32	198.138	18.6751	20.3688	16.2206	-0.9902	-0.9763	-0.4849	3.7471	3.6993	3.0162	Siirt_Pistachio
100287	1519.58	445.155	295.435	0.748	357.337	0.9418	106479	0.6967	1.5068	0.5458	0.8027	0.0044	0.0029	0.6444	0.9709	216.114	203.988	200.186	19.1355	22.1207	19.7959	-0.7595	-0.6822	-0.3646	2.9822	2.5984	2.7635	Siirt_Pistachio
101599	1674.67	487.062	271.679	0.83	359.666	0.9576	106092	0.7511	1.7928	0.4552	0.7384	0.0048	0.0027	0.5453	0.9776	223.695	212.545	201.955	19.1656	19.0335	19.1761	-1.102	-1.0089	-0.4396	3.6998	3.4846	3.0974	Siirt_Pistachio
104469	1507.34	509.519	264.543	0.8547	364.711	0.9605	108770	0.613	1.926	0.5778	0.7158	0.0049	0.0025	0.5124	0.9868	218.215	205.884	188.238	19.9176	20.339	20.9059	-1.0459	-0.9084	-0.2749	3.3119	2.9482	3.4567	Siirt_Pistachio
92173	1321.97	457.4	262.559	0.8188	342.576	0.9582	96191	0.7557	1.7421	0.6628	0.749	0.005	0.0028	0.5609	0.9772	213.289	199.538	193.88	20.7816	21.7389	21.5402	-0.6918	-0.6891	-0.8225	2.43	2.3747	3.5927	Siirt_Pistachio
87825	1561.06	424.105	277.305	0.7566	334.398	0.9354	93892	0.7206	1.5294	0.4529	0.7885	0.0048	0.0032	0.6217	0.9508	218.937	214.078	203.527	24.6219	26.624	22.1908	-0.5503	-0.5028	-0.5654	2.1581	2.0291	2.1202	Siirt_Pistachio
93490	1574.96	429.078	287.392	0.7426	345.015	0.9363	99851	0.7616	1.493	0.4736	0.8041	0.0046	0.0031	0.6465	0.9653	213.002	201.217	193.914	22.062	24.5633	19.3953	-0.4294	-0.3784	-0.2675	2.2278	2.0724	2.0396	Siirt_Pistachio
94170	1267.73	440.111	278.416	0.7745	346.267	0.9643	97656	0.6836	1.5808	0.7363	0.7868	0.0047	0.003	0.619	0.9785	217.627	221.979	227.038	20.7092	24.2356	23.7132	-1.2186	-1.0063	-1.045	4.0023	3.2642	3.3184	Siirt_Pistachio
90720	1221.23	455.795	254.81	0.8291	339.865	0.9776	92794	0.7262	1.7888	0.7644	0.7457	0.005	0.0028	0.556	0.9946	215.873	205.988	184.394	18.2989	16.4631	13.362	-0.9503	-0.9024	-0.2465	3.2954	3.4776	3.3281	Siirt_Pistachio
83072	2020.73	448.839	244.471	0.8386	325.224	0.929	89422	0.6941	1.836	0.2557	0.7246	0.0054	0.0029	0.525	0.9639	224.813	212.635	193.69	19.7115	21.1148	17.8099	-1.0991	-1.0542	-1.2789	3.5843	3.5804	4.8592	Siirt_Pistachio
85975	1238.78	430.601	255.172	0.8055	330.858	0.9805	87687	0.7504	1.6875	0.704	0.7684	0.005	0.003	0.5904	0.9963	210.597	202.106	193.701	18.0716	17.5351	18.8617	-0.7552	-0.7359	0.1861	3.5142	3.4667	4.4142	Siirt_Pistachio
88991	2391.59	445.633	279.214	0.7794	336.611	0.8855	100494	0.658	1.596	0.1955	0.7554	0.005	0.0031	0.5706	0.9106	213.099	199.929	184.535	23.4688	25.3667	19.6091	-0.2491	-0.3373	-0.4257	1.8858	1.9554	2.1463	Siirt_Pistachio
83105	1610.72	394.785	277.766	0.7106	325.288	0.9387	88530	0.7145	1.4213	0.4025	0.824	0.0048	0.0033	0.6789	0.9649	205.71	196.164	183.331	18.623	19.0791	19.8342	-0.5238	-0.5085	-0.5741	2.4167	2.413	2.4489	Siirt_Pistachio
81795	1586.3	418.399	258.342	0.7866	322.714	0.9266	88275	0.7157	1.6196	0.4085	0.7713	0.0051	0.0032	0.5949	0.9635	214.261	203.77	197.06	19.7415	20.3448	18.2321	-0.8197	-0.7972	-0.4052	3.1222	3.1248	3.5922	Siirt_Pistachio
86151	1964.14	454.524	271.133	0.8026	331.196	0.841	102434	0.6556	1.6764	0.2806	0.7287	0.0053	0.0031	0.531	0.8901	207.931	196.52	187.19	20.8284	22.9587	17.193	-0.4391	-0.4956	-0.9841	2.0969	2.0661	3.4578	Siirt_Pistachio
96787	2043.44	448.917	285.217	0.7722	351.046	0.9262	104502	0.7	1.5739	0.2913	0.782	0.0046	0.0029	0.6115	0.9625	229.602	215.725	198.271	22.1993	24.0411	23.0915	-0.9136	-0.7777	-0.262	3.1156	2.7319	2.6861	Siirt_Pistachio
106671	2690.43	488.875	300.251	0.7892	368.535	0.918	116199	0.7273	1.6282	0.1852	0.7538	0.0046	0.0028	0.5683	0.9253	222.013	212.825	203.973	22.2348	24.7896	17.5034	-0.5949	-0.5838	-0.4129	2.6207	2.6061	2.9029	Siirt_Pistachio
96659	1243.11	472.224	262.108	0.8318	350.813	0.9825	98379	0.7542	1.8016	0.786	0.7429	0.0049	0.0027	0.5519	0.9943	214.958	208.191	200.336	20.7815	21.857	25.425	-0.8554	-0.8053	-0.7888	2.8464	2.7751	2.7467	Siirt_Pistachio
100988	1275.28	449.854	286.457	0.771	358.583	0.9911	101897	0.7466	1.5704	0.7803	0.7971	0.0045	0.0028	0.6354	0.9978	239.938	230.794	206.436	18.2022	19.6258	20.2302	-1.4542	-1.047	-0.6542	4.7867	4.0129	2.8332	Siirt_Pistachio
79733	1200.71	468.472	240.115	0.8587	318.621	0.8747	91157	0.6722	1.951	0.695	0.6801	0.0059	0.003	0.4626	0.9025	229.726	217.672	199.468	21.8454	23.8477	20.9566	-1.0732	-1.1383	-0.873	3.3536	3.4958	3.0394	Siirt_Pistachio
99362	1201.67	468.142	272.417	0.8133	355.685	0.9932	100043	0.6916	1.7185	0.8647	0.7598	0.0047	0.0027	0.5773	0.992	221.26	216.104	199.882	15.1006	15.5023	16.5631	-1.0339	-0.8482	-0.853	4.711	4.0753	4.1749	Siirt_Pistachio
91176	2058.69	443.768	383.046	0.5049	340.718	0.718	126991	0.594	1.1585	0.2703	0.7678	0.0049	0.0042	0.5895	0.6829	225.936	210.924	195.454	17.129	17.4687	16.4109	-1.1023	-0.7933	-0.1812	4.2928	3.5202	2.7118	Siirt_Pistachio
97139	1206.27	451.166	275.256	0.7923	351.683	0.9911	98014	0.7217	1.6391	0.8389	0.7795	0.0046	0.0028	0.6076	0.9959	227.078	221.19	205.894	22.2319	22.4419	21.8037	-1.0804	-0.9487	-0.6104	3.1766	2.9271	2.5609	Siirt_Pistachio
89562	1241.14	488.774	234.733	0.8771	337.689	0.9901	90459	0.8061	2.0823	0.7306	0.6909	0.0055	0.0026	0.4773	0.9939	218.248	210.334	198.213	18.7468	18.7354	17.7194	-1.0118	-0.7783	0.095	3.58	3.0832	3.2007	Siirt_Pistachio
97523	1212.46	468.618	266.033	0.8232	352.378	0.9903	98477	0.7536	1.7615	0.8336	0.752	0.0048	0.0027	0.5654	0.996	228.744	221.221	200.422	18.9397	21.8019	27.4407	-0.6854	-0.4436	-0.367	3.3441	2.8183	2.6939	Siirt_Pistachio
101104	1889.66	447.708	303.562	0.735	358.789	0.9262	109162	0.7241	1.4749	0.3558	0.8014	0.0044	0.003	0.6422	0.9472	222.771	209.304	188.552	20.7697	24.7944	29.2884	-0.5674	-0.2622	-0.1045	2.7605	2.3475	2.0972	Siirt_Pistachio
102316	1301.27	480.534	277.339	0.8166	360.933	0.9549	107154	0.677	1.7327	0.7593	0.7511	0.0047	0.0027	0.5642	0.9775	216.047	212.56	204.086	22.4496	25.9871	20.1355	-0.8419	-0.7763	-0.6286	2.6611	2.5126	2.6658	Siirt_Pistachio
101260	1264.63	476.253	271.104	0.8222	359.066	0.9872	102571	0.7683	1.7567	0.7956	0.7539	0.0047	0.0027	0.5684	0.9986	223.161	218.643	209.459	17.3321	17.9124	15.6655	-0.9093	-0.8594	-0.4294	3.5599	3.5276	3.1714	Siirt_Pistachio
81288	1107.49	420.827	246.997	0.8096	321.713	0.989	82190	0.7483	1.7038	0.8328	0.7645	0.0052	0.003	0.5844	0.9957	226.49	216.906	205.992	20.1273	19.6883	19.7773	-1.0732	-0.937	-0.5309	3.5339	3.2884	2.8123	Siirt_Pistachio
85885	1813.85	438.959	253.826	0.8159	330.684	0.9619	89283	0.7378	1.7294	0.328	0.7533	0.0051	0.003	0.5675	0.9814	221.726	213.127	197.915	19.8548	21.0455	21.0068	-0.8824	-0.7197	-0.1506	3.07	2.8656	3.033	Siirt_Pistachio
98246	1249.86	495.274	262.649	0.8478	353.682	0.9354	105029	0.6794	1.8857	0.7903	0.7141	0.005	0.0027	0.51	0.9616	228.966	223.365	211.013	21.2968	22.1889	21.2005	-1.0973	-0.9021	-0.2595	3.6261	3.306	2.7431	Siirt_Pistachio
100408	1271.12	482.797	265.63	0.835	357.552	0.9898	101444	0.7655	1.8176	0.7809	0.7406	0.0048	0.0026	0.5485	0.9969	240.867	228.115	209.162	19.8376	22.1569	22.9151	-1.6886	-1.2483	-0.9039	5.4113	3.9943	3.2629	Siirt_Pistachio
87941	1180.72	423.265	269.715	0.7707	334.619	0.9653	91103	0.741	1.5693	0.7927	0.7906	0.0048	0.0031	0.625	0.9808	227.36	217.913	203.204	20.0835	19.9141	18.6097	-1.0559	-1.0274	-1.0241	3.6215	3.4942	3.5476	Siirt_Pistachio
83004	1997.53	463.264	255.474	0.8342	325.091	0.8959	92649	0.6283	1.8134	0.2614	0.7017	0.0056	0.0031	0.4924	0.893	215.035	220.156	210.013	21.2129	23.0244	19.2727	-0.8328	-0.7351	-0.5661	2.6888	2.5161	2.5579	Siirt_Pistachio
104566	1303.79	509.466	262.396	0.8572	364.88	0.9879	105844	0.7596	1.9416	0.773	0.7162	0.0049	0.0025	0.5129	0.9959	229.671	225.15	216.9	18.8728	20.7455	18.849	-1.2495	-0.9872	-0.7636	4.2325	3.4184	3.0925	Siirt_Pistachio
84901	1212.94	462.061	242.886	0.8507	328.785	0.9489	89470	0.7107	1.9024	0.7252	0.7116	0.0054	0.0029	0.5063	0.9632	231.055	223.39	203.455	21.2466	23.8605	25.1938	-1.0535	-0.8974	-0.7907	3.5507	3.167	3.0324	Siirt_Pistachio
116282	1319.36	513.481	289.359	0.8261	384.779	0.9889	117589	0.7592	1.7745	0.8394	0.7494	0.0044	0.0025	0.5615	0.9965	231.748	226.649	210.161	19.1956	20.2274	20.2722	-1.0537	-0.8152	-0.3572	3.7791	3.2555	2.4072	Siirt_Pistachio
105498	1458.7	489.114	277.497	0.8235	366.503	0.9676	109033	0.7251	1.7626	0.623	0.7493	0.0046	0.0026	0.5615	0.9897	230.194	219.532	199.577	21.5252	22.566	25.1462	-1.0188	-0.8044	-0.6229	3.6053	3.1634	2.985	Siirt_Pistachio
84774	1149.2	471.339	229.751	0.8732	328.539	0.9913	85516	0.7527	2.0515	0.8066	0.697	0.0056	0.0027	0.4859	0.9967	230.513	229.071	198.467	20.8654	21.8278	24.6992	-1.1853	-0.9943	-0.1143	3.7007	3.2711	2.3318	Siirt_Pistachio
95181	2403.87	459.569	309.344	0.7395	348.121	0.8476	112300	0.6703	1.4856	0.207	0.7575	0.0048	0.0033	0.5738	0.8524	221.262	203.342	187.099	22.9865	24.3004	19.7309	-0.4786	-0.489	-0.2945	2.4468	2.4559	2.5958	Siirt_Pistachio
83309	1153.14	465.942	228.328	0.8717	325.687	0.9888	84251	0.7979	2.0407	0.7873	0.699	0.0056	0.0027	0.4886	0.997	219.528	211.101	193.349	18.114	18.7884	20.2042	-1.0512	-0.8378	-0.3687	3.3998	2.922	2.2677	Siirt_Pistachio
87946	1372.36	439.006	260.805	0.8044	334.629	0.95	92571	0.7303	1.6833	0.5868	0.7622	0.005	0.003	0.581	0.978	217.729	204.393	196.709	19.0065	19.4251	21.176	-0.8163	-0.6959	0.148	3.1305	3.0154	3.4001	Siirt_Pistachio
90882	1277.04	468.557	249.171	0.8469	340.168	0.9684	93847	0.769	1.8805	0.7003	0.726	0.0052	0.0027	0.5271	0.9911	214.506	202.559	196.341	17.2025	19.3187	18.3585	-0.816	-0.531	-0.4444	3.5906	3.0416	3.106	Siirt_Pistachio
96996	1638.7	453.305	277.16	0.7913	351.424	0.9573	101320	0.6395	1.6355	0.4539	0.7753	0.0047	0.0029	0.601	0.983	222.192	211.852	204.459	22.1498	22.9098	21.4835	-0.8476	-0.6241	-0.3715	2.8249	2.5354	2.6034	Siirt_Pistachio
87431	2142.77	475.55	245.483	0.8565	333.647	0.906	96500	0.7425	1.9372	0.2393	0.7016	0.0054	0.0028	0.4922	0.9536	219.109	211.147	198.661	20.2074	22.2506	18.9394	-0.9486	-0.6952	-0.4683	3.3093	2.9061	2.9489	Siirt_Pistachio
90519	1172.7	444.428	262.243	0.8074	339.488	0.985	91894	0.7794	1.6947	0.8271	0.7639	0.0049	0.0029	0.5835	0.9889	213.213	214.26	214.033	21.7687	22.4386	22.3593	-0.8514	-0.8134	-0.7452	2.7921	2.6807	2.4369	Siirt_Pistachio
91872	1597.36	454.824	264.002	0.8143	342.016	0.9403	97708	0.6575	1.7228	0.4525	0.752	0.005	0.0029	0.5655	0.9742	199.299	196.375	184.23	16.8651	18.1346	18.6998	-0.787	-0.7384	-0.7068	2.5847	2.4274	2.73	Siirt_Pistachio
97495	2725.95	468.515	297.196	0.7731	352.327	0.8712	111913	0.7119	1.5765	0.1649	0.752	0.0048	0.003	0.5655	0.8915	204.351	196.16	162.56	19.3204	20.4475	42.7566	-0.1577	-0.2839	-1.11	2.2486	2.46	3.6554	Siirt_Pistachio
93391	1274.97	470.119	257.82	0.8362	344.832	0.9544	97851	0.7136	1.8234	0.722	0.7335	0.005	0.0028	0.538	0.9811	220.667	208.597	194.865	18.8805	19.7718	19.2222	-1.0053	-0.9213	-1.0154	3.4333	3.4688	4.0154	Siirt_Pistachio
77320	1134.87	440.993	224.038	0.8613	313.762	0.9858	78430	0.7391	1.9684	0.7544	0.7115	0.0057	0.0029	0.5062	0.9964	220.581	218.353	203.882	20.8955	22.6639	22.1433	-0.9486	-0.8678	-0.8635	3.2399	3.0826	3.0796	Siirt_Pistachio
93150	1340.95	489.11	256.452	0.8515	344.387	0.9304	100116	0.7201	1.9072	0.651	0.7041	0.0053	0.0028	0.4958	0.9455	208.987	206.482	190.042	17.9902	19.7582	19.1918	-0.5926	-0.4728	-0.1575	2.8828	2.7348	2.5521	Siirt_Pistachio
81021	1874.47	433.526	247.893	0.8204	321.184	0.9243	87654	0.7083	1.7488	0.2898	0.7409	0.0054	0.0031	0.5489	0.9599	206.084	196.23	188.714	14.9443	15.8951	14.9883	-1.0566	-0.9326	-0.5912	3.8651	3.4425	3.5156	Siirt_Pistachio
88499	1209.72	442.673	257.999	0.8126	335.679	0.9795	90351	0.7419	1.7158	0.7599	0.7583	0.005	0.0029	0.575	0.9866	221.071	211.043	193.59	20.4811	20.6662	19.7161	-0.7901	-0.774	-0.6614	3.0268	3.0159	2.7919	Siirt_Pistachio
86132	1156.82	434.543	255.471	0.8089	331.16	0.978	88066	0.7226	1.701	0.8088	0.7621	0.005	0.003	0.5808	0.9879	228.922	216.225	205.698	21.1033	20.7878	20.839	-0.9678	-0.9539	-0.0794	3.2439	3.1933	3.1966	Siirt_Pistachio
85964	1202.74	409.267	269.569	0.7524	330.837	0.9839	87368	0.7196	1.5182	0.7468	0.8084	0.0048	0.0031	0.6535	0.9921	220.834	207.586	190.134	21.0071	20.7435	18.748	-0.6883	-0.684	-0.4925	2.4352	2.4766	2.941	Siirt_Pistachio
83070	2202.99	462.987	292.88	0.7745	325.22	0.8159	101817	0.623	1.5808	0.2151	0.7024	0.0056	0.0035	0.4934	0.78	219.093	211.474	190.619	17.9616	18.6076	17.9144	-1.0732	-0.9125	-0.799	3.6896	3.3832	2.9093	Siirt_Pistachio
90213	1171.83	441.658	261.985	0.8051	338.914	0.985	91587	0.7541	1.6858	0.8256	0.7674	0.0049	0.0029	0.5889	0.9927	219.02	211.469	200.826	18.652	18.5448	16.6116	-1.2318	-0.9881	-0.1007	4.1964	3.8517	3.948	Siirt_Pistachio
83499	1321.19	440.926	249.585	0.8244	326.059	0.9319	89602	0.7363	1.7666	0.6011	0.7395	0.0053	0.003	0.5468	0.9661	210.755	204.555	181.635	17.4625	20.6596	23.0257	-0.7543	-0.4875	-0.1183	2.9588	2.5406	3.5465	Siirt_Pistachio
78780	1324.88	451.591	239.302	0.8481	316.711	0.9328	84454	0.7021	1.8871	0.564	0.7013	0.0057	0.003	0.4919	0.9282	218.7	210.423	192.38	22.4442	23.3632	21.8965	-0.5637	-0.6142	-0.7228	2.2124	2.425	2.6435	Siirt_Pistachio
85262	2740.54	480.652	278.465	0.8151	329.483	0.826	103219	0.6582	1.7261	0.1427	0.6855	0.0056	0.0033	0.4699	0.8111	207.111	199.555	182.936	22.2398	25.5233	25.149	-0.2798	-0.2402	-0.2899	1.8156	1.7591	1.8152	Siirt_Pistachio
97271	1175.5	448.857	279.628	0.7822	351.922	0.9919	98070	0.743	1.6052	0.8846	0.784	0.0046	0.0029	0.6147	0.9867	235.329	229.545	211.041	16.236	17.9484	16.6766	-1.0797	-0.8678	-0.4395	4.6809	4.0632	3.3758	Siirt_Pistachio
81286	1105.58	423.895	246.33	0.8138	321.709	0.9887	82215	0.7775	1.7208	0.8357	0.7589	0.0052	0.003	0.576	0.9912	228.47	229.52	222.019	22.8337	24.402	27.1826	-0.9227	-0.8376	-0.5459	2.9808	2.653	2.0617	Siirt_Pistachio
87604	2022.63	468.834	257.676	0.8354	333.977	0.908	96480	0.694	1.8195	0.2691	0.7124	0.0054	0.0029	0.5075	0.9233	222.884	206.232	199.211	22.9207	24.3349	21.7417	-0.5403	-0.4681	-0.4924	2.438	2.3968	2.437	Siirt_Pistachio
83595	2267.57	467.628	239.188	0.8593	326.246	0.9202	90849	0.7339	1.9551	0.2043	0.6977	0.0056	0.0029	0.4867	0.9516	233.301	219.503	199.68	22.2377	23.7492	24.5503	-1.1145	-0.9897	-0.6991	3.3851	3.1283	3.2604	Siirt_Pistachio
80192	1939.8	427.733	292.175	0.7303	319.537	0.8303	96587	0.6518	1.464	0.2678	0.747	0.0053	0.0036	0.5581	0.817	223.058	206.939	180.456	20.1732	20.5278	21.4531	-0.7329	-0.5274	-0.3455	2.9316	2.7323	2.6472	Siirt_Pistachio
87016	1761.46	433.329	289.788	0.7435	332.855	0.8608	101085	0.6469	1.4953	0.3524	0.7681	0.005	0.0033	0.59	0.8823	226.883	217.915	203.015	18.1275	20.0396	20.7693	-1.332	-1.1581	-1.0181	4.4865	3.9547	3.6656	Siirt_Pistachio
85127	1149.24	461.857	236.258	0.8593	329.222	0.9928	85743	0.7726	1.9549	0.8099	0.7128	0.0054	0.0028	0.5081	0.9933	235.446	232.46	218.56	20.1196	20.529	18.9063	-1.2722	-1.0446	-0.5198	4.2068	3.6358	2.8499	Siirt_Pistachio
98991	1318.22	489.327	259.369	0.848	355.02	0.9783	101188	0.767	1.8866	0.7159	0.7255	0.0049	0.0026	0.5264	0.9931	228.018	213.852	201.24	20.4556	20.4738	18.5239	-0.9604	-0.7437	-0.131	3.4089	2.9411	2.6859	Siirt_Pistachio
98363	1308.22	499.59	251.237	0.8644	353.892	0.9899	99364	0.7841	1.9885	0.7222	0.7084	0.0051	0.0026	0.5018	0.9978	231.804	224.807	208.44	20.1753	20.9841	19.845	-1.0663	-0.8958	-0.5702	3.2988	2.9528	2.4854	Siirt_Pistachio
96992	1205.26	449.375	275.931	0.7893	351.417	0.9898	97988	0.7732	1.6286	0.839	0.782	0.0046	0.0028	0.6115	0.9959	232.316	225.433	210.844	18.4222	19.6081	18.8222	-1.1266	-0.7986	-0.5568	4.652	3.6688	2.8352	Siirt_Pistachio
98920	1404.62	500.854	252.807	0.8633	354.893	0.9884	100078	0.7728	1.9812	0.6301	0.7086	0.0051	0.0026	0.5021	0.9947	225.452	218.995	200.863	21.4154	22.988	23.513	-0.6477	-0.3964	-0.3811	2.6904	2.3125	2.2767	Siirt_Pistachio
93361	1255.56	499.748	239.852	0.8773	344.777	0.9859	94692	0.7139	2.0836	0.7442	0.6899	0.0054	0.0026	0.476	0.9917	235.384	230.712	213.753	21.24	22.7221	24.636	-1.4186	-1.2625	-1.1502	4.3614	3.8581	3.6391	Siirt_Pistachio
89053	1369.94	452.992	267.731	0.8067	336.728	0.9194	96863	0.7175	1.692	0.5963	0.7433	0.0051	0.003	0.5526	0.9349	213.249	198.685	189.348	17.8676	19.2473	22.3871	-0.769	-0.6365	0.1536	2.8394	2.9047	3.9452	Siirt_Pistachio
92058	1171.62	468.636	250.876	0.8446	342.362	0.9926	92741	0.739	1.868	0.8427	0.7306	0.0051	0.0027	0.5337	0.997	226.671	230.971	226.63	20.7488	21.7703	22.7103	-1.0519	-0.9513	-0.5674	3.6007	3.1891	2.3095	Siirt_Pistachio
98740	1227.06	486.9	259.835	0.8457	354.57	0.9925	99487	0.7484	1.8739	0.8241	0.7282	0.0049	0.0026	0.5303	0.9937	209.355	202.674	188.32	13.4636	14.8342	16.7583	-0.683	-0.469	-0.0129	3.2546	2.7392	2.675	Siirt_Pistachio
96105	1219.9	471.676	260.269	0.834	349.807	0.9896	97116	0.7357	1.8123	0.8115	0.7416	0.0049	0.0027	0.55	0.9968	232.407	221.445	202.388	19.88	20.6401	24.7846	-1.0555	-0.8256	-0.7505	3.6509	3.1146	3.6945	Siirt_Pistachio
98959	1328.33	469.588	287.254	0.7911	354.963	0.9078	109005	0.688	1.6348	0.7048	0.7559	0.0047	0.0029	0.5714	0.9341	234.862	214.365	190.86	22.2314	22.6991	21.4943	-1.0515	-0.9363	-0.8407	3.1589	2.9536	2.9425	Siirt_Pistachio
100078	1239.3	491.665	266.59	0.8402	356.964	0.9584	104419	0.721	1.8443	0.8188	0.726	0.0049	0.0027	0.5271	0.9722	239.78	233.036	218.902	19.541	22.797	24.3844	-1.4485	-1.1663	-0.9413	4.4781	3.6452	3.1072	Siirt_Pistachio
89898	2532.03	471.003	270.694	0.8184	338.322	0.876	102626	0.6604	1.74	0.1762	0.7183	0.0052	0.003	0.516	0.8978	225.006	210.284	184.386	20.3402	22.4681	20.6323	-0.596	-0.6036	-0.4432	2.6307	2.7002	2.7449	Siirt_Pistachio
73036	1550.03	374.445	257.156	0.7269	304.946	0.9381	77859	0.7186	1.4561	0.382	0.8144	0.0051	0.0035	0.6632	0.9657	229.805	222.114	206.391	21.5365	23.4532	23.6004	-1.1621	-1.0926	-1.0129	3.7738	3.4298	3.6659	Siirt_Pistachio
107570	2490.26	476.457	309.441	0.7604	370.084	0.9253	116260	0.752	1.5397	0.218	0.7767	0.0044	0.0029	0.6033	0.929	224.064	208.644	194.272	21.2219	21.6198	20.6445	-0.8269	-0.7206	-0.2628	2.9029	2.7197	3.2579	Siirt_Pistachio
92123	1313.16	454.377	259.589	0.8207	342.483	0.9851	93520	0.7814	1.7504	0.6713	0.7537	0.0049	0.0028	0.5681	0.9944	220.181	213.529	194.139	19.5988	20.7335	20.2895	-1.0535	-0.8966	-0.7142	3.4201	2.9848	2.7434	Siirt_Pistachio
91237	2107.19	447.561	272.956	0.7925	340.832	0.9314	97957	0.7562	1.6397	0.2582	0.7615	0.0049	0.003	0.5799	0.9509	222.079	210.718	202.226	23.5426	26.835	21.5098	-0.5618	-0.5343	-0.3462	2.4359	2.3221	2.3914	Siirt_Pistachio
87112	1203.76	460.106	243.267	0.8488	333.038	0.9742	89421	0.7639	1.8914	0.7555	0.7238	0.0053	0.0028	0.5239	0.9909	224.89	211.59	183.907	19.8567	18.7751	19.5885	-0.7698	-0.6177	-0.5422	2.9621	2.6823	2.6547	Siirt_Pistachio
103290	1367.97	491.533	269.033	0.8369	362.647	0.9854	104823	0.7704	1.827	0.6936	0.7378	0.0048	0.0026	0.5443	0.9945	231.66	219.399	199.117	21.8721	22.4018	20.3236	-0.9971	-0.7188	-0.3049	3.363	3.0064	2.3557	Siirt_Pistachio
103577	1325.34	496.931	266.488	0.844	363.151	0.9874	104898	0.7684	1.8647	0.741	0.7308	0.0048	0.0026	0.534	0.9959	233.53	221	200.937	20.8584	21.8299	19.9604	-1.2607	-1.1057	-0.9391	3.8621	3.3787	3.2427	Siirt_Pistachio
84000	1195.94	442.649	245.305	0.8324	327.035	0.9701	86587	0.7237	1.8045	0.738	0.7388	0.0053	0.0029	0.5458	0.985	217.245	204.653	187.011	17.5064	17.9853	19.9515	-0.7886	-0.4851	0.2832	3.2592	2.9349	3.9336	Siirt_Pistachio
92530	2056.02	427.188	295.052	0.7232	343.239	0.929	99604	0.7498	1.4478	0.2751	0.8035	0.0046	0.0032	0.6456	0.9347	215.803	212.157	200.714	18.0234	20.2945	17.0526	-1.0757	-1.0093	-0.6148	3.7617	3.6505	2.9476	Siirt_Pistachio
90330	1272.63	443.63	271.321	0.7912	339.134	0.9274	97406	0.6852	1.6351	0.7009	0.7645	0.0049	0.003	0.5844	0.9555	220.506	209.915	195.835	18.9624	20.1099	20.4019	-0.8921	-0.7627	-0.5436	3.3341	3.0381	2.7144	Siirt_Pistachio
89959	2383.78	475.053	255.251	0.8434	338.437	0.9179	98002	0.7279	1.8611	0.1989	0.7124	0.0053	0.0028	0.5075	0.9446	218.811	207.883	193.503	21.3333	24.591	18.4764	-0.667	-0.5103	-0.6423	2.4593	2.1448	3.1459	Siirt_Pistachio
58352	1141.79	449.262	171.062	0.9247	272.573	0.9765	59754	0.6487	2.6263	0.5625	0.6067	0.0077	0.0029	0.3681	0.9667	220.243	210.952	186.725	16.0647	16.494	20.7692	-1.3179	-1.3415	-0.9413	4.1471	4.2833	3.5217	Siirt_Pistachio
100235	1370.8	431.267	303.149	0.7113	357.244	0.9604	104372	0.7492	1.4226	0.6703	0.8284	0.0043	0.003	0.6862	0.9762	212.847	201.791	193.048	21.0392	20.5049	17.3565	-0.4399	-0.554	0.0001	2.2041	2.321	3.2631	Siirt_Pistachio
92023	1260.78	502.504	235.123	0.8838	342.297	0.9844	93479	0.7635	2.1372	0.7275	0.6812	0.0055	0.0026	0.464	0.9917	214.968	210.733	193.327	18.562	21.2345	21.8208	-0.7227	-0.5852	-0.4963	2.6219	2.3133	2.369	Siirt_Pistachio
90071	1192.39	476.41	241.288	0.8623	338.647	0.989	91071	0.7384	1.9744	0.7961	0.7108	0.0053	0.0027	0.5053	0.9977	234.015	226.125	212.853	21.0212	21.8079	20.5169	-1.3824	-1.2119	-0.9179	4.1748	3.6916	3.0618	Siirt_Pistachio
75910	1940.19	414.541	268.6	0.7617	310.888	0.8752	86732	0.7025	1.5433	0.2534	0.75	0.0055	0.0035	0.5624	0.868	210.26	204.748	190.917	17.7388	21.0469	19.9124	-0.7636	-0.8947	-0.5677	2.9607	2.9155	2.7445	Siirt_Pistachio
78957	1252.66	414.891	249.563	0.7989	317.067	0.923	85544	0.6646	1.6625	0.6323	0.7642	0.0053	0.0032	0.584	0.9709	210.729	200.067	183.56	21.3117	23.0512	21.6054	-0.3612	-0.221	-0.1293	1.9911	1.9228	2.2829	Siirt_Pistachio
92368	1332.7	455.474	263.137	0.8162	342.938	0.9486	97373	0.7341	1.7309	0.6535	0.7529	0.0049	0.0028	0.5669	0.9813	222.308	212.071	205.594	22.0669	23.6424	22.9824	-0.9271	-0.809	-0.6666	2.9441	2.6753	2.3179	Siirt_Pistachio
97002	1389.7	482.979	258.562	0.8446	351.435	0.966	100419	0.7588	1.8679	0.6312	0.7276	0.005	0.0027	0.5295	0.989	217.163	207.303	200.828	19.9727	21.0407	20.6997	-0.9896	-0.7888	-0.3914	3.229	2.7401	2.6549	Siirt_Pistachio
103770	1294.87	460.492	289.462	0.7777	363.489	0.985	105347	0.7532	1.5909	0.7777	0.7893	0.0044	0.0028	0.6231	0.9912	213.785	204.379	191.241	19.2691	18.6395	17.3302	-0.794	-0.6508	-0.3457	2.9821	2.8636	2.9525	Siirt_Pistachio
87710	2547.3	461.993	259.455	0.8274	334.179	0.9109	96289	0.7221	1.7806	0.1699	0.7233	0.0053	0.003	0.5232	0.9317	226.886	213.963	199.191	25.3852	26.2141	22.9481	-0.7762	-0.6252	-0.5922	2.4638	2.2562	2.4789	Siirt_Pistachio
108710	1365.37	460.527	307.966	0.7435	372.04	0.9512	114282	0.7526	1.4954	0.7328	0.8079	0.0042	0.0028	0.6526	0.9759	221.154	213.453	200.708	18.9261	19.2711	19.6234	-1.0678	-1.0453	-0.5151	3.7044	3.6111	3.4062	Siirt_Pistachio
88835	2115.23	456.292	254.171	0.8305	336.316	0.9458	93926	0.6745	1.7952	0.2495	0.7371	0.0051	0.0029	0.5433	0.9753	210.503	201.715	188.481	16.4267	16.2529	11.1971	-1.225	-1.2235	-0.5414	3.8232	4.0296	4.7	Siirt_Pistachio
98560	2034.28	435.515	315.638	0.689	354.246	0.8665	113742	0.7137	1.3798	0.2993	0.8134	0.0044	0.0032	0.6616	0.9129	219.832	212.741	205.675	21.1468	25.4699	21.0117	-0.7389	-0.6702	-0.2109	3.0339	2.685	2.6786	Siirt_Pistachio
93843	2097.22	452.085	289.626	0.7678	345.666	0.9016	104084	0.6178	1.5609	0.2681	0.7646	0.0048	0.0031	0.5846	0.9125	217.915	205.712	186.169	17.9054	18.7228	17.4077	-1.0455	-0.9909	-0.3498	3.5455	3.3008	2.5193	Siirt_Pistachio
94564	1833.1	430.755	295.737	0.7271	346.991	0.923	102457	0.6634	1.4565	0.3536	0.8055	0.0046	0.0031	0.6489	0.9451	210.998	207.535	195.092	19.0854	24.2777	19.5698	-0.8261	-0.8099	0.0234	2.8028	2.6638	2.3368	Siirt_Pistachio
75288	1545.11	428.863	230.879	0.8427	309.612	0.9377	80294	0.7303	1.8575	0.3963	0.7219	0.0057	0.0031	0.5212	0.9681	224.519	211.993	200.308	23.4795	22.931	23.4744	-0.5786	-0.543	0.0842	2.4261	2.4556	2.9757	Siirt_Pistachio
87332	1940.56	435.628	276.474	0.7728	333.459	0.9016	96868	0.7205	1.5757	0.2914	0.7655	0.005	0.0032	0.5859	0.9232	223.854	217.256	206.841	19.6858	21.5553	19.6063	-1.2879	-1.0362	-0.8441	3.941	3.2481	3.0586	Siirt_Pistachio
80345	1748.54	430.109	264.754	0.7881	319.841	0.9066	88619	0.7165	1.6246	0.3302	0.7436	0.0054	0.0033	0.553	0.8984	216.918	205.299	202.12	23.7974	26.4982	22.9994	-0.2721	-0.2	-0.1261	1.9918	1.9843	1.7876	Siirt_Pistachio
76408	1382.7	414.34	238.614	0.8175	311.906	0.9658	79112	0.7421	1.7364	0.5022	0.7528	0.0054	0.0031	0.5667	0.984	215.816	214.042	204.225	19.6352	20.963	21.1643	-0.9929	-0.9105	-0.6936	3.2118	3.0001	2.7054	Siirt_Pistachio
102230	1340.63	449.747	297.389	0.7502	360.781	0.962	106266	0.7721	1.5123	0.7148	0.8022	0.0044	0.0029	0.6435	0.9732	218.824	213.057	210.852	19.1951	22.6087	23.3236	-0.4589	-0.3285	-0.1295	2.8384	2.4531	2.4346	Siirt_Pistachio
90161	1495.12	474.694	242.882	0.8592	338.816	0.9733	92631	0.7542	1.9544	0.5068	0.7138	0.0053	0.0027	0.5094	0.9957	197.566	199.68	199.251	15.7071	16.1201	16.6929	-0.7512	-0.5734	-0.1964	3.0394	2.767	3.0197	Siirt_Pistachio
80139	1075.23	418.12	244.608	0.811	319.431	0.9928	80719	0.7494	1.7093	0.8711	0.764	0.0052	0.0031	0.5837	0.9977	211.104	210.827	205.123	14.533	15.2768	14.2298	-0.7579	-0.6986	-0.3487	3.4817	3.2926	2.647	Siirt_Pistachio
75567	1397.27	421.094	249.942	0.8048	310.185	0.9075	83271	0.7107	1.6848	0.4864	0.7366	0.0056	0.0033	0.5426	0.9142	212.911	203.127	193.368	20.4204	20.9672	21.4085	-0.6379	-0.5414	-0.0606	2.4679	2.4759	3.2014	Siirt_Pistachio
112235	2312.32	461.667	336.686	0.6842	378.024	0.9057	123924	0.7323	1.3712	0.2638	0.8188	0.0041	0.003	0.6705	0.9194	217.744	219.242	207.095	18.2395	20.4177	17.1714	-1.1843	-1.0911	-0.6153	4.1106	3.9544	3.0352	Siirt_Pistachio
81654	2620.52	424.652	283.201	0.7451	322.436	0.8593	95019	0.6619	1.4995	0.1494	0.7593	0.0052	0.0035	0.5765	0.8645	225.018	225.067	226.482	23.8866	27.1785	25.9503	-0.5493	-0.6458	-0.5074	2.3032	2.4994	2.1582	Siirt_Pistachio
82526	2097.77	449.59	331.653	0.6752	324.153	0.74	111517	0.5987	1.3556	0.2357	0.721	0.0054	0.004	0.5198	0.7047	214.32	213.012	197.901	15.2779	15.6845	12.1641	-1.2807	-1.1646	-0.7261	4.6351	4.3751	3.8449	Siirt_Pistachio
96919	1222.37	491.951	253.883	0.8565	351.285	0.9836	98531	0.7459	1.9377	0.8151	0.7141	0.0051	0.0026	0.5099	0.988	229.683	225.089	210.376	20.4384	20.3342	17.1837	-0.9725	-0.8006	-0.2531	3.5927	3.3002	2.6445	Siirt_Pistachio
91962	1182.86	466.238	253.763	0.8389	342.184	0.9923	92677	0.7643	1.8373	0.826	0.7339	0.0051	0.0028	0.5386	0.9897	237.349	230.552	222.178	21.1635	23.9612	22.785	-1.2189	-1.0353	-0.7806	3.5589	2.9982	2.599	Siirt_Pistachio
95005	1863.43	459.635	274.981	0.8013	347.799	0.9395	101121	0.7287	1.6715	0.3438	0.7567	0.0048	0.0029	0.5726	0.9571	220.294	213.18	199.916	24.0327	25.5358	20.9636	-0.6414	-0.4925	-0.7056	2.5272	2.4123	3.2245	Siirt_Pistachio
80294	1813.29	427.072	255.795	0.8008	319.74	0.9211	87174	0.7062	1.6696	0.3069	0.7487	0.0053	0.0032	0.5605	0.9358	228.248	223.834	218.274	24.3484	28.4411	25.177	-0.6882	-0.7071	-0.3848	2.384	2.4504	2.1103	Siirt_Pistachio
78593	2126.45	455.661	232.118	0.8605	316.335	0.9297	84539	0.5844	1.9631	0.2184	0.6942	0.0058	0.003	0.482	0.9461	224.356	215.283	198.614	21.4895	24.2762	21.1395	-0.6705	-0.5845	-0.2641	2.5008	2.5675	2.5431	Siirt_Pistachio
97567	2048.21	500.577	254.489	0.8611	352.457	0.9529	102390	0.7493	1.967	0.2923	0.7041	0.0051	0.0026	0.4958	0.9752	226.068	224.396	215.596	19.1927	20.8633	19.125	-0.9489	-0.8321	-0.4816	3.3102	3.1145	2.9821	Siirt_Pistachio
102344	1542.08	497.017	266.311	0.8443	360.983	0.9701	105495	0.7686	1.8663	0.5408	0.7263	0.0049	0.0026	0.5275	0.9845	224.733	212.154	200.438	21.3774	21.1735	19.2764	-0.7003	-0.6178	-0.4533	2.6652	2.4585	2.9635	Siirt_Pistachio
98571	2252.96	468.444	287.083	0.7902	354.266	0.91	108320	0.7287	1.6317	0.244	0.7563	0.0048	0.0029	0.5719	0.9332	217.785	215.755	214.56	24.5531	26.8895	26.0807	-0.4523	-0.4134	-0.5178	2.1834	2.0968	2.3057	Siirt_Pistachio
89192	1221.62	470.127	251.265	0.8452	336.991	0.9471	94176	0.6924	1.871	0.751	0.7168	0.0053	0.0028	0.5138	0.9614	236.151	235.414	227.72	21.1806	24.0264	25.5048	-1.3396	-1.2531	-0.9578	4.062	3.6522	3.0226	Siirt_Pistachio
104968	1532.75	493.121	281.987	0.8204	365.581	0.9461	110947	0.7532	1.7487	0.5615	0.7414	0.0047	0.0027	0.5496	0.9611	220.906	217.685	211.389	20.7654	23.1102	21.8112	-0.8151	-0.7116	-0.4304	2.9244	2.7199	2.8409	Siirt_Pistachio
106889	1267.88	506.697	269.941	0.8463	368.911	0.9936	107579	0.7505	1.8771	0.8356	0.7281	0.0047	0.0025	0.5301	0.995	236.482	229.328	208.682	16.1706	16.7028	15.3912	-1.3217	-0.9152	-0.4204	5.8588	4.4269	3.021	Siirt_Pistachio
77000	1945.58	450.762	224.141	0.8676	313.113	0.926	83155	0.7001	2.0111	0.2556	0.6946	0.0059	0.0029	0.4825	0.9704	209.21	206.318	188.829	17.6549	18.9807	18.1277	-0.8666	-0.7296	-0.4503	3.0924	2.7884	2.7088	Siirt_Pistachio
81893	2120.32	427.426	263.358	0.7876	322.908	0.8873	92297	0.6737	1.623	0.2289	0.7555	0.0052	0.0032	0.5707	0.9263	224.432	214.74	207.312	23.9593	25.8845	20.7031	-0.6069	-0.5213	-0.4762	2.3694	2.2393	2.7558	Siirt_Pistachio
85444	1211.75	420.311	262.339	0.7813	329.834	0.9768	87470	0.7839	1.6022	0.7312	0.7847	0.0049	0.0031	0.6158	0.9866	210.964	200.544	199.692	17.9998	19.6828	24.1616	-0.5416	-0.2759	0.4753	2.8304	2.6038	3.0149	Siirt_Pistachio
84191	1876.59	427.076	275.128	0.7648	327.407	0.9004	93509	0.6794	1.5523	0.3004	0.7666	0.0051	0.0033	0.5877	0.9123	213.882	205.484	195.919	20.6905	20.776	19.7239	-0.673	-0.5128	-0.1128	2.6364	2.4061	2.3038	Siirt_Pistachio
97394	1989.66	443.232	292.434	0.7515	352.145	0.9405	103560	0.7592	1.5157	0.3092	0.7945	0.0046	0.003	0.6312	0.9567	225.748	217.735	208.583	21.394	23.9594	22.3099	-0.8494	-0.6748	-0.5333	3.0731	2.7411	2.7981	Siirt_Pistachio
83080	1931.66	408.769	270.337	0.7501	325.24	0.9275	89578	0.7686	1.5121	0.2798	0.7957	0.0049	0.0033	0.6331	0.9572	224.012	211.457	208.227	23.0182	24.1128	19.0951	-0.6049	-0.5254	-0.5731	2.4764	2.3364	2.799	Siirt_Pistachio
107540	1279.28	460.519	299.058	0.7605	370.033	0.9894	108691	0.7519	1.5399	0.8257	0.8035	0.0043	0.0028	0.6456	0.9942	226.47	215.346	199.305	19.9478	19.0001	18.5028	-0.6172	-0.533	-0.151	3.0118	3.0007	2.6322	Siirt_Pistachio
90319	1629.96	461.692	254.202	0.8348	339.113	0.9544	94630	0.7399	1.8162	0.4272	0.7345	0.0051	0.0028	0.5395	0.9798	230.259	220.753	212.367	21.7668	24.1665	24.3732	-0.9953	-0.7569	-0.5639	3.2548	2.8273	2.448	Siirt_Pistachio
85656	1378.43	439.04	250.003	0.822	330.243	0.9681	88477	0.7551	1.7561	0.5665	0.7522	0.0051	0.0029	0.5658	0.9936	210.095	203.256	200.462	18.0735	19.0155	19.0464	-0.8282	-0.7344	-0.6699	2.9422	2.7019	3.3092	Siirt_Pistachio
100306	1273.5	487.229	265.205	0.8389	357.37	0.9747	102914	0.7768	1.8372	0.7772	0.7335	0.0049	0.0026	0.538	0.9884	221.388	213.527	205.055	23.5748	24.7315	21.8356	-0.7849	-0.6348	-0.4168	2.713	2.4225	2.392	Siirt_Pistachio
103099	2306.26	438.854	324.949	0.6721	362.312	0.8909	115719	0.7248	1.3505	0.2436	0.8256	0.0043	0.0032	0.6816	0.9205	225.985	217.643	211.855	24.1694	28.703	20.4922	-0.7538	-0.8408	-0.887	2.7862	2.6275	2.9771	Siirt_Pistachio
91128	1245.07	452.397	258.421	0.8208	340.628	0.9787	93114	0.749	1.7506	0.7387	0.7529	0.005	0.0028	0.5669	0.9925	223.802	218.512	209.565	18.7717	18.2794	14.9269	-1.207	-1.264	-0.5201	5.0816	4.9209	4.2863	Siirt_Pistachio
91907	1149.08	417.488	282.073	0.7372	342.081	0.9906	92780	0.7618	1.4801	0.8747	0.8194	0.0045	0.0031	0.6714	0.9937	219.273	213.904	199.724	18.3206	17.6186	14.455	-0.8593	-0.8331	-0.0003	3.2862	3.1767	3.4189	Siirt_Pistachio
86915	1396.16	402.274	290.544	0.6916	332.661	0.9229	94178	0.7471	1.3846	0.5603	0.827	0.0046	0.0033	0.6838	0.9468	220.43	212.295	211.036	22.0359	25.0407	23.1531	-0.8883	-0.6527	-0.4614	3.1147	2.5764	2.4834	Siirt_Pistachio
99742	1272.32	461.843	279.979	0.7953	356.364	0.968	103037	0.6847	1.6496	0.7743	0.7716	0.0046	0.0028	0.5954	0.9821	229.052	208.143	181.552	23.3576	22.5907	21.752	-0.8068	-0.7878	-0.2088	2.6569	2.7869	3.0963	Siirt_Pistachio
89353	2095.23	455.627	289.623	0.772	337.295	0.882	101302	0.6411	1.5732	0.2558	0.7403	0.0051	0.0032	0.548	0.8621	223.352	204.585	167.284	21.7264	21.5821	22.0134	-0.6443	-0.6231	-0.5949	2.7479	2.6354	2.875	Siirt_Pistachio
95343	1244.39	470.984	260.328	0.8334	348.417	0.9745	97838	0.6285	1.8092	0.7737	0.7398	0.0049	0.0027	0.5473	0.9901	228.417	207.062	172.692	20.291	20.5009	22.6569	-0.916	-0.867	-0.3798	2.9343	2.8711	3.3581	Siirt_Pistachio
98268	1211.7	466.634	269.869	0.8158	353.721	0.9917	99089	0.7342	1.7291	0.8411	0.758	0.0047	0.0027	0.5746	0.9936	232.191	203.847	166.337	18.4859	17.0812	19.5397	-0.7174	-0.6403	-0.303	3.0445	2.8259	2.4819	Siirt_Pistachio
96985	2202.39	472.073	272.979	0.8159	351.404	0.9382	103369	0.6823	1.7293	0.2513	0.7444	0.0049	0.0028	0.5541	0.9582	229.08	211.75	193.617	23.0373	25.0095	25.163	-0.7699	-0.6881	-0.1733	2.5641	2.627	2.5741	Siirt_Pistachio
93375	1211.93	461.971	262.085	0.8235	344.803	0.9678	96480	0.7081	1.7627	0.7989	0.7464	0.0049	0.0028	0.5571	0.9819	238.314	221.546	195.504	22.4488	25.9733	28.4327	-1.4018	-0.92	-0.6477	4.0692	3.0429	2.4639	Siirt_Pistachio
78039	1407.31	467.364	249.839	0.8451	315.218	0.8643	90291	0.6503	1.8707	0.4952	0.6745	0.006	0.0032	0.4549	0.851	228.86	209.077	185.983	22.43	25.1571	26.593	-0.6696	-0.5021	-0.4295	2.4359	2.2737	2.0294	Siirt_Pistachio
86526	1148.39	429.745	260.67	0.795	331.916	0.9611	90032	0.7601	1.6486	0.8245	0.7724	0.005	0.003	0.5965	0.9835	233.788	218.199	186.052	22.4499	23.2152	25.4431	-1.0579	-0.902	-0.6022	3.1922	3.0478	2.8806	Siirt_Pistachio
83653	2057.99	435.336	256.369	0.8082	326.359	0.9235	90584	0.6446	1.6981	0.2482	0.7497	0.0052	0.0031	0.562	0.9543	228.633	209.566	180.731	21.0539	21.173	21.3534	-0.8512	-0.8593	-0.5451	2.9432	2.9878	3.1434	Siirt_Pistachio
66225	1764.96	394.759	271.001	0.7271	290.38	0.8088	81880	0.6561	1.4567	0.2672	0.7356	0.006	0.0041	0.5411	0.7882	225.332	208.214	178.245	20.4118	19.7182	16.4963	-0.6083	-0.5907	-0.2552	2.7274	2.8407	2.4839	Siirt_Pistachio
76115	1104.8	419.103	246.62	0.8085	311.308	0.9333	81552	0.6787	1.6994	0.7836	0.7428	0.0055	0.0032	0.5517	0.9376	236.606	223.771	207.126	21.2435	23.7449	26.5025	-1.0972	-0.8412	-0.5132	3.309	2.9999	2.2522	Siirt_Pistachio
78446	1105.79	418.841	239.287	0.8207	316.039	0.9885	79357	0.6593	1.7504	0.8062	0.7546	0.0053	0.0031	0.5694	0.9966	229.528	212.123	181.738	21.671	22.135	26.7098	-0.9255	-0.6689	-0.0558	2.9798	2.6093	2.1725	Siirt_Pistachio
92956	1275.09	484.929	245.301	0.8626	344.028	0.9878	94101	0.6377	1.9769	0.7185	0.7094	0.0052	0.0026	0.5033	0.995	226.625	206.764	172.517	19.903	19.1923	22.5196	-0.8811	-0.7349	-0.2675	3.1287	2.859	2.3861	Siirt_Pistachio
107779	2136.95	507.497	281.355	0.8323	370.444	0.9394	114733	0.7077	1.8038	0.2966	0.7299	0.0047	0.0026	0.5328	0.9611	231.49	216.126	187.086	21.8255	22.4718	22.6295	-1.0222	-0.9194	-0.6216	3.0575	2.949	2.8686	Siirt_Pistachio
94959	1157.55	448.36	270.961	0.7967	347.715	0.9891	96009	0.7077	1.6547	0.8906	0.7755	0.0047	0.0029	0.6014	0.9952	233.172	218	186.798	17.866	18.8601	18.5278	-0.9257	-0.5929	-0.0885	3.7106	3.1961	2.7631	Siirt_Pistachio
87446	2339.06	471.053	317.617	0.7385	333.676	0.7702	113541	0.6111	1.4831	0.2008	0.7084	0.0054	0.0036	0.5018	0.7442	208.595	192.948	162.909	15.4871	14.6261	13.0916	-0.876	-0.6958	0.0769	3.2616	3.0366	4.7793	Siirt_Pistachio
93975	1313.67	480.27	251.212	0.8523	345.909	0.9787	96016	0.702	1.9118	0.6843	0.7202	0.0051	0.0027	0.5187	0.9917	226.333	216.675	190.587	18.8308	19.5089	20.0266	-1.1684	-1.0173	-0.5444	4.0354	3.6758	3.0649	Siirt_Pistachio
86722	1997.13	478.856	241.397	0.8636	332.292	0.9454	91729	0.7466	1.9837	0.2732	0.6939	0.0055	0.0028	0.4815	0.9552	221.664	209.626	183.414	20.4695	21.9128	21.1698	-0.8363	-0.7003	-0.6157	3.1355	2.9139	2.7047	Siirt_Pistachio
88211	1271.26	443.99	256.729	0.8159	335.132	0.9665	91270	0.7499	1.7294	0.6859	0.7548	0.005	0.0029	0.5698	0.9853	227.446	205.136	167.529	21.9153	21.1809	21.801	-0.6211	-0.5618	-0.5845	2.3149	2.223	2.3494	Siirt_Pistachio
70101	1939.41	361.682	286.698	0.6096	298.756	0.8684	80725	0.6737	1.2615	0.2342	0.826	0.0052	0.0041	0.6823	0.8608	221.406	207.441	185.596	22.5333	26.5518	26.3767	-0.6462	-0.7019	-0.2893	2.4465	2.6127	2.1037	Siirt_Pistachio
86345	1361.91	437.86	255.143	0.8127	331.569	0.9566	90266	0.7705	1.7161	0.585	0.7572	0.0051	0.003	0.5734	0.9841	230.318	208.39	168.27	19.8762	21.6106	26.5618	-0.9644	-0.7688	-0.6992	3.2395	2.7357	3.1016	Siirt_Pistachio
87633	1362.97	443.642	255.5	0.8175	334.033	0.9546	91797	0.7101	1.7364	0.5928	0.7529	0.0051	0.0029	0.5669	0.9844	214.024	196.274	167.577	15.6439	16.031	18.0349	-1.0974	-0.9313	-0.3904	3.6895	3.2807	3.5448	Siirt_Pistachio
84620	1254.24	470.173	234.778	0.8664	328.24	0.9521	88879	0.6564	2.0026	0.676	0.6981	0.0056	0.0028	0.4874	0.976	217.492	199.626	172.735	19.7375	20.0238	20.4339	-0.7688	-0.7087	-0.5422	2.9295	2.8068	3.2052	Siirt_Pistachio
87193	1154.17	432.781	257.999	0.8029	333.193	0.9842	88592	0.7609	1.6775	0.8225	0.7699	0.005	0.003	0.5927	0.9943	229.143	213.473	182.332	23.7915	23.8746	24.5629	-0.9314	-0.9279	-0.9331	2.9526	2.8493	2.9729	Siirt_Pistachio
73158	1987.9	474.997	274.992	0.8154	305.201	0.7669	95394	0.5925	1.7273	0.2326	0.6425	0.0065	0.0038	0.4128	0.7131	206.199	186.127	147.368	19.2157	19.1146	14.9112	-0.3612	-0.2628	-0.1221	2.0528	1.9674	2.0262	Siirt_Pistachio
85831	1185.49	448.878	244.347	0.8389	330.58	0.9823	87377	0.7485	1.8371	0.7675	0.7365	0.0052	0.0028	0.5424	0.9964	221.48	206.955	178.456	21.5592	21.7645	20.8106	-1.0736	-0.8903	-0.5135	3.2827	2.8844	2.6546	Siirt_Pistachio
90762	1142.96	387.243	301.202	0.6285	339.944	0.9838	92260	0.7847	1.2857	0.8731	0.8779	0.0043	0.0033	0.7706	0.9908	205.88	198.188	188.435	18.2384	18.3989	18.1518	-0.5993	-0.3891	-0.2488	2.2818	2.0192	2.2753	Siirt_Pistachio
96405	1220.41	477.72	257.372	0.8425	350.352	0.9898	97394	0.7529	1.8561	0.8134	0.7334	0.005	0.0027	0.5379	0.9983	234.564	230	213.47	21.543	22.6094	19.7559	-1.5064	-1.398	-1.3221	4.7712	4.3773	4.1783	Siirt_Pistachio
89507	1203.98	469.033	244.465	0.8534	337.585	0.9787	91454	0.7582	1.9186	0.7759	0.7197	0.0052	0.0027	0.518	0.9939	219.579	213.807	205.122	20.6856	21.3767	19.378	-0.8615	-0.7253	-0.5343	3.1686	2.7951	2.3589	Siirt_Pistachio
84358	1448.79	437.268	251.794	0.8176	327.731	0.9636	87549	0.7274	1.7366	0.505	0.7495	0.0052	0.003	0.5617	0.9755	212.707	202.584	195.862	24.6342	28.801	19.7838	-0.1631	-0.1963	-0.0388	1.7152	1.6655	1.9079	Siirt_Pistachio
87705	1125.98	402.505	280.547	0.7171	334.17	0.9825	89269	0.765	1.4347	0.8693	0.8302	0.0046	0.0032	0.6893	0.9889	216.006	212.762	194.263	21.4265	22.0577	19.9314	-0.5311	-0.4059	-0.1645	2.5339	2.5299	2.3985	Siirt_Pistachio
103939	1661.27	494.777	273.179	0.8338	363.785	0.9538	108978	0.7417	1.8112	0.4733	0.7353	0.0048	0.0026	0.5406	0.9791	211.494	206.355	202.297	20.1043	21.2252	18.668	-0.5155	-0.411	-0.5242	2.6519	2.4473	2.9085	Siirt_Pistachio
94993	1188.8	453.773	268.453	0.8062	347.777	0.9916	95799	0.7428	1.6903	0.8447	0.7664	0.0048	0.0028	0.5874	0.9929	218.863	212.979	201.049	17.9166	17.8644	17.1576	-0.6047	-0.5047	0.0541	3.4889	3.3145	2.5196	Siirt_Pistachio
93797	1208.5	464.456	258.349	0.831	345.581	0.988	94935	0.7703	1.7978	0.8071	0.7441	0.005	0.0028	0.5536	0.9953	222.825	214.998	202.758	19.4815	19.6145	19.0285	-1.0574	-0.846	-0.2431	3.442	2.9601	2.5405	Siirt_Pistachio
78462	1104.46	421.974	239.858	0.8227	316.071	0.9828	79833	0.7599	1.7593	0.8083	0.749	0.0054	0.0031	0.561	0.987	230.18	223.904	205.166	19.5521	20.2448	17.0558	-1.4281	-1.2287	-1.0513	4.6673	3.9238	3.7448	Siirt_Pistachio
93512	1192.15	456.824	261.97	0.8192	345.055	0.9871	94738	0.7622	1.7438	0.8268	0.7553	0.0049	0.0028	0.5705	0.9949	222.334	212.355	195.944	20.4119	19.4624	18.3163	-0.5529	-0.4775	-0.3568	2.7589	2.6228	2.3756	Siirt_Pistachio
84675	1475.32	398.75	275.507	0.7229	328.347	0.9486	89265	0.7252	1.4473	0.4889	0.8234	0.0047	0.0033	0.6781	0.9814	221.676	211	208.899	24.7929	25.904	20.9817	-0.4026	-0.3988	-0.4479	2.1416	2.0361	2.3729	Siirt_Pistachio
88942	1145.69	429.783	265.832	0.7858	336.518	0.9803	90725	0.7449	1.6167	0.8515	0.783	0.0048	0.003	0.6131	0.9912	233.445	234.726	235.001	24.7013	26.5968	25.754	-1.2752	-1.1802	-0.9691	3.7654	3.3548	2.602	Siirt_Pistachio
104873	1365.25	457.043	297.893	0.7584	365.415	0.9683	108311	0.7791	1.5343	0.707	0.7995	0.0044	0.0028	0.6392	0.9807	222.252	210.974	204.676	21.76	22.8751	23.8561	-0.6545	-0.6296	-0.3344	2.5428	2.3874	2.7416	Siirt_Pistachio
97758	1320.06	473.643	269.811	0.8219	352.802	0.9513	102764	0.77	1.7555	0.705	0.7449	0.0048	0.0028	0.5548	0.974	231.039	226.337	224.404	24.8473	26.4177	23.6857	-1.2336	-1.0371	-0.843	3.5226	3.0289	2.8696	Siirt_Pistachio
83813	1173.49	462.543	232.048	0.8651	326.671	0.9834	85232	0.794	1.9933	0.7648	0.7063	0.0055	0.0028	0.4988	0.9942	227.587	221.956	210.062	23.308	24.5763	21.9254	-0.7867	-0.5059	-0.3175	2.9514	2.4419	2.1448	Siirt_Pistachio
91072	1199.78	472.502	246.797	0.8528	340.524	0.9902	91975	0.7607	1.9145	0.795	0.7207	0.0052	0.0027	0.5194	0.9944	230.171	228.037	211.353	20.6476	21.2893	19.3048	-1.4056	-1.2093	-0.6975	4.4566	3.8319	2.9175	Siirt_Pistachio
70860	1053.1	394.838	236.299	0.8011	300.369	0.9636	73537	0.6961	1.6709	0.8029	0.7607	0.0056	0.0033	0.5787	0.967	226.66	222.981	208.865	22.991	25.2157	21.1493	-0.8758	-0.8124	-0.4998	3.0844	2.9362	2.5867	Siirt_Pistachio
90443	1163.65	436.221	266.728	0.7913	339.346	0.987	91632	0.7188	1.6355	0.8393	0.7779	0.0048	0.0029	0.6052	0.9897	226.156	219.725	197.903	21.6821	19.8307	17.3779	-0.8834	-0.6942	0.1817	3.0889	3.0832	2.9024	Siirt_Pistachio
97000	1892.37	448.493	283.85	0.7742	351.432	0.9532	101765	0.7507	1.58	0.3404	0.7836	0.0046	0.0029	0.614	0.9701	219.954	219.121	204.889	19.7749	22.2175	19.0364	-0.9556	-0.9637	-0.951	3.7013	3.3928	3.4907	Siirt_Pistachio
81381	1124.19	437.566	242.544	0.8323	321.897	0.9686	84018	0.7676	1.8041	0.8092	0.7357	0.0054	0.003	0.5412	0.9763	235.05	228.158	215.57	23.0801	26.0197	22.245	-1.2288	-0.963	-0.8036	3.7654	3.0482	2.6402	Siirt_Pistachio
100292	1265.08	457.154	285.571	0.7809	357.345	0.9634	104098	0.7505	1.6008	0.7875	0.7817	0.0046	0.0028	0.611	0.9781	215.797	202.228	195.334	19.3643	20.9215	21.4989	-0.5699	-0.5535	0.6233	2.6524	2.5544	4.0788	Siirt_Pistachio
96762	1235.44	450.257	280.77	0.7818	351	0.9636	100422	0.7538	1.6036	0.7967	0.7796	0.0047	0.0029	0.6077	0.9745	234.832	229.508	225.263	24.3314	27.2319	27.5078	-1.1364	-0.9114	-0.6014	3.3699	2.8555	2.2042	Siirt_Pistachio
84108	1157.05	444.912	246.66	0.8322	327.245	0.9624	87396	0.7169	1.8037	0.7895	0.7355	0.0053	0.0029	0.541	0.9758	226.045	220.442	206.296	23.1388	23.5872	21.2353	-0.9597	-0.8653	-0.5845	3.074	2.8381	2.4782	Siirt_Pistachio
93313	1862.73	447.167	278.489	0.7824	344.688	0.9361	99678	0.7607	1.6057	0.338	0.7708	0.0048	0.003	0.5942	0.9541	225.624	211.857	197.378	24.2406	25.3167	20.3244	-0.7024	-0.6749	-0.3293	2.4235	2.399	1.9412	Siirt_Pistachio
84557	1138.9	416.459	261.965	0.7774	328.118	0.9773	86517	0.6752	1.5898	0.8192	0.7879	0.0049	0.0031	0.6207	0.9868	218.241	220.024	207.943	20.0779	22.5171	20.4632	-1.1024	-0.9748	-0.2712	3.5983	3.2903	2.9658	Siirt_Pistachio
85183	1158.35	448.84	242.469	0.8415	329.33	0.9884	86181	0.6929	1.8511	0.7978	0.7337	0.0053	0.0028	0.5384	0.9966	221.142	212.554	198.254	21.2239	21.6971	20.086	-0.8754	-0.9009	-0.64	3.0296	2.8424	2.4702	Siirt_Pistachio
104539	1214.1	450.337	297.327	0.7511	364.833	0.9932	105254	0.7563	1.5146	0.8912	0.8101	0.0043	0.0028	0.6563	0.9941	234.273	228.176	223.005	21.1958	22.5167	21.4745	-1.0718	-0.7479	-0.4145	3.6602	2.968	2.3745	Siirt_Pistachio
80593	1179.55	427.622	241.073	0.8259	320.334	0.9814	82118	0.7448	1.7738	0.7279	0.7491	0.0053	0.003	0.5612	0.9954	221.672	212.542	203.053	18.8902	19.8618	20.7082	-1.3529	-1.2206	-0.8399	4.2014	3.9608	4.1346	Siirt_Pistachio
79334	1913.14	439.561	267.361	0.7937	317.823	0.8656	91655	0.6803	1.6441	0.2724	0.723	0.0055	0.0034	0.5228	0.8595	213.201	199.336	191.258	21.7751	28.6665	20.9485	-0.206	-0.2129	-0.1346	2.0238	1.9314	2.2193	Siirt_Pistachio
85437	1160.38	459.096	237.646	0.8556	329.821	0.9915	86172	0.7449	1.9318	0.7974	0.7184	0.0054	0.0028	0.5161	0.9971	217.936	210.34	194.316	16.7105	15.4937	14.1683	-1.0083	-0.7823	-0.0973	4.0658	3.6514	3.4383	Siirt_Pistachio
79694	1112.74	428.486	238.099	0.8314	318.543	0.9841	80978	0.687	1.7996	0.8088	0.7434	0.0054	0.003	0.5527	0.9946	226.013	213.025	194.778	20.6626	20.9628	19.3385	-0.968	-0.8847	-0.6038	3.2006	2.9577	3.01	Siirt_Pistachio
99458	1251.76	496.096	255.824	0.8568	355.856	0.9881	100655	0.7871	1.9392	0.7976	0.7173	0.005	0.0026	0.5145	0.9978	230.353	220.65	199.481	20.9418	20.3412	16.0589	-1.0982	-0.9818	-0.5979	3.5339	3.1814	3.5887	Siirt_Pistachio
72760	1370.89	426.019	226.545	0.8469	304.37	0.9331	77973	0.7284	1.8805	0.4865	0.7145	0.0059	0.0031	0.5104	0.9599	220.239	207.108	199.664	25.4243	29.2032	22.9959	-0.4065	-0.3727	-0.2575	2.0074	1.913	2.0717	Siirt_Pistachio
78545	1126.5	434.018	232.099	0.845	316.238	0.9841	79817	0.7558	1.87	0.7778	0.7286	0.0055	0.003	0.5309	0.9928	216.254	202.231	178.428	16.3387	15.8403	16.4078	-1.1936	-0.9221	0.4334	4.0147	3.7092	5.0925	Siirt_Pistachio
78909	1221.28	411	245.849	0.8014	316.97	0.9758	80865	0.7584	1.6718	0.6648	0.7712	0.0052	0.0031	0.5948	0.9943	213.167	204.61	192.105	18.1071	18.8688	20.1391	-1.0051	-0.8482	-0.3982	3.3612	2.9957	2.8018	Siirt_Pistachio
85339	1171.86	464.479	238.47	0.8581	329.632	0.9626	88654	0.7632	1.9477	0.7809	0.7097	0.0054	0.0028	0.5036	0.981	228.292	221.311	210.493	20.9772	22.7332	22.2422	-1.1443	-1.0778	-0.7965	3.5314	3.247	2.7827	Siirt_Pistachio
93649	1274.82	461.161	260.893	0.8246	345.308	0.9849	95085	0.7754	1.7676	0.7241	0.7488	0.0049	0.0028	0.5607	0.9911	206.344	196.362	178.935	15.5272	16.431	18.1011	-0.6144	-0.5098	-0.29	2.7279	2.6507	2.6358	Siirt_Pistachio
92352	1214.38	460.528	263.27	0.8205	342.909	0.9709	95122	0.7441	1.7493	0.787	0.7446	0.005	0.0029	0.5544	0.9698	217.619	210.619	196.134	19.3399	20.5344	17.0016	-0.951	-0.8497	-0.2634	3.1918	3.1399	2.7183	Siirt_Pistachio
90243	1177.62	463.154	248.842	0.8434	338.97	0.9911	91050	0.7525	1.8612	0.8177	0.7319	0.0051	0.0028	0.5356	0.997	221.156	210.648	192.57	15.5924	15.3894	13.5243	-1.0916	-1.0294	-0.543	4.3225	4.071	3.1269	Siirt_Pistachio
77867	1164.86	440.255	227.331	0.8564	314.87	0.9729	80038	0.7548	1.9366	0.7211	0.7152	0.0057	0.0029	0.5115	0.9906	221.586	209.712	187.352	20.0593	19.7516	16.8631	-1.0651	-1.017	-0.284	3.2041	3.1401	2.9167	Siirt_Pistachio
82986	1621.6	427.656	252.697	0.8068	325.055	0.9649	86005	0.7828	1.6924	0.3966	0.7601	0.0052	0.003	0.5777	0.9777	223.33	216.711	206.252	21.093	24.1724	19.4883	-1.0476	-0.8915	-0.7131	3.1485	2.6994	2.4496	Siirt_Pistachio
91355	1671.03	445.817	272.996	0.7906	341.053	0.9265	98606	0.6968	1.6331	0.4111	0.765	0.0049	0.003	0.5852	0.9557	207.078	195.982	182.969	19.2083	19.8465	15.8202	-0.4165	-0.2911	-0.5092	2.3373	2.3104	2.8826	Siirt_Pistachio
82032	1905.99	433.902	267.139	0.788	323.182	0.8903	92136	0.6984	1.6243	0.2838	0.7448	0.0053	0.0033	0.5548	0.9011	208.546	193.478	181.735	19.9998	22.6635	16.715	-0.1997	-0.3032	-0.3355	1.9898	2.0682	2.2518	Siirt_Pistachio
91634	1201.67	450.235	262.762	0.812	341.573	0.9663	94825	0.7701	1.7135	0.7974	0.7587	0.0049	0.0029	0.5756	0.9862	220.467	212.369	202.164	22.1945	23.2004	20.927	-0.665	-0.5733	-0.6469	2.4047	2.1435	2.0421	Siirt_Pistachio
75086	1279.36	390.016	248.596	0.7705	309.197	0.958	78380	0.749	1.5689	0.5765	0.7928	0.0052	0.0033	0.6285	0.986	200.443	189.268	181.909	14.5257	15.1063	15.1717	-0.4581	-0.4474	0.4123	3.056	3.0114	4.2611	Siirt_Pistachio
69286	1065.28	388.959	228.66	0.8089	297.015	0.9773	70896	0.752	1.701	0.7672	0.7636	0.0056	0.0033	0.5831	0.9919	206.533	196.901	190.176	14.8605	15.924	17.9745	-0.9451	-0.8248	-0.2246	3.5924	3.0343	3.3472	Siirt_Pistachio
89813	1238.3	487.396	242.091	0.8679	338.162	0.9508	94463	0.6079	2.0133	0.736	0.6938	0.0054	0.0027	0.4814	0.9691	219.582	209.924	196.577	19.6753	20.0133	16.4729	-1.0879	-1.0632	-0.8315	3.2491	3.1589	3.4129	Siirt_Pistachio
98034	1232.98	468.206	270.436	0.8163	353.3	0.9872	99310	0.6703	1.7313	0.8104	0.7546	0.0048	0.0028	0.5694	0.9858	225.657	216.438	196.439	16.8249	17.3476	13.0218	-1.1686	-0.9722	-0.394	4.733	4.0704	3.6213	Siirt_Pistachio
73273	1126.72	418.944	229.567	0.8365	305.441	0.9474	77341	0.6093	1.8249	0.7253	0.7291	0.0057	0.0031	0.5315	0.97	213.059	209.043	198.366	22.0267	27.0619	23.1574	-0.2889	-0.172	-0.2557	2.1369	1.8548	1.8382	Siirt_Pistachio
[truncated: 361 more rows]

## Sheet: Citation Request
Citation Request : OZKAN I.A., KOKLU M. and SARACOGLU R. (2021). "Classification of Pistachio Species Using Improved K-NN Classifier" Progress in Nutrition, Vol. 23, N. 2, pp. DOI:10.23751/pn.v23i2.9686 DATASET: https://www.muratkoklu.com/datasets/ Article Download (PDF): https://www.mattioli1885journals.com/index.php/progressinnutrition/article/view/9686/9178
