# Supplementary material
Source: ML conference proceedings conference paper supplement (https://openreview.net/forum?id=d6kqUKzG3V)
Supplement: supplementary_material [file Raisin_Dataset.xlsx]

## Sheet: Raisin_Grains_Dataset
Area	MajorAxisLength	MinorAxisLength	Eccentricity	ConvexArea	Extent	Perimeter	Class
87524	442.246	253.291	0.819738	90546	0.758651	1184.04	Kecimen
75166	406.691	243.032	0.801805	78789	0.68413	1121.79	Kecimen
90856	442.267	266.328	0.798354	93717	0.637613	1208.58	Kecimen
45928	286.541	208.76	0.684989	47336	0.699599	844.162	Kecimen
79408	352.191	290.828	0.564011	81463	0.792772	1073.25	Kecimen
49242	318.125	200.122	0.777351	51368	0.658456	881.836	Kecimen
42492	310.146	176.131	0.823099	43904	0.665894	823.796	Kecimen
60952	332.455	235.43	0.706058	62329	0.743598	933.366	Kecimen
42256	323.19	172.576	0.845499	44743	0.698031	849.728	Kecimen
64380	366.965	227.772	0.784056	66125	0.664376	981.544	Kecimen
80437	449.455	232.326	0.856043	84460	0.674236	1176.31	Kecimen
43725	301.322	186.951	0.784258	45021	0.697068	818.873	Kecimen
43441	276.611	201.813	0.683882	45133	0.690856	803.748	Kecimen
76792	338.858	291.359	0.510584	78842	0.772322	1042.77	Kecimen
74167	387.799	247.858	0.76909	76807	0.680182	1084.73	Kecimen
33565	261.554	167.708	0.767374	35794	0.681551	751.413	Kecimen
64670	403.084	206.485	0.858829	66419	0.756773	1028.44	Kecimen
64762	354.294	235.752	0.746474	66713	0.694998	981.509	Kecimen
43295	304.284	182.811	0.799407	44714	0.713838	814.68	Kecimen
70699	418.699	216.596	0.855799	72363	0.728075	1061.32	Kecimen
69726	354.177	252.529	0.701161	71849	0.734399	1035.5	Kecimen
57346	330.478	222.444	0.739555	59365	0.723609	928.272	Kecimen
82028	397.115	268.334	0.737169	84427	0.686375	1106.36	Kecimen
61251	301.508	273.66	0.419754	64732	0.643596	971.769	Kecimen
96277	447.135	275.216	0.788128	97865	0.704057	1181.92	Kecimen
75620	368.224	263.459	0.698627	77493	0.726277	1059.19	Kecimen
73167	340.055	276.015	0.584106	74545	0.778737	1010.47	Kecimen
60847	336.924	231.466	0.72666	62492	0.698588	964.603	Kecimen
81021	347.75	297.641	0.517135	82552	0.75756	1063.87	Kecimen
59902	358.592	222.902	0.783332	63250	0.744124	982.788	Kecimen
88745	429.77	265.69	0.786009	90715	0.752064	1162.88	Kecimen
41809	307.533	175.086	0.822114	43838	0.697444	828.697	Kecimen
75329	364.231	265.867	0.68351	77541	0.72308	1075.79	Kecimen
61600	350.183	225.843	0.764243	63397	0.74683	972.472	Kecimen
46427	253.842	235.907	0.369212	48275	0.684219	844.312	Kecimen
40861	249.74	213.573	0.518328	43096	0.743089	784.912	Kecimen
55827	305.299	234.661	0.639696	57724	0.703288	926.095	Kecimen
54182	366.067	192.013	0.851391	56450	0.611418	968.729	Kecimen
77468	405.937	245.99	0.795479	79220	0.721545	1100.68	Kecimen
49882	287.264	222.186	0.633852	50880	0.766378	843.764	Kecimen
95245	397.094	307.274	0.633422	97988	0.753044	1201.39	Kecimen
71464	364.103	253.797	0.717026	73265	0.715484	1036.94	Kecimen
77055	375.25	262.812	0.713784	79255	0.732267	1095.28	Kecimen
92384	368.406	320.715	0.492087	93772	0.749007	1135.66	Kecimen
77310	436.53	228.28	0.852367	80138	0.631721	1141.19	Kecimen
57580	330.228	232.055	0.711475	60232	0.645103	992.114	Kecimen
69708	375.447	239.133	0.770924	71321	0.727178	1022.57	Kecimen
41502	260.513	205.865	0.61281	43114	0.824319	790.427	Kecimen
45800	330.009	181.666	0.834843	47802	0.732683	870.387	Kecimen
52623	311.997	218.041	0.715261	54175	0.675191	902.624	Kecimen
44939	317.617	183.315	0.816632	46400	0.656178	845.786	Kecimen
114648	508.129	288.954	0.822571	118314	0.681905	1340.9	Kecimen
65727	403.194	210.073	0.853543	67372	0.616981	1030.15	Kecimen
45683	333.263	177.772	0.845844	48787	0.634231	901.102	Kecimen
111450	478.311	298.631	0.78115	113256	0.690093	1298.19	Kecimen
47581	306.812	203.098	0.749538	49203	0.667775	861.58	Kecimen
57127	311.645	238.642	0.643138	59943	0.693626	952.023	Kecimen
53006	333.381	206.881	0.784165	55456	0.691695	936.371	Kecimen
69060	328.489	275.889	0.542783	72223	0.727024	1039.55	Kecimen
25387	225.63	144.619	0.767577	26139	0.678144	619.074	Kecimen
66774	348.558	246.476	0.707082	69097	0.692446	1003.37	Kecimen
47839	312.601	198.751	0.771855	50166	0.702771	868.06	Kecimen
78571	443.822	228.758	0.856934	81718	0.642193	1157.33	Kecimen
64717	342.577	245.732	0.696759	66649	0.662541	997.989	Kecimen
60462	373.343	208.109	0.830231	62213	0.665683	990.547	Kecimen
59370	345.949	221.922	0.767134	61464	0.697486	981.517	Kecimen
54056	332.268	208.619	0.778323	55539	0.674553	912.153	Kecimen
89235	443.516	258.947	0.811862	91201	0.655191	1179.69	Kecimen
51727	321.127	208.767	0.759843	52913	0.75189	903.308	Kecimen
71595	387.31	236.751	0.791421	74045	0.718537	1069.77	Kecimen
95347	451.526	280.226	0.784111	99256	0.674956	1255.24	Kecimen
60449	383.8	208.169	0.840128	64346	0.676345	1054.2	Kecimen
69006	379.318	241.85	0.770374	72895	0.697453	1086.86	Kecimen
68520	373.236	237.042	0.772431	70759	0.712859	1049.09	Kecimen
52731	309.977	219.725	0.705366	54438	0.69588	894.48	Kecimen
50570	311.345	208.318	0.743181	51743	0.720863	873.777	Kecimen
75825	391.204	248.5	0.772332	77437	0.74537	1081.34	Kecimen
42637	293.43	189.432	0.763693	44052	0.725119	814.182	Kecimen
76984	425.048	233.973	0.834859	78641	0.758755	1091.75	Kecimen
47851	323.153	191.611	0.805245	49187	0.773237	860.402	Kecimen
51220	328.648	202.509	0.787599	52903	0.692471	896.728	Kecimen
53890	331.086	216.579	0.756367	57109	0.704444	957.132	Kecimen
58650	346.339	219.684	0.773083	62380	0.660287	991.612	Kecimen
98935	387.517	326.899	0.537015	100747	0.740421	1176.6	Kecimen
77587	396.808	251.945	0.77257	79970	0.703865	1100.84	Kecimen
180898	843.957	323.191	0.92377	221396	0.454189	2253.56	Kecimen
71266	390.707	235.687	0.797566	73002	0.660629	1034.18	Kecimen
39457	267.557	188.765	0.708696	40472	0.697576	755.822	Kecimen
35237	267.554	173.525	0.761162	37418	0.706832	750.909	Kecimen
49059	301.8	210.467	0.716709	50835	0.698607	867.582	Kecimen
53896	319.072	217.696	0.731093	55392	0.745945	889.626	Kecimen
56469	325.341	225.115	0.72196	58697	0.685736	933.896	Kecimen
85156	422.279	260.211	0.787586	87057	0.702561	1140.68	Kecimen
67044	361.255	238.226	0.751757	68626	0.756944	989.016	Kecimen
52243	331.451	206.76	0.781583	55774	0.714434	934.547	Kecimen
38968	269.402	185.728	0.724374	40147	0.737583	769.242	Kecimen
79661	360.073	282.739	0.619209	81032	0.779157	1045.66	Kecimen
59282	329.243	233.775	0.704164	60580	0.725926	920.573	Kecimen
48177	305.785	202.466	0.749397	49877	0.677643	860.548	Kecimen
74904	342.896	280.116	0.576765	75898	0.731742	1012.37	Kecimen
81581	424.278	245.507	0.815578	83143	0.762382	1114.74	Kecimen
57820	376.191	199.797	0.847306	59968	0.71478	978.85	Kecimen
57808	309.972	241.367	0.62743	58954	0.710347	911.857	Kecimen
55306	353.155	204.127	0.81603	57396	0.74399	973.259	Kecimen
59459	347.155	222.109	0.768542	61585	0.709619	966.329	Kecimen
44247	319.79	178.648	0.82941	45872	0.677637	842.121	Kecimen
48945	269.37	239.162	0.460121	51456	0.711244	872.289	Kecimen
68864	343.676	261.988	0.64721	71726	0.698347	1035.02	Kecimen
82826	396.706	269.763	0.733205	84981	0.745435	1115.81	Kecimen
65396	331.538	253.243	0.645403	66783	0.76483	975.425	Kecimen
81572	393.716	265.815	0.737687	84964	0.698271	1187.34	Kecimen
44367	322.504	176.709	0.836526	46531	0.733	883.973	Kecimen
51448	328.29	202.16	0.787903	52772	0.704806	877.799	Kecimen
50545	286.871	227.16	0.610713	51771	0.835455	847.664	Kecimen
94063	448.121	276.608	0.786758	99085	0.709294	1259.45	Kecimen
84129	413.035	261.643	0.773771	86242	0.713835	1144.97	Kecimen
79735	410.998	250.221	0.793314	83306	0.749044	1154.54	Kecimen
90176	390.207	294.762	0.655265	91793	0.762549	1136.67	Kecimen
61492	356.426	224.163	0.777471	65298	0.690844	1013.2	Kecimen
79532	367.526	277.224	0.656532	81603	0.735114	1075.27	Kecimen
69302	354.964	254.453	0.697236	71843	0.701153	1051.02	Kecimen
52266	320.443	213.857	0.744716	54116	0.684289	923.19	Kecimen
51180	288.631	226.63	0.619254	52396	0.737443	855.997	Kecimen
55787	333.703	226.951	0.733121	59520	0.688592	977.425	Kecimen
96064	411.207	303.232	0.675434	99609	0.731331	1223.9	Kecimen
54316	351.805	198.418	0.825776	55960	0.655895	930.627	Kecimen
70941	326.011	278.103	0.521835	72330	0.760109	993.05	Kecimen
55770	293.581	243.481	0.558732	57633	0.740166	900.109	Kecimen
47478	299.819	205.296	0.728793	48900	0.720915	861.179	Kecimen
88197	473.287	238.738	0.863455	90297	0.658457	1193.28	Kecimen
74728	355.311	270.741	0.647596	76287	0.766677	1048.67	Kecimen
70788	362.651	249.404	0.725972	71954	0.746158	1003.77	Kecimen
48894	318.099	197.496	0.78392	50468	0.663816	875.174	Kecimen
52051	313.703	213.632	0.732284	53550	0.695051	893.451	Kecimen
53270	336.149	204.307	0.7941	55288	0.693692	922.011	Kecimen
57227	354.431	207.595	0.810518	59307	0.649982	953.496	Kecimen
97026	455.972	273.054	0.800869	99561	0.671205	1212.67	Kecimen
58495	368.74	205.758	0.829839	61496	0.630103	998.437	Kecimen
53758	359.532	193.401	0.842993	57197	0.710295	965.068	Kecimen
110616	461.145	306.899	0.746384	112150	0.752398	1252.88	Kecimen
49175	281.431	224.486	0.603111	50672	0.727613	845.128	Kecimen
53698	348.223	197.753	0.823104	56089	0.731341	938.705	Kecimen
73125	408.941	231.219	0.82481	75540	0.656513	1096.75	Kecimen
50445	308.359	208.855	0.735696	51555	0.723226	851.632	Kecimen
46742	303.555	199.446	0.753861	48077	0.705263	847.792	Kecimen
69317	393.399	228.723	0.813617	72170	0.661674	1066.39	Kecimen
75314	392.652	246.076	0.779259	77118	0.704712	1073.77	Kecimen
54428	339.115	206.646	0.792887	56175	0.723392	922.878	Kecimen
39509	286.232	180.437	0.776279	41446	0.722972	790.531	Kecimen
66568	342.25	249.55	0.684358	68078	0.759917	993.455	Kecimen
45264	290.588	203.319	0.714455	48142	0.656914	879.832	Kecimen
57980	336.313	222.61	0.749581	59311	0.777295	925.795	Kecimen
75114	368.73	262.474	0.702348	77454	0.740915	1051.27	Kecimen
78991	362.641	279.091	0.638518	80355	0.708897	1071.38	Kecimen
76253	364.226	269.517	0.672637	78443	0.724288	1070.05	Kecimen
83229	423.844	253.809	0.800879	86345	0.653494	1153.43	Kecimen
45962	251.133	235.368	0.34873	47173	0.74228	810.195	Kecimen
57766	344.737	215.11	0.781439	59834	0.737583	950.721	Kecimen
39669	252.748	202.264	0.599653	41860	0.66304	791.464	Kecimen
41050	316.842	167.328	0.849174	42965	0.641186	846.833	Kecimen
47771	311.525	197.091	0.774426	49237	0.683409	857.776	Kecimen
53389	301.846	228.517	0.653341	55158	0.715747	906.666	Kecimen
73319	392.363	239.188	0.792701	75653	0.709568	1075.28	Kecimen
91831	463.358	257.951	0.830714	95560	0.71037	1252.76	Kecimen
71452	397.961	239.799	0.798068	73864	0.751833	1101.5	Kecimen
59970	353.002	219.683	0.782756	61834	0.755823	978.631	Kecimen
51683	325.24	208.915	0.766419	54510	0.728443	928.217	Kecimen
41283	268.125	199.635	0.667556	42505	0.732384	798.515	Kecimen
92735	436.986	271.579	0.783428	94693	0.704122	1183.45	Kecimen
44627	297.259	194.76	0.755467	46921	0.675185	848.487	Kecimen
84260	411.397	262.974	0.769023	85978	0.686783	1157	Kecimen
59076	350.487	216.679	0.786003	61643	0.645498	988.273	Kecimen
58741	345.485	222.382	0.765295	60701	0.714819	948.233	Kecimen
68627	411.889	216.894	0.850123	70932	0.738242	1097.29	Kecimen
51941	349.226	191.817	0.835649	53893	0.708995	912.259	Kecimen
77161	394.278	253.211	0.766525	82746	0.6719	1127.41	Kecimen
85105	382.29	288.758	0.655335	88056	0.776945	1139.45	Kecimen
52508	297.697	226.252	0.649914	53588	0.756164	862.778	Kecimen
39941	251.848	208.468	0.56109	41594	0.707572	777.663	Kecimen
48693	306.574	204.281	0.745653	50298	0.740128	848.422	Kecimen
87858	441.224	255.662	0.815016	90905	0.708727	1176.29	Kecimen
67718	373.924	233.233	0.781628	71102	0.736994	1024.99	Kecimen
63968	333.012	247.889	0.667754	65403	0.757	953.445	Kecimen
43461	333.706	169.31	0.861733	45669	0.677934	867.446	Kecimen
81546	381.349	273.81	0.696038	82807	0.71172	1057.45	Kecimen
43563	296.522	188.196	0.772778	45174	0.696284	817.41	Kecimen
36145	280.758	166.594	0.804929	37401	0.812265	747.161	Kecimen
57741	316.484	234.284	0.67231	58976	0.712711	906.829	Kecimen
69024	372.822	237.66	0.770482	70649	0.721043	1015.77	Kecimen
78982	421.162	241.64	0.819032	81442	0.753437	1102.42	Kecimen
78240	401.93	249.831	0.783351	79677	0.757993	1059.64	Kecimen
87036	384.97	289.454	0.659292	88336	0.727896	1094.59	Kecimen
37569	232.428	208.152	0.44495	38874	0.794371	734.102	Kecimen
79748	441.934	231.718	0.851518	81718	0.738448	1120.96	Kecimen
44156	307.707	186.092	0.796399	45285	0.633606	820.714	Kecimen
87302	392.91	284.179	0.690568	89605	0.738246	1122.16	Kecimen
69312	373.803	237.195	0.772887	70719	0.706156	1001.24	Kecimen
86545	350.128	315.72	0.432307	87512	0.785887	1070.06	Kecimen
59729	337.043	231.809	0.725926	62511	0.683711	966.438	Kecimen
59822	336.584	227.95	0.735759	60648	0.700287	916.044	Kecimen
63452	334.846	243.236	0.687258	64925	0.735317	945.523	Kecimen
61996	333.748	243.54	0.683753	63641	0.673138	958.627	Kecimen
74763	391.227	245.542	0.77852	77508	0.686113	1063.38	Kecimen
73193	401.072	235.829	0.808864	75563	0.740116	1050.91	Kecimen
66508	344.905	249.09	0.691685	69240	0.703015	1001.71	Kecimen
74849	379.925	252.617	0.746921	76154	0.735393	1040.79	Kecimen
38585	274.445	180.958	0.751829	39926	0.696593	762.439	Kecimen
61377	339.733	234.024	0.724907	64027	0.705613	975.553	Kecimen
39547	259.423	198.466	0.643997	40765	0.733384	763.979	Kecimen
49998	301.781	212.327	0.710616	50857	0.779295	834.328	Kecimen
49063	294.748	217.913	0.673355	50732	0.658811	869.795	Kecimen
46961	343.789	177.137	0.85704	48476	0.614633	891.528	Kecimen
57271	372.699	196.976	0.848926	58786	0.769151	949.936	Kecimen
58909	347.344	218.123	0.778235	60379	0.704257	944.879	Kecimen
51336	321.884	206.146	0.768012	53944	0.742601	898.546	Kecimen
62422	324.557	247.708	0.646141	64021	0.716062	947.541	Kecimen
48447	331.051	189.917	0.81908	49996	0.625615	883.044	Kecimen
64364	376.662	221.655	0.808518	67510	0.654744	1057.9	Kecimen
72915	414.718	229.556	0.832834	76912	0.679771	1131.1	Kecimen
49414	290.458	219.418	0.65524	51029	0.711034	869.188	Kecimen
45723	291.197	203.02	0.716885	48658	0.648829	875.764	Kecimen
64988	371.354	226.91	0.791604	67847	0.670118	1048.19	Kecimen
56709	293.408	247.717	0.535915	58143	0.778286	904.508	Kecimen
93559	438.634	275.583	0.777991	95750	0.68707	1198.26	Kecimen
81916	398.327	265.418	0.745654	85615	0.663073	1113.14	Kecimen
79274	406.976	255.218	0.778933	81976	0.708385	1110.38	Kecimen
88724	446.43	260.379	0.812296	92630	0.656529	1216.54	Kecimen
65469	374.466	227.539	0.794216	68018	0.714438	1020.03	Kecimen
75799	340.983	289.15	0.53001	79230	0.7411	1065.19	Kecimen
76741	383.982	258.134	0.74032	79198	0.745203	1056.74	Kecimen
54219	344.291	204.497	0.804491	56526	0.688495	931.43	Kecimen
52693	283.504	242.114	0.520265	54860	0.737749	895.745	Kecimen
84539	441.529	248.374	0.826775	87728	0.687577	1169.98	Kecimen
34559	264.515	168.983	0.769339	36516	0.664187	750.365	Kecimen
49715	302.347	213.365	0.708517	52250	0.650107	877.43	Kecimen
39716	243.038	210.114	0.50258	40598	0.779433	737.468	Kecimen
46845	264.967	225.842	0.522986	47739	0.759091	799.991	Kecimen
52547	358.366	189.207	0.849262	54649	0.703403	929.471	Kecimen
41593	310.675	178.323	0.818865	44753	0.57267	870.063	Kecimen
44460	294.624	197.557	0.741875	47486	0.647425	849.225	Kecimen
51145	317.348	211.026	0.746874	53531	0.710051	895.04	Kecimen
43345	323.859	175.186	0.841066	46785	0.649276	877.02	Kecimen
53987	331.351	213.167	0.76559	56076	0.673222	931.117	Kecimen
59514	368.638	209.127	0.823514	61469	0.755158	968.36	Kecimen
85739	380.37	288.256	0.652452	87052	0.762152	1094.58	Kecimen
56096	313.386	232.282	0.671282	58701	0.71177	929.115	Kecimen
46120	300.097	201.206	0.741936	49996	0.628972	907.025	Kecimen
57676	333.97	222.274	0.746351	58991	0.688669	926.255	Kecimen
62064	352.369	227.864	0.762775	64811	0.650566	1004.25	Kecimen
50274	305.397	212.273	0.718939	52016	0.687508	868.951	Kecimen
77225	362.137	277.01	0.644113	80872	0.732483	1110.44	Kecimen
45598	259.896	225.656	0.496118	47266	0.741286	813.276	Kecimen
38545	283.988	175.421	0.78641	39765	0.760436	770.59	Kecimen
39439	246.764	212.635	0.507424	42795	0.646827	793.005	Kecimen
74109	416.713	230.56	0.832994	78032	0.706459	1095.06	Kecimen
41755	296.788	184.191	0.784115	43362	0.691331	804.559	Kecimen
61463	369.4	213.62	0.815832	63117	0.786777	966.493	Kecimen
43743	300.906	185.851	0.786462	44836	0.670083	802.261	Kecimen
73499	346.051	275.514	0.605079	76355	0.731246	1050.01	Kecimen
40403	289.259	179.223	0.784922	41209	0.722204	761.949	Kecimen
62343	348.289	232.82	0.743741	63897	0.705621	979.447	Kecimen
46008	296.879	212.028	0.699954	48762	0.695279	860.58	Kecimen
43495	271.647	205.164	0.655424	44535	0.754022	785.843	Kecimen
50649	327.111	199.541	0.792394	52462	0.766294	875.267	Kecimen
61235	349.026	226.803	0.760091	63504	0.718721	974.079	Kecimen
78883	395.1	256.965	0.75961	80973	0.678447	1092.71	Kecimen
58734	367.484	205.021	0.829905	59845	0.757477	945.191	Kecimen
68253	388.455	224.732	0.815663	70347	0.74613	1042.26	Kecimen
62401	394.398	203.139	0.857154	64722	0.740085	1004.35	Kecimen
73046	397.338	234.828	0.806669	74242	0.690651	1037.4	Kecimen
54968	300.954	234.39	0.627246	56851	0.75134	893.644	Kecimen
84057	452.776	245.22	0.840641	86710	0.622018	1179.02	Kecimen
90178	466.249	250.104	0.843953	92321	0.752003	1180.48	Kecimen
67883	383.189	233.357	0.793181	70360	0.69781	1030.87	Kecimen
43901	304.1	191.298	0.777354	46443	0.648742	884.495	Kecimen
33662	227.294	191.109	0.541343	34787	0.792999	699.415	Kecimen
77043	388.693	257.546	0.748977	80094	0.72693	1112.21	Kecimen
64875	393.215	212.955	0.840653	67701	0.770524	1014.79	Kecimen
42609	280.149	200.272	0.699251	44944	0.673128	840.167	Kecimen
79510	380.719	267.034	0.712774	81779	0.731597	1075.31	Kecimen
58857	320.812	235.386	0.679452	60597	0.690364	927.048	Kecimen
67754	349.197	251.68	0.693208	69536	0.655261	1032.36	Kecimen
54842	308.232	227.258	0.675573	55879	0.738195	887.109	Kecimen
78352	408.81	245.441	0.799716	80474	0.684273	1099.51	Kecimen
72447	401.742	231.537	0.817215	74481	0.709104	1055.3	Kecimen
58239	324.295	230.997	0.701869	59977	0.72119	940.22	Kecimen
93879	409.487	292.916	0.698792	96072	0.767669	1174.17	Kecimen
68129	381.175	230.056	0.79733	70141	0.659704	1050.87	Kecimen
74426	411.697	231.75	0.826516	76449	0.679454	1071.61	Kecimen
60650	324.362	242.229	0.665065	62580	0.721543	941.486	Kecimen
136340	722.854	311.341	0.90249	176818	0.529774	2098.26	Kecimen
65051	381.214	218.217	0.819956	66476	0.644356	1002.03	Kecimen
72219	376.65	249.529	0.749065	74373	0.777795	1050.22	Kecimen
81405	421.095	248.087	0.808026	83634	0.713728	1148.65	Kecimen
70196	373.198	243.881	0.756935	71937	0.69079	1024.26	Kecimen
69120	352.011	250.815	0.701653	70274	0.70344	978.434	Kecimen
56327	297.766	241.934	0.582962	58178	0.727739	915.496	Kecimen
54983	292.899	248.408	0.529834	58095	0.725274	921.613	Kecimen
105020	440.39	306.105	0.718934	107423	0.714616	1228.37	Kecimen
36113	257.642	181.157	0.711056	37442	0.694481	737.637	Kecimen
87429	408.926	273.888	0.742565	89063	0.703575	1120.02	Kecimen
57785	314.431	236.183	0.660138	58867	0.732866	903.769	Kecimen
69846	368.451	243.975	0.749358	72585	0.676724	1040.72	Kecimen
81456	404.316	258.892	0.768108	83499	0.725472	1103.15	Kecimen
61959	339.585	234.698	0.722729	64424	0.712041	970.754	Kecimen
61730	376.189	210.612	0.82859	63756	0.632188	989.499	Kecimen
62835	421.169	191.17	0.891051	64406	0.786145	1018.55	Kecimen
52651	340.817	204.433	0.800126	56217	0.683504	915.939	Kecimen
67093	353.11	243.001	0.725546	68383	0.760692	972.971	Kecimen
45160	270.555	220.119	0.581452	46805	0.686072	833.117	Kecimen
58989	362.668	209.51	0.816256	60916	0.732783	950.717	Kecimen
44007	359.376	161.702	0.893052	48490	0.644744	901.17	Kecimen
65062	344.31	242.684	0.709365	65825	0.769218	948.889	Kecimen
38724	291.001	170.776	0.80969	40133	0.780883	769.691	Kecimen
63514	368.786	221.241	0.800063	65057	0.663845	977.085	Kecimen
46403	306.304	196.617	0.766787	48631	0.637632	843.96	Kecimen
55746	280.313	254.6	0.418382	56989	0.730654	875.659	Kecimen
38153	265.04	184.802	0.716817	39564	0.682498	754.022	Kecimen
66094	323.188	261.012	0.589707	67032	0.73872	944.713	Kecimen
57303	330.025	221.92	0.740158	58973	0.716762	919.044	Kecimen
61289	376.375	208.728	0.832135	63997	0.63948	998.47	Kecimen
55114	317.172	222.753	0.711871	56849	0.714254	909.604	Kecimen
45567	278.502	216.767	0.627855	49075	0.714071	854.724	Kecimen
72215	380.415	244.028	0.767141	74175	0.720924	1048.49	Kecimen
65495	365.319	230.526	0.775762	67299	0.697943	989.581	Kecimen
34977	267.738	170.837	0.769973	37747	0.66948	754.366	Kecimen
76407	373.442	264.474	0.706005	79086	0.731251	1074.7	Kecimen
66998	338.587	257.344	0.649861	69844	0.757605	1006.22	Kecimen
57310	351.396	209.881	0.802035	59225	0.699833	940.413	Kecimen
79106	404.573	252.066	0.782188	81999	0.728517	1100.85	Kecimen
56837	368.373	198.775	0.84192	59040	0.634965	973.599	Kecimen
53497	352.503	194.981	0.833093	54875	0.691176	921.762	Kecimen
58591	356.463	212.119	0.803677	60664	0.784414	970.932	Kecimen
60313	339.603	227.726	0.741851	62130	0.72668	946.487	Kecimen
72483	334.418	282.681	0.534303	74945	0.70618	1052.16	Kecimen
52836	340.405	204.336	0.799796	55143	0.817389	928.274	Kecimen
68119	385.392	230.715	0.80101	70719	0.659301	1026.69	Kecimen
83490	421.883	254.31	0.797894	86319	0.709949	1168.25	Kecimen
74612	430.865	229.287	0.846647	79297	0.665347	1140.4	Kecimen
44081	328.587	173.347	0.849522	46287	0.638466	867.003	Kecimen
39724	271.666	189.485	0.716593	41587	0.724283	781.97	Kecimen
89051	418.556	274.923	0.754032	92636	0.738675	1196.03	Kecimen
57612	352.441	210.064	0.802965	58810	0.647719	934.684	Kecimen
65740	348.881	245.976	0.709165	69233	0.740816	1036.52	Kecimen
69997	362.741	247.091	0.732118	71994	0.722542	1010.81	Kecimen
75540	422.098	237.639	0.826461	78465	0.705085	1114.88	Kecimen
46397	310.724	192.904	0.783953	48183	0.655279	850.782	Kecimen
61967	364.784	218.566	0.800625	63724	0.6873	981.059	Kecimen
87149	444.611	253.207	0.82199	91704	0.716221	1189.48	Kecimen
67798	418.408	207.826	0.867919	69356	0.691027	1073.14	Kecimen
49604	310.606	204.655	0.75224	51007	0.760809	855.392	Kecimen
88407	412.757	275.285	0.74511	90865	0.717962	1141.3	Kecimen
46601	277.353	216.272	0.626065	48457	0.761653	820.106	Kecimen
53121	350.968	195.867	0.829789	56120	0.732663	930.619	Kecimen
80101	377.617	272.671	0.691804	82949	0.725487	1084.31	Kecimen
69781	364.745	248.796	0.731249	71504	0.693938	1024.21	Kecimen
58460	290.754	258.384	0.458545	60254	0.774756	908.357	Kecimen
61792	400.503	197.704	0.869667	64962	0.701162	1026.11	Kecimen
78084	395.21	254.377	0.76532	80285	0.703003	1097.3	Kecimen
63402	372.484	224.009	0.798953	66639	0.676634	1008.28	Kecimen
48809	332.265	190.351	0.819632	51847	0.661342	928.016	Kecimen
49039	285.402	220.82	0.633534	50879	0.714771	841.666	Kecimen
64669	364.583	228.801	0.778561	67524	0.655846	995.692	Kecimen
103377	460.67	287.993	0.780496	105569	0.726968	1230.23	Kecimen
73972	359.273	263.333	0.680269	75353	0.754739	1017.75	Kecimen
47602	296.493	206.225	0.718479	49089	0.721188	840.545	Kecimen
69151	341.646	258.393	0.654205	70703	0.751846	989.917	Kecimen
56518	319.192	230.71	0.691064	58879	0.718647	916.396	Kecimen
86314	390.413	282.215	0.690992	87873	0.733663	1106.03	Kecimen
56477	334.588	219.186	0.75555	58408	0.685667	941.429	Kecimen
32097	264.416	157.99	0.801864	33699	0.681118	713.775	Kecimen
71284	356.259	256.488	0.694027	72618	0.742975	1011.05	Kecimen
87937	365.837	307.912	0.540002	89581	0.71101	1099.57	Kecimen
100835	419.753	306.955	0.682083	102881	0.752579	1202.37	Kecimen
66752	370.504	231.551	0.780654	69039	0.74239	1006.03	Kecimen
65999	326.299	264.415	0.585952	67971	0.676864	998.793	Kecimen
70977	362.064	256.383	0.706096	73417	0.650223	1033.87	Kecimen
38569	272.937	181.857	0.745688	39909	0.716031	757.295	Kecimen
53964	368.074	189.814	0.856772	55662	0.603678	943.599	Kecimen
79100	413.496	246.405	0.803055	81839	0.655148	1113.61	Kecimen
83071	400.466	265.929	0.747689	84531	0.718458	1112.78	Kecimen
31237	262.347	155.026	0.806731	32564	0.613911	718.847	Kecimen
26908	245.756	143.711	0.811198	28607	0.693487	678.815	Kecimen
66797	358.199	240.783	0.740366	68732	0.697663	1006.38	Kecimen
76222	388.807	250.696	0.764366	77958	0.737442	1065.68	Kecimen
46810	297.891	201.535	0.736407	48300	0.721308	836.109	Kecimen
65123	382.358	218.889	0.819925	66825	0.764337	1018.35	Kecimen
65091	392.493	216.828	0.833555	69597	0.664194	1079.75	Kecimen
68400	363.507	249.581	0.727041	72981	0.725745	1079.97	Kecimen
64056	393.617	209.631	0.846382	65958	0.767873	1014.27	Kecimen
49821	319.082	202.236	0.773491	51829	0.677975	907.423	Kecimen
80353	394.34	264.579	0.741511	83419	0.668022	1120.78	Kecimen
51539	330.747	200.958	0.794253	53060	0.725411	894.039	Kecimen
63827	393.252	209.146	0.846846	66445	0.667409	1047.04	Kecimen
89345	435.551	262.061	0.798739	91337	0.713846	1176.66	Kecimen
31275	264.687	156.396	0.806767	33540	0.658393	727.561	Kecimen
75431	433.671	222.999	0.857662	78125	0.723184	1103.24	Kecimen
72718	397.903	235.56	0.805935	74803	0.746867	1073.92	Kecimen
82886	424.823	253.172	0.803024	85879	0.648281	1163.53	Kecimen
67852	353.124	247.335	0.713731	69587	0.729513	983.385	Kecimen
49336	338.481	193.005	0.8215	52619	0.656553	909.681	Kecimen
39368	296.656	171.208	0.816654	41361	0.619969	798.546	Kecimen
51304	350.043	189.765	0.8403	52949	0.660998	897.111	Kecimen
91764	433.768	270.286	0.782133	93480	0.692925	1165.08	Kecimen
79252	398.845	254.173	0.770638	80799	0.705007	1074.11	Kecimen
50530	328.918	198.284	0.797864	52600	0.681696	897.796	Kecimen
66063	354.098	238.51	0.739121	67503	0.762676	971.938	Kecimen
73311	391.868	239.602	0.791294	74825	0.689966	1046.52	Kecimen
82793	428.117	249.391	0.812809	84950	0.742458	1130.67	Kecimen
104921	452.863	297.024	0.754864	108211	0.726298	1254.86	Kecimen
59654	350.9	219.49	0.78022	62384	0.713053	979.727	Kecimen
76531	407.669	241.4	0.80583	78857	0.731227	1068.38	Kecimen
57438	344.98	215.434	0.781038	58924	0.693394	935.816	Kecimen
55129	336.022	210.428	0.779636	56855	0.750402	910.837	Kecimen
37302	284.33	170.533	0.800172	39280	0.721174	761.131	Kecimen
58357	338.321	220.464	0.758526	59383	0.738173	915.379	Kecimen
33615	254.472	171.001	0.740566	35376	0.788049	719.935	Kecimen
47555	330.899	186.253	0.826546	50165	0.680709	873.837	Kecimen
71762	387.674	236.874	0.791621	73593	0.701678	1038.74	Kecimen
84677	401.668	269.668	0.741121	86777	0.751029	1119	Kecimen
86421	367.17	300.794	0.573477	87929	0.748623	1080.01	Kecimen
90191	431.367	272.751	0.774727	93719	0.625024	1179.37	Kecimen
34638	251.742	178.341	0.705784	35824	0.7494	713.94	Kecimen
39275	274.066	185.411	0.736424	40747	0.712562	772.501	Kecimen
41458	281.825	192.674	0.729795	42792	0.682773	782.362	Kecimen
85954	405.915	272.083	0.742094	87690	0.714818	1104.72	Kecimen
56589	343.935	213.133	0.784846	58274	0.659853	931.451	Kecimen
39622	280.112	185.192	0.750267	40539	0.733008	766.531	Kecimen
48093	329.936	187.042	0.823784	49367	0.745108	858.386	Kecimen
67404	349.011	247.69	0.704513	69607	0.745026	997.276	Kecimen
57838	350.285	214.802	0.789911	59449	0.67404	939.149	Kecimen
58570	355.4	214.567	0.797184	60494	0.657558	962.708	Kecimen
60199	375.28	205.414	0.836896	61711	0.736289	971.185	Kecimen
74254	402.526	241.283	0.800433	76702	0.72647	1080.03	Kecimen
63718	407.566	200.261	0.870957	65950	0.722967	1023.06	Kecimen
28216	245.401	150.246	0.790669	30316	0.622293	683.004	Kecimen
79055	395.369	258.276	0.757139	82562	0.719506	1114.49	Kecimen
86141	414.107	266.908	0.764573	87883	0.71874	1146.16	Kecimen
82873	449.409	239.614	0.846005	85648	0.700769	1148.36	Kecimen
98485	387.763	325.737	0.542521	100682	0.729865	1193.91	Kecimen
53633	313.48	218.669	0.716534	55147	0.728432	882.669	Kecimen
63191	335.242	243.972	0.685842	64898	0.704604	977.095	Kecimen
58545	325.189	231.956	0.700863	60738	0.7005	966.758	Kecimen
68931	381.672	231.528	0.794995	71336	0.679311	1067.69	Kecimen
67874	360.023	243.272	0.737166	69889	0.678319	1035.28	Kecimen
61200	323.174	246.288	0.64747	64553	0.707449	997.264	Kecimen
87089	396.487	280.245	0.707392	88754	0.742232	1154.56	Kecimen
59589	383.571	201.382	0.851091	62974	0.684082	1043.19	Kecimen
50312	354.236	182.312	0.857392	52070	0.623352	961.439	Kecimen
41995	259.209	210.351	0.584337	43443	0.729701	801.526	Kecimen
137583	649.541	273.26	0.907201	142650	0.731638	1590.35	Besni
117592	533.293	288.558	0.840966	123587	0.730068	1432.01	Besni
95546	487.178	251.96	0.855875	99166	0.722782	1276.81	Besni
96582	446.705	278.325	0.782172	100113	0.706598	1216.98	Besni
61409	403.701	209.366	0.855007	67286	0.597393	1083.48	Besni
154242	585.928	337.599	0.817324	158371	0.7216	1530.32	Besni
134303	600.766	288.385	0.877253	138133	0.742436	1497.52	Besni
112378	528.4	272.779	0.856447	115602	0.614705	1366.74	Besni
124579	439.961	371.026	0.537416	128307	0.69825	1373.54	Besni
83107	507.381	233.154	0.888165	93706	0.491002	1367.33	Besni
107178	508.748	270.462	0.846981	110611	0.632909	1325.95	Besni
64391	449.556	187.122	0.909256	68813	0.634269	1177.71	Besni
126781	659.443	249.545	0.925635	132802	0.736662	1552.54	Besni
45051	323.589	180.07	0.830864	46532	0.830632	836.625	Besni
119026	612.744	250.927	0.912304	123463	0.615745	1486.77	Besni
67579	402.31	217.059	0.841966	70809	0.703113	1051.55	Besni
97019	559.599	228.642	0.912722	101539	0.573453	1383.65	Besni
184784	740.109	320.588	0.901316	192699	0.645353	1791.57	Besni
168276	656.099	328.487	0.86564	174282	0.681539	1685.28	Besni
195383	755.013	335.79	0.895656	204472	0.728769	1893.41	Besni
65253	418.998	205.756	0.871122	69700	0.666255	1075.4	Besni
120255	471.814	326.546	0.721793	123486	0.723887	1322.81	Besni
108161	485.103	286.033	0.80767	111765	0.707906	1305.14	Besni
157877	613.874	328.313	0.844965	161901	0.641323	1604.1	Besni
83800	440.834	245.382	0.83076	86346	0.657162	1170.09	Besni
177264	619.958	366.763	0.806237	180994	0.683219	1652.69	Besni
127245	530.304	309.122	0.812534	130649	0.679096	1424	Besni
108314	455.606	311.171	0.730434	112497	0.686945	1306.58	Besni
128947	572.802	289.022	0.863367	132108	0.604409	1446.92	Besni
189637	636.752	403.719	0.77331	209580	0.613785	1870.28	Besni
137508	604.114	292.096	0.875338	141818	0.601522	1529.79	Besni
75173	365.803	267.583	0.681848	78359	0.679954	1087.03	Besni
115859	488.489	305.091	0.780977	120546	0.742643	1351.42	Besni
92188	374.72	324.303	0.500991	95920	0.7476	1190.81	Besni
153824	536.607	369.286	0.725532	159063	0.739084	1582.15	Besni
85492	437.014	250.893	0.818781	89018	0.723344	1182.58	Besni
106312	464.332	295.317	0.771687	111089	0.729684	1306.45	Besni
210923	984.045	367.28	0.927737	278217	0.507352	2697.75	Besni
89138	507.143	226.217	0.895003	93549	0.738386	1262.58	Besni
83567	465.101	230.904	0.86806	86859	0.609222	1199.02	Besni
171256	531.373	412.383	0.630647	174277	0.701915	1559.21	Besni
77105	419.954	238.839	0.822526	80497	0.668995	1131.54	Besni
100443	457.57	283.611	0.784743	104186	0.673789	1269.07	Besni
72606	424.472	223.233	0.850542	76975	0.683853	1117.11	Besni
83555	457.546	235.1	0.857894	86694	0.711227	1159.78	Besni
146268	588.009	321.608	0.837169	150416	0.695421	1535.29	Besni
113608	559.267	264.029	0.881546	118098	0.627863	1394.09	Besni
75058	424.764	228.846	0.842459	78952	0.685461	1130.39	Besni
116406	612.665	251.833	0.911615	125638	0.52626	1480.95	Besni
100319	480.779	267.669	0.830687	104255	0.639614	1289.21	Besni
143386	469.277	397.31	0.53216	146328	0.75026	1422.01	Besni
164782	660.364	322.621	0.872536	169000	0.757758	1654.99	Besni
71639	400.414	231.62	0.815717	76252	0.642462	1101.88	Besni
141220	575.682	316.621	0.835169	144300	0.659152	1507.94	Besni
88290	514.436	221.445	0.902609	92317	0.555157	1277.39	Besni
102569	515.395	259.194	0.864342	106888	0.573242	1331.8	Besni
182160	997.292	271.872	0.962124	221527	0.379856	2303.69	Besni
208264	675.098	395.579	0.810341	212813	0.771748	1755.17	Besni
133101	641.51	265.314	0.910469	136793	0.582496	1544.71	Besni
169009	719.506	301.565	0.907927	174718	0.716927	1781.38	Besni
81901	450.828	237.209	0.850383	85000	0.583108	1192.01	Besni
80678	457.925	229.704	0.865089	85201	0.60736	1226.24	Besni
101661	440.982	295.531	0.742212	105429	0.71329	1268.05	Besni
82207	451.006	235.16	0.853305	84780	0.629437	1182.27	Besni
166275	602.308	356.236	0.80634	168292	0.719282	1580.96	Besni
188651	621.013	390.308	0.777808	192922	0.747156	1698.39	Besni
202118	684.603	379.719	0.83208	209242	0.717219	1827.9	Besni
97375	468.904	268.267	0.820173	100169	0.694717	1244.25	Besni
64303	442.745	187.029	0.906395	67199	0.686235	1081.68	Besni
86715	440.474	254.336	0.816452	89920	0.735371	1173.26	Besni
155702	655.399	304.612	0.88543	160709	0.697046	1626.91	Besni
84295	458.844	238.289	0.854577	88521	0.708451	1202.58	Besni
177206	699.618	328.112	0.883205	181412	0.739153	1754.38	Besni
110897	518.788	275.261	0.847632	115550	0.730436	1365.58	Besni
56903	360.815	204.038	0.824755	59797	0.718427	980.39	Besni
113029	558.516	265.284	0.879996	116783	0.662092	1419.58	Besni
69579	398.597	224.579	0.826169	71648	0.719386	1071.64	Besni
163442	594.759	351.426	0.806766	167471	0.704686	1621.96	Besni
114289	580.601	261.764	0.8926	120657	0.649487	1455.89	Besni
74652	424.981	231.604	0.838452	79014	0.592617	1157.11	Besni
90559	473.576	246.92	0.853316	95477	0.673231	1328.74	Besni
104352	562.336	239.403	0.904851	107968	0.668067	1390.73	Besni
82161	441.796	246.81	0.829402	86909	0.630243	1222.16	Besni
131816	532.731	322.683	0.795682	138992	0.722192	1488.84	Besni
163082	696.149	302.222	0.900848	167442	0.763779	1687.18	Besni
77012	425.219	239.47	0.826343	81325	0.65428	1131.53	Besni
81604	528.586	204.74	0.921939	87172	0.49146	1299.39	Besni
82853	430.115	251.176	0.811773	85292	0.746437	1139.84	Besni
145693	591.18	321.431	0.839272	151644	0.648528	1595.36	Besni
96443	541.2	232.548	0.902977	101271	0.553411	1352.48	Besni
168620	730.761	295.5	0.914594	172003	0.79673	1725	Besni
193032	661.149	376.432	0.822088	197672	0.631121	1744.27	Besni
140897	588.071	308.026	0.851847	146231	0.733999	1536.47	Besni
118988	483.34	315.248	0.758022	122375	0.784467	1356.4	Besni
103666	456.383	293.922	0.765003	107992	0.647265	1332.2	Besni
68231	394.647	228.161	0.815937	71591	0.664527	1099.23	Besni
88928	395.725	300.227	0.651468	93821	0.671064	1239.54	Besni
117077	496.131	314.547	0.773332	123305	0.708832	1419.16	Besni
123056	618.142	256.95	0.90951	128101	0.641284	1522.03	Besni
94455	496.895	245.244	0.869716	97496	0.719888	1256.32	Besni
89311	429.279	270.859	0.775813	94720	0.682649	1234.55	Besni
68982	400.737	223.908	0.829343	73278	0.728765	1105.79	Besni
204864	596.64	440.497	0.674476	209457	0.751009	1726.25	Besni
83693	437.735	245.424	0.82804	87230	0.70286	1177.86	Besni
75529	418.518	233.99	0.829106	79168	0.65867	1143.29	Besni
121034	518.72	305.736	0.807839	125665	0.706665	1418.3	Besni
105192	440.563	305.792	0.719885	107313	0.736902	1244.05	Besni
77402	469.459	215.08	0.888878	80680	0.621329	1162	Besni
87857	380.776	300.909	0.612784	90968	0.728499	1144.34	Besni
139399	522.468	348.282	0.745407	144034	0.693631	1471.51	Besni
178334	626.064	366.237	0.811045	181715	0.789452	1630.7	Besni
144084	555.921	332.124	0.801921	149076	0.729421	1506.26	Besni
84975	511.875	215.448	0.907107	88730	0.629612	1246.36	Besni
118043	493.765	308	0.781601	122903	0.675597	1394.1	Besni
102769	515.608	261.137	0.862261	109161	0.650231	1378.31	Besni
136960	559.296	313.31	0.828367	139458	0.722142	1458.55	Besni
113206	548.971	264.258	0.876517	116787	0.725861	1388.48	Besni
155057	610.678	325.508	0.846098	159681	0.761057	1564.69	Besni
116715	571.049	278.837	0.872681	127342	0.602618	1488.32	Besni
91146	498.392	241.897	0.874317	97149	0.672893	1293.56	Besni
101223	496.533	276.866	0.830111	109593	0.713612	1345.43	Besni
79492	422.567	243.116	0.81792	82708	0.637353	1122.83	Besni
93234	452.927	268.763	0.804913	97428	0.715907	1222.89	Besni
167279	690.072	311.996	0.891957	171794	0.578674	1680.12	Besni
193558	769.425	321.686	0.908407	197851	0.605916	1865.3	Besni
146175	592.909	319.02	0.842907	149156	0.632833	1529.07	Besni
108076	516.073	270.743	0.851335	112975	0.698815	1378.77	Besni
131811	573.542	295.423	0.857139	135814	0.711507	1457.02	Besni
129038	540.815	306.818	0.823494	134796	0.648758	1459.35	Besni
130868	613.173	273.182	0.895271	134139	0.536784	1513.35	Besni
206720	713.473	373.643	0.851905	210114	0.780576	1866.09	Besni
205497	632.728	414.188	0.755969	209486	0.769289	1736.84	Besni
146420	598.073	314.391	0.850687	149403	0.746736	1531.95	Besni
126014	523.186	309.117	0.806792	130059	0.736226	1396.91	Besni
101103	484.166	269.146	0.831252	105500	0.67	1307.68	Besni
61444	371.694	213.18	0.81918	64321	0.737473	1006.98	Besni
160605	630.617	330.771	0.851398	167411	0.723185	1679.56	Besni
100649	433.367	300.458	0.720639	103883	0.724719	1257.03	Besni
112808	542.505	267.202	0.870293	116961	0.743155	1390.4	Besni
105951	521.113	267.727	0.857934	111368	0.73356	1377.25	Besni
177916	581.71	394.525	0.734863	181352	0.737207	1647.51	Besni
109254	483.164	289.829	0.800108	111624	0.740103	1293.22	Besni
128574	601.8	276.248	0.888418	135975	0.674002	1508.93	Besni
124166	525.945	304.156	0.815821	126960	0.728999	1388.68	Besni
133784	581.287	300.636	0.855871	139806	0.67959	1502.66	Besni
80481	481.064	217.561	0.891891	85153	0.714974	1219.11	Besni
63491	326.633	248.322	0.649631	64892	0.734357	950.297	Besni
109791	477.034	294.534	0.786627	112766	0.74478	1290.24	Besni
89236	389.682	295.332	0.652394	92014	0.696993	1144.04	Besni
152267	598.968	331.249	0.833159	157353	0.59405	1570.5	Besni
89721	530.157	223.5	0.906794	95252	0.547433	1295.38	Besni
129493	497.788	339.526	0.731287	136555	0.64753	1447.68	Besni
74966	465.361	209.28	0.893172	78159	0.712415	1157.09	Besni
136180	551.454	316.47	0.818937	139701	0.72989	1461.03	Besni
102013	453.893	292.13	0.765354	106036	0.637828	1266.26	Besni
169078	644.931	336.572	0.853024	173362	0.682989	1629.63	Besni
78304	390.973	262.77	0.740466	82394	0.623286	1137.71	Besni
54321	395.012	182.324	0.887106	58632	0.625069	1021.99	Besni
101439	524.817	251.161	0.878051	107520	0.733312	1393.21	Besni
118787	562.281	273.33	0.873898	125083	0.643713	1459.58	Besni
85517	410.622	269.817	0.753809	88349	0.702941	1127.89	Besni
72653	403.191	231.056	0.819508	74718	0.663898	1062.07	Besni
126515	595.343	277.909	0.88436	134574	0.712977	1461.11	Besni
117714	480.63	314.027	0.757043	120922	0.7243	1361.88	Besni
62451	337.29	237.705	0.709455	64499	0.696275	963.009	Besni
107895	462.046	300.559	0.75951	110755	0.764048	1277.79	Besni
199015	615.417	413.927	0.740009	201464	0.76857	1687.87	Besni
130388	511.898	326.312	0.770486	132727	0.719184	1393.97	Besni
106440	501.044	273.194	0.838274	108790	0.750751	1302.47	Besni
109878	541.948	260.084	0.877321	112825	0.689193	1369.2	Besni
78984	427.494	236.883	0.832438	82328	0.698417	1169.48	Besni
135899	625.348	286.9	0.888548	144444	0.632589	1594.21	Besni
193818	678.56	367.9	0.840263	201241	0.791546	1766.87	Besni
137788	654.47	272.301	0.909335	141442	0.706431	1562.27	Besni
71800	431.009	218.716	0.861681	77521	0.648155	1187.72	Besni
96210	482.512	262.674	0.838833	102157	0.686587	1270.56	Besni
103057	548.405	241.123	0.898154	107983	0.715654	1391.21	Besni
104602	478.223	279.361	0.811635	106906	0.779914	1263.01	Besni
105467	465.574	290.202	0.781965	109052	0.730381	1302.36	Besni
83059	440.56	243.637	0.833171	88806	0.685809	1238.16	Besni
99378	466.397	275.576	0.806774	102653	0.687038	1260.34	Besni
90585	489.648	239.35	0.872384	95774	0.672345	1270.27	Besni
83065	445	241.331	0.840174	87785	0.72055	1182.56	Besni
54357	362.595	192.949	0.846659	56006	0.699918	945.828	Besni
169645	731.562	299.413	0.912409	174278	0.755516	1753.02	Besni
70461	376.171	243.955	0.761196	72819	0.728279	1046.69	Besni
105347	476.804	282.026	0.80631	108072	0.769035	1266.88	Besni
160583	630.645	326.245	0.855793	165385	0.751899	1646.56	Besni
101772	477.909	273.404	0.820195	104567	0.684338	1266.66	Besni
61123	329.33	257.268	0.624299	70556	0.723264	1128.08	Besni
90375	480.632	241.017	0.865182	93826	0.643559	1251.68	Besni
131847	560.421	302.641	0.84165	134950	0.744314	1446.14	Besni
81998	423.633	251.239	0.805158	83932	0.729481	1130.43	Besni
105924	497.701	274.576	0.83405	109179	0.716535	1295.27	Besni
121757	486.521	323.352	0.747181	125067	0.759913	1357.89	Besni
116198	494.259	301.683	0.792113	118786	0.719368	1328.07	Besni
86846	459.396	242.62	0.849165	89047	0.725931	1173.31	Besni
77799	419.339	238.343	0.822767	80688	0.648001	1114.45	Besni
75242	391.678	248.089	0.773824	77890	0.668176	1077.42	Besni
113164	486.766	297.11	0.792112	116531	0.739561	1313.09	Besni
194864	657.868	378.058	0.818384	197430	0.786427	1700.94	Besni
103313	503.451	266.445	0.848474	108615	0.667043	1343.02	Besni
98464	488.215	261.724	0.844165	101977	0.679432	1259.07	Besni
97377	503.992	252.5	0.865448	101317	0.708423	1281.25	Besni
169880	648.904	339.131	0.852565	177170	0.713767	1660.68	Besni
69746	370.56	241.914	0.757501	72724	0.712603	1027.51	Besni
172334	595.818	375.021	0.777064	174610	0.636111	1591.89	Besni
192815	731.44	337.102	0.887465	196576	0.734399	1803.69	Besni
92121	432.062	275.691	0.769969	95197	0.715447	1193.84	Besni
82462	434.571	244.457	0.82678	85611	0.649911	1174.2	Besni
53325	351.204	197.214	0.827452	56030	0.706142	934.49	Besni
151703	595.107	330.343	0.831785	156402	0.671309	1608.6	Besni
40702	274.169	191.378	0.716068	41924	0.721615	771.797	Besni
81480	434.1	242.702	0.829106	84581	0.674012	1162.37	Besni
104669	546.673	248.528	0.890686	110984	0.687346	1398.55	Besni
85390	403.73	272.97	0.73679	88615	0.7105	1156.72	Besni
178692	594.722	384.038	0.763554	181288	0.747046	1622.03	Besni
104385	488.898	277.684	0.823043	108197	0.77217	1315.84	Besni
206689	746.145	355.301	0.879347	212569	0.745809	1876.03	Besni
98166	420.702	299.584	0.702074	100659	0.707426	1245.03	Besni
156769	662.967	307.868	0.885636	161782	0.742109	1646.53	Besni
182823	700.008	337.707	0.875933	190749	0.698891	1789.25	Besni
96139	498.388	250.112	0.864959	100204	0.675361	1298.14	Besni
99177	494.055	260.974	0.849103	104468	0.614175	1317.69	Besni
76114	435.388	224.728	0.856495	77824	0.681927	1100.93	Besni
111056	514.715	277.879	0.841748	114995	0.670786	1370.91	Besni
51350	342.655	204.011	0.803442	54576	0.649178	930.051	Besni
144973	614.815	304.332	0.868895	150534	0.733669	1539.43	Besni
182788	621.207	379.424	0.791796	188848	0.733061	1679.08	Besni
128442	585.982	281.601	0.87696	133704	0.750684	1499.36	Besni
76364	381.802	258.588	0.735723	78977	0.747348	1075.8	Besni
158808	658.957	308.528	0.883619	162376	0.726611	1624.34	Besni
106923	591.116	234.823	0.917709	111428	0.522279	1425.11	Besni
60640	369.27	218.529	0.806096	66145	0.71172	1036.53	Besni
88257	452.925	254.482	0.827229	92886	0.736088	1209.62	Besni
102868	430.026	312.973	0.68579	106439	0.717931	1251.8	Besni
61539	364.256	220.362	0.796252	65462	0.723392	1056.49	Besni
129292	614.547	270.085	0.898249	133475	0.68969	1531.74	Besni
57999	311.022	243.476	0.622242	61519	0.656335	968.697	Besni
88315	456.741	248.15	0.839535	92046	0.644193	1205.86	Besni
88250	478.482	238.322	0.867131	92397	0.6066	1217.13	Besni
141137	600.126	305.767	0.860468	145158	0.585589	1495.98	Besni
123980	531.868	332.576	0.780386	138078	0.667622	1539.94	Besni
49371	320.643	200.246	0.781015	52692	0.675122	921.059	Besni
172783	820.724	352.194	0.903245	219952	0.496937	2289.89	Besni
86852	456.479	248.607	0.838684	90550	0.607854	1207.53	Besni
91464	433.22	273.255	0.775982	93852	0.717702	1182.21	Besni
93441	396.791	300.813	0.652122	95370	0.723317	1157.77	Besni
94211	450.005	269.287	0.801191	96340	0.716848	1194.63	Besni
124630	585.094	275.494	0.882211	128308	0.681832	1485.99	Besni
116361	554.49	277.067	0.866211	125132	0.747413	1434.39	Besni
152992	572.705	341.246	0.803097	155411	0.777525	1500.25	Besni
147843	651.003	299.743	0.887694	155494	0.719326	1633.72	Besni
135036	582.688	301.568	0.855654	139124	0.634568	1509.37	Besni
128107	616.994	267.981	0.900753	133001	0.621483	1513.47	Besni
79975	439.313	240.494	0.836849	83384	0.691162	1162.61	Besni
60674	345.315	225.219	0.758036	62614	0.735576	987.617	Besni
96404	470.102	264.236	0.827081	99678	0.754547	1265.03	Besni
222915	731.559	389.947	0.846093	227170	0.770543	1876.31	Besni
108379	482.566	289.386	0.800239	111707	0.70271	1316.87	Besni
62562	407.939	198.71	0.873342	64694	0.628259	1030.76	Besni
204226	648.204	402.283	0.784118	207198	0.773988	1724.66	Besni
77985	473.341	214.092	0.891866	82967	0.674377	1214.98	Besni
104728	495.672	272.687	0.835075	109157	0.730219	1316.4	Besni
85449	471.125	238.329	0.862609	89794	0.58477	1246.2	Besni
97558	477.111	261.916	0.835846	100259	0.777045	1229.81	Besni
97049	548.221	231.661	0.906331	102899	0.616302	1399.67	Besni
58870	355.136	212.029	0.802213	60490	0.734956	940.363	Besni
83889	450.989	241.33	0.84478	88842	0.729825	1183.98	Besni
110527	514.589	275.583	0.844509	114538	0.689699	1360.82	Besni
66793	362.231	236.404	0.757673	69506	0.684109	1024.17	Besni
91665	485.452	243.08	0.865604	95741	0.700032	1244.56	Besni
126149	478.877	345.92	0.691521	134778	0.624908	1549.18	Besni
101618	443.493	293.384	0.749918	104508	0.750242	1238.63	Besni
96442	450.408	276.923	0.788663	100712	0.703058	1239.31	Besni
79397	434.994	235.519	0.840745	83074	0.696117	1148.63	Besni
86658	439.229	258.304	0.808799	89048	0.699758	1184.58	Besni
113046	548.941	265.305	0.875453	116819	0.677182	1385.64	Besni
53373	330.677	215.702	0.757959	56639	0.654281	936.823	Besni
80274	404.302	256.062	0.773871	84523	0.663542	1153.62	Besni
89431	464.834	247.352	0.846663	92412	0.624797	1198.85	Besni
84383	403.909	271.252	0.740945	87629	0.674945	1140.61	Besni
98260	520.103	245.21	0.881885	103918	0.576457	1345.69	Besni
104656	489.454	273.453	0.829377	106961	0.74161	1273.13	Besni
100186	462.506	277.699	0.799683	101921	0.682243	1217.83	Besni
122617	503.688	322.623	0.767941	131499	0.643254	1429.35	Besni
117301	507.24	296.83	0.810899	122361	0.618402	1407.4	Besni
48007	302.611	209.116	0.722817	50679	0.677051	889.743	Besni
165681	615.211	346.702	0.826082	170954	0.735824	1635.79	Besni
83929	429.09	252.038	0.809314	87269	0.704841	1176.23	Besni
109701	546.635	256.615	0.882962	113425	0.580625	1405.87	Besni
117098	637.77	237.472	0.928094	120417	0.652866	1484.33	Besni
107082	536.852	258.717	0.876218	112201	0.729521	1354.71	Besni
102944	477.168	277.222	0.813921	108053	0.715684	1339.1	Besni
53077	327.288	212.231	0.761254	55532	0.646413	934.708	Besni
78161	453.203	222.605	0.871057	81689	0.733493	1161.29	Besni
122433	585.294	270.709	0.88661	128445	0.579493	1526.71	Besni
142069	662.714	275.44	0.909537	148697	0.732277	1622.58	Besni
82585	436.182	264.874	0.794507	93928	0.588447	1320.46	Besni
96753	477.5	261.943	0.836103	99964	0.694107	1258.68	Besni
106393	472.309	287.594	0.793239	109501	0.678388	1281.38	Besni
182122	620.487	376.489	0.794883	187560	0.72183	1695.23	Besni
49691	336.678	189.262	0.827039	52077	0.72495	919.419	Besni
79057	436.39	236.895	0.839828	82642	0.654597	1148.15	Besni
110785	560.007	259.397	0.886252	116070	0.558567	1456.76	Besni
171749	671.255	328.91	0.871726	175679	0.738159	1689.59	Besni
149841	547.456	354.585	0.7619	155682	0.711847	1544.34	Besni
97513	486.902	257.27	0.849007	100196	0.688909	1272.88	Besni
97254	422.044	305.875	0.689015	100815	0.63335	1254.47	Besni
132116	519.68	325.332	0.779803	133811	0.745071	1393.34	Besni
132730	535.981	324.959	0.795245	139810	0.688559	1475.66	Besni
68576	377.137	235.129	0.781856	71551	0.719075	1087.11	Besni
109011	504.395	277.034	0.835665	111306	0.620933	1297.15	Besni
109438	502.729	280.344	0.830081	113476	0.635473	1323.56	Besni
76551	394.443	255.254	0.762382	81613	0.632365	1130.4	Besni
121080	573.404	270.633	0.881612	124432	0.72379	1418.38	Besni
86202	437.771	253.909	0.814613	90825	0.705146	1199.81	Besni
134913	639.602	273.092	0.904265	139500	0.736726	1535.25	Besni
175247	713.017	316.398	0.896153	179961	0.592163	1739.28	Besni
195281	609.83	408.536	0.742436	197426	0.769656	1639.1	Besni
131496	506.115	334.332	0.750752	134210	0.705523	1412.02	Besni
175946	604.53	372.85	0.787151	180289	0.775838	1622.81	Besni
66265	424.559	203.381	0.877793	70487	0.628015	1126.77	Besni
106938	498.434	274.59	0.834567	110118	0.773187	1285.85	Besni
76624	473.966	207.737	0.898831	80356	0.661008	1205.82	Besni
88747	425.007	268.668	0.774846	92317	0.761313	1184.16	Besni
165940	624.845	340.696	0.838275	170781	0.779464	1641.14	Besni
181926	579.919	400.802	0.722726	185474	0.716809	1628.16	Besni
148073	599.363	327.084	0.837968	152985	0.690156	1557.61	Besni
103915	516.486	260.105	0.863933	106499	0.691085	1285.06	Besni
71141	417.137	219.185	0.850824	73629	0.725455	1085.21	Besni
169494	614.994	352.281	0.819681	172094	0.740123	1607.53	Besni
47253	360.019	172.508	0.877725	51538	0.71132	940.542	Besni
102960	522.381	252.365	0.875562	105956	0.741659	1311.16	Besni
81570	450.481	233.608	0.855032	84540	0.733213	1162.26	Besni
62526	357.205	228.863	0.767788	65994	0.707308	1006.6	Besni
141613	588.372	311.296	0.848571	149492	0.721794	1521.81	Besni
105961	497.701	275.972	0.832189	109992	0.697562	1347.99	Besni
125282	536.499	299.437	0.829753	129758	0.735949	1404.3	Besni
87252	433.485	261.067	0.798307	90160	0.735795	1166.52	Besni
108771	472.208	294.454	0.781769	111241	0.770049	1267.65	Besni
138202	556.982	318.253	0.82068	143228	0.697215	1576.34	Besni
92024	453.715	260.486	0.818773	94643	0.751861	1204.62	Besni
76708	458.045	216.341	0.88143	78694	0.658393	1135.68	Besni
105053	490.41	277.084	0.825087	107939	0.670404	1297.28	Besni
72924	434.223	220.492	0.861484	77356	0.621603	1183.24	Besni
89169	408.19	281.397	0.724403	93087	0.713855	1187.09	Besni
93042	470.566	254.261	0.841453	95156	0.632397	1216.1	Besni
71054	364.751	249.723	0.728881	72956	0.727848	1027.21	Besni
90675	426.236	275.287	0.76346	92030	0.740107	1163.02	Besni
137921	598.761	297.202	0.868116	142159	0.748757	1510.85	Besni
164440	580.776	362.346	0.781505	167563	0.770427	1554.37	Besni
71502	490.433	189.443	0.922383	75157	0.500546	1182.85	Besni
144250	606.352	305.33	0.863964	148528	0.800255	1547.08	Besni
223075	694.248	411.81	0.805073	225916	0.76494	1812.57	Besni
56244	398.802	182.844	0.888703	58530	0.656366	1008.13	Besni
142239	614.834	297.735	0.874928	148078	0.643516	1553.11	Besni
78632	407.94	245.821	0.79805	79715	0.689011	1068.73	Besni
93430	467.637	258.947	0.832693	98337	0.712988	1258.97	Besni
97583	522.787	241.941	0.886468	101231	0.725983	1298.73	Besni
123654	542.42	293.473	0.840994	126325	0.65953	1400.52	Besni
85894	477.172	231.04	0.874965	89369	0.730391	1202.49	Besni
235047	772.957	388.202	0.864735	239093	0.711673	1942.05	Besni
152611	663.133	297.418	0.893781	158488	0.614715	1755.97	Besni
83932	499.238	224.472	0.893215	88572	0.670844	1258.06	Besni
117354	520.327	289.662	0.830719	121057	0.712065	1374.17	Besni
66315	363.579	234.454	0.764308	68906	0.688944	1015.02	Besni
87663	405.678	277.455	0.729549	89710	0.743688	1126.52	Besni
95364	481.564	253.847	0.849785	97623	0.737952	1225.35	Besni
78787	450.256	228.913	0.861118	80567	0.677376	1142.63	Besni
160451	593.75	346.757	0.811745	163523	0.785231	1548.61	Besni
121077	521.191	302.109	0.814864	125856	0.734512	1403.04	Besni
62280	388.582	205.514	0.848695	63596	0.79144	977.906	Besni
106897	481.795	288.66	0.800648	109314	0.715983	1284.69	Besni
111568	491.112	293.911	0.801153	114128	0.734759	1303.22	Besni
61556	340.784	231.435	0.734021	63181	0.734804	956.302	Besni
47609	331.894	184.213	0.831826	49720	0.748193	874.091	Besni
61861	345.944	235.43	0.732706	67390	0.70228	1063.62	Besni
84855	420.351	275.881	0.75449	90768	0.673805	1172.64	Besni
127292	639.851	258.382	0.91484	129101	0.534715	1496.06	Besni
125968	522.544	308.048	0.807757	129444	0.739579	1414.08	Besni
48488	275.338	226.802	0.566991	50103	0.669594	859.326	Besni
84774	416.281	264.099	0.772985	90393	0.697671	1209.58	Besni
78921	376.988	268.833	0.701055	82584	0.719924	1144.96	Besni
145235	609.63	306.608	0.864321	148876	0.682495	1538.32	Besni
87039	497.058	236.213	0.879866	96247	0.636981	1271.34	Besni
181126	949.663	293.387	0.951082	225592	0.414154	2352.03	Besni
142419	580.438	318.181	0.836365	145899	0.754858	1512.66	Besni
92619	398.621	296.883	0.667315	95666	0.742997	1173.39	Besni
68510	348.401	252.993	0.687531	70513	0.670877	1028.84	Besni
48551	302.813	205.963	0.733057	50748	0.742824	862.001	Besni
92472	424.42	282.212	0.746902	95982	0.746163	1204.61	Besni
100928	465.18	287.016	0.786964	105549	0.686193	1310.51	Besni
96920	447.595	277.436	0.784731	100285	0.687259	1229.91	Besni
96762	457.477	277.387	0.795206	101717	0.788683	1248.75	Besni
151908	594.183	328.568	0.833198	155600	0.721208	1560.02	Besni
75368	387.852	250.585	0.763268	77706	0.735097	1078.41	Besni
168269	614.38	353.466	0.817927	173527	0.756241	1641.46	Besni
99333	422.877	302.21	0.699481	101942	0.720765	1191.35	Besni
102722	416.899	317.543	0.647956	107169	0.72442	1261.99	Besni
104468	542.178	250.063	0.887286	108119	0.646933	1360.5	Besni
73699	408.586	231.142	0.824602	76106	0.703181	1079.58	Besni
71918	448.528	207.751	0.886262	75002	0.696374	1091.5	Besni
127933	560.723	294.663	0.850791	130766	0.667778	1426.6	Besni
73294	445.246	217.62	0.872416	76157	0.654434	1147.6	Besni
189069	679.489	357.047	0.850816	195810	0.612143	1831.91	Besni
159064	570.217	368.221	0.763544	165584	0.781964	1563.83	Besni
120818	492.607	315.201	0.768488	123230	0.672032	1311.52	Besni
59890	402.416	194.669	0.875206	61673	0.719711	1034.14	Besni
137593	558.059	316.713	0.823355	142114	0.677765	1478.6	Besni
166654	607.996	349.659	0.818083	169060	0.753518	1574.16	Besni
55858	298.859	239.899	0.596359	58630	0.681453	915.13	Besni
105308	473.313	284.171	0.799711	108094	0.787014	1259.93	Besni
67468	424.564	207.823	0.872004	70674	0.611694	1105.04	Besni
132680	549.865	308.392	0.827917	136612	0.650654	1453.89	Besni
154197	582.612	343.26	0.808006	160008	0.762219	1555.82	Besni
225043	740.004	390.301	0.849598	229195	0.744187	1853.89	Besni
66613	433.194	199.815	0.887266	70454	0.708951	1085.16	Besni
141559	594.114	306.31	0.856845	146674	0.76449	1530.6	Besni
77622	460.143	226.581	0.87036	82990	0.651213	1205.14	Besni
179668	690.433	332.553	0.876359	181954	0.779403	1681.98	Besni
105091	507.685	268.087	0.849208	108296	0.700271	1295.59	Besni
66938	356.323	248.674	0.716206	69880	0.708661	1022.71	Besni
97494	451.783	278.28	0.787778	101878	0.689696	1254.76	Besni
101770	468.668	279.813	0.802212	103475	0.785178	1233.82	Besni
88338	504.482	227.128	0.892918	90790	0.727157	1230.49	Besni
119336	563.546	275.356	0.872501	125523	0.668156	1469.76	Besni
126019	520.68	316.19	0.794501	130948	0.694511	1422.24	Besni
154498	621.352	318.598	0.858538	159694	0.750049	1585.78	Besni
82632	471.367	227.393	0.875944	87501	0.633079	1243.99	Besni
218459	571.289	492.275	0.507432	228259	0.731974	1947.46	Besni
150420	607.71	316.81	0.853363	153905	0.642409	1557.27	Besni
110296	487.691	289.925	0.804107	113271	0.6871	1316.11	Besni
171264	609.643	359.225	0.80796	174156	0.771738	1592.1	Besni
110936	500.931	286.252	0.820644	113888	0.732396	1319.43	Besni
54502	346.458	204.081	0.808096	56464	0.636111	927.283	Besni
142415	532.084	342.421	0.765407	144862	0.770644	1449.8	Besni
94282	494.163	244.804	0.86867	97707	0.702386	1269.68	Besni
68799	356.568	253.255	0.703943	71879	0.700929	1041.27	Besni
79058	454.437	236.964	0.853285	82555	0.578256	1175.03	Besni
85646	469.775	238.539	0.86149	92673	0.681044	1226.89	Besni
107486	462.813	296.091	0.768571	108914	0.759967	1235.08	Besni
149703	637.873	304.623	0.878599	154549	0.593805	1596.36	Besni
187391	660.656	362.315	0.836205	189799	0.713947	1682.48	Besni
115272	511.472	291.591	0.821574	119773	0.62476	1392.65	Besni
83248	430.077	247.839	0.817263	85839	0.668793	1129.07	Besni
87350	440.736	259.293	0.808629	90899	0.636476	1214.25	Besni
99657	431.707	298.837	0.721684	106264	0.741099	1292.83	Besni
93523	476.344	254.176	0.845739	97653	0.658798	1258.55	Besni
85609	512.082	215.272	0.907345	89197	0.63202	1272.86	Besni

## Sheet: Citation_Request
Citation Request : CINAR I., KOKLU M. and TASDEMIR S., (2020). Classification of Raisin Grains Using Machine Vision and Artificial Intelligence Methods, Gazi Journal of Engineering Sciences, vol. 6, no. 3, pp. 200-209, December, 2020, DOI: https://doi.org/10.30855/gmbd.2020.03.03
